# Supplementary material for: Pediatric Surgical Opioid Prescribing by Procedure, 2020–2021
Source: Oxford University Press journal article supplement (doi:10.1542/peds.2024-065814), 2024-06-26
Supplement: peds.2024-065814supplementarydata.pdf [file peds.2024-065814supplementarydata.pdf]

## Supplemental Information

### TABLE OF CONTENTS

1. Details on constructing the crosswalk between procedure code and procedure type
  2. Method for breaking ties between procedure types
- Supplemental Table 4: Opioids included in sample  
 Supplemental Table 5: Sample inclusion and exclusion criteria  
 Supplemental Table 6: Full results for patients aged 0-11 years  
 Supplemental Table 7: Top 10 procedures by share of total MMEs among children aged 0–11 years, by payer type  
 Supplemental Table 8: Full results for patients aged 12-21 years  
 Supplemental Table 9: Top 10 procedures by share of total MMEs among adolescents aged 12–21 years, by payer type  
 Supplemental Table 10: Results from main analysis versus sensitivity analysis

### 1: DETAILS ON CONSTRUCTING THE CROSSWALK BETWEEN PROCEDURE CODE AND PROCEDURE TYPE

We downloaded all versions of the Agency for Healthcare Research and Quality's Surgical Flags for Services and Procedures algorithm from 2014–2022. We identified 3664 unique Current Procedural Terminology (CPT) codes that were classified as being related to a major surgical procedure in the 2014–2022 versions of these algorithm. We did not include the small number of Healthcare Common Procedural Coding System (HCPCS) codes in the algorithm, as these typically represented temporary codes.

We created a crosswalk between the 3664 CPT codes and 1082 procedure types. In doing so, we used the following general principles:

- For procedure codes that corresponded to orthopedic procedures involving the upper or lower extremity (eg, arthrodesis and open fracture treatment) as well as for amputation, we lumped codes into a procedure type for upper extremity procedures and a procedure type for lower extremity procedures. The exception was arthroplasty and arthroscopy. For these procedures, we created procedure types for each joint, as these are among the most common indications for post-operative opioid prescriptions.
- For procedure codes that corresponded to procedures on individual vessels and nerves, we lumped codes together (eg, sympathectomy).
- When there were procedure codes for open, percutaneous, or laparoscopic versions of the same procedure (eg, open versus laparoscopic appendectomy), we left them as separate procedure types rather than lumping them together into a single procedure type.
- When there were procedure codes for multiple approaches for the same operation (eg, cervical versus intracranial approach to repair an intracranial aneurysm), we lumped them together into a single procedure type.
- When there were two procedure codes for the same operation with and without some additional intervention (eg, reconstruction or lymphadenectomy), we lumped these codes into a single procedure type.
- When there were procedure codes for benign versus malignant tumors of the same body part, we lumped these codes into a single procedure type.
- When there were body part-specific procedure codes for soft tissue operations (eg, excision of soft tissue lesion on the back), we lumped the codes together into a single procedure. We did the same for procedure codes for specific types of lymphadenectomy and for excision/curettage of a bone cyst or benign tumor for specific body parts.

The crosswalk is included at the end of this Appendix to facilitate use by other investigators.

### 2: METHOD FOR BREAKING TIES BETWEEN PROCEDURE TYPES

We defined the beginning and end of a surgical episode as the procedure date if there were no hospitalizations or observation stays following the claim with the procedure code for surgery, or as the admission and discharge date of any such hospitalizations or observation stays. In most cases, any given surgical episode only included surgical claims that mapped to a single procedure type. When there were multiple procedure types, we selected the procedure with the highest “probability of a dispensed surgical opioid prescription.” Specifically, for each procedure type, we found instances during the study period in which that procedure was the only procedure performed during a surgical episode (eg, instances in which appendectomy occurred and no other major surgical procedures occurred during the episode). The proportion of those instances associated with a dispensed opioid prescription was the probability of a dispensed surgical opioid prescription.

If there were still ties, we selected the procedure type that occurred the most often in the sample. If there was a tie even after taking this additional step, we randomly selected a procedure type.

| <b>SUPPLEMENTAL TABLE 4</b> Opioids Included in Sample |                              |
|--------------------------------------------------------|------------------------------|
| <b>Opioid (strength in mg except where noted)</b>      | <b>MME Conversion Factor</b> |
| Buprenorphine, transdermal patch (MCG/HR)              | 12.6                         |
| Buprenorphine, buccal film (MCG)                       | 0.03                         |
| Butorphanol                                            | 7                            |
| Codeine                                                | 0.15                         |
| Dihydrocodeine                                         | 0.25                         |
| Fentanyl, buccal/SL tablet or lozenge/troche (MCG)     | 0.13                         |
| Fentanyl, film or oral spray (MCG)                     | 0.18                         |
| Fentanyl, nasal spray (MCG)                            | 0.16                         |
| Fentanyl, transdermal patch (MCG/HR)                   | 7.2                          |
| Hydrocodone                                            | 1                            |
| Hydromorphone                                          | 4                            |
| Levomethadyl acetate                                   | 8                            |
| Levorphanol tartrate                                   | 11                           |
| Meperidine                                             | 0.1                          |
| Methadone                                              | 3                            |
| Morphine                                               | 1                            |
| Opium                                                  | 1                            |
| Oxycodone                                              | 1.5                          |
| Oxymorphone                                            | 3                            |
| Pentazocine                                            | 0.37                         |
| Propoxyphene                                           | 0.23                         |
| Tapentadol                                             | 0.4                          |
| Tramadol                                               | 0.1                          |

| <b>SUPPLEMENTAL TABLE 5</b> Sample Inclusion and Exclusion Criteria |                        |                        |                        |                        |
|---------------------------------------------------------------------|------------------------|------------------------|------------------------|------------------------|
| <b>Cohort criteria</b>                                              | <b>COMMERCIAL</b>      |                        | <b>MEDICAID</b>        |                        |
|                                                                     | <b>Number included</b> | <b>Number excluded</b> | <b>Number included</b> | <b>Number excluded</b> |
| Surgical procedure episodes between 12/01/2020 and 11/30/2021       | 1 444 304              |                        | 815 342                |                        |
| Age between 0 and 21                                                | 138 695                | 1 305 609              | 137 666                | 677 676                |
| Continuous enrollment from discharge to discharge +30 d             | 125 712                | 12 983                 | 132 677                | 4989                   |
| No surgical episodes in the 30 d before or after discharge          | 116 113                | 9599                   | 113 819                | 18 858                 |
| No hospitalizations in the 30 d after discharge                     | 113 623                | 2490                   | 110 484                | 3335                   |
| Length of stay after surgery >14 d                                  | 112 854                | 769                    | 108 695                | 1789                   |
| Discharged to home                                                  | 111 964                | 890                    | 107 884                | 811                    |
| Valid opioid prescription data                                      | 111 507                | 457                    | 107 496                | 388                    |

| <b>SUPPLEMENTAL TABLE 6</b> Full Results for Patients Aged 0–11 Years                  |                             |                               |                                          |                    |                            |                                    |
|----------------------------------------------------------------------------------------|-----------------------------|-------------------------------|------------------------------------------|--------------------|----------------------------|------------------------------------|
| <b>Procedure</b>                                                                       | <b>Number of procedures</b> | <b>Opioid dispensing rate</b> | <b>Mean MMEs per dispensed opioid Rx</b> | <b>Refill rate</b> | <b>Share of total MMEs</b> | <b>Share of surgical opioid Rx</b> |
| Tonsillectomy and/or adenoidectomy                                                     | 28 373                      | 19.9%                         | 27.6                                     | 1.0%               | 50.3%                      | 32.6%                              |
| Open treatment of fracture, upper extremity                                            | 1496                        | 51.5%                         | 54.9                                     | 0.7%               | 5.3%                       | 4.5%                               |
| Removal of implant; deep (eg, buried wire, pin, screw, metal band, nail, rod or plate) | 1494                        | 36.5%                         | 36.6                                     | 0.3%               | 3.5%                       | 3.2%                               |
| Osteotomy of lower extremity                                                           | 383                         | 65.3%                         | 105.6                                    | 4.4%               | 2.6%                       | 1.4%                               |
| Appendectomy - laparoscopic                                                            | 2898                        | 13.3%                         | 10.8                                     | 0.1%               | 2.0%                       | 2.2%                               |
| Epiphyseal or hemiepiphyseal arrest, lower extremity                                   | 291                         | 69.1%                         | 102.3                                    | 0.7%               | 1.9%                       | 1.2%                               |
| Orchiopexy                                                                             | 2745                        | 28.7%                         | 10.1                                     | 0.1%               | 1.8%                       | 4.5%                               |
| Plastic operation of penis to correct chordee or angulation                            | 2928                        | 25.6%                         | 7.8                                      | 0.1%               | 1.5%                       | 4.3%                               |
| Open treatment of fracture, lower extremity                                            | 317                         | 56.2%                         | 71.7                                     | 2.2%               | 1.5%                       | 1.0%                               |
| Arthroscopy of knee                                                                    | 211                         | 71.1%                         | 92.7                                     | 1.4%               | 1.3%                       | 0.9%                               |
| Open treatment of fracture, hip or pelvis                                              | 321                         | 52.3%                         | 59.9                                     | 2.8%               | 1.2%                       | 1.0%                               |
| Tympanoplasty                                                                          | 917                         | 21.8%                         | 19.4                                     | 0.1%               | 1.1%                       | 1.2%                               |
| Palatoplasty                                                                           | 614                         | 47.6%                         | 27.8                                     | 0.5%               | 1.1%                       | 1.7%                               |
| Arthrodesis of spine                                                                   | 149                         | 45.6%                         | 100.4                                    | 6.7%               | 1.0%                       | 0.4%                               |
| Tendon lengthening or shortening, lower extremity                                      | 377                         | 52.0%                         | 35.2                                     | 0.8%               | 0.9%                       | 1.1%                               |
| Excision of bone cyst or benign tumor with or without bone grafting                    | 182                         | 63.2%                         | 67.8                                     | 1.1%               | 0.8%                       | 0.7%                               |
| Hypospadias repair                                                                     | 1270                        | 37.0%                         | 8.3                                      | 0.2%               | 0.7%                       | 2.7%                               |
| Hernia repair, abdominal - open                                                        | 2597                        | 15.8%                         | 4.0                                      | 0.0%               | 0.7%                       | 2.4%                               |
| Skin graft                                                                             | 808                         | 23.3%                         | 12.1                                     | 1.0%               | 0.6%                       | 1.1%                               |
| Tendon transfer, lower extremity                                                       | 225                         | 69.3%                         | 40.3                                     | 2.2%               | 0.6%                       | 0.9%                               |
| Reconstruction of foot                                                                 | 55                          | 74.5%                         | 160.9                                    | 3.6%               | 0.6%                       | 0.2%                               |
| Graft of bone or cartilage to face                                                     | 516                         | 28.5%                         | 16.5                                     | 0.2%               | 0.5%                       | 0.8%                               |
| Hernia repair, inguinal/femoral - open                                                 | 2153                        | 11.7%                         | 3.7                                      | 0.0%               | 0.5%                       | 1.4%                               |
| Craniectomy or craniotomy                                                              | 420                         | 23.8%                         | 18.9                                     | 0.2%               | 0.5%                       | 0.6%                               |
| Strabismus surgery                                                                     | 5673                        | 4.5%                          | 1.4                                      | 0.0%               | 0.5%                       | 1.5%                               |
| Rhinoplasty                                                                            | 355                         | 33.8%                         | 21.3                                     | 0.3%               | 0.5%                       | 0.7%                               |
| Osteotomy of pelvis                                                                    | 119                         | 55.5%                         | 63.4                                     | 3.4%               | 0.5%                       | 0.4%                               |
| Repair of fistula, oronasal or oromaxillary                                            | 78                          | 56.4%                         | 94.7                                     | 0.0%               | 0.5%                       | 0.3%                               |
| Laminectomy/corpectomy                                                                 | 287                         | 31.0%                         | 23.6                                     | 0.0%               | 0.4%                       | 0.5%                               |
| Ureteroneocystostomy                                                                   | 300                         | 43.0%                         | 22.4                                     | 0.3%               | 0.4%                       | 0.7%                               |
| Reconstruction of nonunion or malunion, upper extremity                                | 58                          | 58.6%                         | 115.8                                    | 0.0%               | 0.4%                       | 0.2%                               |
| Flap reconstruction                                                                    | 406                         | 45.8%                         | 15.3                                     | 0.5%               | 0.4%                       | 1.1%                               |
| Osteotomy of upper extremity                                                           | 78                          | 60.3%                         | 73.0                                     | 0.0%               | 0.4%                       | 0.3%                               |
| Ligamentous reconstruction (augmentation), knee                                        | 33                          | 75.8%                         | 159.3                                    | 0.0%               | 0.3%                       | 0.1%                               |
| Adjacent tissue transfer or rearrangement                                              | 895                         | 13.9%                         | 5.8                                      | 0.0%               | 0.3%                       | 0.7%                               |
| Excision or destruction of lingual tonsil, any method (separate procedure)             | 75                          | 36.0%                         | 68.4                                     | 1.3%               | 0.3%                       | 0.2%                               |
| Tenotomy, lower extremity                                                              | 682                         | 14.5%                         | 7.5                                      | 0.0%               | 0.3%                       | 0.6%                               |
| Gastrocnemius recession                                                                | 94                          | 56.4%                         | 48.3                                     | 1.1%               | 0.3%                       | 0.3%                               |
| CSF shunt                                                                              | 334                         | 15.0%                         | 13.4                                     | 0.0%               | 0.3%                       | 0.3%                               |
| Excision or curettage of bone cyst or benign tumor                                     | 74                          | 59.5%                         | 57.8                                     | 2.7%               | 0.3%                       | 0.3%                               |
| Implantation, removal, or replacement of osseointegrated implant, temporal bone        | 82                          | 34.1%                         | 50.4                                     | 0.0%               | 0.3%                       | 0.2%                               |
| Excision of soft tissue lesion                                                         | 753                         | 7.6%                          | 5.5                                      | 0.1%               | 0.3%                       | 0.3%                               |
| Cleft lip repair                                                                       | 209                         | 42.1%                         | 18.7                                     | 0.0%               | 0.3%                       | 0.5%                               |
| Inferior turbinate resection or excision                                               | 252                         | 12.7%                         | 14.7                                     | 0.0%               | 0.2%                       | 0.2%                               |
| Ostectomy of foot and/or toes                                                          | 39                          | 64.1%                         | 94.7                                     | 0.0%               | 0.2%                       | 0.1%                               |
| Cochlear device implantation                                                           | 351                         | 20.5%                         | 10.0                                     | 0.3%               | 0.2%                       | 0.4%                               |
| Reinsertion of spinal fixation device                                                  | 68                          | 64.7%                         | 51.2                                     | 0.0%               | 0.2%                       | 0.3%                               |

**SUPPLEMENTAL TABLE 6** Continued

| <b>Procedure</b>                                                                                                 | <b>Number of procedures</b> | <b>Opioid dispensing rate</b> | <b>Mean MMEs per dispensed opioid Rx</b> | <b>Refill rate</b> | <b>Share of total MMEs</b> | <b>Share of surgical opioid Rx</b> |
|------------------------------------------------------------------------------------------------------------------|-----------------------------|-------------------------------|------------------------------------------|--------------------|----------------------------|------------------------------------|
| Repair of syndactyly                                                                                             | 168                         | 58.3%                         | 20.7                                     | 0.6%               | 0.2%                       | 0.6%                               |
| Lengthening of hamstring tendon                                                                                  | 72                          | 65.3%                         | 47.0                                     | 5.6%               | 0.2%                       | 0.3%                               |
| Trigger finger release                                                                                           | 642                         | 15.4%                         | 5.0                                      | 0.0%               | 0.2%                       | 0.6%                               |
| Open treatment of slipped femoral epiphysis                                                                      | 68                          | 61.8%                         | 46.5                                     | 0.0%               | 0.2%                       | 0.2%                               |
| Repair of blepharoptosis                                                                                         | 272                         | 8.5%                          | 11.5                                     | 0.0%               | 0.2%                       | 0.1%                               |
| Incision for implantation of cranial nerve (eg, vagus nerve) neurostimulator electrode array and pulse generator | 81                          | 32.1%                         | 35.9                                     | 0.0%               | 0.2%                       | 0.2%                               |
| Capsulotomy, foot and/or toes                                                                                    | 60                          | 53.3%                         | 46.1                                     | 1.7%               | 0.2%                       | 0.2%                               |
| Excision of facial bone or tumor/cyst in facial bone                                                             | 195                         | 27.7%                         | 13.9                                     | 0.0%               | 0.2%                       | 0.3%                               |
| Hernia repair, inguinal/femoral - laparoscopic                                                                   | 894                         | 6.9%                          | 3.0                                      | 0.1%               | 0.2%                       | 0.4%                               |
| Debridement of skin, muscle, or bone                                                                             | 239                         | 21.8%                         | 11.0                                     | 0.8%               | 0.2%                       | 0.3%                               |
| Excision of thyroglossal duct cyst or sinus                                                                      | 160                         | 15.6%                         | 16.4                                     | 0.0%               | 0.2%                       | 0.1%                               |
| Lengthening of palate                                                                                            | 35                          | 45.7%                         | 73.7                                     | 0.0%               | 0.2%                       | 0.1%                               |
| Cranioplasty                                                                                                     | 211                         | 32.2%                         | 11.7                                     | 0.0%               | 0.2%                       | 0.4%                               |
| Excision of hydrocele                                                                                            | 436                         | 19.5%                         | 5.5                                      | 0.0%               | 0.2%                       | 0.5%                               |
| Urethromeatoplasty                                                                                               | 793                         | 11.5%                         | 2.9                                      | 0.0%               | 0.1%                       | 0.5%                               |
| Excision of ganglion, wrist                                                                                      | 106                         | 50.0%                         | 21.1                                     | 0.0%               | 0.1%                       | 0.3%                               |
| Arthroscopy of elbow                                                                                             | 19                          | 52.6%                         | 109.3                                    | 0.0%               | 0.1%                       | 0.1%                               |
| Repair of atrial and/or ventricular septal defects                                                               | 371                         | 24.5%                         | 5.4                                      | 0.0%               | 0.1%                       | 0.5%                               |
| Nephrectomy - laparoscopic                                                                                       | 145                         | 40.0%                         | 13.4                                     | 0.7%               | 0.1%                       | 0.3%                               |
| Arthrotomy of lower extremity                                                                                    | 139                         | 23.0%                         | 13.0                                     | 0.7%               | 0.1%                       | 0.2%                               |
| Osteoplasty of lower extremity                                                                                   | 30                          | 56.7%                         | 58.7                                     | 6.7%               | 0.1%                       | 0.1%                               |
| Quadriicepsplasty (eg, Bennett or Thompson type)                                                                 | 10                          | 70.0%                         | 166.1                                    | 0.0%               | 0.1%                       | 0.0%                               |
| Reconstruction of face                                                                                           | 130                         | 34.6%                         | 12.5                                     | 0.0%               | 0.1%                       | 0.3%                               |
| Fasciectomy or fasciotomy                                                                                        | 28                          | 57.1%                         | 57.2                                     | 0.0%               | 0.1%                       | 0.1%                               |
| Pharyngoplasty                                                                                                   | 38                          | 31.6%                         | 42.0                                     | 2.6%               | 0.1%                       | 0.1%                               |
| Tendon repair, lower extremity                                                                                   | 25                          | 48.0%                         | 62.8                                     | 0.0%               | 0.1%                       | 0.1%                               |
| Reconstruction of toe                                                                                            | 176                         | 35.8%                         | 8.5                                      | 0.6%               | 0.1%                       | 0.4%                               |
| Appendectomy - open                                                                                              | 115                         | 20.0%                         | 13.0                                     | 0.0%               | 0.1%                       | 0.1%                               |
| Tendon repair, upper extremity                                                                                   | 53                          | 37.7%                         | 27.9                                     | 0.0%               | 0.1%                       | 0.1%                               |
| Tendon transfer, upper extremity                                                                                 | 35                          | 71.4%                         | 41.6                                     | 0.0%               | 0.1%                       | 0.1%                               |
| Hand tendon repair                                                                                               | 66                          | 37.9%                         | 22.0                                     | 0.0%               | 0.1%                       | 0.1%                               |
| Reconstruction of dislocating patella                                                                            | 17                          | 70.6%                         | 82.8                                     | 0.0%               | 0.1%                       | 0.1%                               |
| Cholecystectomy - laparoscopic                                                                                   | 98                          | 21.4%                         | 14.0                                     | 1.0%               | 0.1%                       | 0.1%                               |
| Excision of extraparenchymal lesion of testis                                                                    | 231                         | 19.0%                         | 5.8                                      | 0.0%               | 0.1%                       | 0.3%                               |
| Nerve repair                                                                                                     | 79                          | 27.8%                         | 16.9                                     | 2.5%               | 0.1%                       | 0.1%                               |
| Division of aberrant vessel (vascular ring)                                                                      | 75                          | 33.3%                         | 17.7                                     | 0.0%               | 0.1%                       | 0.1%                               |
| Orchiectomy - laparoscopic                                                                                       | 222                         | 23.0%                         | 6.0                                      | 0.0%               | 0.1%                       | 0.3%                               |
| Excision of epiphyseal bar                                                                                       | 13                          | 46.2%                         | 100.0                                    | 0.0%               | 0.1%                       | 0.0%                               |
| Bone resection                                                                                                   | 57                          | 35.1%                         | 22.8                                     | 0.0%               | 0.1%                       | 0.1%                               |
| Arthroscopy of ankle or foot                                                                                     | 17                          | 47.1%                         | 74.4                                     | 0.0%               | 0.1%                       | 0.0%                               |
| Application of external fixation system                                                                          | 49                          | 44.9%                         | 25.8                                     | 6.1%               | 0.1%                       | 0.1%                               |
| Pyeloplasty                                                                                                      | 144                         | 23.6%                         | 8.4                                      | 0.0%               | 0.1%                       | 0.2%                               |
| Prophylactic treatment (nailing, pinning, plating or wiring) of bone, lower extremity                            | 26                          | 46.2%                         | 46.0                                     | 3.8%               | 0.1%                       | 0.1%                               |
| Nerve decompression                                                                                              | 51                          | 45.1%                         | 23.1                                     | 0.0%               | 0.1%                       | 0.1%                               |
| Excision of lesion, tendon, tendon sheath, or capsule; foot                                                      | 31                          | 19.4%                         | 36.9                                     | 0.0%               | 0.1%                       | 0.0%                               |
| Reconstruction of congenital hand polydactyly                                                                    | 225                         | 13.8%                         | 5.1                                      | 0.0%               | 0.1%                       | 0.2%                               |
| Lymphadenectomy                                                                                                  | 38                          | 23.7%                         | 30.0                                     | 0.0%               | 0.1%                       | 0.1%                               |
| Epiphyseal arrest by epiphysiodesis or stapling, greater trochanter of femur                                     | 11                          | 45.5%                         | 97.3                                     | 0.0%               | 0.1%                       | 0.0%                               |

**SUPPLEMENTAL TABLE 6** Continued

| <b>Procedure</b>                                                                                                  | <b>Number of procedures</b> | <b>Opioid dispensing rate</b> | <b>Mean MMEs per dispensed opioid Rx</b> | <b>Refill rate</b> | <b>Share of total MMEs</b> | <b>Share of surgical opioid Rx</b> |
|-------------------------------------------------------------------------------------------------------------------|-----------------------------|-------------------------------|------------------------------------------|--------------------|----------------------------|------------------------------------|
| Repair of nonunion or malunion, foot bones                                                                        | 2                           | 50.0%                         | 525.0                                    | 0.0%               | 0.1%                       | 0.0%                               |
| Open treatment of facial fractures                                                                                | 59                          | 28.8%                         | 17.5                                     | 0.0%               | 0.1%                       | 0.1%                               |
| Nephrectomy - open                                                                                                | 71                          | 38.0%                         | 14.0                                     | 2.8%               | 0.1%                       | 0.2%                               |
| Tympanostomy                                                                                                      | 23 280                      | 0.7%                          | 0.0                                      | 0.0%               | 0.1%                       | 0.9%                               |
| Correction of hallux rigidus                                                                                      | 27                          | 37.0%                         | 33.7                                     | 3.7%               | 0.1%                       | 0.1%                               |
| Arthrodesis of lower extremity                                                                                    | 22                          | 36.4%                         | 41.4                                     | 0.0%               | 0.1%                       | 0.0%                               |
| Reconstruction of nonunion or malunion, lower extremity                                                           | 11                          | 54.5%                         | 82.7                                     | 9.1%               | 0.1%                       | 0.0%                               |
| Pancreatectomy                                                                                                    | 7                           | 14.3%                         | 128.6                                    | 0.0%               | 0.1%                       | 0.0%                               |
| Intestinal procedure, resection and anastomosis - open                                                            | 106                         | 4.7%                          | 8.4                                      | 0.0%               | 0.1%                       | 0.0%                               |
| Amputation of upper extremity                                                                                     | 78                          | 28.2%                         | 11.0                                     | 1.3%               | 0.1%                       | 0.1%                               |
| Frenoplasty                                                                                                       | 617                         | 2.4%                          | 1.4                                      | 0.0%               | 0.1%                       | 0.1%                               |
| Orchiectomy - open                                                                                                | 209                         | 20.6%                         | 4.0                                      | 0.0%               | 0.1%                       | 0.2%                               |
| Intestinal procedure, ileostomy or jejunostomy                                                                    | 18                          | 5.6%                          | 45.8                                     | 0.0%               | 0.1%                       | 0.0%                               |
| Amputation of lower extremity                                                                                     | 36                          | 41.7%                         | 22.8                                     | 2.8%               | 0.1%                       | 0.1%                               |
| Tricuspid or Mitral valve repair/reconstruction - open                                                            | 76                          | 30.3%                         | 10.7                                     | 0.0%               | 0.1%                       | 0.1%                               |
| Tissue expander placement, excluding breast                                                                       | 40                          | 55.0%                         | 20.3                                     | 0.0%               | 0.1%                       | 0.1%                               |
| Fixation of contralateral testis                                                                                  | 114                         | 28.9%                         | 6.9                                      | 0.0%               | 0.1%                       | 0.2%                               |
| Reconstruction of external auditory canal                                                                         | 27                          | 44.4%                         | 28.4                                     | 0.0%               | 0.0%                       | 0.1%                               |
| Implantable cardiac device procedures                                                                             | 69                          | 29.0%                         | 10.8                                     | 1.4%               | 0.0%                       | 0.1%                               |
| Cutaneous appendico-vesicostomy                                                                                   | 35                          | 25.7%                         | 20.3                                     | 2.9%               | 0.0%                       | 0.1%                               |
| Bone graft procedure                                                                                              | 22                          | 50.0%                         | 32.0                                     | 0.0%               | 0.0%                       | 0.1%                               |
| Repair of complex cardiac anomalies                                                                               | 100                         | 23.0%                         | 7.0                                      | 2.0%               | 0.0%                       | 0.1%                               |
| Resection of bone tumor                                                                                           | 5                           | 100.0%                        | 136.8                                    | 0.0%               | 0.0%                       | 0.0%                               |
| Suture of quadriceps or hamstring muscle rupture                                                                  | 5                           | 80.0%                         | 136.8                                    | 20.0%              | 0.0%                       | 0.0%                               |
| Exploration of penetrating wound                                                                                  | 92                          | 10.9%                         | 7.0                                      | 1.1%               | 0.0%                       | 0.1%                               |
| Reduction of torsion of testis                                                                                    | 69                          | 27.5%                         | 9.2                                      | 0.0%               | 0.0%                       | 0.1%                               |
| Scapulopexy                                                                                                       | 3                           | 66.7%                         | 210.0                                    | 0.0%               | 0.0%                       | 0.0%                               |
| Osteoplasty of upper extremity                                                                                    | 12                          | 66.7%                         | 52.1                                     | 0.0%               | 0.0%                       | 0.0%                               |
| Excision of branchial cleft cyst, vestige, or fistula                                                             | 191                         | 8.4%                          | 3.2                                      | 0.0%               | 0.0%                       | 0.1%                               |
| Repair or reconstruction of collateral ligament, hand and/or fingers                                              | 29                          | 51.7%                         | 20.3                                     | 0.0%               | 0.0%                       | 0.1%                               |
| Laryngoscopy, with tumor excision, with or without reconstruction                                                 | 444                         | 2.9%                          | 1.3                                      | 0.0%               | 0.0%                       | 0.1%                               |
| Urethroplasty                                                                                                     | 38                          | 39.5%                         | 15.4                                     | 0.0%               | 0.0%                       | 0.1%                               |
| Excision of lesion of tendon sheath or joint capsule, hand or finger                                              | 37                          | 21.6%                         | 15.4                                     | 0.0%               | 0.0%                       | 0.0%                               |
| Capsulorrhaphy or reconstruction, wrist                                                                           | 3                           | 66.7%                         | 188.3                                    | 0.0%               | 0.0%                       | 0.0%                               |
| Laparoscopic fulguration or excision of lesions of the ovary, pelvic viscera, or peritoneal surface by any method | 44                          | 29.5%                         | 12.8                                     | 2.3%               | 0.0%                       | 0.1%                               |
| Excision of salivary tumor or salivary gland                                                                      | 73                          | 15.1%                         | 7.7                                      | 0.0%               | 0.0%                       | 0.1%                               |
| Removal of instrumentation in spine                                                                               | 15                          | 73.3%                         | 36.9                                     | 0.0%               | 0.0%                       | 0.1%                               |
| Biopsy or excision of lymph node(s)                                                                               | 186                         | 7.5%                          | 3.0                                      | 0.5%               | 0.0%                       | 0.1%                               |
| Resection or incision of subvalvular tissue for discrete subvalvular aortic stenosis                              | 45                          | 40.0%                         | 12.1                                     | 0.0%               | 0.0%                       | 0.1%                               |
| Acetabuloplasty                                                                                                   | 18                          | 66.7%                         | 30.0                                     | 0.0%               | 0.0%                       | 0.1%                               |
| Repair of disrupted ligament, ankle                                                                               | 5                           | 80.0%                         | 107.5                                    | 0.0%               | 0.0%                       | 0.0%                               |
| Radical resection of tumor, bone                                                                                  | 1                           | 100.0%                        | 525.0                                    | 100.0%             | 0.0%                       | 0.0%                               |
| Radical resection of tumor, soft tissue                                                                           | 48                          | 22.9%                         | 9.5                                      | 0.0%               | 0.0%                       | 0.1%                               |
| Mastoidectomy                                                                                                     | 27                          | 22.2%                         | 16.5                                     | 0.0%               | 0.0%                       | 0.0%                               |
| Excision of lesion, cornea (keratectomy, lamellar, partial), except pterygium                                     | 20                          | 30.0%                         | 22.1                                     | 0.0%               | 0.0%                       | 0.0%                               |

**SUPPLEMENTAL TABLE 6** Continued

| <b>Procedure</b>                                                                                                   | <b>Number of procedures</b> | <b>Opioid dispensing rate</b> | <b>Mean MMEs per dispensed opioid Rx</b> | <b>Refill rate</b> | <b>Share of total MMEs</b> | <b>Share of surgical opioid Rx</b> |
|--------------------------------------------------------------------------------------------------------------------|-----------------------------|-------------------------------|------------------------------------------|--------------------|----------------------------|------------------------------------|
| Repair of tunica vaginalis hydrocele                                                                               | 75                          | 22.7%                         | 5.7                                      | 0.0%               | 0.0%                       | 0.1%                               |
| Fracture of nasal inferior turbinate(s)                                                                            | 219                         | 5.0%                          | 1.9                                      | 0.0%               | 0.0%                       | 0.1%                               |
| Graft of fat or other tissue                                                                                       | 147                         | 4.8%                          | 2.8                                      | 0.0%               | 0.0%                       | 0.0%                               |
| Tenolysis, upper extremity                                                                                         | 23                          | 39.1%                         | 17.8                                     | 0.0%               | 0.0%                       | 0.1%                               |
| Palatopharyngoplasty                                                                                               | 9                           | 22.2%                         | 45.0                                     | 0.0%               | 0.0%                       | 0.0%                               |
| Excision of frenum, labial or buccal                                                                               | 2202                        | 0.5%                          | 0.2                                      | 0.0%               | 0.0%                       | 0.1%                               |
| Laparoscopic intestinal procedure                                                                                  | 62                          | 11.3%                         | 6.4                                      | 0.0%               | 0.0%                       | 0.0%                               |
| Closure of cystostomy                                                                                              | 13                          | 53.8%                         | 29.9                                     | 0.0%               | 0.0%                       | 0.0%                               |
| Salpingo-oophorectomy                                                                                              | 3                           | 33.3%                         | 125.0                                    | 0.0%               | 0.0%                       | 0.0%                               |
| Removal of implantable defibrillator pulse generator with replacement of implantable defibrillator pulse generator | 2                           | 100.0%                        | 187.5                                    | 0.0%               | 0.0%                       | 0.0%                               |
| Pollicization of a digit                                                                                           | 12                          | 50.0%                         | 30.5                                     | 0.0%               | 0.0%                       | 0.0%                               |
| Excision of synovial cyst of popliteal space                                                                       | 4                           | 75.0%                         | 90.0                                     | 0.0%               | 0.0%                       | 0.0%                               |
| Tarsal tunnel release                                                                                              | 3                           | 100.0%                        | 114.0                                    | 0.0%               | 0.0%                       | 0.0%                               |
| Enucleation of eye                                                                                                 | 23                          | 21.7%                         | 14.8                                     | 0.0%               | 0.0%                       | 0.0%                               |
| Capsulectomy or capsulotomy, hand                                                                                  | 13                          | 61.5%                         | 25.9                                     | 0.0%               | 0.0%                       | 0.0%                               |
| Cutaneous vesicostomy                                                                                              | 31                          | 32.3%                         | 10.8                                     | 3.2%               | 0.0%                       | 0.1%                               |
| Scrotoplasty                                                                                                       | 106                         | 13.2%                         | 3.2                                      | 0.0%               | 0.0%                       | 0.1%                               |
| Colectomy and/or proctectomy - open                                                                                | 96                          | 5.2%                          | 3.4                                      | 0.0%               | 0.0%                       | 0.0%                               |
| Incision of bone cortex, shoulder and upper extremity                                                              | 9                           | 22.2%                         | 36.1                                     | 0.0%               | 0.0%                       | 0.0%                               |
| Shunt; superior vena cava to pulmonary artery for flow to both lungs (bidirectional Glenn procedure)               | 58                          | 24.1%                         | 5.6                                      | 0.0%               | 0.0%                       | 0.1%                               |
| Decompression fasciotomy of lower extremity                                                                        | 6                           | 83.3%                         | 53.2                                     | 0.0%               | 0.0%                       | 0.0%                               |
| Division of sternocleidomastoid                                                                                    | 14                          | 14.3%                         | 22.5                                     | 0.0%               | 0.0%                       | 0.0%                               |
| Oophrectomy                                                                                                        | 4                           | 25.0%                         | 75.0                                     | 0.0%               | 0.0%                       | 0.0%                               |
| Incision and drainage, thigh or knee region                                                                        | 36                          | 11.1%                         | 7.9                                      | 0.0%               | 0.0%                       | 0.0%                               |
| Transfer of tendon of fingers                                                                                      | 3                           | 100.0%                        | 92.5                                     | 0.0%               | 0.0%                       | 0.0%                               |
| Orbitotomy                                                                                                         | 163                         | 6.1%                          | 1.7                                      | 0.0%               | 0.0%                       | 0.1%                               |
| Excision of local lesion of epididymis                                                                             | 70                          | 20.0%                         | 3.9                                      | 0.0%               | 0.0%                       | 0.1%                               |
| Open treatment of clavicle fracture                                                                                | 17                          | 17.6%                         | 16.2                                     | 0.0%               | 0.0%                       | 0.0%                               |
| Dacryocystorhinostomy                                                                                              | 12                          | 16.7%                         | 22.5                                     | 0.0%               | 0.0%                       | 0.0%                               |
| Exploration of spinal fusion                                                                                       | 5                           | 80.0%                         | 52.9                                     | 0.0%               | 0.0%                       | 0.0%                               |
| Excision of lip                                                                                                    | 42                          | 11.9%                         | 6.1                                      | 0.0%               | 0.0%                       | 0.0%                               |
| Excision of lesion of mucosa and submucosa, vestibule of mouth                                                     | 39                          | 10.3%                         | 6.5                                      | 0.0%               | 0.0%                       | 0.0%                               |
| Hysterectomy - laparoscopic or vaginal                                                                             | 31                          | 6.5%                          | 8.2                                      | 0.0%               | 0.0%                       | 0.0%                               |
| Arthrotomy of upper extremity                                                                                      | 38                          | 18.4%                         | 6.7                                      | 0.0%               | 0.0%                       | 0.0%                               |
| Laryngoplasty                                                                                                      | 29                          | 6.9%                          | 8.7                                      | 0.0%               | 0.0%                       | 0.0%                               |
| Prophylactic treatment (nailing, pinning, plating or wiring) of bone, upper extremity                              | 3                           | 66.7%                         | 82.8                                     | 0.0%               | 0.0%                       | 0.0%                               |
| Tenolysis, lower extremity                                                                                         | 7                           | 57.1%                         | 35.4                                     | 0.0%               | 0.0%                       | 0.0%                               |
| Osteotomy of facial bones                                                                                          | 10                          | 50.0%                         | 24.6                                     | 0.0%               | 0.0%                       | 0.0%                               |
| Excision of pilonidal cyst or sinus                                                                                | 10                          | 20.0%                         | 24.0                                     | 0.0%               | 0.0%                       | 0.0%                               |
| Aortic valve repair/replacement - open                                                                             | 24                          | 33.3%                         | 9.7                                      | 0.0%               | 0.0%                       | 0.0%                               |
| Pulmonary valve repair/replacement - open                                                                          | 30                          | 23.3%                         | 7.5                                      | 0.0%               | 0.0%                       | 0.0%                               |
| Arthroscopy of shoulder                                                                                            | 4                           | 25.0%                         | 56.3                                     | 0.0%               | 0.0%                       | 0.0%                               |
| Stapedectomy or stapedotomy                                                                                        | 7                           | 28.6%                         | 31.8                                     | 0.0%               | 0.0%                       | 0.0%                               |
| Lateral retinacular release - open                                                                                 | 8                           | 62.5%                         | 27.6                                     | 0.0%               | 0.0%                       | 0.0%                               |
| Removal of tissue expander(s) without insertion of prosthesis                                                      | 13                          | 38.5%                         | 16.3                                     | 0.0%               | 0.0%                       | 0.0%                               |
| Arterial bypass                                                                                                    | 7                           | 42.9%                         | 29.7                                     | 0.0%               | 0.0%                       | 0.0%                               |

**SUPPLEMENTAL TABLE 6** Continued

| <b>Procedure</b>                                                                                                            | <b>Number of procedures</b> | <b>Opioid dispensing rate</b> | <b>Mean MMEs per dispensed opioid Rx</b> | <b>Refill rate</b> | <b>Share of total MMEs</b> | <b>Share of surgical opioid Rx</b> |
|-----------------------------------------------------------------------------------------------------------------------------|-----------------------------|-------------------------------|------------------------------------------|--------------------|----------------------------|------------------------------------|
| Laparoscopic gastrostomy, without construction of gastric tube                                                              | 656                         | 1.7%                          | 0.3                                      | 0.0%               | 0.0%                       | 0.1%                               |
| Colostomy - laparoscopic                                                                                                    | 26                          | 11.5%                         | 7.8                                      | 0.0%               | 0.0%                       | 0.0%                               |
| Lipectomy, with or without excessive skin removal                                                                           | 12                          | 50.0%                         | 16.5                                     | 0.0%               | 0.0%                       | 0.0%                               |
| Osteotomy of clavicle                                                                                                       | 3                           | 66.7%                         | 65.0                                     | 0.0%               | 0.0%                       | 0.0%                               |
| Coronoidectomy                                                                                                              | 3                           | 66.7%                         | 63.0                                     | 33.3%              | 0.0%                       | 0.0%                               |
| Thoracotomy, with exploration                                                                                               | 1                           | 100.0%                        | 187.5                                    | 0.0%               | 0.0%                       | 0.0%                               |
| Arthrodesis of upper extremity                                                                                              | 10                          | 40.0%                         | 18.0                                     | 0.0%               | 0.0%                       | 0.0%                               |
| Arthroscopy of hip                                                                                                          | 4                           | 50.0%                         | 45.0                                     | 0.0%               | 0.0%                       | 0.0%                               |
| Excision of breast lesion                                                                                                   | 25                          | 12.0%                         | 6.8                                      | 0.0%               | 0.0%                       | 0.0%                               |
| Intracranial arteriovenous malformation repair                                                                              | 18                          | 22.2%                         | 9.3                                      | 0.0%               | 0.0%                       | 0.0%                               |
| Repair of retinal detachment                                                                                                | 63                          | 4.8%                          | 2.7                                      | 0.0%               | 0.0%                       | 0.0%                               |
| Tetralogy of Fallot repair                                                                                                  | 40                          | 15.0%                         | 4.2                                      | 0.0%               | 0.0%                       | 0.0%                               |
| Epiphyseal arrest by epiphysiodesis or stapling; distal radius and/or ulna                                                  | 4                           | 50.0%                         | 41.6                                     | 0.0%               | 0.0%                       | 0.0%                               |
| Arthroplasty of forearm or hand                                                                                             | 6                           | 83.3%                         | 27.1                                     | 0.0%               | 0.0%                       | 0.0%                               |
| Conjunctival flap                                                                                                           | 31                          | 22.6%                         | 5.2                                      | 0.0%               | 0.0%                       | 0.0%                               |
| Repair of atrioventricular canal                                                                                            | 66                          | 19.7%                         | 2.4                                      | 0.0%               | 0.0%                       | 0.1%                               |
| Insertion of testicular prosthesis                                                                                          | 2                           | 100.0%                        | 80.3                                     | 0.0%               | 0.0%                       | 0.0%                               |
| Ureteroureterostomy                                                                                                         | 20                          | 30.0%                         | 7.6                                      | 0.0%               | 0.0%                       | 0.0%                               |
| Decompression fasciotomy of upper extremity                                                                                 | 5                           | 40.0%                         | 30.0                                     | 0.0%               | 0.0%                       | 0.0%                               |
| Arthroplasty of temporomandibular joint                                                                                     | 2                           | 50.0%                         | 75.0                                     | 0.0%               | 0.0%                       | 0.0%                               |
| Tenodesis, hand                                                                                                             | 2                           | 50.0%                         | 75.0                                     | 0.0%               | 0.0%                       | 0.0%                               |
| Osteochondral allograft, knee - open                                                                                        | 1                           | 100.0%                        | 150.0                                    | 0.0%               | 0.0%                       | 0.0%                               |
| Repair of ruptured musculotendinous cuff - open                                                                             | 1                           | 100.0%                        | 150.0                                    | 0.0%               | 0.0%                       | 0.0%                               |
| Splenectomy - laparoscopic                                                                                                  | 30                          | 16.7%                         | 4.9                                      | 0.0%               | 0.0%                       | 0.0%                               |
| Muscle transfer, upper extremity                                                                                            | 9                           | 55.6%                         | 16.1                                     | 0.0%               | 0.0%                       | 0.0%                               |
| Suture of infrapatellar tendon                                                                                              | 6                           | 50.0%                         | 24.0                                     | 0.0%               | 0.0%                       | 0.0%                               |
| Lung resection                                                                                                              | 40                          | 20.0%                         | 3.6                                      | 0.0%               | 0.0%                       | 0.0%                               |
| Closure of enterostomy                                                                                                      | 35                          | 17.1%                         | 4.1                                      | 0.0%               | 0.0%                       | 0.0%                               |
| Thyroidectomy, with or without lymphadenectomy                                                                              | 17                          | 17.6%                         | 8.3                                      | 0.0%               | 0.0%                       | 0.0%                               |
| Secondary closure of surgical wound or dehiscence                                                                           | 30                          | 20.0%                         | 4.7                                      | 0.0%               | 0.0%                       | 0.0%                               |
| Repair of ruptured Achilles tendon                                                                                          | 4                           | 50.0%                         | 35.0                                     | 0.0%               | 0.0%                       | 0.0%                               |
| Arthroplasty of knee                                                                                                        | 2                           | 50.0%                         | 70.0                                     | 0.0%               | 0.0%                       | 0.0%                               |
| Breast implant                                                                                                              | 2                           | 50.0%                         | 70.0                                     | 0.0%               | 0.0%                       | 0.0%                               |
| Excision of coarctation of aorta                                                                                            | 68                          | 11.8%                         | 2.0                                      | 0.0%               | 0.0%                       | 0.0%                               |
| Insertion or replacement of peripheral or gastric neurostimulator pulse generator or receiver; direct or inductive coupling | 4                           | 75.0%                         | 34.5                                     | 0.0%               | 0.0%                       | 0.0%                               |
| Excision of tendon of hand or finger                                                                                        | 3                           | 100.0%                        | 44.2                                     | 0.0%               | 0.0%                       | 0.0%                               |
| Removal of implant; superficial (eg, buried wire, pin or rod)                                                               | 456                         | 1.1%                          | 0.3                                      | 0.0%               | 0.0%                       | 0.0%                               |
| Surgical closure tracheostomy or fistula, with or without plastic repair                                                    | 109                         | 3.7%                          | 1.2                                      | 0.9%               | 0.0%                       | 0.0%                               |
| Revision of urinary-cutaneous anastomosis                                                                                   | 17                          | 35.3%                         | 7.7                                      | 0.0%               | 0.0%                       | 0.0%                               |
| Direct or patch closure, sinus venosus, with or without anomalous pulmonary venous drainage                                 | 18                          | 27.8%                         | 7.2                                      | 0.0%               | 0.0%                       | 0.0%                               |
| Uvulectomy, excision of uvula                                                                                               | 6                           | 33.3%                         | 21.5                                     | 0.0%               | 0.0%                       | 0.0%                               |
| Removal of implanted material, eye                                                                                          | 12                          | 16.7%                         | 10.5                                     | 0.0%               | 0.0%                       | 0.0%                               |
| Elevation of depressed skull fracture                                                                                       | 24                          | 16.7%                         | 5.2                                      | 0.0%               | 0.0%                       | 0.0%                               |
| Laparoscopic bladder procedure                                                                                              | 6                           | 33.3%                         | 20.7                                     | 0.0%               | 0.0%                       | 0.0%                               |
| Enterolysis - open                                                                                                          | 28                          | 7.1%                          | 4.4                                      | 0.0%               | 0.0%                       | 0.0%                               |

**SUPPLEMENTAL TABLE 6** Continued

| <b>Procedure</b>                                                                        | <b>Number of procedures</b> | <b>Opioid dispensing rate</b> | <b>Mean MMEs per dispensed opioid Rx</b> | <b>Refill rate</b> | <b>Share of total MMEs</b> | <b>Share of surgical opioid Rx</b> |
|-----------------------------------------------------------------------------------------|-----------------------------|-------------------------------|------------------------------------------|--------------------|----------------------------|------------------------------------|
| Glossectomy                                                                             | 9                           | 33.3%                         | 13.6                                     | 0.0%               | 0.0%                       | 0.0%                               |
| Resection of palate or extensive resection of lesion                                    | 2                           | 50.0%                         | 60.0                                     | 0.0%               | 0.0%                       | 0.0%                               |
| Repair of cleft hand                                                                    | 9                           | 66.7%                         | 13.1                                     | 0.0%               | 0.0%                       | 0.0%                               |
| Excision of lesion of tendon sheath or capsule (eg, cyst or ganglion), leg and/or ankle | 6                           | 50.0%                         | 19.4                                     | 0.0%               | 0.0%                       | 0.0%                               |
| Open treatment of spinal fracture                                                       | 6                           | 33.3%                         | 19.0                                     | 0.0%               | 0.0%                       | 0.0%                               |
| Aortoplasty (gusset) for supravalvular stenosis                                         | 6                           | 66.7%                         | 18.9                                     | 0.0%               | 0.0%                       | 0.0%                               |
| Liver resection                                                                         | 6                           | 50.0%                         | 18.8                                     | 0.0%               | 0.0%                       | 0.0%                               |
| Repair of eye laceration                                                                | 36                          | 11.1%                         | 3.1                                      | 0.0%               | 0.0%                       | 0.0%                               |
| Plastic repair of introitus                                                             | 7                           | 85.7%                         | 16.0                                     | 14.3%              | 0.0%                       | 0.0%                               |
| Centralization of wrist on ulna                                                         | 9                           | 55.6%                         | 12.2                                     | 0.0%               | 0.0%                       | 0.0%                               |
| Excision of urachal cyst or sinus                                                       | 63                          | 9.5%                          | 1.7                                      | 0.0%               | 0.0%                       | 0.0%                               |
| Cystotomy or cystostomy                                                                 | 35                          | 14.3%                         | 3.1                                      | 0.0%               | 0.0%                       | 0.0%                               |
| Hernia repair, abdominal - laparoscopic                                                 | 74                          | 6.8%                          | 1.4                                      | 0.0%               | 0.0%                       | 0.0%                               |
| Repair of isolated partial anomalous pulmonary venous return (eg, Scimitar Syndrome)    | 8                           | 37.5%                         | 13.3                                     | 0.0%               | 0.0%                       | 0.0%                               |
| Excision of neuroma, neurofibroma, or neurolemmoma                                      | 82                          | 3.7%                          | 1.2                                      | 0.0%               | 0.0%                       | 0.0%                               |
| Plastic operation of penis for injury                                                   | 8                           | 25.0%                         | 12.5                                     | 0.0%               | 0.0%                       | 0.0%                               |
| Omentectomy, epiploectomy, resection of omentum                                         | 6                           | 33.3%                         | 16.7                                     | 0.0%               | 0.0%                       | 0.0%                               |
| Excision of spermatocele, with or without epididymectomy                                | 1                           | 100.0%                        | 100.0                                    | 0.0%               | 0.0%                       | 0.0%                               |
| Reconstructive repair of pectus excavatum or carinatum                                  | 4                           | 25.0%                         | 24.8                                     | 0.0%               | 0.0%                       | 0.0%                               |
| Laparoscopic abdominal procedure                                                        | 57                          | 5.3%                          | 1.7                                      | 0.0%               | 0.0%                       | 0.0%                               |
| Splenectomy - open                                                                      | 6                           | 33.3%                         | 16.3                                     | 0.0%               | 0.0%                       | 0.0%                               |
| Rib excision                                                                            | 4                           | 50.0%                         | 24.4                                     | 0.0%               | 0.0%                       | 0.0%                               |
| Neuroendoscopy, intracranial                                                            | 54                          | 5.6%                          | 1.8                                      | 0.0%               | 0.0%                       | 0.0%                               |
| Ventriculomyotomy (-myectomy) for idiopathic hypertrophic subaortic stenosis            | 9                           | 33.3%                         | 10.7                                     | 0.0%               | 0.0%                       | 0.0%                               |
| Repair of entropion                                                                     | 49                          | 6.1%                          | 1.9                                      | 0.0%               | 0.0%                       | 0.0%                               |
| Colporrhaphy                                                                            | 23                          | 8.7%                          | 4.1                                      | 0.0%               | 0.0%                       | 0.0%                               |
| Gastrostomy                                                                             | 44                          | 6.8%                          | 2.1                                      | 0.0%               | 0.0%                       | 0.0%                               |
| Ventriculocisternostomy, third ventricle                                                | 44                          | 2.3%                          | 2.0                                      | 0.0%               | 0.0%                       | 0.0%                               |
| Excision of dermoid cyst, nose                                                          | 18                          | 11.1%                         | 5.0                                      | 0.0%               | 0.0%                       | 0.0%                               |
| Aortic reconstruction/repair                                                            | 9                           | 33.3%                         | 10.0                                     | 0.0%               | 0.0%                       | 0.0%                               |
| Canthoplasty                                                                            | 7                           | 14.3%                         | 12.9                                     | 0.0%               | 0.0%                       | 0.0%                               |
| Tenotomy, upper extremity                                                               | 6                           | 33.3%                         | 15.0                                     | 0.0%               | 0.0%                       | 0.0%                               |
| Sinusotomy, with or without reconstruction                                              | 3                           | 33.3%                         | 30.0                                     | 0.0%               | 0.0%                       | 0.0%                               |
| Excision of lesion or tumor, dentoalveolar structures                                   | 2                           | 50.0%                         | 45.0                                     | 0.0%               | 0.0%                       | 0.0%                               |
| Arthroscopy of wrist                                                                    | 1                           | 100.0%                        | 90.0                                     | 0.0%               | 0.0%                       | 0.0%                               |
| Repair of dural/cerebrospinal fluid leak, not requiring laminectomy                     | 1                           | 100.0%                        | 90.0                                     | 0.0%               | 0.0%                       | 0.0%                               |
| Vaginectomy                                                                             | 1                           | 100.0%                        | 90.0                                     | 0.0%               | 0.0%                       | 0.0%                               |
| Incision of bone cortex, pelvis and lower extremity                                     | 39                          | 7.7%                          | 2.3                                      | 0.0%               | 0.0%                       | 0.0%                               |
| Application of halo, including removal                                                  | 12                          | 25.0%                         | 7.3                                      | 0.0%               | 0.0%                       | 0.0%                               |
| Cataract removal                                                                        | 147                         | 3.4%                          | 0.6                                      | 0.0%               | 0.0%                       | 0.0%                               |
| Varicocele repair                                                                       | 8                           | 37.5%                         | 10.2                                     | 0.0%               | 0.0%                       | 0.0%                               |
| Incision and drainage of abscess in posterior spine                                     | 3                           | 33.3%                         | 26.8                                     | 0.0%               | 0.0%                       | 0.0%                               |
| Ovarian cystectomy                                                                      | 7                           | 42.9%                         | 11.0                                     | 0.0%               | 0.0%                       | 0.0%                               |
| Incision and drainage, pelvis or hip joint area                                         | 11                          | 9.1%                          | 6.8                                      | 0.0%               | 0.0%                       | 0.0%                               |
| Vermilionectomy, with mucosal advancement                                               | 3                           | 33.3%                         | 25.0                                     | 0.0%               | 0.0%                       | 0.0%                               |
| Repair of arteriovenous fistula, congenital                                             | 2                           | 50.0%                         | 37.5                                     | 0.0%               | 0.0%                       | 0.0%                               |
| Thrombectomy or thrombolysis, percutaneous intracranial                                 | 2                           | 50.0%                         | 37.5                                     | 0.0%               | 0.0%                       | 0.0%                               |
| Nerve transection                                                                       | 6                           | 66.7%                         | 12.4                                     | 0.0%               | 0.0%                       | 0.0%                               |

**SUPPLEMENTAL TABLE 6** Continued

| <b>Procedure</b>                                                                                       | <b>Number of procedures</b> | <b>Opioid dispensing rate</b> | <b>Mean MMEs per dispensed opioid Rx</b> | <b>Refill rate</b> | <b>Share of total MMEs</b> | <b>Share of surgical opioid Rx</b> |
|--------------------------------------------------------------------------------------------------------|-----------------------------|-------------------------------|------------------------------------------|--------------------|----------------------------|------------------------------------|
| Repair of patent ductus arteriosus                                                                     | 44                          | 20.5%                         | 1.6                                      | 0.0%               | 0.0%                       | 0.1%                               |
| Arterial transposition                                                                                 | 4                           | 50.0%                         | 17.5                                     | 0.0%               | 0.0%                       | 0.0%                               |
| Repair of imperforate anus                                                                             | 105                         | 1.9%                          | 0.6                                      | 0.0%               | 0.0%                       | 0.0%                               |
| Umbilectomy, omphalectomy, excision of umbilicus                                                       | 35                          | 8.6%                          | 1.9                                      | 0.0%               | 0.0%                       | 0.0%                               |
| Laparoscopic ovarian procedure                                                                         | 13                          | 7.7%                          | 5.2                                      | 0.0%               | 0.0%                       | 0.0%                               |
| Alveoplasty                                                                                            | 6                           | 16.7%                         | 11.3                                     | 0.0%               | 0.0%                       | 0.0%                               |
| Radical resection of capsule, soft tissue, and heterotopic bone, elbow, with contracture release       | 4                           | 50.0%                         | 15.4                                     | 0.0%               | 0.0%                       | 0.0%                               |
| Esophagogastric fundoplasty                                                                            | 12                          | 16.7%                         | 5.1                                      | 0.0%               | 0.0%                       | 0.0%                               |
| Stereotactic biopsy, aspiration, or excision, including burr hole(s), for intracranial lesion          | 13                          | 23.1%                         | 4.7                                      | 0.0%               | 0.0%                       | 0.0%                               |
| Colpoperineorrhaphy                                                                                    | 25                          | 4.0%                          | 2.4                                      | 0.0%               | 0.0%                       | 0.0%                               |
| Adrenalectomy - laparoscopic                                                                           | 9                           | 22.2%                         | 6.7                                      | 0.0%               | 0.0%                       | 0.0%                               |
| Insertion of orbital implant                                                                           | 4                           | 25.0%                         | 15.0                                     | 0.0%               | 0.0%                       | 0.0%                               |
| Vulvectomy                                                                                             | 4                           | 25.0%                         | 15.0                                     | 0.0%               | 0.0%                       | 0.0%                               |
| Excision of radial head                                                                                | 2                           | 50.0%                         | 30.0                                     | 0.0%               | 0.0%                       | 0.0%                               |
| Parathyroidectomy                                                                                      | 1                           | 100.0%                        | 60.0                                     | 0.0%               | 0.0%                       | 0.0%                               |
| Intestinal procedure, lysis of adhesions                                                               | 42                          | 4.8%                          | 1.4                                      | 0.0%               | 0.0%                       | 0.0%                               |
| Repair of encephalocele, skull vault, including cranioplasty                                           | 15                          | 13.3%                         | 3.9                                      | 0.0%               | 0.0%                       | 0.0%                               |
| Resection of metatarsal or toe                                                                         | 5                           | 40.0%                         | 11.7                                     | 0.0%               | 0.0%                       | 0.0%                               |
| Intestinal procedure, repair                                                                           | 15                          | 13.3%                         | 3.8                                      | 0.0%               | 0.0%                       | 0.0%                               |
| Aqueous shunt to extraocular equatorial plate reservoir                                                | 32                          | 9.4%                          | 1.7                                      | 0.0%               | 0.0%                       | 0.0%                               |
| Closure of ureterocutaneous fistula                                                                    | 12                          | 16.7%                         | 4.5                                      | 0.0%               | 0.0%                       | 0.0%                               |
| Anoplasty                                                                                              | 14                          | 7.1%                          | 3.8                                      | 0.0%               | 0.0%                       | 0.0%                               |
| Muscle repair, hand                                                                                    | 1                           | 100.0%                        | 50.0                                     | 0.0%               | 0.0%                       | 0.0%                               |
| Reconstruction of hand interphalangeal joint                                                           | 1                           | 100.0%                        | 50.0                                     | 0.0%               | 0.0%                       | 0.0%                               |
| Transureteroureterostomy                                                                               | 2                           | 100.0%                        | 24.8                                     | 0.0%               | 0.0%                       | 0.0%                               |
| Cholecystectomy - open                                                                                 | 7                           | 14.3%                         | 6.9                                      | 0.0%               | 0.0%                       | 0.0%                               |
| Removal of synthetic rod and insertion of tendon graft in hand or finger                               | 2                           | 50.0%                         | 23.8                                     | 0.0%               | 0.0%                       | 0.0%                               |
| Repair of pulmonary artery stenosis by reconstruction with patch or graft                              | 26                          | 19.2%                         | 1.8                                      | 0.0%               | 0.0%                       | 0.0%                               |
| Destruction of localized lesion of retina                                                              | 75                          | 2.7%                          | 0.6                                      | 0.0%               | 0.0%                       | 0.0%                               |
| Stereotactic implantation of depth electrodes into the cerebrum for long-term seizure monitoring       | 21                          | 9.5%                          | 2.1                                      | 0.0%               | 0.0%                       | 0.0%                               |
| Replantation, upper extremity                                                                          | 7                           | 14.3%                         | 6.4                                      | 14.3%              | 0.0%                       | 0.0%                               |
| Intestinal procedure, colon repair without or without ostomy for ulcer, diverticulum, wound, or injury | 6                           | 16.7%                         | 7.5                                      | 0.0%               | 0.0%                       | 0.0%                               |
| Exploration of artery without surgical repair                                                          | 1                           | 100.0%                        | 45.0                                     | 0.0%               | 0.0%                       | 0.0%                               |
| Gender affirming procedure, vaginoplasty                                                               | 7                           | 42.9%                         | 6.1                                      | 0.0%               | 0.0%                       | 0.0%                               |
| Vesiculotomy                                                                                           | 1                           | 100.0%                        | 42.1                                     | 0.0%               | 0.0%                       | 0.0%                               |
| Vestibuloplasty                                                                                        | 9                           | 33.3%                         | 4.7                                      | 0.0%               | 0.0%                       | 0.0%                               |
| Resection of mediastinal tumor                                                                         | 8                           | 25.0%                         | 5.3                                      | 12.5%              | 0.0%                       | 0.0%                               |
| Surgical treatment of anal fistula                                                                     | 18                          | 11.1%                         | 2.3                                      | 0.0%               | 0.0%                       | 0.0%                               |
| Enterolysis - laparoscopic                                                                             | 23                          | 4.3%                          | 1.7                                      | 0.0%               | 0.0%                       | 0.0%                               |
| Excision or destruction - intra-abdominal tumors, cysts or endometriomas                               | 26                          | 11.5%                         | 1.5                                      | 0.0%               | 0.0%                       | 0.0%                               |
| Osteoplasty of facial bones                                                                            | 6                           | 16.7%                         | 6.5                                      | 0.0%               | 0.0%                       | 0.0%                               |
| Gastrorrhaphy, suture of perforated duodenal or gastric ulcer, wound, or injury                        | 13                          | 7.7%                          | 2.9                                      | 7.7%               | 0.0%                       | 0.0%                               |
| Biliary reconstruction - open                                                                          | 12                          | 8.3%                          | 3.1                                      | 0.0%               | 0.0%                       | 0.0%                               |
| Reimplantation of an anomalous pulmonary artery                                                        | 3                           | 33.3%                         | 12.5                                     | 0.0%               | 0.0%                       | 0.0%                               |

**SUPPLEMENTAL TABLE 6** Continued

| <b>Procedure</b>                                                                                | <b>Number of procedures</b> | <b>Opioid dispensing rate</b> | <b>Mean MMEs per dispensed opioid Rx</b> | <b>Refill rate</b> | <b>Share of total MMEs</b> | <b>Share of surgical opioid Rx</b> |
|-------------------------------------------------------------------------------------------------|-----------------------------|-------------------------------|------------------------------------------|--------------------|----------------------------|------------------------------------|
| Excision of lesion of spermatic cord                                                            | 7                           | 28.6%                         | 4.9                                      | 0.0%               | 0.0%                       | 0.0%                               |
| Removal of lens material                                                                        | 63                          | 3.2%                          | 0.5                                      | 0.0%               | 0.0%                       | 0.0%                               |
| Repair of pulmonary venous stenosis                                                             | 9                           | 44.4%                         | 3.3                                      | 0.0%               | 0.0%                       | 0.0%                               |
| Excision of chest wall tumor, including ribs                                                    | 8                           | 12.5%                         | 3.8                                      | 0.0%               | 0.0%                       | 0.0%                               |
| Tendon lengthening or shortening, upper extremity                                               | 8                           | 12.5%                         | 3.8                                      | 0.0%               | 0.0%                       | 0.0%                               |
| Repair of round window fistula                                                                  | 5                           | 20.0%                         | 6.0                                      | 0.0%               | 0.0%                       | 0.0%                               |
| Capsulectomy or capsulotomy, hip                                                                | 3                           | 33.3%                         | 10.0                                     | 0.0%               | 0.0%                       | 0.0%                               |
| Diaphragmatic repair                                                                            | 3                           | 33.3%                         | 10.0                                     | 0.0%               | 0.0%                       | 0.0%                               |
| Excision of prepatellar bursa                                                                   | 3                           | 33.3%                         | 10.0                                     | 0.0%               | 0.0%                       | 0.0%                               |
| Resection or excision of neoplastic, vascular or infectious lesion, intracranial                | 3                           | 33.3%                         | 10.0                                     | 0.0%               | 0.0%                       | 0.0%                               |
| Extensor tendon centralization, hand                                                            | 2                           | 50.0%                         | 15.0                                     | 0.0%               | 0.0%                       | 0.0%                               |
| CABG                                                                                            | 1                           | 100.0%                        | 30.0                                     | 0.0%               | 0.0%                       | 0.0%                               |
| Mastopexy                                                                                       | 1                           | 100.0%                        | 30.0                                     | 0.0%               | 0.0%                       | 0.0%                               |
| Release of intrinsic muscles of hand                                                            | 1                           | 100.0%                        | 30.0                                     | 0.0%               | 0.0%                       | 0.0%                               |
| Colectomy and/or proctectomy - laparoscopic                                                     | 54                          | 3.7%                          | 0.5                                      | 0.0%               | 0.0%                       | 0.0%                               |
| Keratoplasty                                                                                    | 13                          | 23.1%                         | 2.2                                      | 0.0%               | 0.0%                       | 0.0%                               |
| Thoracoscopy, with partial or complete lung removal                                             | 63                          | 4.8%                          | 0.4                                      | 0.0%               | 0.0%                       | 0.0%                               |
| Repair of cor triatriatum or supra-ventricular mitral ring by resection of left atrial membrane | 2                           | 100.0%                        | 12.8                                     | 0.0%               | 0.0%                       | 0.0%                               |
| Repair of anomalous coronary artery from pulmonary artery origin                                | 16                          | 6.3%                          | 1.6                                      | 0.0%               | 0.0%                       | 0.0%                               |
| Urethrectomy, total, including cystostomy                                                       | 2                           | 100.0%                        | 12.5                                     | 0.0%               | 0.0%                       | 0.0%                               |
| Repair of choanal atresia                                                                       | 31                          | 3.2%                          | 0.8                                      | 0.0%               | 0.0%                       | 0.0%                               |
| Esophagoplasty                                                                                  | 13                          | 7.7%                          | 1.8                                      | 0.0%               | 0.0%                       | 0.0%                               |
| Repair of double outlet right ventricle with intraventricular tunnel repair                     | 9                           | 11.1%                         | 2.7                                      | 0.0%               | 0.0%                       | 0.0%                               |
| Laparoscopic esophagus fundoplasty                                                              | 83                          | 1.2%                          | 0.3                                      | 0.0%               | 0.0%                       | 0.0%                               |
| Medianstomy                                                                                     | 8                           | 12.5%                         | 2.8                                      | 0.0%               | 0.0%                       | 0.0%                               |
| Outflow tract augmentation (gusset), with or without commissurotomy or infundibular resection   | 5                           | 60.0%                         | 4.5                                      | 0.0%               | 0.0%                       | 0.0%                               |
| Hand, soft tissue reconstruction                                                                | 3                           | 33.3%                         | 7.5                                      | 0.0%               | 0.0%                       | 0.0%                               |
| Excision of Meckel diverticulum or omphalomesenteric duct                                       | 19                          | 10.5%                         | 1.1                                      | 0.0%               | 0.0%                       | 0.0%                               |
| Exclusion or fulguration of urethra                                                             | 13                          | 15.4%                         | 1.4                                      | 0.0%               | 0.0%                       | 0.0%                               |
| Closure of gastrocolic fistula                                                                  | 11                          | 9.1%                          | 1.6                                      | 0.0%               | 0.0%                       | 0.0%                               |
| Facial nerve reconstruction or repair                                                           | 2                           | 50.0%                         | 9.0                                      | 0.0%               | 0.0%                       | 0.0%                               |
| Repair of paraesophageal hiatal hernia (including fundoplication)                               | 9                           | 22.2%                         | 1.9                                      | 0.0%               | 0.0%                       | 0.0%                               |
| Laparoscopic sling operation for stress incontinence (eg, fascia or synthetic)                  | 1                           | 100.0%                        | 16.5                                     | 0.0%               | 0.0%                       | 0.0%                               |
| Temporary closure of eyelids by suture                                                          | 22                          | 4.5%                          | 0.7                                      | 0.0%               | 0.0%                       | 0.0%                               |
| Ureterostomy, transplantation of ureter to skin                                                 | 11                          | 9.1%                          | 1.4                                      | 0.0%               | 0.0%                       | 0.0%                               |
| Coccygectomy, primary                                                                           | 5                           | 20.0%                         | 3.0                                      | 0.0%               | 0.0%                       | 0.0%                               |
| Cystolithotomy, cystotomy with removal of calculus                                              | 3                           | 33.3%                         | 5.0                                      | 0.0%               | 0.0%                       | 0.0%                               |
| Aneurysm/pseudoaneurysm repair                                                                  | 1                           | 100.0%                        | 15.0                                     | 0.0%               | 0.0%                       | 0.0%                               |
| Excision of urethral diverticulum                                                               | 3                           | 66.7%                         | 3.9                                      | 0.0%               | 0.0%                       | 0.0%                               |
| Excision of cystic hygroma                                                                      | 9                           | 11.1%                         | 1.3                                      | 0.0%               | 0.0%                       | 0.0%                               |
| Percutaneous coronary procedures                                                                | 681                         | 0.4%                          | 0.0                                      | 0.0%               | 0.0%                       | 0.0%                               |
| Exploration for postoperative hemorrhage, thrombosis or infection                               | 2                           | 50.0%                         | 5.0                                      | 0.0%               | 0.0%                       | 0.0%                               |
| Laparoscopic testicular procedure                                                               | 8                           | 12.5%                         | 1.1                                      | 0.0%               | 0.0%                       | 0.0%                               |
| Transcatheter intracardiac shunt creation                                                       | 10                          | 10.0%                         | 0.8                                      | 0.0%               | 0.0%                       | 0.0%                               |

**SUPPLEMENTAL TABLE 6** Continued

| <b>Procedure</b>                                                                                                                             | <b>Number of procedures</b> | <b>Opioid dispensing rate</b> | <b>Mean MMEs per dispensed opioid Rx</b> | <b>Refill rate</b> | <b>Share of total MMEs</b> | <b>Share of surgical opioid Rx</b> |
|----------------------------------------------------------------------------------------------------------------------------------------------|-----------------------------|-------------------------------|------------------------------------------|--------------------|----------------------------|------------------------------------|
| Excision of exostosis(es), external auditory canal                                                                                           | 4                           | 25.0%                         | 1.9                                      | 0.0%               | 0.0%                       | 0.0%                               |
| Division of scalenus anticus                                                                                                                 | 2                           | 50.0%                         | 3.8                                      | 0.0%               | 0.0%                       | 0.0%                               |
| Syndactylization, toes                                                                                                                       | 2                           | 50.0%                         | 3.8                                      | 0.0%               | 0.0%                       | 0.0%                               |
| Ureteropyelostomy, anastomosis of ureter and renal pelvis                                                                                    | 1                           | 100.0%                        | 7.5                                      | 0.0%               | 0.0%                       | 0.0%                               |
| Vitrectomy                                                                                                                                   | 75                          | 9.3%                          | 0.1                                      | 0.0%               | 0.0%                       | 0.0%                               |
| Ciliary body destruction                                                                                                                     | 53                          | 15.1%                         | 0.1                                      | 0.0%               | 0.0%                       | 0.0%                               |
| Reconstruction of mandible or maxilla                                                                                                        | 7                           | 14.3%                         | 0.9                                      | 0.0%               | 0.0%                       | 0.0%                               |
| Plastic repair of salivary duct, sialodochoplasty                                                                                            | 6                           | 16.7%                         | 0.8                                      | 0.0%               | 0.0%                       | 0.0%                               |
| Cystoplasty or cystourethroplasty                                                                                                            | 1                           | 100.0%                        | 5.0                                      | 0.0%               | 0.0%                       | 0.0%                               |
| Tracheostoma revision                                                                                                                        | 54                          | 1.9%                          | 0.1                                      | 0.0%               | 0.0%                       | 0.0%                               |
| Repair of hypoplastic or interrupted aortic arch using autogenous or prosthetic material                                                     | 10                          | 10.0%                         | 0.4                                      | 0.0%               | 0.0%                       | 0.0%                               |
| Removal or repair of electromagnetic bone conduction hearing device in temporal bone                                                         | 3                           | 33.3%                         | 0.8                                      | 0.0%               | 0.0%                       | 0.0%                               |
| Severing adhesions of anterior segment of eye                                                                                                | 7                           | 28.6%                         | 0.2                                      | 0.0%               | 0.0%                       | 0.0%                               |
| Drainage of peritoneal abscess - open                                                                                                        | 9                           | 11.1%                         | 0.2                                      | 0.0%               | 0.0%                       | 0.0%                               |
| Laparoscopic stomach procedure                                                                                                               | 244                         | 0.0%                          | 0.0                                      | 0.0%               | 0.0%                       | 0.0%                               |
| Interventional cardiology; Comprehensive electrophysiologic evaluation including insertion and repositioning of multiple electrode catheters | 168                         | 0.0%                          | 0.0                                      | 0.0%               | 0.0%                       | 0.0%                               |
| Pyloromyotomy, cutting of pyloric muscle (Fredet-Ramstedt type operation)                                                                    | 157                         | 0.0%                          | 0.0                                      | 0.0%               | 0.0%                       | 0.0%                               |
| Transcatheter placement of intravascular stent - percutaneous or open                                                                        | 147                         | 0.0%                          | 0.0                                      | 0.0%               | 0.0%                       | 0.0%                               |
| Placement of needle for intraosseous infusion                                                                                                | 119                         | 0.0%                          | 0.0                                      | 0.0%               | 0.0%                       | 0.0%                               |
| Intestinal procedure, resection and closure of enterostomy                                                                                   | 87                          | 0.0%                          | 0.0                                      | 0.0%               | 0.0%                       | 0.0%                               |
| Intravitreal injection of a pharmacologic agent                                                                                              | 84                          | 0.0%                          | 0.0                                      | 0.0%               | 0.0%                       | 0.0%                               |
| Plastic repair of canaliculi                                                                                                                 | 67                          | 0.0%                          | 0.0                                      | 0.0%               | 0.0%                       | 0.0%                               |
| Colostomy - open                                                                                                                             | 47                          | 0.0%                          | 0.0                                      | 0.0%               | 0.0%                       | 0.0%                               |
| Removal of vitreous, anterior approach                                                                                                       | 40                          | 0.0%                          | 0.0                                      | 0.0%               | 0.0%                       | 0.0%                               |
| Burr hole(s) or trephine                                                                                                                     | 36                          | 0.0%                          | 0.0                                      | 0.0%               | 0.0%                       | 0.0%                               |
| Laparoscopic repair of paraesophageal hernia                                                                                                 | 31                          | 0.0%                          | 0.0                                      | 0.0%               | 0.0%                       | 0.0%                               |
| Exploratory laparotomy                                                                                                                       | 27                          | 0.0%                          | 0.0                                      | 0.0%               | 0.0%                       | 0.0%                               |
| Intestinal procedure, intestinal hernia and volvulus derotation open laparotomy                                                              | 26                          | 0.0%                          | 0.0                                      | 0.0%               | 0.0%                       | 0.0%                               |
| Atrial septectomy or septostomy                                                                                                              | 24                          | 0.0%                          | 0.0                                      | 0.0%               | 0.0%                       | 0.0%                               |
| Insertion or replacement of cranial neurostimulator pulse generator or receiver                                                              | 24                          | 0.0%                          | 0.0                                      | 0.0%               | 0.0%                       | 0.0%                               |
| Tracheostomy                                                                                                                                 | 22                          | 0.0%                          | 0.0                                      | 0.0%               | 0.0%                       | 0.0%                               |
| Thoracoscopy, excision of pericardial or mediastinal mass                                                                                    | 19                          | 0.0%                          | 0.0                                      | 0.0%               | 0.0%                       | 0.0%                               |
| Diaphragmatic hernia repair (neonatal)                                                                                                       | 17                          | 0.0%                          | 0.0                                      | 0.0%               | 0.0%                       | 0.0%                               |
| Trabeculectomy ab externo                                                                                                                    | 17                          | 0.0%                          | 0.0                                      | 0.0%               | 0.0%                       | 0.0%                               |
| Closure of the lacrimal punctum                                                                                                              | 16                          | 0.0%                          | 0.0                                      | 0.0%               | 0.0%                       | 0.0%                               |
| Excision and repair of eyelid                                                                                                                | 16                          | 0.0%                          | 0.0                                      | 0.0%               | 0.0%                       | 0.0%                               |
| Injection of medication or other substance into Tenon's capsule                                                                              | 14                          | 0.0%                          | 0.0                                      | 0.0%               | 0.0%                       | 0.0%                               |
| Intestinal procedure, resection and enterostomy                                                                                              | 14                          | 0.0%                          | 0.0                                      | 0.0%               | 0.0%                       | 0.0%                               |
| Repair of omphalocele or gastroschisis                                                                                                       | 14                          | 0.0%                          | 0.0                                      | 0.0%               | 0.0%                       | 0.0%                               |
| Twist drill hole for subdural, intracerebral, or ventricular puncture                                                                        | 14                          | 0.0%                          | 0.0                                      | 0.0%               | 0.0%                       | 0.0%                               |
| Laparoscopic appendix procedure                                                                                                              | 13                          | 0.0%                          | 0.0                                      | 0.0%               | 0.0%                       | 0.0%                               |
| Transcatheter pulmonary valve implantation                                                                                                   | 13                          | 0.0%                          | 0.0                                      | 0.0%               | 0.0%                       | 0.0%                               |

**SUPPLEMENTAL TABLE 6** Continued

| <b>Procedure</b>                                                                               | <b>Number of procedures</b> | <b>Opioid dispensing rate</b> | <b>Mean MMEs per dispensed opioid Rx</b> | <b>Refill rate</b> | <b>Share of total MMEs</b> | <b>Share of surgical opioid Rx</b> |
|------------------------------------------------------------------------------------------------|-----------------------------|-------------------------------|------------------------------------------|--------------------|----------------------------|------------------------------------|
| Banding of pulmonary artery                                                                    | 12                          | 0.0%                          | 0.0                                      | 0.0%               | 0.0%                       | 0.0%                               |
| Incision and drainage, leg or ankle                                                            | 12                          | 0.0%                          | 0.0                                      | 0.0%               | 0.0%                       | 0.0%                               |
| Thoracoscopy, with pulmonary decortication                                                     | 12                          | 0.0%                          | 0.0                                      | 0.0%               | 0.0%                       | 0.0%                               |
| Thymectomy, with or without lymphadenectomy                                                    | 12                          | 0.0%                          | 0.0                                      | 0.0%               | 0.0%                       | 0.0%                               |
| Closure of intestinal fistula                                                                  | 11                          | 0.0%                          | 0.0                                      | 0.0%               | 0.0%                       | 0.0%                               |
| Reconstruction of eyelid                                                                       | 11                          | 0.0%                          | 0.0                                      | 0.0%               | 0.0%                       | 0.0%                               |
| Repair of meningocele or myelomeningocele                                                      | 11                          | 0.0%                          | 0.0                                      | 0.0%               | 0.0%                       | 0.0%                               |
| Drainage of breast abscess                                                                     | 10                          | 0.0%                          | 0.0                                      | 0.0%               | 0.0%                       | 0.0%                               |
| Excision of presacral or sacrococcygeal tumor                                                  | 10                          | 0.0%                          | 0.0                                      | 0.0%               | 0.0%                       | 0.0%                               |
| Insertion of intraocular lens prosthesis, not associated with concurrent cataract removal      | 10                          | 0.0%                          | 0.0                                      | 0.0%               | 0.0%                       | 0.0%                               |
| Repair of blood vessel                                                                         | 10                          | 0.0%                          | 0.0                                      | 0.0%               | 0.0%                       | 0.0%                               |
| Transplantation of kidneys                                                                     | 9                           | 0.0%                          | 0.0                                      | 0.0%               | 0.0%                       | 0.0%                               |
| Enterotomy                                                                                     | 8                           | 0.0%                          | 0.0                                      | 0.0%               | 0.0%                       | 0.0%                               |
| Epiglottidectomy                                                                               | 8                           | 0.0%                          | 0.0                                      | 0.0%               | 0.0%                       | 0.0%                               |
| Excision of rectal procidentia                                                                 | 8                           | 0.0%                          | 0.0                                      | 0.0%               | 0.0%                       | 0.0%                               |
| Excision of rectal tumor, transanal, transsacral, transcoccygeal                               | 8                           | 0.0%                          | 0.0                                      | 0.0%               | 0.0%                       | 0.0%                               |
| Portoenterostomy                                                                               | 8                           | 0.0%                          | 0.0                                      | 0.0%               | 0.0%                       | 0.0%                               |
| Adrenalectomy - open                                                                           | 7                           | 0.0%                          | 0.0                                      | 0.0%               | 0.0%                       | 0.0%                               |
| Debridement of sternum                                                                         | 7                           | 0.0%                          | 0.0                                      | 0.0%               | 0.0%                       | 0.0%                               |
| Fistulization of sclera for glaucoma                                                           | 7                           | 0.0%                          | 0.0                                      | 0.0%               | 0.0%                       | 0.0%                               |
| Incision and drainage of abscess, cyst, or hematoma of tongue or floor of mouth                | 7                           | 0.0%                          | 0.0                                      | 0.0%               | 0.0%                       | 0.0%                               |
| Laparoscopic hernia repair                                                                     | 7                           | 0.0%                          | 0.0                                      | 0.0%               | 0.0%                       | 0.0%                               |
| Laparoscopic ureteral procedure                                                                | 7                           | 0.0%                          | 0.0                                      | 0.0%               | 0.0%                       | 0.0%                               |
| Nasal/sinus endoscopy                                                                          | 7                           | 0.0%                          | 0.0                                      | 0.0%               | 0.0%                       | 0.0%                               |
| Proctoplasty                                                                                   | 7                           | 0.0%                          | 0.0                                      | 0.0%               | 0.0%                       | 0.0%                               |
| Revision of aqueous shunt to extraocular equatorial plate reservoir                            | 7                           | 0.0%                          | 0.0                                      | 0.0%               | 0.0%                       | 0.0%                               |
| Colotomy                                                                                       | 6                           | 0.0%                          | 0.0                                      | 0.0%               | 0.0%                       | 0.0%                               |
| Creation of pericardial window                                                                 | 6                           | 0.0%                          | 0.0                                      | 0.0%               | 0.0%                       | 0.0%                               |
| ECMO                                                                                           | 6                           | 0.0%                          | 0.0                                      | 0.0%               | 0.0%                       | 0.0%                               |
| Exploration, retroperitoneal area with or without biopsy(s)                                    | 6                           | 0.0%                          | 0.0                                      | 0.0%               | 0.0%                       | 0.0%                               |
| Implantation or replacement of electromagnetic bone conduction hearing device in temporal bone | 6                           | 0.0%                          | 0.0                                      | 0.0%               | 0.0%                       | 0.0%                               |
| Incision and drainage of rectal, perirectal, or perianal abscess                               | 6                           | 0.0%                          | 0.0                                      | 0.0%               | 0.0%                       | 0.0%                               |
| Liver transplantation                                                                          | 6                           | 0.0%                          | 0.0                                      | 0.0%               | 0.0%                       | 0.0%                               |
| Pericardial drainage                                                                           | 6                           | 0.0%                          | 0.0                                      | 0.0%               | 0.0%                       | 0.0%                               |
| Revision of tracheostomy scar                                                                  | 6                           | 0.0%                          | 0.0                                      | 0.0%               | 0.0%                       | 0.0%                               |
| Cartilage graft                                                                                | 5                           | 0.0%                          | 0.0                                      | 0.0%               | 0.0%                       | 0.0%                               |
| Control of nasopharyngeal or oropharyngeal hemorrhage                                          | 5                           | 0.0%                          | 0.0                                      | 0.0%               | 0.0%                       | 0.0%                               |
| Diaphragmatic hernia repair (other than neonatal)                                              | 5                           | 0.0%                          | 0.0                                      | 0.0%               | 0.0%                       | 0.0%                               |
| Excision of lesion of tongue                                                                   | 5                           | 0.0%                          | 0.0                                      | 0.0%               | 0.0%                       | 0.0%                               |
| Exploration for congenital atresia of bile ducts, without repair                               | 5                           | 0.0%                          | 0.0                                      | 0.0%               | 0.0%                       | 0.0%                               |
| Incision and drainage of abscess; retropharyngeal or parapharyngeal                            | 5                           | 0.0%                          | 0.0                                      | 0.0%               | 0.0%                       | 0.0%                               |
| Intestinal procedure, resection and anastomosis - laparoscopic                                 | 5                           | 0.0%                          | 0.0                                      | 0.0%               | 0.0%                       | 0.0%                               |
| Iridectomy, with corneoscleral or corneal section                                              | 5                           | 0.0%                          | 0.0                                      | 0.0%               | 0.0%                       | 0.0%                               |
| Laparoscopic rectal procedure                                                                  | 5                           | 0.0%                          | 0.0                                      | 0.0%               | 0.0%                       | 0.0%                               |

**SUPPLEMENTAL TABLE 6** Continued

| <b>Procedure</b>                                                                                                                                       | <b>Number of procedures</b> | <b>Opioid dispensing rate</b> | <b>Mean MMEs per dispensed opioid Rx</b> | <b>Refill rate</b> | <b>Share of total MMEs</b> | <b>Share of surgical opioid Rx</b> |
|--------------------------------------------------------------------------------------------------------------------------------------------------------|-----------------------------|-------------------------------|------------------------------------------|--------------------|----------------------------|------------------------------------|
| Thoracoscopy, with pleurodesis                                                                                                                         | 5                           | 0.0%                          | 0.0                                      | 0.0%               | 0.0%                       | 0.0%                               |
| Tracheoplasty                                                                                                                                          | 5                           | 0.0%                          | 0.0                                      | 0.0%               | 0.0%                       | 0.0%                               |
| Creation of lesion by stereotactic method                                                                                                              | 4                           | 0.0%                          | 0.0                                      | 0.0%               | 0.0%                       | 0.0%                               |
| Cystorrhaphy, suture of bladder wound, injury or rupture                                                                                               | 4                           | 0.0%                          | 0.0                                      | 0.0%               | 0.0%                       | 0.0%                               |
| Destruction of lesion(s), anus                                                                                                                         | 4                           | 0.0%                          | 0.0                                      | 0.0%               | 0.0%                       | 0.0%                               |
| Drainage of salivary gland abscess                                                                                                                     | 4                           | 0.0%                          | 0.0                                      | 0.0%               | 0.0%                       | 0.0%                               |
| Excision of tendon, hand                                                                                                                               | 4                           | 0.0%                          | 0.0                                      | 0.0%               | 0.0%                       | 0.0%                               |
| Excision or transposition of pterygium                                                                                                                 | 4                           | 0.0%                          | 0.0                                      | 0.0%               | 0.0%                       | 0.0%                               |
| Gastric bypass                                                                                                                                         | 4                           | 0.0%                          | 0.0                                      | 0.0%               | 0.0%                       | 0.0%                               |
| Intestinal procedure, strictuloplasty                                                                                                                  | 4                           | 0.0%                          | 0.0                                      | 0.0%               | 0.0%                       | 0.0%                               |
| Laparoscopic enterotomy closure                                                                                                                        | 4                           | 0.0%                          | 0.0                                      | 0.0%               | 0.0%                       | 0.0%                               |
| Neurostimulator procedures                                                                                                                             | 4                           | 0.0%                          | 0.0                                      | 0.0%               | 0.0%                       | 0.0%                               |
| Perineoplasty, repair of perineum, nonobstetrical                                                                                                      | 4                           | 0.0%                          | 0.0                                      | 0.0%               | 0.0%                       | 0.0%                               |
| Pharyngoesophageal repair                                                                                                                              | 4                           | 0.0%                          | 0.0                                      | 0.0%               | 0.0%                       | 0.0%                               |
| Placement of enterostomy or cecostomy, tube open                                                                                                       | 4                           | 0.0%                          | 0.0                                      | 0.0%               | 0.0%                       | 0.0%                               |
| Removal of foreign body, intraocular                                                                                                                   | 4                           | 0.0%                          | 0.0                                      | 0.0%               | 0.0%                       | 0.0%                               |
| Repair of wound, extraocular muscle, tendon and/or Tenon's capsule                                                                                     | 4                           | 0.0%                          | 0.0                                      | 0.0%               | 0.0%                       | 0.0%                               |
| Cesarean section                                                                                                                                       | 3                           | 0.0%                          | 0.0                                      | 0.0%               | 0.0%                       | 0.0%                               |
| Construction of intermarginal adhesions, median tarsorrhaphy, or canthorrhaphy                                                                         | 3                           | 0.0%                          | 0.0                                      | 0.0%               | 0.0%                       | 0.0%                               |
| Creation of shunt, lumbar, subarachnoid-peritoneal, -pleural, or other; with or without laminectomy                                                    | 3                           | 0.0%                          | 0.0                                      | 0.0%               | 0.0%                       | 0.0%                               |
| Cricopharyngeal myotomy                                                                                                                                | 3                           | 0.0%                          | 0.0                                      | 0.0%               | 0.0%                       | 0.0%                               |
| Excision of vaginal cyst or tumor                                                                                                                      | 3                           | 0.0%                          | 0.0                                      | 0.0%               | 0.0%                       | 0.0%                               |
| Goniotomy                                                                                                                                              | 3                           | 0.0%                          | 0.0                                      | 0.0%               | 0.0%                       | 0.0%                               |
| Incision of tendon sheath of wrist                                                                                                                     | 3                           | 0.0%                          | 0.0                                      | 0.0%               | 0.0%                       | 0.0%                               |
| Laryngeal reinnervation by neuromuscular pedicle                                                                                                       | 3                           | 0.0%                          | 0.0                                      | 0.0%               | 0.0%                       | 0.0%                               |
| Ligation of blood vessels                                                                                                                              | 3                           | 0.0%                          | 0.0                                      | 0.0%               | 0.0%                       | 0.0%                               |
| Paracentesis of anterior chamber of eye                                                                                                                | 3                           | 0.0%                          | 0.0                                      | 0.0%               | 0.0%                       | 0.0%                               |
| Pyloroplasty                                                                                                                                           | 3                           | 0.0%                          | 0.0                                      | 0.0%               | 0.0%                       | 0.0%                               |
| Reconstruction of fingertip                                                                                                                            | 3                           | 0.0%                          | 0.0                                      | 0.0%               | 0.0%                       | 0.0%                               |
| Release of extensive scar tissue without detaching extraocular muscle (separate procedure)                                                             | 3                           | 0.0%                          | 0.0                                      | 0.0%               | 0.0%                       | 0.0%                               |
| Repair of cloacal anomaly by anorectovaginoplasty and urethroplasty                                                                                    | 3                           | 0.0%                          | 0.0                                      | 0.0%               | 0.0%                       | 0.0%                               |
| Repair of pulmonary atresia with ventricular septal defect, by construction or replacement of conduit from right or left ventricle to pulmonary artery | 3                           | 0.0%                          | 0.0                                      | 0.0%               | 0.0%                       | 0.0%                               |
| Right ventricular resection for infundibular stenosis                                                                                                  | 3                           | 0.0%                          | 0.0                                      | 0.0%               | 0.0%                       | 0.0%                               |
| Sialolithotomy                                                                                                                                         | 3                           | 0.0%                          | 0.0                                      | 0.0%               | 0.0%                       | 0.0%                               |
| Synovectomy, hand                                                                                                                                      | 3                           | 0.0%                          | 0.0                                      | 0.0%               | 0.0%                       | 0.0%                               |
| Thoracotomy, with cyst, mass, or foreign body removal                                                                                                  | 3                           | 0.0%                          | 0.0                                      | 0.0%               | 0.0%                       | 0.0%                               |
| Urethrorrhaphy                                                                                                                                         | 3                           | 0.0%                          | 0.0                                      | 0.0%               | 0.0%                       | 0.0%                               |
| Venous bypass, abdominal - open                                                                                                                        | 3                           | 0.0%                          | 0.0                                      | 0.0%               | 0.0%                       | 0.0%                               |
| Aortic suspension for tracheal decompression                                                                                                           | 2                           | 0.0%                          | 0.0                                      | 0.0%               | 0.0%                       | 0.0%                               |
| Capsulotomy, posterior capsular release, knee                                                                                                          | 2                           | 0.0%                          | 0.0                                      | 0.0%               | 0.0%                       | 0.0%                               |
| Closure of lacrimal fistula                                                                                                                            | 2                           | 0.0%                          | 0.0                                      | 0.0%               | 0.0%                       | 0.0%                               |
| Craniofacial, orbitocranial, bicoronal approach to anterior cranial fossa                                                                              | 2                           | 0.0%                          | 0.0                                      | 0.0%               | 0.0%                       | 0.0%                               |
| Division of plantar fascia and muscle                                                                                                                  | 2                           | 0.0%                          | 0.0                                      | 0.0%               | 0.0%                       | 0.0%                               |
| Embolectomy or thrombectomy                                                                                                                            | 2                           | 0.0%                          | 0.0                                      | 0.0%               | 0.0%                       | 0.0%                               |

**SUPPLEMENTAL TABLE 6** Continued

| <b>Procedure</b>                                                                                                     | <b>Number of procedures</b> | <b>Opioid dispensing rate</b> | <b>Mean MMEs per dispensed opioid Rx</b> | <b>Refill rate</b> | <b>Share of total MMEs</b> | <b>Share of surgical opioid Rx</b> |
|----------------------------------------------------------------------------------------------------------------------|-----------------------------|-------------------------------|------------------------------------------|--------------------|----------------------------|------------------------------------|
| Esophagostomy                                                                                                        | 2                           | 0.0%                          | 0.0                                      | 0.0%               | 0.0%                       | 0.0%                               |
| Excision of external ear                                                                                             | 2                           | 0.0%                          | 0.0                                      | 0.0%               | 0.0%                       | 0.0%                               |
| Excision of lesion of meniscus or capsule, knee                                                                      | 2                           | 0.0%                          | 0.0                                      | 0.0%               | 0.0%                       | 0.0%                               |
| Excision of lesion, conjunctiva                                                                                      | 2                           | 0.0%                          | 0.0                                      | 0.0%               | 0.0%                       | 0.0%                               |
| Excision of osseous tuberosities, dentoalveolar structures                                                           | 2                           | 0.0%                          | 0.0                                      | 0.0%               | 0.0%                       | 0.0%                               |
| Excision of tracheal tumor or carcinoma                                                                              | 2                           | 0.0%                          | 0.0                                      | 0.0%               | 0.0%                       | 0.0%                               |
| Excision of vaginal septum                                                                                           | 2                           | 0.0%                          | 0.0                                      | 0.0%               | 0.0%                       | 0.0%                               |
| Exploration, repair, and presacral drainage for rectal injury                                                        | 2                           | 0.0%                          | 0.0                                      | 0.0%               | 0.0%                       | 0.0%                               |
| Fissurectomy                                                                                                         | 2                           | 0.0%                          | 0.0                                      | 0.0%               | 0.0%                       | 0.0%                               |
| Gastrojejunostomy                                                                                                    | 2                           | 0.0%                          | 0.0                                      | 0.0%               | 0.0%                       | 0.0%                               |
| Heart transplant                                                                                                     | 2                           | 0.0%                          | 0.0                                      | 0.0%               | 0.0%                       | 0.0%                               |
| Insertion of subcutaneous reservoir, pump or continuous infusion system for connection to ventricular catheter (CNS) | 2                           | 0.0%                          | 0.0                                      | 0.0%               | 0.0%                       | 0.0%                               |
| Intestinal procedure, excision of lesion without anastomosis, exteriorization or fistulization                       | 2                           | 0.0%                          | 0.0                                      | 0.0%               | 0.0%                       | 0.0%                               |
| Laparoscopic biliary procedure                                                                                       | 2                           | 0.0%                          | 0.0                                      | 0.0%               | 0.0%                       | 0.0%                               |
| Laparoscopic liver procedure                                                                                         | 2                           | 0.0%                          | 0.0                                      | 0.0%               | 0.0%                       | 0.0%                               |
| Laparoscopic lysis of adhesions                                                                                      | 2                           | 0.0%                          | 0.0                                      | 0.0%               | 0.0%                       | 0.0%                               |
| Laparotomy                                                                                                           | 2                           | 0.0%                          | 0.0                                      | 0.0%               | 0.0%                       | 0.0%                               |
| Nasal septum reconstruction                                                                                          | 2                           | 0.0%                          | 0.0                                      | 0.0%               | 0.0%                       | 0.0%                               |
| Osteotomy of spine                                                                                                   | 2                           | 0.0%                          | 0.0                                      | 0.0%               | 0.0%                       | 0.0%                               |
| Parotid duct diversion                                                                                               | 2                           | 0.0%                          | 0.0                                      | 0.0%               | 0.0%                       | 0.0%                               |
| Proctopexy - open                                                                                                    | 2                           | 0.0%                          | 0.0                                      | 0.0%               | 0.0%                       | 0.0%                               |
| Pyelotomy                                                                                                            | 2                           | 0.0%                          | 0.0                                      | 0.0%               | 0.0%                       | 0.0%                               |
| Reconstruction of vena cava, any method                                                                              | 2                           | 0.0%                          | 0.0                                      | 0.0%               | 0.0%                       | 0.0%                               |
| Removal of foreign body from deep penile tissue (eg, plastic implant)                                                | 2                           | 0.0%                          | 0.0                                      | 0.0%               | 0.0%                       | 0.0%                               |
| Removal or revision of orbital implant                                                                               | 2                           | 0.0%                          | 0.0                                      | 0.0%               | 0.0%                       | 0.0%                               |
| Repair of ectropion                                                                                                  | 2                           | 0.0%                          | 0.0                                      | 0.0%               | 0.0%                       | 0.0%                               |
| Repair of transposition of the great arteries                                                                        | 2                           | 0.0%                          | 0.0                                      | 0.0%               | 0.0%                       | 0.0%                               |
| Resection of scrotum                                                                                                 | 2                           | 0.0%                          | 0.0                                      | 0.0%               | 0.0%                       | 0.0%                               |
| Revision of cranial neurostimulator pulse generator or receiver                                                      | 2                           | 0.0%                          | 0.0                                      | 0.0%               | 0.0%                       | 0.0%                               |
| Revision or repair of operative wound of anterior segment of eye                                                     | 2                           | 0.0%                          | 0.0                                      | 0.0%               | 0.0%                       | 0.0%                               |
| Sling operation for stress incontinence                                                                              | 2                           | 0.0%                          | 0.0                                      | 0.0%               | 0.0%                       | 0.0%                               |
| Thoracoscopy, with thymectomy                                                                                        | 2                           | 0.0%                          | 0.0                                      | 0.0%               | 0.0%                       | 0.0%                               |
| Thoracotomy, with control of traumatic hemorrhage and/or repair of lung tear                                         | 2                           | 0.0%                          | 0.0                                      | 0.0%               | 0.0%                       | 0.0%                               |
| Transoral approach to skull base, brain stem or upper spinal cord for biopsy                                         | 2                           | 0.0%                          | 0.0                                      | 0.0%               | 0.0%                       | 0.0%                               |
| Abdominal wall repair, dehiscence                                                                                    | 1                           | 0.0%                          | 0.0                                      | 0.0%               | 0.0%                       | 0.0%                               |
| Ablation of intra-abdominal tumor or benign lesion - laparoscopic                                                    | 1                           | 0.0%                          | 0.0                                      | 0.0%               | 0.0%                       | 0.0%                               |
| Acromioplasty or acromionectomy                                                                                      | 1                           | 0.0%                          | 0.0                                      | 0.0%               | 0.0%                       | 0.0%                               |
| Amputation of penis                                                                                                  | 1                           | 0.0%                          | 0.0                                      | 0.0%               | 0.0%                       | 0.0%                               |
| Arteriovenous fistula creation or reconstruction                                                                     | 1                           | 0.0%                          | 0.0                                      | 0.0%               | 0.0%                       | 0.0%                               |
| Biceps tenodesis or reconstruction                                                                                   | 1                           | 0.0%                          | 0.0                                      | 0.0%               | 0.0%                       | 0.0%                               |
| Biliary reconstruction - laparoscopic                                                                                | 1                           | 0.0%                          | 0.0                                      | 0.0%               | 0.0%                       | 0.0%                               |
| Bypass graft                                                                                                         | 1                           | 0.0%                          | 0.0                                      | 0.0%               | 0.0%                       | 0.0%                               |
| Closure of aortico-left ventricular tunnel                                                                           | 1                           | 0.0%                          | 0.0                                      | 0.0%               | 0.0%                       | 0.0%                               |

**SUPPLEMENTAL TABLE 6** Continued

| <b>Procedure</b>                                                      | <b>Number of procedures</b> | <b>Opioid dispensing rate</b> | <b>Mean MMEs per dispensed opioid Rx</b> | <b>Refill rate</b> | <b>Share of total MMEs</b> | <b>Share of surgical opioid Rx</b> |
|-----------------------------------------------------------------------|-----------------------------|-------------------------------|------------------------------------------|--------------------|----------------------------|------------------------------------|
| Correction of lagophthalmos                                           | 1                           | 0.0%                          | 0.0                                      | 0.0%               | 0.0%                       | 0.0%                               |
| Correction of lid retraction                                          | 1                           | 0.0%                          | 0.0                                      | 0.0%               | 0.0%                       | 0.0%                               |
| Dissection of vitreous strands (without removal), pars plana approach | 1                           | 0.0%                          | 0.0                                      | 0.0%               | 0.0%                       | 0.0%                               |
| Drainage of extraperitoneal lymphocele to peritoneal cavity - open    | 1                           | 0.0%                          | 0.0                                      | 0.0%               | 0.0%                       | 0.0%                               |
| Drainage of retroperitoneal abscess - open                            | 1                           | 0.0%                          | 0.0                                      | 0.0%               | 0.0%                       | 0.0%                               |
| Duodenotomy                                                           | 1                           | 0.0%                          | 0.0                                      | 0.0%               | 0.0%                       | 0.0%                               |
| Ectopic pregnancy surgery                                             | 1                           | 0.0%                          | 0.0                                      | 0.0%               | 0.0%                       | 0.0%                               |
| Elbow ligament reconstruction                                         | 1                           | 0.0%                          | 0.0                                      | 0.0%               | 0.0%                       | 0.0%                               |
| Esophagectomy                                                         | 1                           | 0.0%                          | 0.0                                      | 0.0%               | 0.0%                       | 0.0%                               |
| Esophagogastrostomy                                                   | 1                           | 0.0%                          | 0.0                                      | 0.0%               | 0.0%                       | 0.0%                               |
| Esophagojejunostomy                                                   | 1                           | 0.0%                          | 0.0                                      | 0.0%               | 0.0%                       | 0.0%                               |
| Exchange of intraocular lens                                          | 1                           | 0.0%                          | 0.0                                      | 0.0%               | 0.0%                       | 0.0%                               |
| Excision of aural glomus tumor                                        | 1                           | 0.0%                          | 0.0                                      | 0.0%               | 0.0%                       | 0.0%                               |
| Excision of carotid body tumor                                        | 1                           | 0.0%                          | 0.0                                      | 0.0%               | 0.0%                       | 0.0%                               |
| Excision of cyst or adenoma of thyroid, or transection of isthmus     | 1                           | 0.0%                          | 0.0                                      | 0.0%               | 0.0%                       | 0.0%                               |
| Excision of intra and extracranial benign tumor of cranial bone       | 1                           | 0.0%                          | 0.0                                      | 0.0%               | 0.0%                       | 0.0%                               |
| Excision of lacrimal sac                                              | 1                           | 0.0%                          | 0.0                                      | 0.0%               | 0.0%                       | 0.0%                               |
| Excision of lesion of pancreas (eg, cyst, adenoma)                    | 1                           | 0.0%                          | 0.0                                      | 0.0%               | 0.0%                       | 0.0%                               |
| Excision of pelvic pressure ulcer                                     | 1                           | 0.0%                          | 0.0                                      | 0.0%               | 0.0%                       | 0.0%                               |
| Excision of tonsil tags                                               | 1                           | 0.0%                          | 0.0                                      | 0.0%               | 0.0%                       | 0.0%                               |
| Excision of trochanteric bursa or calcification                       | 1                           | 0.0%                          | 0.0                                      | 0.0%               | 0.0%                       | 0.0%                               |
| Excision or unroofing of cyst(s) of kidney                            | 1                           | 0.0%                          | 0.0                                      | 0.0%               | 0.0%                       | 0.0%                               |
| Exploration of orbit (transcranial approach)                          | 1                           | 0.0%                          | 0.0                                      | 0.0%               | 0.0%                       | 0.0%                               |
| Gingivoplasty                                                         | 1                           | 0.0%                          | 0.0                                      | 0.0%               | 0.0%                       | 0.0%                               |
| Incision and drainage of appendiceal abscess - open                   | 1                           | 0.0%                          | 0.0                                      | 0.0%               | 0.0%                       | 0.0%                               |
| Infratemporal pre-auricular approach to middle cranial fossa          | 1                           | 0.0%                          | 0.0                                      | 0.0%               | 0.0%                       | 0.0%                               |
| Intracranial aneurysm repair - open                                   | 1                           | 0.0%                          | 0.0                                      | 0.0%               | 0.0%                       | 0.0%                               |
| Krukenberg procedure                                                  | 1                           | 0.0%                          | 0.0                                      | 0.0%               | 0.0%                       | 0.0%                               |
| Laparoscopic salpingostomy                                            | 1                           | 0.0%                          | 0.0                                      | 0.0%               | 0.0%                       | 0.0%                               |
| Laryngectomy, pharyngectomy, pharyngolaryngectomy                     | 1                           | 0.0%                          | 0.0                                      | 0.0%               | 0.0%                       | 0.0%                               |
| Ligation or banding of angioaccess arteriovenous fistula              | 1                           | 0.0%                          | 0.0                                      | 0.0%               | 0.0%                       | 0.0%                               |
| Liver debridement                                                     | 1                           | 0.0%                          | 0.0                                      | 0.0%               | 0.0%                       | 0.0%                               |
| Lysis of adhesions (salpingolysis, ovariolysis)                       | 1                           | 0.0%                          | 0.0                                      | 0.0%               | 0.0%                       | 0.0%                               |
| Myomectomy, anorectal                                                 | 1                           | 0.0%                          | 0.0                                      | 0.0%               | 0.0%                       | 0.0%                               |
| Open treatment of rib fracture                                        | 1                           | 0.0%                          | 0.0                                      | 0.0%               | 0.0%                       | 0.0%                               |
| Ostectomy of scapula                                                  | 1                           | 0.0%                          | 0.0                                      | 0.0%               | 0.0%                       | 0.0%                               |
| Patellectomy or hemipatellectomy                                      | 1                           | 0.0%                          | 0.0                                      | 0.0%               | 0.0%                       | 0.0%                               |
| Penile prostheses                                                     | 1                           | 0.0%                          | 0.0                                      | 0.0%               | 0.0%                       | 0.0%                               |
| Ptosis correction                                                     | 1                           | 0.0%                          | 0.0                                      | 0.0%               | 0.0%                       | 0.0%                               |
| Radical excision of bursa, synovia of wrist, or forearm               | 1                           | 0.0%                          | 0.0                                      | 0.0%               | 0.0%                       | 0.0%                               |
| Reconstruction of hand contracture release                            | 1                           | 0.0%                          | 0.0                                      | 0.0%               | 0.0%                       | 0.0%                               |
| Reconstruction of tendon pulley; finger                               | 1                           | 0.0%                          | 0.0                                      | 0.0%               | 0.0%                       | 0.0%                               |
| Removal of entire lumbosubarachnoid shunt system without replacement  | 1                           | 0.0%                          | 0.0                                      | 0.0%               | 0.0%                       | 0.0%                               |
| Removal of hip prosthesis                                             | 1                           | 0.0%                          | 0.0                                      | 0.0%               | 0.0%                       | 0.0%                               |
| Removal of implant from finger or hand                                | 1                           | 0.0%                          | 0.0                                      | 0.0%               | 0.0%                       | 0.0%                               |
| Repair of anterior palate, including vomer flap                       | 1                           | 0.0%                          | 0.0                                      | 0.0%               | 0.0%                       | 0.0%                               |

**SUPPLEMENTAL TABLE 6** Continued

| <b>Procedure</b>                                                                                                               | <b>Number of procedures</b> | <b>Opioid dispensing rate</b> | <b>Mean MMEs per dispensed opioid Rx</b> | <b>Refill rate</b> | <b>Share of total MMEs</b> | <b>Share of surgical opioid Rx</b> |
|--------------------------------------------------------------------------------------------------------------------------------|-----------------------------|-------------------------------|------------------------------------------|--------------------|----------------------------|------------------------------------|
| Repair of cardiac wound                                                                                                        | 1                           | 0.0%                          | 0.0                                      | 0.0%               | 0.0%                       | 0.0%                               |
| Repair of dural/cerebrospinal fluid leak or pseudomeningocele, with laminectomy                                                | 1                           | 0.0%                          | 0.0                                      | 0.0%               | 0.0%                       | 0.0%                               |
| Repair of iris, ciliary body                                                                                                   | 1                           | 0.0%                          | 0.0                                      | 0.0%               | 0.0%                       | 0.0%                               |
| Repair of postinfarction ventricular septal defect                                                                             | 1                           | 0.0%                          | 0.0                                      | 0.0%               | 0.0%                       | 0.0%                               |
| Repair of pulmonary artery arborization anomalies by unifocalization                                                           | 1                           | 0.0%                          | 0.0                                      | 0.0%               | 0.0%                       | 0.0%                               |
| Repair of single ventricle with aortic outflow obstruction and aortic arch hypoplasia                                          | 1                           | 0.0%                          | 0.0                                      | 0.0%               | 0.0%                       | 0.0%                               |
| Replacement of tissue expander with permanent prosthesis                                                                       | 1                           | 0.0%                          | 0.0                                      | 0.0%               | 0.0%                       | 0.0%                               |
| Replacement of ventricular assist device                                                                                       | 1                           | 0.0%                          | 0.0                                      | 0.0%               | 0.0%                       | 0.0%                               |
| Repositioning of intraocular lens prosthesis, requiring an incision                                                            | 1                           | 0.0%                          | 0.0                                      | 0.0%               | 0.0%                       | 0.0%                               |
| Resection of diaphragm                                                                                                         | 1                           | 0.0%                          | 0.0                                      | 0.0%               | 0.0%                       | 0.0%                               |
| Resection of mediastinal cyst                                                                                                  | 1                           | 0.0%                          | 0.0                                      | 0.0%               | 0.0%                       | 0.0%                               |
| Resection of ribs, extrapleural, all stages                                                                                    | 1                           | 0.0%                          | 0.0                                      | 0.0%               | 0.0%                       | 0.0%                               |
| Revision and/or thrombectomy of arteriovenous fistula                                                                          | 1                           | 0.0%                          | 0.0                                      | 0.0%               | 0.0%                       | 0.0%                               |
| Revision of stapedectomy or stapedotomy                                                                                        | 1                           | 0.0%                          | 0.0                                      | 0.0%               | 0.0%                       | 0.0%                               |
| Salpingectomy                                                                                                                  | 1                           | 0.0%                          | 0.0                                      | 0.0%               | 0.0%                       | 0.0%                               |
| Secondary revision of orbitocraniofacial reconstruction                                                                        | 1                           | 0.0%                          | 0.0                                      | 0.0%               | 0.0%                       | 0.0%                               |
| Septal or other intranasal dermatoplasty                                                                                       | 1                           | 0.0%                          | 0.0                                      | 0.0%               | 0.0%                       | 0.0%                               |
| Sequestrectomy of bone in upper extremity                                                                                      | 1                           | 0.0%                          | 0.0                                      | 0.0%               | 0.0%                       | 0.0%                               |
| Shunt; central, with prosthetic graft                                                                                          | 1                           | 0.0%                          | 0.0                                      | 0.0%               | 0.0%                       | 0.0%                               |
| Spine bony resection                                                                                                           | 1                           | 0.0%                          | 0.0                                      | 0.0%               | 0.0%                       | 0.0%                               |
| Stapes mobilization                                                                                                            | 1                           | 0.0%                          | 0.0                                      | 0.0%               | 0.0%                       | 0.0%                               |
| Stereotactic localization, including burr hole(s), with insertion of catheter(s) or probe(s) for placement of radiation source | 1                           | 0.0%                          | 0.0                                      | 0.0%               | 0.0%                       | 0.0%                               |
| Suture of mesentery                                                                                                            | 1                           | 0.0%                          | 0.0                                      | 0.0%               | 0.0%                       | 0.0%                               |
| Suture of tracheal wound or injury                                                                                             | 1                           | 0.0%                          | 0.0                                      | 0.0%               | 0.0%                       | 0.0%                               |
| Suture or repair of testicular injury                                                                                          | 1                           | 0.0%                          | 0.0                                      | 0.0%               | 0.0%                       | 0.0%                               |
| Sympathectomy                                                                                                                  | 1                           | 0.0%                          | 0.0                                      | 0.0%               | 0.0%                       | 0.0%                               |
| Synovectomy, foot                                                                                                              | 1                           | 0.0%                          | 0.0                                      | 0.0%               | 0.0%                       | 0.0%                               |
| Thoracostomy, chest drainage with rib resection or flap                                                                        | 1                           | 0.0%                          | 0.0                                      | 0.0%               | 0.0%                       | 0.0%                               |
| Thoracotomy, with cardiac massage                                                                                              | 1                           | 0.0%                          | 0.0                                      | 0.0%               | 0.0%                       | 0.0%                               |
| Thoracotomy, with pulmonary decortication                                                                                      | 1                           | 0.0%                          | 0.0                                      | 0.04%              | 0.0%                       | 0.0%                               |
| Thoracotomy, with removal of intrapleural foreign body or fibrin deposit                                                       | 1                           | 0.0%                          | 0.0                                      | 0.0%               | 0.0%                       | 0.0%                               |
| Transcatheter placement of intravascular stent - open                                                                          | 1                           | 0.0%                          | 0.0                                      | 0.0%               | 0.0%                       | 0.0%                               |
| Transurethral resection of prostate                                                                                            | 1                           | 0.0%                          | 0.0                                      | 0.0%               | 0.0%                       | 0.0%                               |
| Ureterolithotomy - open                                                                                                        | 1                           | 0.0%                          | 0.0                                      | 0.0%               | 0.0%                       | 0.0%                               |
| Ureteroplasty                                                                                                                  | 1                           | 0.0%                          | 0.0                                      | 0.0%               | 0.0%                       | 0.0%                               |

| <b>SUPPLEMENTAL TABLE 7</b> Top 10 Procedures by Share of total MMEs Among Children Aged 0–11 Years, by Payer Type |                             |                               |                                                    |                                                              |
|--------------------------------------------------------------------------------------------------------------------|-----------------------------|-------------------------------|----------------------------------------------------|--------------------------------------------------------------|
| <b>Privately insured children aged 0-11 y</b>                                                                      |                             |                               |                                                    |                                                              |
| <b>Procedure</b>                                                                                                   | <b>Number of procedures</b> | <b>Opioid dispensing rate</b> | <b>Mean MMEs per dispensed opioid prescription</b> | <b>Share of dispensed opioid prescriptions in the sample</b> |
| Tonsillectomy and/or adenoidectomy                                                                                 | 12 269                      | 17.3%                         | 22.5                                               | 33.7%                                                        |
| Open treatment of fracture, upper extremity                                                                        | 753                         | 46.9%                         | 37.6                                               | 5.6%                                                         |
| Removal of implant; deep (eg, buried wire, pin, screw, metal band, nail, rod or plate)                             | 670                         | 27.9%                         | 22.9                                               | 3.0%                                                         |
| Appendectomy - laparoscopic                                                                                        | 1324                        | 11.0%                         | 9.8                                                | 2.3%                                                         |
| Orchiopexy                                                                                                         | 1174                        | 27.9%                         | 10.5                                               | 5.2%                                                         |
| Tympanoplasty                                                                                                      | 476                         | 22.7%                         | 18.9                                               | 1.7%                                                         |
| Arthroscopy of knee                                                                                                | 106                         | 64.2%                         | 69.0                                               | 1.1%                                                         |
| Open treatment of fracture, lower extremity                                                                        | 147                         | 44.2%                         | 47.1                                               | 1.0%                                                         |
| Open treatment of fracture, hip or pelvis                                                                          | 145                         | 47.6%                         | 47.3                                               | 1.1%                                                         |
| Strabismus surgery                                                                                                 | 2156                        | 2.7%                          | 2.5                                                | 0.9%                                                         |
| <b>Publicly insured children aged 0-11 y</b>                                                                       |                             |                               |                                                    |                                                              |
| <b>Procedure</b>                                                                                                   | <b>Number of procedures</b> | <b>Opioid dispensing rate</b> | <b>Mean MMEs per dispensed opioid prescription</b> | <b>Share of dispensed opioid prescriptions in the sample</b> |
| Tonsillectomy and/or adenoidectomy                                                                                 | 16 104                      | 22%                           | 31.5                                               | 32.0%                                                        |
| Open treatment of fracture, upper extremity                                                                        | 743                         | 56%                           | 72.4                                               | 3.8%                                                         |
| Removal of implant; deep (eg, buried wire, pin, screw, metal band, nail, rod or plate)                             | 824                         | 44%                           | 47.8                                               | 3.3%                                                         |
| Osteotomy of lower extremity                                                                                       | 312                         | 67%                           | 120.9                                              | 1.9%                                                         |
| Epiphyseal or hemiepiphyseal arrest, lower extremity                                                               | 189                         | 76%                           | 134.4                                              | 1.3%                                                         |
| Appendectomy - laparoscopic                                                                                        | 1574                        | 15%                           | 11.7                                               | 2.2%                                                         |
| Plastic operation of penis to correct chordee or angulation                                                        | 1615                        | 32%                           | 11.2                                               | 4.7%                                                         |
| Open treatment of fracture, lower extremity                                                                        | 170                         | 66%                           | 93.0                                               | 1.0%                                                         |
| Orchiopexy                                                                                                         | 1571                        | 29%                           | 9.8                                                | 4.2%                                                         |
| Open treatment of fracture, hip or pelvis                                                                          | 176                         | 56%                           | 70.3                                               | 0.9%                                                         |

**SUPPLEMENTAL TABLE 8** Full Results for Patients Aged 12–21 Years

| Procedure                                                                                                         | Number of procedures | Opioid dispensing rate | Mean MMEs per dispensed opioid Rx | Refill rate | Share of total MMEs | Share of surgical opioid Rx |
|-------------------------------------------------------------------------------------------------------------------|----------------------|------------------------|-----------------------------------|-------------|---------------------|-----------------------------|
| Tonsillectomy and/or adenoidectomy                                                                                | 9360                 | 57.9%                  | 158.7                             | 9.6%        | 12.7%               | 9.8%                        |
| Arthroscopy of knee                                                                                               | 11 224               | 53.7%                  | 131.0                             | 3.7%        | 12.6%               | 10.8%                       |
| Cesarean section                                                                                                  | 7520                 | 58.8%                  | 121.0                             | 2.3%        | 7.8%                | 8.0%                        |
| Open treatment of fracture, lower extremity                                                                       | 3913                 | 55.6%                  | 143.8                             | 6.2%        | 4.8%                | 3.9%                        |
| Open treatment of fracture, upper extremity                                                                       | 4648                 | 57.7%                  | 120.1                             | 2.9%        | 4.8%                | 4.8%                        |
| Rhinoplasty                                                                                                       | 4016                 | 54.3%                  | 116.7                             | 1.5%        | 4.0%                | 3.9%                        |
| Arthroscopy of shoulder                                                                                           | 3252                 | 51.7%                  | 141.5                             | 3.8%        | 3.9%                | 3.0%                        |
| Cholecystectomy - laparoscopic                                                                                    | 3853                 | 62.9%                  | 114.2                             | 2.4%        | 3.8%                | 4.4%                        |
| Appendectomy - laparoscopic                                                                                       | 6541                 | 42.2%                  | 65.4                              | 0.7%        | 3.7%                | 5.0%                        |
| Ligamentous reconstruction (augmentation), knee                                                                   | 1724                 | 58.7%                  | 169.6                             | 6.5%        | 2.5%                | 1.8%                        |
| Removal of implant; deep (eg, buried wire, pin, screw, metal band, nail, rod or plate)                            | 3278                 | 45.8%                  | 78.2                              | 0.8%        | 2.2%                | 2.7%                        |
| Excision of pilonidal cyst or sinus                                                                               | 2059                 | 56.4%                  | 96.0                              | 4.0%        | 1.7%                | 2.1%                        |
| Arthrodesis of spine                                                                                              | 1215                 | 49.7%                  | 131.5                             | 6.7%        | 1.4%                | 1.1%                        |
| Open treatment of clavicle fracture                                                                               | 1159                 | 50.5%                  | 135.4                             | 2.3%        | 1.3%                | 1.1%                        |
| Laparoscopic fulguration or excision of lesions of the ovary, pelvic viscera, or peritoneal surface by any method | 1573                 | 59.5%                  | 96.8                              | 1.8%        | 1.3%                | 1.7%                        |
| Mammaplasty, augmentation                                                                                         | 1502                 | 54.1%                  | 95.3                              | 2.2%        | 1.2%                | 1.5%                        |
| Osteotomy of lower extremity                                                                                      | 804                  | 61.6%                  | 174.8                             | 7.3%        | 1.2%                | 0.9%                        |
| Arthroscopy of hip                                                                                                | 971                  | 50.5%                  | 144.0                             | 3.3%        | 1.2%                | 0.9%                        |
| Correction of hallux rigidus                                                                                      | 849                  | 54.3%                  | 133.9                             | 6.8%        | 1.0%                | 0.8%                        |
| Excision of bone cyst or benign tumor with or without bone grafting                                               | 849                  | 60.4%                  | 132.0                             | 2.1%        | 1.0%                | 0.9%                        |
| Open treatment of fracture, hip or pelvis                                                                         | 569                  | 55.7%                  | 161.9                             | 12.1%       | 0.8%                | 0.6%                        |
| Excision of ganglion, wrist                                                                                       | 1042                 | 50.0%                  | 74.9                              | 0.7%        | 0.7%                | 0.9%                        |
| Open treatment of facial fractures                                                                                | 548                  | 52.4%                  | 140.0                             | 2.7%        | 0.7%                | 0.5%                        |
| Laminectomy/corpectomy                                                                                            | 502                  | 54.2%                  | 151.7                             | 6.0%        | 0.7%                | 0.5%                        |
| Reconstruction of nonunion or malunion, upper extremity                                                           | 454                  | 68.3%                  | 152.0                             | 2.2%        | 0.6%                | 0.6%                        |
| Arthroscopy of ankle or foot                                                                                      | 423                  | 58.4%                  | 151.5                             | 5.2%        | 0.5%                | 0.4%                        |
| Epiphyseal or hemiepiphyseal arrest, lower extremity                                                              | 466                  | 68.7%                  | 134.1                             | 0.6%        | 0.5%                | 0.6%                        |
| Nerve decompression                                                                                               | 600                  | 55.5%                  | 104.0                             | 2.7%        | 0.5%                | 0.6%                        |
| Reconstruction of dislocating patella                                                                             | 454                  | 52.6%                  | 129.8                             | 7.5%        | 0.5%                | 0.4%                        |
| Hysterectomy - laparoscopic or vaginal                                                                            | 401                  | 63.3%                  | 138.7                             | 3.0%        | 0.5%                | 0.5%                        |
| Tympanoplasty                                                                                                     | 841                  | 45.8%                  | 65.2                              | 1.1%        | 0.5%                | 0.7%                        |
| Repair of disrupted ligament, ankle                                                                               | 459                  | 49.2%                  | 110.2                             | 4.4%        | 0.4%                | 0.4%                        |
| Excision of breast lesion                                                                                         | 1088                 | 42.6%                  | 44.9                              | 0.6%        | 0.4%                | 0.8%                        |
| Reconstruction of face                                                                                            | 459                  | 50.8%                  | 105.0                             | 4.1%        | 0.4%                | 0.4%                        |
| Lumpectomy or mastectomy                                                                                          | 535                  | 55.0%                  | 86.9                              | 1.7%        | 0.4%                | 0.5%                        |
| Reconstructive repair of pectus excavatum or carinatum                                                            | 282                  | 56.7%                  | 154.2                             | 7.1%        | 0.4%                | 0.3%                        |
| Reconstruction of foot                                                                                            | 323                  | 60.4%                  | 127.7                             | 6.5%        | 0.4%                | 0.4%                        |
| Hernia repair, inguinal/femoral - laparoscopic                                                                    | 404                  | 62.9%                  | 101.3                             | 1.0%        | 0.3%                | 0.5%                        |
| Hernia repair, inguinal/femoral - open                                                                            | 428                  | 56.1%                  | 94.7                              | 2.6%        | 0.3%                | 0.4%                        |
| Graft of bone or cartilage to face                                                                                | 627                  | 47.2%                  | 57.7                              | 1.3%        | 0.3%                | 0.5%                        |
| Hand tendon repair                                                                                                | 323                  | 58.2%                  | 110.5                             | 1.9%        | 0.3%                | 0.3%                        |
| Bone resection                                                                                                    | 324                  | 54.3%                  | 104.5                             | 4.0%        | 0.3%                | 0.3%                        |
| Arthrodesis of lower extremity                                                                                    | 231                  | 48.1%                  | 145.4                             | 8.7%        | 0.3%                | 0.2%                        |
| Inferior turbinate resection or excision                                                                          | 614                  | 34.9%                  | 53.2                              | 0.3%        | 0.3%                | 0.4%                        |
| Tendon repair, upper extremity                                                                                    | 342                  | 49.4%                  | 92.5                              | 1.5%        | 0.3%                | 0.3%                        |
| Excision of facial bone or tumor/cyst in facial bone                                                              | 578                  | 54.5%                  | 53.8                              | 1.0%        | 0.3%                | 0.6%                        |
| Excision of soft tissue lesion                                                                                    | 654                  | 30.6%                  | 44.2                              | 0.9%        | 0.2%                | 0.4%                        |
| Tendon lengthening or shortening, lower extremity                                                                 | 283                  | 60.4%                  | 101.6                             | 3.2%        | 0.2%                | 0.3%                        |
| Tendon repair, lower extremity                                                                                    | 233                  | 54.9%                  | 122.6                             | 5.6%        | 0.2%                | 0.2%                        |

**SUPPLEMENTAL TABLE 8** Continued

| <b>Procedure</b>                                                                | <b>Number of procedures</b> | <b>Opioid dispensing rate</b> | <b>Mean MMEs per dispensed opioid Rx</b> | <b>Refill rate</b> | <b>Share of total MMEs</b> | <b>Share of surgical opioid Rx</b> |
|---------------------------------------------------------------------------------|-----------------------------|-------------------------------|------------------------------------------|--------------------|----------------------------|------------------------------------|
| Hernia repair, abdominal - open                                                 | 395                         | 44.3%                         | 71.8                                     | 0.5%               | 0.2%                       | 0.3%                               |
| Reduction of torsion of testis                                                  | 634                         | 50.6%                         | 44.5                                     | 0.3%               | 0.2%                       | 0.6%                               |
| Repair or reconstruction of collateral ligament, hand and/or fingers            | 270                         | 61.1%                         | 103.9                                    | 2.2%               | 0.2%                       | 0.3%                               |
| Nerve repair                                                                    | 222                         | 54.5%                         | 121.2                                    | 3.2%               | 0.2%                       | 0.2%                               |
| Bone graft procedure                                                            | 247                         | 52.6%                         | 104.4                                    | 2.4%               | 0.2%                       | 0.2%                               |
| Orchiopexy                                                                      | 573                         | 48.2%                         | 44.1                                     | 0.9%               | 0.2%                       | 0.5%                               |
| Skin graft                                                                      | 396                         | 39.6%                         | 63.8                                     | 5.6%               | 0.2%                       | 0.3%                               |
| Repair of fistula, oronasal or oromaxillary                                     | 204                         | 75.5%                         | 121.5                                    | 2.0%               | 0.2%                       | 0.3%                               |
| Craniectomy or craniotomy                                                       | 349                         | 39.5%                         | 67.8                                     | 4.0%               | 0.2%                       | 0.2%                               |
| Arthroplasty of hip                                                             | 61                          | 70.5%                         | 387.7                                    | 23.0%              | 0.2%                       | 0.1%                               |
| Repair of ruptured Achilles tendon                                              | 165                         | 56.4%                         | 142.7                                    | 1.8%               | 0.2%                       | 0.2%                               |
| Ostectomy of foot and/or toes                                                   | 189                         | 54.5%                         | 123.1                                    | 3.7%               | 0.2%                       | 0.2%                               |
| Debridement of skin, muscle, or bone                                            | 357                         | 32.8%                         | 62.0                                     | 2.5%               | 0.2%                       | 0.2%                               |
| Gastric bypass                                                                  | 265                         | 41.9%                         | 83.1                                     | 1.1%               | 0.2%                       | 0.2%                               |
| Excision or curettage of bone cyst or benign tumor                              | 145                         | 63.4%                         | 147.6                                    | 2.1%               | 0.2%                       | 0.2%                               |
| Decompression fasciotomy of lower extremity                                     | 163                         | 54.0%                         | 128.3                                    | 7.4%               | 0.2%                       | 0.2%                               |
| Open treatment of slipped femoral epiphysis                                     | 178                         | 60.7%                         | 115.1                                    | 1.7%               | 0.2%                       | 0.2%                               |
| Thyroidectomy, with or without lymphadenectomy                                  | 283                         | 44.5%                         | 71.7                                     | 1.1%               | 0.2%                       | 0.2%                               |
| Laparoscopic abdominal procedure                                                | 219                         | 52.1%                         | 90.9                                     | 1.4%               | 0.2%                       | 0.2%                               |
| Adjacent tissue transfer or rearrangement                                       | 904                         | 18.3%                         | 21.3                                     | 0.6%               | 0.2%                       | 0.3%                               |
| Arthrotomy of lower extremity                                                   | 143                         | 42.7%                         | 130.1                                    | 6.3%               | 0.2%                       | 0.1%                               |
| Osteochondral allograft, knee - open                                            | 122                         | 54.1%                         | 152.4                                    | 4.1%               | 0.2%                       | 0.1%                               |
| Arthroscopy of wrist                                                            | 206                         | 55.8%                         | 87.0                                     | 2.9%               | 0.2%                       | 0.2%                               |
| Gastrocnemius recession                                                         | 133                         | 60.2%                         | 131.9                                    | 3.8%               | 0.2%                       | 0.1%                               |
| Tendon transfer, lower extremity                                                | 130                         | 63.1%                         | 134.2                                    | 4.6%               | 0.1%                       | 0.1%                               |
| Ectopic pregnancy surgery                                                       | 178                         | 63.5%                         | 91.9                                     | 3.9%               | 0.1%                       | 0.2%                               |
| Arthroscopy of elbow                                                            | 196                         | 51.0%                         | 82.4                                     | 0.0%               | 0.1%                       | 0.2%                               |
| Strabismus surgery                                                              | 1540                        | 9.9%                          | 10.4                                     | 0.2%               | 0.1%                       | 0.3%                               |
| Suture of infrapatellar tendon                                                  | 130                         | 55.4%                         | 117.1                                    | 5.4%               | 0.1%                       | 0.1%                               |
| Elbow ligament reconstruction                                                   | 155                         | 41.9%                         | 96.9                                     | 1.3%               | 0.1%                       | 0.1%                               |
| Varicocele repair                                                               | 264                         | 51.5%                         | 54.3                                     | 0.8%               | 0.1%                       | 0.2%                               |
| Capsulorrhaphy, shoulder                                                        | 128                         | 47.7%                         | 110.9                                    | 6.3%               | 0.1%                       | 0.1%                               |
| Biopsy or excision of lymph node(s)                                             | 336                         | 36.3%                         | 41.6                                     | 1.8%               | 0.1%                       | 0.2%                               |
| Arthrodesis of upper extremity                                                  | 61                          | 68.9%                         | 221.4                                    | 9.8%               | 0.1%                       | 0.1%                               |
| Osteotomy of upper extremity                                                    | 134                         | 61.9%                         | 99.8                                     | 7.5%               | 0.1%                       | 0.1%                               |
| Laparoscopic lysis of adhesions                                                 | 84                          | 57.1%                         | 154.1                                    | 3.6%               | 0.1%                       | 0.1%                               |
| Ovarian cystectomy                                                              | 95                          | 56.8%                         | 133.2                                    | 1.1%               | 0.1%                       | 0.1%                               |
| Open treatment of spinal fracture                                               | 80                          | 60.0%                         | 156.5                                    | 15.0%              | 0.1%                       | 0.1%                               |
| Reconstruction of mandible or maxilla                                           | 145                         | 53.1%                         | 86.1                                     | 3.4%               | 0.1%                       | 0.1%                               |
| Palatoplasty                                                                    | 118                         | 44.1%                         | 104.9                                    | 3.4%               | 0.1%                       | 0.1%                               |
| Implantation, removal, or replacement of osseointegrated implant, temporal bone | 104                         | 57.7%                         | 117.4                                    | 2.9%               | 0.1%                       | 0.1%                               |
| Suture of quadriceps or hamstring muscle rupture                                | 76                          | 63.2%                         | 156.8                                    | 7.9%               | 0.1%                       | 0.1%                               |
| Excision of hydrocele                                                           | 202                         | 50.0%                         | 58.1                                     | 1.5%               | 0.1%                       | 0.2%                               |
| Vulvectomy                                                                      | 190                         | 51.6%                         | 61.3                                     | 3.2%               | 0.1%                       | 0.2%                               |
| Flap reconstruction                                                             | 105                         | 49.5%                         | 109.8                                    | 3.8%               | 0.1%                       | 0.1%                               |
| Lateral retinacular release - open                                              | 60                          | 75.0%                         | 186.3                                    | 6.7%               | 0.1%                       | 0.1%                               |
| Nephrectomy - laparoscopic                                                      | 122                         | 55.7%                         | 86.8                                     | 4.9%               | 0.1%                       | 0.1%                               |
| Fixation of contralateral testis                                                | 237                         | 57.0%                         | 44.6                                     | 0.0%               | 0.1%                       | 0.2%                               |
| Excision of salivary tumor or salivary gland                                    | 115                         | 49.6%                         | 91.7                                     | 2.6%               | 0.1%                       | 0.1%                               |
| Capsulorrhaphy or reconstruction, wrist                                         | 65                          | 64.6%                         | 160.8                                    | 4.6%               | 0.1%                       | 0.1%                               |

**SUPPLEMENTAL TABLE 8** Continued

| <b>Procedure</b>                                                                                                 | <b>Number of procedures</b> | <b>Opioid dispensing rate</b> | <b>Mean MMEs per dispensed opioid Rx</b> | <b>Refill rate</b> | <b>Share of total MMEs</b> | <b>Share of surgical opioid Rx</b> |
|------------------------------------------------------------------------------------------------------------------|-----------------------------|-------------------------------|------------------------------------------|--------------------|----------------------------|------------------------------------|
| Sesamoidectomy, first toe                                                                                        | 60                          | 63.3%                         | 174.0                                    | 6.7%               | 0.1%                       | 0.1%                               |
| Hernia repair, abdominal - laparoscopic                                                                          | 72                          | 56.9%                         | 141.4                                    | 2.8%               | 0.1%                       | 0.1%                               |
| Amputation of upper extremity                                                                                    | 103                         | 52.4%                         | 98.0                                     | 3.9%               | 0.1%                       | 0.1%                               |
| Thoracoscopy, with pleurodesis                                                                                   | 169                         | 40.8%                         | 58.9                                     | 2.4%               | 0.1%                       | 0.1%                               |
| Osteoplasty of upper extremity                                                                                   | 60                          | 75.0%                         | 164.1                                    | 1.7%               | 0.1%                       | 0.1%                               |
| Arthrotomy of upper extremity                                                                                    | 109                         | 46.8%                         | 90.0                                     | 3.7%               | 0.1%                       | 0.1%                               |
| Exploration of penetrating wound                                                                                 | 183                         | 27.3%                         | 53.4                                     | 2.2%               | 0.1%                       | 0.1%                               |
| Tenolysis, upper extremity                                                                                       | 105                         | 52.4%                         | 87.9                                     | 1.9%               | 0.1%                       | 0.1%                               |
| Excision of lesion of tendon sheath or joint capsule, hand or finger                                             | 182                         | 45.1%                         | 50.3                                     | 1.1%               | 0.1%                       | 0.1%                               |
| Excision or destruction of lingual tonsil, any method (separate procedure)                                       | 51                          | 52.9%                         | 173.3                                    | 3.9%               | 0.1%                       | 0.0%                               |
| Incision for implantation of cranial nerve (eg, vagus nerve) neurostimulator electrode array and pulse generator | 88                          | 42.0%                         | 100.2                                    | 1.1%               | 0.1%                       | 0.1%                               |
| Tenolysis, lower extremity                                                                                       | 125                         | 43.2%                         | 69.6                                     | 2.4%               | 0.1%                       | 0.1%                               |
| Excision of lesion, tendon, tendon sheath, or capsule; foot                                                      | 84                          | 51.2%                         | 99.5                                     | 2.4%               | 0.1%                       | 0.1%                               |
| Surgical treatment of anal fistula                                                                               | 76                          | 47.4%                         | 105.0                                    | 2.6%               | 0.1%                       | 0.1%                               |
| Orchiectomy - open                                                                                               | 185                         | 56.2%                         | 43.1                                     | 2.7%               | 0.1%                       | 0.2%                               |
| Lymphadenectomy                                                                                                  | 102                         | 53.9%                         | 76.8                                     | 4.9%               | 0.1%                       | 0.1%                               |
| Incision of tendon sheath of wrist                                                                               | 95                          | 70.5%                         | 81.3                                     | 3.2%               | 0.1%                       | 0.1%                               |
| Drainage of breast abscess                                                                                       | 84                          | 36.9%                         | 91.8                                     | 1.2%               | 0.1%                       | 0.1%                               |
| Carpal tunnel release, endoscopic                                                                                | 44                          | 70.5%                         | 175.2                                    | 2.3%               | 0.1%                       | 0.1%                               |
| Intestinal procedure, resection and anastomosis - open                                                           | 88                          | 36.4%                         | 81.4                                     | 3.4%               | 0.1%                       | 0.1%                               |
| Tenotomy, lower extremity                                                                                        | 106                         | 39.6%                         | 66.0                                     | 1.9%               | 0.1%                       | 0.1%                               |
| Plastic operation of penis to correct chordee or angulation                                                      | 135                         | 54.1%                         | 51.7                                     | 1.5%               | 0.1%                       | 0.1%                               |
| Cochlear device implantation                                                                                     | 93                          | 57.0%                         | 70.5                                     | 2.2%               | 0.1%                       | 0.1%                               |
| Laparoscopic intestinal procedure                                                                                | 60                          | 36.7%                         | 107.1                                    | 0.0%               | 0.1%                       | 0.0%                               |
| Tendon transfer, upper extremity                                                                                 | 54                          | 70.4%                         | 118.4                                    | 1.9%               | 0.1%                       | 0.1%                               |
| CSF shunt                                                                                                        | 208                         | 24.5%                         | 30.2                                     | 1.4%               | 0.1%                       | 0.1%                               |
| Reconstruction of nonunion or malunion, lower extremity                                                          | 57                          | 52.6%                         | 110.2                                    | 8.8%               | 0.1%                       | 0.1%                               |
| Osteotomy of pelvis                                                                                              | 53                          | 54.7%                         | 117.4                                    | 7.5%               | 0.1%                       | 0.1%                               |
| Capsulectomy or capsulotomy, hand                                                                                | 38                          | 71.1%                         | 160.8                                    | 2.6%               | 0.1%                       | 0.0%                               |
| Radical resection of tumor, soft tissue                                                                          | 71                          | 36.6%                         | 84.0                                     | 2.8%               | 0.1%                       | 0.0%                               |
| Application of external fixation system                                                                          | 60                          | 46.7%                         | 99.2                                     | 8.3%               | 0.1%                       | 0.1%                               |
| Colectomy and/or proctectomy - laparoscopic                                                                      | 129                         | 34.9%                         | 46.0                                     | 0.8%               | 0.1%                       | 0.1%                               |
| Osteoplasty of lower extremity                                                                                   | 72                          | 54.2%                         | 80.7                                     | 11.1%              | 0.0%                       | 0.1%                               |
| Salpingo-oophorectomy                                                                                            | 50                          | 58.0%                         | 114.9                                    | 4.0%               | 0.0%                       | 0.1%                               |
| Amputation of lower extremity                                                                                    | 62                          | 51.6%                         | 88.6                                     | 9.7%               | 0.0%                       | 0.1%                               |
| Intestinal procedure, resection and closure of enterostomy                                                       | 67                          | 43.3%                         | 80.6                                     | 4.5%               | 0.0%                       | 0.1%                               |
| Laparoscopic liver procedure                                                                                     | 31                          | 48.4%                         | 168.0                                    | 3.2%               | 0.0%                       | 0.0%                               |
| Exploratory laparotomy                                                                                           | 44                          | 29.5%                         | 117.3                                    | 6.8%               | 0.0%                       | 0.0%                               |
| Reinsertion of spinal fixation device                                                                            | 54                          | 57.4%                         | 94.9                                     | 5.6%               | 0.0%                       | 0.1%                               |
| Implantable cardiac device procedures                                                                            | 142                         | 40.8%                         | 35.3                                     | 0.7%               | 0.0%                       | 0.1%                               |
| Lipectomy, with or without excessive skin removal                                                                | 70                          | 50.0%                         | 68.8                                     | 5.7%               | 0.0%                       | 0.1%                               |
| Secondary closure of surgical wound or dehiscence                                                                | 64                          | 32.8%                         | 73.6                                     | 6.3%               | 0.0%                       | 0.0%                               |
| Genioplasty                                                                                                      | 59                          | 49.2%                         | 79.6                                     | 6.8%               | 0.0%                       | 0.1%                               |
| Repair of nonunion or malunion, foot bones                                                                       | 53                          | 60.4%                         | 88.5                                     | 3.8%               | 0.0%                       | 0.1%                               |
| Osteotomy of clavicle                                                                                            | 18                          | 77.8%                         | 257.2                                    | 0.0%               | 0.0%                       | 0.0%                               |
| Nasal septum reconstruction                                                                                      | 46                          | 60.9%                         | 99.7                                     | 4.3%               | 0.0%                       | 0.1%                               |
| Excision of thyroglossal duct cyst or sinus                                                                      | 59                          | 50.8%                         | 76.3                                     | 1.7%               | 0.0%                       | 0.1%                               |
| Fasciectomy or fasciotomy                                                                                        | 67                          | 55.2%                         | 66.8                                     | 1.5%               | 0.0%                       | 0.1%                               |
| Excision or destruction - intra-abdominal tumors, cysts or endometriomas                                         | 39                          | 64.1%                         | 114.6                                    | 7.7%               | 0.0%                       | 0.0%                               |

**SUPPLEMENTAL TABLE 8** Continued

| <b>Procedure</b>                                                                                 | <b>Number of procedures</b> | <b>Opioid dispensing rate</b> | <b>Mean MMEs per dispensed opioid Rx</b> | <b>Refill rate</b> | <b>Share of total MMEs</b> | <b>Share of surgical opioid Rx</b> |
|--------------------------------------------------------------------------------------------------|-----------------------------|-------------------------------|------------------------------------------|--------------------|----------------------------|------------------------------------|
| Colectomy and/or proctectomy - open                                                              | 89                          | 37.1%                         | 49.8                                     | 4.5%               | 0.0%                       | 0.1%                               |
| Hypospadias repair                                                                               | 57                          | 52.6%                         | 76.0                                     | 0.0%               | 0.0%                       | 0.1%                               |
| Thoracotomy, with control of traumatic hemorrhage and/or repair of lung tear                     | 14                          | 42.9%                         | 304.1                                    | 7.1%               | 0.0%                       | 0.0%                               |
| Insertion or replacement of cranial neurostimulator pulse generator or receiver                  | 102                         | 35.3%                         | 40.9                                     | 1.0%               | 0.0%                       | 0.1%                               |
| Lengthening of hamstring tendon                                                                  | 50                          | 58.0%                         | 83.3                                     | 6.0%               | 0.0%                       | 0.1%                               |
| Removal of instrumentation in spine                                                              | 41                          | 51.2%                         | 101.2                                    | 4.9%               | 0.0%                       | 0.0%                               |
| Gender affirming procedure, male to female                                                       | 11                          | 27.3%                         | 369.1                                    | 9.1%               | 0.0%                       | 0.0%                               |
| Reconstruction of toe                                                                            | 27                          | 48.1%                         | 149.2                                    | 0.0%               | 0.0%                       | 0.0%                               |
| Excision of extraparenchymal lesion of testis                                                    | 116                         | 43.1%                         | 34.5                                     | 1.7%               | 0.0%                       | 0.1%                               |
| Laparoscopic repair of paraesophageal hernia                                                     | 42                          | 42.9%                         | 93.4                                     | 4.8%               | 0.0%                       | 0.0%                               |
| Appendectomy - open                                                                              | 120                         | 31.7%                         | 32.3                                     | 0.0%               | 0.0%                       | 0.1%                               |
| Laryngoscopy, with tumor excision, with or without reconstruction                                | 146                         | 20.5%                         | 26.4                                     | 1.4%               | 0.0%                       | 0.1%                               |
| Closure of enterostomy                                                                           | 41                          | 41.5%                         | 91.3                                     | 2.4%               | 0.0%                       | 0.0%                               |
| Arthroplasty of temporomandibular joint                                                          | 28                          | 60.7%                         | 131.4                                    | 3.6%               | 0.0%                       | 0.0%                               |
| Excision of urachal cyst or sinus                                                                | 15                          | 40.0%                         | 243.0                                    | 0.0%               | 0.0%                       | 0.0%                               |
| Acetabuloplasty                                                                                  | 15                          | 80.0%                         | 241.0                                    | 20.0%              | 0.0%                       | 0.0%                               |
| Excision of neuroma, neurofibroma, or neurolemmoma                                               | 62                          | 41.9%                         | 57.8                                     | 0.0%               | 0.0%                       | 0.0%                               |
| Arthroplasty of knee                                                                             | 21                          | 57.1%                         | 166.1                                    | 14.3%              | 0.0%                       | 0.0%                               |
| Cranioplasty                                                                                     | 69                          | 42.0%                         | 50.1                                     | 0.0%               | 0.0%                       | 0.1%                               |
| Laparoscopic esophagus fundoplasty                                                               | 44                          | 29.5%                         | 77.2                                     | 0.0%               | 0.0%                       | 0.0%                               |
| Excision of lesion of tendon sheath or capsule (eg, cyst or ganglion), leg and/or ankle          | 36                          | 55.6%                         | 94.2                                     | 2.8%               | 0.0%                       | 0.0%                               |
| Synovectomy, hand                                                                                | 39                          | 66.7%                         | 86.5                                     | 5.1%               | 0.0%                       | 0.0%                               |
| Reconstruction of external auditory canal                                                        | 36                          | 47.2%                         | 91.3                                     | 2.8%               | 0.0%                       | 0.0%                               |
| Embolectomy or thrombectomy                                                                      | 11                          | 81.8%                         | 294.1                                    | 27.3%              | 0.0%                       | 0.0%                               |
| Sphincteroplasty, anal                                                                           | 29                          | 55.2%                         | 111.3                                    | 3.4%               | 0.0%                       | 0.0%                               |
| Orbitotomy                                                                                       | 56                          | 23.2%                         | 56.3                                     | 0.0%               | 0.0%                       | 0.0%                               |
| Excision of branchial cleft cyst, vestige, or fistula                                            | 95                          | 30.5%                         | 32.2                                     | 1.1%               | 0.0%                       | 0.1%                               |
| Splenectomy - laparoscopic                                                                       | 25                          | 64.0%                         | 121.6                                    | 0.0%               | 0.0%                       | 0.0%                               |
| Radical resection of capsule, soft tissue, and heterotopic bone, elbow, with contracture release | 19                          | 68.4%                         | 159.9                                    | 0.0%               | 0.0%                       | 0.0%                               |
| Aortic valve repair/replacement - open                                                           | 25                          | 44.0%                         | 120.3                                    | 4.0%               | 0.0%                       | 0.0%                               |
| Dacryocystorhinostomy                                                                            | 16                          | 31.3%                         | 187.2                                    | 0.0%               | 0.0%                       | 0.0%                               |
| Transcatheter placement of intravascular stent - percutaneous or open                            | 115                         | 11.3%                         | 26.0                                     | 0.0%               | 0.0%                       | 0.0%                               |
| Arteriovenous fistula creation or reconstruction                                                 | 37                          | 64.9%                         | 80.3                                     | 0.0%               | 0.0%                       | 0.0%                               |
| Repair of primary, torn ligament and/or capsule, knee                                            | 21                          | 33.3%                         | 138.2                                    | 4.8%               | 0.0%                       | 0.0%                               |
| Glossectomy                                                                                      | 10                          | 60.0%                         | 283.5                                    | 0.0%               | 0.0%                       | 0.0%                               |
| Suture or repair of testicular injury                                                            | 28                          | 46.4%                         | 100.7                                    | 0.0%               | 0.0%                       | 0.0%                               |
| Quadriicepsplasty (eg, Bennett or Thompson type)                                                 | 23                          | 91.3%                         | 122.1                                    | 8.7%               | 0.0%                       | 0.0%                               |
| Arthroplasty of forearm or hand                                                                  | 24                          | 54.2%                         | 113.8                                    | 0.0%               | 0.0%                       | 0.0%                               |
| Enucleation of eye                                                                               | 9                           | 55.6%                         | 303.3                                    | 0.0%               | 0.0%                       | 0.0%                               |
| Exploration of artery without surgical repair                                                    | 27                          | 55.6%                         | 100.5                                    | 7.4%               | 0.0%                       | 0.0%                               |
| Carpectomy                                                                                       | 24                          | 41.7%                         | 110.6                                    | 0.0%               | 0.0%                       | 0.0%                               |
| Graft of fat or other tissue                                                                     | 101                         | 32.7%                         | 26.0                                     | 0.0%               | 0.0%                       | 0.1%                               |
| Biceps tenodesis or reconstruction                                                               | 19                          | 36.8%                         | 134.7                                    | 5.3%               | 0.0%                       | 0.0%                               |
| Mastopexy                                                                                        | 15                          | 80.0%                         | 170.6                                    | 6.7%               | 0.0%                       | 0.0%                               |
| Removal of implant; superficial (eg, buried wire, pin or rod)                                    | 525                         | 5.5%                          | 4.8                                      | 0.2%               | 0.0%                       | 0.1%                               |
| Cerclage of cervix, during pregnancy                                                             | 98                          | 7.1%                          | 25.7                                     | 0.0%               | 0.0%                       | 0.0%                               |

**SUPPLEMENTAL TABLE 8** Continued

| <b>Procedure</b>                                                          | <b>Number of procedures</b> | <b>Opioid dispensing rate</b> | <b>Mean MMEs per dispensed opioid Rx</b> | <b>Refill rate</b> | <b>Share of total MMEs</b> | <b>Share of surgical opioid Rx</b> |
|---------------------------------------------------------------------------|-----------------------------|-------------------------------|------------------------------------------|--------------------|----------------------------|------------------------------------|
| Pulmonary valve repair/replacement - open                                 | 27                          | 44.4%                         | 90.8                                     | 3.7%               | 0.0%                       | 0.0%                               |
| Rib excision                                                              | 41                          | 48.8%                         | 58.2                                     | 2.4%               | 0.0%                       | 0.0%                               |
| Exploration of spinal fusion                                              | 26                          | 38.5%                         | 90.8                                     | 0.0%               | 0.0%                       | 0.0%                               |
| Tendon lengthening or shortening, upper extremity                         | 35                          | 51.4%                         | 66.5                                     | 2.9%               | 0.0%                       | 0.0%                               |
| Hysterectomy - open abdominal                                             | 12                          | 50.0%                         | 192.7                                    | 0.0%               | 0.0%                       | 0.0%                               |
| Fissurectomy                                                              | 30                          | 60.0%                         | 75.8                                     | 6.7%               | 0.0%                       | 0.0%                               |
| Thymectomy, with or without lymphadenectomy                               | 5                           | 40.0%                         | 454.5                                    | 0.0%               | 0.0%                       | 0.0%                               |
| Ligation of blood vessels                                                 | 30                          | 43.3%                         | 75.7                                     | 6.7%               | 0.0%                       | 0.0%                               |
| Repair of blepharoptosis                                                  | 166                         | 19.3%                         | 13.6                                     | 0.0%               | 0.0%                       | 0.1%                               |
| Repair of retinal detachment                                              | 198                         | 14.6%                         | 11.3                                     | 0.0%               | 0.0%                       | 0.1%                               |
| Urethroplasty                                                             | 42                          | 52.4%                         | 53.3                                     | 2.4%               | 0.0%                       | 0.0%                               |
| Fracture of nasal inferior turbinate(s)                                   | 90                          | 21.1%                         | 24.7                                     | 0.0%               | 0.0%                       | 0.0%                               |
| Repair of encephalocele, skull vault, including cranioplasty              | 2                           | 100.0%                        | 1100.0                                   | 0.0%               | 0.0%                       | 0.0%                               |
| Salpingectomy                                                             | 19                          | 52.6%                         | 114.2                                    | 0.0%               | 0.0%                       | 0.0%                               |
| Incision and drainage, thigh or knee region                               | 51                          | 29.4%                         | 42.3                                     | 0.0%               | 0.0%                       | 0.0%                               |
| Laryngectomy, pharyngectomy, pharyngolaryngectomy                         | 3                           | 66.7%                         | 717.0                                    | 0.0%               | 0.0%                       | 0.0%                               |
| Repair of dural/cerebrospinal fluid leak, not requiring laminectomy       | 6                           | 66.7%                         | 354.8                                    | 0.0%               | 0.0%                       | 0.0%                               |
| Patellectomy or hemipatellectomy                                          | 38                          | 50.0%                         | 56.0                                     | 0.0%               | 0.0%                       | 0.0%                               |
| Synovectomy, foot                                                         | 10                          | 50.0%                         | 210.0                                    | 10.0%              | 0.0%                       | 0.0%                               |
| Revision and/or thrombectomy of arteriovenous fistula                     | 9                           | 66.7%                         | 233.3                                    | 11.1%              | 0.0%                       | 0.0%                               |
| Colpoperineorrhaphy                                                       | 5                           | 20.0%                         | 410.0                                    | 0.0%               | 0.0%                       | 0.0%                               |
| Tubercleplasty of anterior tibia                                          | 22                          | 40.9%                         | 91.1                                     | 9.1%               | 0.0%                       | 0.0%                               |
| Oophrectomy                                                               | 26                          | 50.0%                         | 77.0                                     | 0.0%               | 0.0%                       | 0.0%                               |
| Repair of tunica vaginalis hydrocele                                      | 25                          | 52.0%                         | 79.3                                     | 0.0%               | 0.0%                       | 0.0%                               |
| Umbilectomy, omphalectomy, excision of umbilicus                          | 25                          | 56.0%                         | 78.2                                     | 0.0%               | 0.0%                       | 0.0%                               |
| Excision of trochanteric bursa or calcification                           | 12                          | 75.0%                         | 162.9                                    | 0.0%               | 0.0%                       | 0.0%                               |
| Mastoidectomy                                                             | 28                          | 28.6%                         | 69.1                                     | 0.0%               | 0.0%                       | 0.0%                               |
| Insertion of testicular prosthesis                                        | 35                          | 54.3%                         | 54.9                                     | 0.0%               | 0.0%                       | 0.0%                               |
| Decompression fasciotomy of upper extremity                               | 25                          | 52.0%                         | 75.5                                     | 12.0%              | 0.0%                       | 0.0%                               |
| Tarsal tunnel release                                                     | 15                          | 73.3%                         | 124.0                                    | 6.7%               | 0.0%                       | 0.0%                               |
| Intestinal procedure, ileostomy or jejunostomy                            | 16                          | 31.3%                         | 116.2                                    | 0.0%               | 0.0%                       | 0.0%                               |
| Resection of ribs, extrapleural, all stages                               | 16                          | 56.3%                         | 114.4                                    | 25.0%              | 0.0%                       | 0.0%                               |
| Excision of tendon of hand or finger                                      | 15                          | 73.3%                         | 120.8                                    | 13.3%              | 0.0%                       | 0.0%                               |
| Excision of lesion of meniscus or capsule, knee                           | 24                          | 62.5%                         | 75.4                                     | 0.0%               | 0.0%                       | 0.0%                               |
| Tricuspid or Mitral valve repair/reconstruction - open                    | 21                          | 71.4%                         | 85.6                                     | 0.0%               | 0.0%                       | 0.0%                               |
| Epiphyseal arrest by epiphysodesis or stapling; distal radius and/or ulna | 28                          | 57.1%                         | 63.5                                     | 0.0%               | 0.0%                       | 0.0%                               |
| Excision of vaginal cyst or tumor                                         | 38                          | 47.4%                         | 45.1                                     | 7.9%               | 0.0%                       | 0.0%                               |
| Tissue expander placement, excluding breast                               | 16                          | 68.8%                         | 106.3                                    | 0.0%               | 0.0%                       | 0.0%                               |
| Alveoloplasty                                                             | 29                          | 55.2%                         | 58.0                                     | 0.0%               | 0.0%                       | 0.0%                               |
| Diaphragmatic repair                                                      | 21                          | 52.4%                         | 78.3                                     | 4.8%               | 0.0%                       | 0.0%                               |
| Laparoscopic hernia repair                                                | 4                           | 75.0%                         | 408.8                                    | 0.0%               | 0.0%                       | 0.0%                               |
| Laparoscopic fulguration of oviducts (with or without transection)        | 22                          | 63.6%                         | 74.1                                     | 4.5%               | 0.0%                       | 0.0%                               |
| Enterolysis - open                                                        | 30                          | 23.3%                         | 54.2                                     | 10.0%              | 0.0%                       | 0.0%                               |
| Thoracoscopy, with partial or complete lung removal                       | 39                          | 28.2%                         | 41.5                                     | 0.0%               | 0.0%                       | 0.0%                               |
| Intracranial arteriovenous malformation repair                            | 25                          | 36.0%                         | 64.4                                     | 4.0%               | 0.0%                       | 0.0%                               |
| Incision of bone cortex, pelvis and lower extremity                       | 30                          | 20.0%                         | 52.5                                     | 6.7%               | 0.0%                       | 0.0%                               |
| Tympanostomy                                                              | 1173                        | 1.8%                          | 1.3                                      | 0.0%               | 0.0%                       | 0.0%                               |
| Enterolysis - laparoscopic                                                | 45                          | 28.9%                         | 34.5                                     | 0.0%               | 0.0%                       | 0.0%                               |
| Repair of syndactyly                                                      | 17                          | 64.7%                         | 91.0                                     | 0.0%               | 0.0%                       | 0.0%                               |
| Cholecystectomy - open                                                    | 17                          | 41.2%                         | 90.7                                     | 11.8%              | 0.0%                       | 0.0%                               |

**SUPPLEMENTAL TABLE 8** Continued

| <b>Procedure</b>                                                                | <b>Number of procedures</b> | <b>Opioid dispensing rate</b> | <b>Mean MMEs per dispensed opioid Rx</b> | <b>Refill rate</b> | <b>Share of total MMEs</b> | <b>Share of surgical opioid Rx</b> |
|---------------------------------------------------------------------------------|-----------------------------|-------------------------------|------------------------------------------|--------------------|----------------------------|------------------------------------|
| Incision and drainage of rectal, perirectal, or perianal abscess                | 21                          | 47.6%                         | 72.5                                     | 4.8%               | 0.0%                       | 0.0%                               |
| Incision and drainage of abscess, cyst, or hematoma of tongue or floor of mouth | 31                          | 35.5%                         | 48.7                                     | 0.0%               | 0.0%                       | 0.0%                               |
| Nephrectomy - open                                                              | 14                          | 50.0%                         | 107.5                                    | 0.0%               | 0.0%                       | 0.0%                               |
| Excision of lesion of mesentery                                                 | 2                           | 50.0%                         | 750.0                                    | 0.0%               | 0.0%                       | 0.0%                               |
| Exenteration of orbit                                                           | 1                           | 100.0%                        | 1500.0                                   | 0.0%               | 0.0%                       | 0.0%                               |
| Resection of mediastinal tumor                                                  | 7                           | 71.4%                         | 212.1                                    | 14.3%              | 0.0%                       | 0.0%                               |
| Perineoplasty, repair of perineum, nonobstetrical                               | 14                          | 42.9%                         | 104.5                                    | 0.0%               | 0.0%                       | 0.0%                               |
| Incision and drainage, leg or ankle                                             | 29                          | 31.0%                         | 49.8                                     | 3.4%               | 0.0%                       | 0.0%                               |
| Claviclectomy                                                                   | 14                          | 35.7%                         | 101.8                                    | 0.0%               | 0.0%                       | 0.0%                               |
| Trigger finger release                                                          | 50                          | 34.0%                         | 27.7                                     | 0.0%               | 0.0%                       | 0.0%                               |
| Ventriculomyotomy (-myectomy) for idiopathic hypertrophic subaortic stenosis    | 7                           | 42.9%                         | 197.1                                    | 0.0%               | 0.0%                       | 0.0%                               |
| Repair of atrial and/or ventricular septal defects                              | 23                          | 34.8%                         | 59.6                                     | 8.7%               | 0.0%                       | 0.0%                               |
| Autologous chondrocyte implantation, knee                                       | 23                          | 30.4%                         | 57.7                                     | 0.0%               | 0.0%                       | 0.0%                               |
| Excision of radial head                                                         | 13                          | 53.8%                         | 102.1                                    | 0.0%               | 0.0%                       | 0.0%                               |
| Excision of frenum, labial or buccal                                            | 101                         | 18.8%                         | 13.1                                     | 0.0%               | 0.0%                       | 0.0%                               |
| Cataract removal                                                                | 160                         | 3.1%                          | 8.2                                      | 0.0%               | 0.0%                       | 0.0%                               |
| Division of scalenus anticus                                                    | 11                          | 45.5%                         | 117.7                                    | 0.0%               | 0.0%                       | 0.0%                               |
| Radical resection of tumor, bone                                                | 7                           | 71.4%                         | 184.8                                    | 0.0%               | 0.0%                       | 0.0%                               |
| Excision of lesion of mucosa and submucosa, vestibule of mouth                  | 61                          | 19.7%                         | 20.8                                     | 0.0%               | 0.0%                       | 0.0%                               |
| Conjunctival flap                                                               | 33                          | 30.3%                         | 38.0                                     | 0.0%               | 0.0%                       | 0.0%                               |
| Augmentation of mandibular body or angle                                        | 3                           | 100.0%                        | 413.3                                    | 33.3%              | 0.0%                       | 0.0%                               |
| Thoracoscopy, with pulmonary decortication                                      | 18                          | 27.8%                         | 66.9                                     | 0.0%               | 0.0%                       | 0.0%                               |
| Muscle repair, hand                                                             | 5                           | 40.0%                         | 238.0                                    | 0.0%               | 0.0%                       | 0.0%                               |
| Splenectomy - open                                                              | 22                          | 50.0%                         | 53.8                                     | 13.6%              | 0.0%                       | 0.0%                               |
| Removal of synthetic rod and insertion of tendon graft in hand or finger        | 9                           | 66.7%                         | 130.0                                    | 0.0%               | 0.0%                       | 0.0%                               |
| Repair of blood vessel                                                          | 27                          | 37.0%                         | 42.2                                     | 7.4%               | 0.0%                       | 0.0%                               |
| Removal of foreign body, shoulder                                               | 6                           | 66.7%                         | 190.0                                    | 33.3%              | 0.0%                       | 0.0%                               |
| Excision of spermatocele, with or without epididymectomy                        | 27                          | 44.4%                         | 41.9                                     | 3.7%               | 0.0%                       | 0.0%                               |
| Excision of Bartholin's gland or cyst                                           | 24                          | 50.0%                         | 47.2                                     | 0.0%               | 0.0%                       | 0.0%                               |
| Laparoscopic ovarian procedure                                                  | 15                          | 13.3%                         | 75.0                                     | 0.0%               | 0.0%                       | 0.0%                               |
| Breast reconstruction                                                           | 16                          | 62.5%                         | 70.2                                     | 0.0%               | 0.0%                       | 0.0%                               |
| Frenoplasty                                                                     | 61                          | 19.7%                         | 18.3                                     | 0.0%               | 0.0%                       | 0.0%                               |
| Laparoscopic stomach procedure                                                  | 18                          | 27.8%                         | 60.0                                     | 0.0%               | 0.0%                       | 0.0%                               |
| Stapedectomy or stapedotomy                                                     | 20                          | 45.0%                         | 53.5                                     | 0.0%               | 0.0%                       | 0.0%                               |
| Repair of ruptured musculotendinous cuff - open                                 | 6                           | 66.7%                         | 177.5                                    | 0.0%               | 0.0%                       | 0.0%                               |
| Resection of bone tumor                                                         | 7                           | 85.7%                         | 151.8                                    | 0.0%               | 0.0%                       | 0.0%                               |
| Radical excision of bursa, synovia of wrist, or forearm                         | 9                           | 77.8%                         | 116.1                                    | 0.0%               | 0.0%                       | 0.0%                               |
| Gastrorrhaphy, suture of perforated duodenal or gastric ulcer, wound, or injury | 24                          | 37.5%                         | 43.1                                     | 4.2%               | 0.0%                       | 0.0%                               |
| Ureteroneocystostomy                                                            | 22                          | 68.2%                         | 46.5                                     | 4.5%               | 0.0%                       | 0.0%                               |
| Parathyroidectomy                                                               | 36                          | 38.9%                         | 27.4                                     | 0.0%               | 0.0%                       | 0.0%                               |
| Spine bony resection                                                            | 9                           | 77.8%                         | 108.9                                    | 0.0%               | 0.0%                       | 0.0%                               |
| Division of sternocleidomastoid                                                 | 4                           | 50.0%                         | 243.8                                    | 0.0%               | 0.0%                       | 0.0%                               |
| Capsulotomy, foot and/or toes                                                   | 23                          | 39.1%                         | 42.1                                     | 8.7%               | 0.0%                       | 0.0%                               |
| Open treatment of rib fracture                                                  | 11                          | 45.5%                         | 86.6                                     | 9.1%               | 0.0%                       | 0.0%                               |
| Exploration, retroperitoneal area with or without biopsy(s)                     | 11                          | 54.5%                         | 86.4                                     | 9.1%               | 0.0%                       | 0.0%                               |
| Uvulectomy, excision of uvula                                                   | 21                          | 33.3%                         | 45.0                                     | 9.5%               | 0.0%                       | 0.0%                               |

**SUPPLEMENTAL TABLE 8** Continued

| <b>Procedure</b>                                                                      | <b>Number of procedures</b> | <b>Opioid dispensing rate</b> | <b>Mean MMEs per dispensed opioid Rx</b> | <b>Refill rate</b> | <b>Share of total MMEs</b> | <b>Share of surgical opioid Rx</b> |
|---------------------------------------------------------------------------------------|-----------------------------|-------------------------------|------------------------------------------|--------------------|----------------------------|------------------------------------|
| Excision of vaginal septum                                                            | 69                          | 23.2%                         | 13.5                                     | 0.0%               | 0.0%                       | 0.0%                               |
| Thoracoscopy, with sympathectomy                                                      | 17                          | 47.1%                         | 54.9                                     | 0.0%               | 0.0%                       | 0.0%                               |
| Cystotomy or cystostomy                                                               | 15                          | 33.3%                         | 62.1                                     | 0.0%               | 0.0%                       | 0.0%                               |
| Revision of urinary-cutaneous anastomosis                                             | 15                          | 13.3%                         | 61.0                                     | 0.0%               | 0.0%                       | 0.0%                               |
| Arthroplasty of spine                                                                 | 5                           | 80.0%                         | 183.0                                    | 40.0%              | 0.0%                       | 0.0%                               |
| Laparoscopic occlusion of oviducts by device (eg, band, clip, or Falope ring)         | 16                          | 56.3%                         | 56.3                                     | 0.0%               | 0.0%                       | 0.0%                               |
| Prophylactic treatment (nailing, pinning, plating or wiring) of bone, lower extremity | 15                          | 53.3%                         | 59.8                                     | 0.0%               | 0.0%                       | 0.0%                               |
| Lung resection                                                                        | 13                          | 46.2%                         | 68.8                                     | 7.7%               | 0.0%                       | 0.0%                               |
| Pancreatectomy                                                                        | 12                          | 50.0%                         | 74.4                                     | 16.7%              | 0.0%                       | 0.0%                               |
| Thoracotomy, with exploration                                                         | 10                          | 60.0%                         | 88.5                                     | 10.0%              | 0.0%                       | 0.0%                               |
| Thoracoscopy, excision of pericardial or mediastinal mass                             | 17                          | 29.4%                         | 51.6                                     | 5.9%               | 0.0%                       | 0.0%                               |
| Osteotomy of facial bones                                                             | 15                          | 53.3%                         | 58.3                                     | 6.7%               | 0.0%                       | 0.0%                               |
| Palatopharyngoplasty                                                                  | 15                          | 40.0%                         | 57.4                                     | 6.7%               | 0.0%                       | 0.0%                               |
| Revision of reconstructed breast                                                      | 13                          | 61.5%                         | 65.7                                     | 0.0%               | 0.0%                       | 0.0%                               |
| Transfer of tendon of fingers                                                         | 6                           | 100.0%                        | 140.0                                    | 16.7%              | 0.0%                       | 0.0%                               |
| Cartilage graft                                                                       | 14                          | 50.0%                         | 59.4                                     | 0.0%               | 0.0%                       | 0.0%                               |
| Replacement of tissue expander with permanent prosthesis                              | 8                           | 62.5%                         | 103.1                                    | 0.0%               | 0.0%                       | 0.0%                               |
| Keratoplasty                                                                          | 48                          | 27.1%                         | 16.5                                     | 4.2%               | 0.0%                       | 0.0%                               |
| Excision of lip                                                                       | 42                          | 26.2%                         | 18.7                                     | 0.0%               | 0.0%                       | 0.0%                               |
| Prophylactic treatment (nailing, pinning, plating or wiring) of bone, upper extremity | 12                          | 75.0%                         | 64.0                                     | 0.0%               | 0.0%                       | 0.0%                               |
| Laryngoplasty                                                                         | 13                          | 84.6%                         | 58.7                                     | 7.7%               | 0.0%                       | 0.0%                               |
| Scapulopexy                                                                           | 3                           | 100.0%                        | 253.3                                    | 0.0%               | 0.0%                       | 0.0%                               |
| Destruction of lesion(s), anus                                                        | 16                          | 50.0%                         | 47.0                                     | 6.3%               | 0.0%                       | 0.0%                               |
| Infratemporal pre-auricular approach to middle cranial fossa                          | 6                           | 100.0%                        | 125.3                                    | 0.0%               | 0.0%                       | 0.0%                               |
| Colostomy - open                                                                      | 9                           | 11.1%                         | 83.3                                     | 0.0%               | 0.0%                       | 0.0%                               |
| Excision of lacrimal gland or lacrimal gland tumor                                    | 2                           | 50.0%                         | 375.0                                    | 0.0%               | 0.0%                       | 0.0%                               |
| Trachelectomy, with or without lymph node dissection                                  | 1                           | 100.0%                        | 750.0                                    | 0.0%               | 0.0%                       | 0.0%                               |
| Nerve transection                                                                     | 14                          | 57.1%                         | 53.4                                     | 0.0%               | 0.0%                       | 0.0%                               |
| Urethrotomy                                                                           | 99                          | 15.2%                         | 7.5                                      | 0.0%               | 0.0%                       | 0.0%                               |
| Cleft lip repair                                                                      | 36                          | 30.6%                         | 20.3                                     | 0.0%               | 0.0%                       | 0.0%                               |
| Temporary closure of eyelids by suture                                                | 17                          | 29.4%                         | 42.5                                     | 0.0%               | 0.0%                       | 0.0%                               |
| Arterial transposition                                                                | 6                           | 50.0%                         | 120.0                                    | 16.7%              | 0.0%                       | 0.0%                               |
| Resection or excision of neoplastic, vascular or infectious lesion, intracranial      | 19                          | 42.1%                         | 37.5                                     | 0.0%               | 0.0%                       | 0.0%                               |
| Laparoscopic appendix procedure                                                       | 9                           | 11.1%                         | 77.8                                     | 0.0%               | 0.0%                       | 0.0%                               |
| Repair of complex cardiac anomalies                                                   | 25                          | 36.0%                         | 27.9                                     | 8.0%               | 0.0%                       | 0.0%                               |
| Excision of lesion or tumor, dentoalveolar structures                                 | 16                          | 56.3%                         | 42.9                                     | 6.3%               | 0.0%                       | 0.0%                               |
| Neuroendoscopy, intracranial                                                          | 28                          | 25.0%                         | 24.4                                     | 0.0%               | 0.0%                       | 0.0%                               |
| Exclusion or fulguration of urethra                                                   | 17                          | 35.3%                         | 39.7                                     | 5.9%               | 0.0%                       | 0.0%                               |
| Coronoidectomy                                                                        | 4                           | 50.0%                         | 168.8                                    | 0.0%               | 0.0%                       | 0.0%                               |
| Repair of atrioventricular canal                                                      | 3                           | 66.7%                         | 225.0                                    | 33.3%              | 0.0%                       | 0.0%                               |
| Laparoscopic gastrostomy, without construction of gastric tube                        | 78                          | 17.9%                         | 8.6                                      | 2.6%               | 0.0%                       | 0.0%                               |
| Ligation or transection of fallopian tube(s)                                          | 10                          | 50.0%                         | 66.8                                     | 0.0%               | 0.0%                       | 0.0%                               |
| Plastic repair of introitus                                                           | 12                          | 41.7%                         | 55.2                                     | 8.3%               | 0.0%                       | 0.0%                               |
| Laparotomy                                                                            | 7                           | 57.1%                         | 92.1                                     | 14.3%              | 0.0%                       | 0.0%                               |
| Excision of urethral diverticulum                                                     | 10                          | 60.0%                         | 63.5                                     | 10.0%              | 0.0%                       | 0.0%                               |
| Coccygectomy, primary                                                                 | 11                          | 45.5%                         | 55.9                                     | 9.1%               | 0.0%                       | 0.0%                               |

**SUPPLEMENTAL TABLE 8** Continued

| <b>Procedure</b>                                                                                  | <b>Number of procedures</b> | <b>Opioid dispensing rate</b> | <b>Mean MMEs per dispensed opioid Rx</b> | <b>Refill rate</b> | <b>Share of total MMEs</b> | <b>Share of surgical opioid Rx</b> |
|---------------------------------------------------------------------------------------------------|-----------------------------|-------------------------------|------------------------------------------|--------------------|----------------------------|------------------------------------|
| Injection of medication or other substance into Tenon's capsule                                   | 54                          | 1.9%                          | 11.1                                     | 0.0%               | 0.0%                       | 0.0%                               |
| Surgical closure tracheostomy or fistula, with or without plastic repair                          | 11                          | 9.1%                          | 54.5                                     | 0.0%               | 0.0%                       | 0.0%                               |
| Excision of local lesion of epididymis                                                            | 30                          | 40.0%                         | 19.8                                     | 0.0%               | 0.0%                       | 0.0%                               |
| Implantation, replacement, revision, removal of gastric neurostimulator electrodes - laparoscopic | 4                           | 100.0%                        | 146.3                                    | 0.0%               | 0.0%                       | 0.0%                               |
| Excision of external ear                                                                          | 3                           | 66.7%                         | 195.0                                    | 0.0%               | 0.0%                       | 0.0%                               |
| Division of aberrant vessel (vascular ring)                                                       | 7                           | 71.4%                         | 81.4                                     | 0.0%               | 0.0%                       | 0.0%                               |
| Excision of epiphyseal bar                                                                        | 7                           | 100.0%                        | 80.7                                     | 0.0%               | 0.0%                       | 0.0%                               |
| Resection of palate or extensive resection of lesion                                              | 5                           | 80.0%                         | 111.0                                    | 20.0%              | 0.0%                       | 0.0%                               |
| Liver transplantation                                                                             | 4                           | 50.0%                         | 138.8                                    | 0.0%               | 0.0%                       | 0.0%                               |
| Repair of anomalous coronary artery from pulmonary artery origin                                  | 14                          | 71.4%                         | 39.5                                     | 0.0%               | 0.0%                       | 0.0%                               |
| Thoracoscopy, with thymectomy                                                                     | 11                          | 54.5%                         | 50.0                                     | 9.1%               | 0.0%                       | 0.0%                               |
| Cutaneous appendico-vesicostomy                                                                   | 20                          | 45.0%                         | 27.3                                     | 0.0%               | 0.0%                       | 0.0%                               |
| Burr hole(s) or trephine                                                                          | 23                          | 8.7%                          | 23.5                                     | 0.0%               | 0.0%                       | 0.0%                               |
| Sympathectomy                                                                                     | 4                           | 50.0%                         | 135.0                                    | 0.0%               | 0.0%                       | 0.0%                               |
| Intestinal procedure, resection and anastomosis - laparoscopic                                    | 17                          | 35.3%                         | 31.5                                     | 0.0%               | 0.0%                       | 0.0%                               |
| Reconstruction of wrist                                                                           | 8                           | 75.0%                         | 66.3                                     | 12.5%              | 0.0%                       | 0.0%                               |
| Excision of lesion, cornea (keratectomy, lamellar, partial), except pterygium                     | 19                          | 36.8%                         | 27.3                                     | 0.0%               | 0.0%                       | 0.0%                               |
| Aneurysm/pseudoaneurysm repair                                                                    | 3                           | 100.0%                        | 171.0                                    | 0.0%               | 0.0%                       | 0.0%                               |
| Pharyngoplasty                                                                                    | 12                          | 50.0%                         | 42.6                                     | 0.0%               | 0.0%                       | 0.0%                               |
| Medianstomy                                                                                       | 5                           | 40.0%                         | 101.7                                    | 20.0%              | 0.0%                       | 0.0%                               |
| Removal of ankle implant                                                                          | 7                           | 57.1%                         | 71.4                                     | 0.0%               | 0.0%                       | 0.0%                               |
| Urethrectomy, total, including cystostomy                                                         | 1                           | 100.0%                        | 500.0                                    | 0.0%               | 0.0%                       | 0.0%                               |
| Ventriculocisternostomy, third ventricle                                                          | 23                          | 21.7%                         | 21.5                                     | 0.0%               | 0.0%                       | 0.0%                               |
| Breast implant                                                                                    | 14                          | 35.7%                         | 35.2                                     | 0.0%               | 0.0%                       | 0.0%                               |
| Resection of metatarsal or toe                                                                    | 11                          | 27.3%                         | 44.1                                     | 0.0%               | 0.0%                       | 0.0%                               |
| Endovascular revascularization, lower extremity                                                   | 11                          | 27.3%                         | 43.6                                     | 0.0%               | 0.0%                       | 0.0%                               |
| Excision of chest wall tumor, including ribs                                                      | 7                           | 42.9%                         | 67.9                                     | 0.0%               | 0.0%                       | 0.0%                               |
| Reconstruction of hand interphalangeal joint                                                      | 5                           | 100.0%                        | 95.0                                     | 0.0%               | 0.0%                       | 0.0%                               |
| Stereotactic biopsy, aspiration, or excision, including burr hole(s), for intracranial lesion     | 26                          | 11.5%                         | 18.1                                     | 3.8%               | 0.0%                       | 0.0%                               |
| Intestinal procedure, repair                                                                      | 15                          | 20.0%                         | 30.5                                     | 0.0%               | 0.0%                       | 0.0%                               |
| Extensor tendon centralization, hand                                                              | 10                          | 60.0%                         | 45.8                                     | 0.0%               | 0.0%                       | 0.0%                               |
| Transplantation of kidneys                                                                        | 22                          | 18.2%                         | 20.5                                     | 0.0%               | 0.0%                       | 0.0%                               |
| Tenotomy, upper extremity                                                                         | 12                          | 41.7%                         | 37.1                                     | 8.3%               | 0.0%                       | 0.0%                               |
| Stapes mobilization                                                                               | 6                           | 83.3%                         | 73.8                                     | 0.0%               | 0.0%                       | 0.0%                               |
| Repair of fascial defect of leg                                                                   | 5                           | 60.0%                         | 88.0                                     | 0.0%               | 0.0%                       | 0.0%                               |
| Colporrhaphy                                                                                      | 35                          | 20.0%                         | 12.4                                     | 0.0%               | 0.0%                       | 0.0%                               |
| Removal of peritoneal foreign body from peritoneal cavity                                         | 5                           | 60.0%                         | 87.0                                     | 20.0%              | 0.0%                       | 0.0%                               |
| Excision of presacral or sacrococcygeal tumor                                                     | 3                           | 100.0%                        | 145.0                                    | 33.3%              | 0.0%                       | 0.0%                               |
| Reconstruction of fingertip                                                                       | 26                          | 19.2%                         | 16.6                                     | 0.0%               | 0.0%                       | 0.0%                               |
| Closure of the lacrimal punctum                                                                   | 235                         | 1.3%                          | 1.8                                      | 0.4%               | 0.0%                       | 0.0%                               |
| Lengthening of palate                                                                             | 9                           | 44.4%                         | 47.7                                     | 0.0%               | 0.0%                       | 0.0%                               |
| Adrenalectomy - laparoscopic                                                                      | 13                          | 30.8%                         | 31.7                                     | 0.0%               | 0.0%                       | 0.0%                               |
| Drainage of ovarian cyst(s), abdominal approach                                                   | 7                           | 57.1%                         | 58.9                                     | 0.0%               | 0.0%                       | 0.0%                               |
| Excision of prepatellar bursa                                                                     | 15                          | 33.3%                         | 26.7                                     | 0.0%               | 0.0%                       | 0.0%                               |
| Ureteroureterostomy                                                                               | 3                           | 66.7%                         | 133.3                                    | 0.0%               | 0.0%                       | 0.0%                               |

**SUPPLEMENTAL TABLE 8** Continued

| <b>Procedure</b>                                                                                                            | <b>Number of procedures</b> | <b>Opioid dispensing rate</b> | <b>Mean MMEs per dispensed opioid Rx</b> | <b>Refill rate</b> | <b>Share of total MMEs</b> | <b>Share of surgical opioid Rx</b> |
|-----------------------------------------------------------------------------------------------------------------------------|-----------------------------|-------------------------------|------------------------------------------|--------------------|----------------------------|------------------------------------|
| Excision of rectal tumor, transanal, transsacral, transcoccygeal                                                            | 10                          | 50.0%                         | 39.8                                     | 10.0%              | 0.0%                       | 0.0%                               |
| Cystolithotomy, cystotomy with removal of calculus                                                                          | 11                          | 63.6%                         | 35.5                                     | 0.0%               | 0.0%                       | 0.0%                               |
| Drainage of peritoneal abscess - open                                                                                       | 7                           | 57.1%                         | 55.4                                     | 0.0%               | 0.0%                       | 0.0%                               |
| Orchiectomy - laparoscopic                                                                                                  | 13                          | 38.5%                         | 29.4                                     | 0.0%               | 0.0%                       | 0.0%                               |
| Cystorrhaphy, suture of bladder wound, injury or rupture                                                                    | 10                          | 30.0%                         | 36.5                                     | 0.0%               | 0.0%                       | 0.0%                               |
| Implantation or replacement of electromagnetic bone conduction hearing device in temporal bone                              | 7                           | 71.4%                         | 51.8                                     | 0.0%               | 0.0%                       | 0.0%                               |
| Debridement of sternum                                                                                                      | 2                           | 100.0%                        | 180.0                                    | 50.0%              | 0.0%                       | 0.0%                               |
| Sinusotomy, with or without reconstruction                                                                                  | 7                           | 42.9%                         | 50.4                                     | 0.0%               | 0.0%                       | 0.0%                               |
| Resection or incision of subvalvular tissue for discrete subvalvular aortic stenosis                                        | 12                          | 33.3%                         | 28.1                                     | 0.0%               | 0.0%                       | 0.0%                               |
| Tenodesis, hand                                                                                                             | 4                           | 75.0%                         | 83.8                                     | 25.0%              | 0.0%                       | 0.0%                               |
| Plastic repair of salivary duct, sialodochoplasty                                                                           | 7                           | 42.9%                         | 47.8                                     | 0.0%               | 0.0%                       | 0.0%                               |
| Vestibuloplasty                                                                                                             | 4                           | 50.0%                         | 82.5                                     | 0.0%               | 0.0%                       | 0.0%                               |
| Scrotoplasty                                                                                                                | 8                           | 50.0%                         | 39.7                                     | 0.0%               | 0.0%                       | 0.0%                               |
| Laparoscopic salpingostomy                                                                                                  | 3                           | 100.0%                        | 105.8                                    | 33.3%              | 0.0%                       | 0.0%                               |
| Twist drill hole for subdural, intracerebral, or ventricular puncture                                                       | 16                          | 18.8%                         | 19.7                                     | 0.0%               | 0.0%                       | 0.0%                               |
| Creation of pericardial window                                                                                              | 7                           | 28.6%                         | 45.0                                     | 0.0%               | 0.0%                       | 0.0%                               |
| Maxillectomy                                                                                                                | 5                           | 60.0%                         | 63.0                                     | 0.0%               | 0.0%                       | 0.0%                               |
| Proctopexy - laparoscopic                                                                                                   | 5                           | 60.0%                         | 63.0                                     | 20.0%              | 0.0%                       | 0.0%                               |
| Repair of cor triatriatum or supra-atrial mitral ring by resection of left atrial membrane                                  | 3                           | 66.7%                         | 105.0                                    | 0.0%               | 0.0%                       | 0.0%                               |
| Stereotactic implantation of depth electrodes into the cerebrum for long-term seizure monitoring                            | 21                          | 23.8%                         | 14.9                                     | 0.0%               | 0.0%                       | 0.0%                               |
| Excision or transposition of pterygium                                                                                      | 12                          | 33.3%                         | 25.8                                     | 0.0%               | 0.0%                       | 0.0%                               |
| Sialolithotomy                                                                                                              | 13                          | 46.2%                         | 23.6                                     | 0.0%               | 0.0%                       | 0.0%                               |
| Excision of tendon, hand                                                                                                    | 8                           | 62.5%                         | 36.3                                     | 0.0%               | 0.0%                       | 0.0%                               |
| Aortic reconstruction/repair                                                                                                | 11                          | 27.3%                         | 25.2                                     | 0.0%               | 0.0%                       | 0.0%                               |
| Laparoscopic spleen procedure                                                                                               | 6                           | 33.3%                         | 46.3                                     | 0.0%               | 0.0%                       | 0.0%                               |
| Arterial bypass                                                                                                             | 12                          | 33.3%                         | 22.9                                     | 0.0%               | 0.0%                       | 0.0%                               |
| Division of plantar fascia and muscle                                                                                       | 3                           | 66.7%                         | 91.7                                     | 0.0%               | 0.0%                       | 0.0%                               |
| Repair of choanal atresia                                                                                                   | 3                           | 66.7%                         | 91.7                                     | 0.0%               | 0.0%                       | 0.0%                               |
| Insertion or replacement of peripheral or gastric neurostimulator pulse generator or receiver, direct or inductive coupling | 10                          | 50.0%                         | 27.3                                     | 0.0%               | 0.0%                       | 0.0%                               |
| Excision of lesion of spermatic cord                                                                                        | 10                          | 40.0%                         | 26.6                                     | 0.0%               | 0.0%                       | 0.0%                               |
| Neurostimulator procedures                                                                                                  | 11                          | 27.3%                         | 24.0                                     | 0.0%               | 0.0%                       | 0.0%                               |
| Fetal procedure                                                                                                             | 8                           | 37.5%                         | 32.8                                     | 0.0%               | 0.0%                       | 0.0%                               |
| Plastic operation of penis for injury                                                                                       | 5                           | 60.0%                         | 52.5                                     | 20.0%              | 0.0%                       | 0.0%                               |
| Excision of lesion of tongue                                                                                                | 3                           | 100.0%                        | 86.7                                     | 33.3%              | 0.0%                       | 0.0%                               |
| Application of halo, including removal                                                                                      | 7                           | 28.6%                         | 36.4                                     | 0.0%               | 0.0%                       | 0.0%                               |
| Vaginectomy                                                                                                                 | 6                           | 50.0%                         | 42.5                                     | 0.0%               | 0.0%                       | 0.0%                               |
| Intestinal procedure, resection and enterostomy                                                                             | 2                           | 100.0%                        | 127.5                                    | 0.0%               | 0.0%                       | 0.0%                               |
| Control of nasopharyngeal or oropharyngeal hemorrhage                                                                       | 4                           | 50.0%                         | 61.9                                     | 25.0%              | 0.0%                       | 0.0%                               |
| Intestinal procedure, colon repair without or without ostomy for ulcer, diverticulum, wound, or injury                      | 4                           | 50.0%                         | 60.0                                     | 0.0%               | 0.0%                       | 0.0%                               |
| Excision of pelvic pressure ulcer                                                                                           | 6                           | 33.3%                         | 39.2                                     | 16.7%              | 0.0%                       | 0.0%                               |
| Pyeloplasty                                                                                                                 | 6                           | 33.3%                         | 37.5                                     | 0.0%               | 0.0%                       | 0.0%                               |
| Capsulectomy or capsulotomy, hip                                                                                            | 5                           | 20.0%                         | 45.0                                     | 0.0%               | 0.0%                       | 0.0%                               |
| Reconstruction of congenital hand polydactyly                                                                               | 5                           | 40.0%                         | 45.0                                     | 20.0%              | 0.0%                       | 0.0%                               |
| Hypophysectomy or excision of pituitary tumor                                                                               | 2                           | 100.0%                        | 112.5                                    | 0.0%               | 0.0%                       | 0.0%                               |

**SUPPLEMENTAL TABLE 8** Continued

| <b>Procedure</b>                                                                                                   | <b>Number of procedures</b> | <b>Opioid dispensing rate</b> | <b>Mean MMEs per dispensed opioid Rx</b> | <b>Refill rate</b> | <b>Share of total MMEs</b> | <b>Share of surgical opioid Rx</b> |
|--------------------------------------------------------------------------------------------------------------------|-----------------------------|-------------------------------|------------------------------------------|--------------------|----------------------------|------------------------------------|
| Reconstruction of vena cava, any method                                                                            | 2                           | 50.0%                         | 112.5                                    | 0.0%               | 0.0%                       | 0.0%                               |
| Tracheoplasty                                                                                                      | 1                           | 100.0%                        | 225.0                                    | 0.0%               | 0.0%                       | 0.0%                               |
| Vitrectomy                                                                                                         | 79                          | 6.3%                          | 2.8                                      | 0.0%               | 0.0%                       | 0.0%                               |
| Excision and repair of eyelid                                                                                      | 36                          | 13.9%                         | 6.1                                      | 0.0%               | 0.0%                       | 0.0%                               |
| Liver resection                                                                                                    | 7                           | 42.9%                         | 31.1                                     | 0.0%               | 0.0%                       | 0.0%                               |
| Omentectomy, epiploectomy, resection of omentum                                                                    | 5                           | 40.0%                         | 42.0                                     | 0.0%               | 0.0%                       | 0.0%                               |
| Excision of exostosis(es), external auditory canal                                                                 | 12                          | 33.3%                         | 17.1                                     | 0.0%               | 0.0%                       | 0.0%                               |
| Repair of entropion                                                                                                | 32                          | 15.6%                         | 6.4                                      | 0.0%               | 0.0%                       | 0.0%                               |
| Excision of synovial cyst of popliteal space                                                                       | 4                           | 25.0%                         | 50.0                                     | 0.0%               | 0.0%                       | 0.0%                               |
| Acromioplasty or acromionectomy                                                                                    | 2                           | 50.0%                         | 100.0                                    | 50.0%              | 0.0%                       | 0.0%                               |
| Tracheostomy                                                                                                       | 15                          | 6.7%                          | 13.0                                     | 0.0%               | 0.0%                       | 0.0%                               |
| Exploration for postoperative hemorrhage, thrombosis or infection                                                  | 9                           | 22.2%                         | 21.7                                     | 0.0%               | 0.0%                       | 0.0%                               |
| Osteotomy of spine                                                                                                 | 3                           | 33.3%                         | 65.0                                     | 0.0%               | 0.0%                       | 0.0%                               |
| Excision of carotid body tumor                                                                                     | 2                           | 100.0%                        | 97.5                                     | 0.0%               | 0.0%                       | 0.0%                               |
| Canthoplasty                                                                                                       | 8                           | 37.5%                         | 23.8                                     | 0.0%               | 0.0%                       | 0.0%                               |
| Direct repair of aneurysm, pseudoaneurysm, or excision, lower extremity                                            | 2                           | 50.0%                         | 93.8                                     | 0.0%               | 0.0%                       | 0.0%                               |
| Creation of shunt, lumbar, subarachnoid-peritoneal, -pleural, or other; with or without laminectomy                | 6                           | 50.0%                         | 30.8                                     | 0.0%               | 0.0%                       | 0.0%                               |
| Ligation or banding of angioaccess arteriovenous fistula                                                           | 5                           | 40.0%                         | 36.0                                     | 0.0%               | 0.0%                       | 0.0%                               |
| Suture of mesentery                                                                                                | 2                           | 100.0%                        | 90.0                                     | 0.0%               | 0.0%                       | 0.0%                               |
| Thoracoscopy, with pleurectomy                                                                                     | 16                          | 18.8%                         | 11.1                                     | 0.0%               | 0.0%                       | 0.0%                               |
| Aqueous shunt to extraocular equatorial plate reservoir                                                            | 56                          | 10.7%                         | 3.1                                      | 0.0%               | 0.0%                       | 0.0%                               |
| Colostomy - laparoscopic                                                                                           | 15                          | 20.0%                         | 11.7                                     | 0.0%               | 0.0%                       | 0.0%                               |
| Hysterorrhaphy of ruptured uterus                                                                                  | 4                           | 75.0%                         | 43.1                                     | 0.0%               | 0.0%                       | 0.0%                               |
| Laparoscopic testicular procedure                                                                                  | 2                           | 100.0%                        | 82.5                                     | 0.0%               | 0.0%                       | 0.0%                               |
| Removal of implantable defibrillator pulse generator with replacement of implantable defibrillator pulse generator | 7                           | 14.3%                         | 21.4                                     | 0.0%               | 0.0%                       | 0.0%                               |
| Venous bypass, abdominal - open                                                                                    | 7                           | 14.3%                         | 21.4                                     | 0.0%               | 0.0%                       | 0.0%                               |
| Exploration, repair, and presacral drainage for rectal injury                                                      | 5                           | 20.0%                         | 30.0                                     | 0.0%               | 0.0%                       | 0.0%                               |
| Pterygomaxillary fossa surgery                                                                                     | 5                           | 20.0%                         | 30.0                                     | 0.0%               | 0.0%                       | 0.0%                               |
| Excision of cyst or adenoma of thyroid, or transection of isthmus                                                  | 4                           | 50.0%                         | 37.5                                     | 0.0%               | 0.0%                       | 0.0%                               |
| Lysis of adhesions (salpingolysis, ovariolysis)                                                                    | 3                           | 66.7%                         | 50.0                                     | 0.0%               | 0.0%                       | 0.0%                               |
| TIPS                                                                                                               | 3                           | 33.3%                         | 50.0                                     | 0.0%               | 0.0%                       | 0.0%                               |
| Excision tracheal stenosis and anastomosis                                                                         | 2                           | 50.0%                         | 75.0                                     | 0.0%               | 0.0%                       | 0.0%                               |
| Repair of paraesophageal hiatal hernia (including fundoplication)                                                  | 2                           | 50.0%                         | 75.0                                     | 0.0%               | 0.0%                       | 0.0%                               |
| Removal of prosthesis, shoulder                                                                                    | 1                           | 100.0%                        | 150.0                                    | 100.0%             | 0.0%                       | 0.0%                               |
| Laparoscopic bladder procedure                                                                                     | 5                           | 60.0%                         | 28.5                                     | 0.0%               | 0.0%                       | 0.0%                               |
| Sequestrectomy of shoulder                                                                                         | 1                           | 100.0%                        | 140.0                                    | 0.0%               | 0.0%                       | 0.0%                               |
| Ciliary body destruction                                                                                           | 37                          | 13.5%                         | 3.7                                      | 0.0%               | 0.0%                       | 0.0%                               |
| Closure of intestinal fistula                                                                                      | 11                          | 18.2%                         | 12.5                                     | 0.0%               | 0.0%                       | 0.0%                               |
| Bypass graft                                                                                                       | 4                           | 50.0%                         | 34.4                                     | 25.0%              | 0.0%                       | 0.0%                               |
| Removal of tissue expander(s) without insertion of prosthesis                                                      | 5                           | 20.0%                         | 27.0                                     | 0.0%               | 0.0%                       | 0.0%                               |
| Closure of gastrocolic fistula                                                                                     | 2                           | 50.0%                         | 67.5                                     | 0.0%               | 0.0%                       | 0.0%                               |
| Splenorrhaphy                                                                                                      | 2                           | 50.0%                         | 67.5                                     | 0.0%               | 0.0%                       | 0.0%                               |
| Transtemporal, transcochlear, transcondylar, transpetrosal approach to posterior cranial fossa                     | 2                           | 50.0%                         | 67.5                                     | 0.0%               | 0.0%                       | 0.0%                               |
| Plastic repair of canaliculi                                                                                       | 17                          | 11.8%                         | 7.5                                      | 0.0%               | 0.0%                       | 0.0%                               |
| Incision and drainage, pelvis or hip joint area                                                                    | 9                           | 33.3%                         | 14.2                                     | 0.0%               | 0.0%                       | 0.0%                               |

**SUPPLEMENTAL TABLE 8** Continued

| <b>Procedure</b>                                                                                                                             | <b>Number of procedures</b> | <b>Opioid dispensing rate</b> | <b>Mean MMEs per dispensed opioid Rx</b> | <b>Refill rate</b> | <b>Share of total MMEs</b> | <b>Share of surgical opioid Rx</b> |
|----------------------------------------------------------------------------------------------------------------------------------------------|-----------------------------|-------------------------------|------------------------------------------|--------------------|----------------------------|------------------------------------|
| Repair of eye laceration                                                                                                                     | 26                          | 7.7%                          | 4.6                                      | 0.0%               | 0.0%                       | 0.0%                               |
| Excision of rectal procidentia                                                                                                               | 3                           | 33.3%                         | 40.0                                     | 0.0%               | 0.0%                       | 0.0%                               |
| Nephrostomy and/or nephrotomy                                                                                                                | 1                           | 100.0%                        | 120.0                                    | 0.0%               | 0.0%                       | 0.0%                               |
| Follicle puncture for oocyte retrieval                                                                                                       | 16                          | 18.8%                         | 7.3                                      | 6.3%               | 0.0%                       | 0.0%                               |
| Repair of isolated partial anomalous pulmonary venous return (eg, Scimitar Syndrome)                                                         | 3                           | 33.3%                         | 37.5                                     | 0.0%               | 0.0%                       | 0.0%                               |
| Suture of esophageal wound or injury                                                                                                         | 3                           | 33.3%                         | 37.5                                     | 0.0%               | 0.0%                       | 0.0%                               |
| Liver debridement                                                                                                                            | 2                           | 50.0%                         | 56.3                                     | 0.0%               | 0.0%                       | 0.0%                               |
| Uterine suspension                                                                                                                           | 1                           | 100.0%                        | 112.5                                    | 0.0%               | 0.0%                       | 0.0%                               |
| Interventional cardiology; Comprehensive electrophysiologic evaluation including insertion and repositioning of multiple electrode catheters | 701                         | 0.6%                          | 0.2                                      | 0.0%               | 0.0%                       | 0.0%                               |
| Gastrojejunostomy                                                                                                                            | 3                           | 66.7%                         | 35.0                                     | 33.3%              | 0.0%                       | 0.0%                               |
| Direct or patch closure, sinus venosus, with or without anomalous pulmonary venous drainage                                                  | 4                           | 25.0%                         | 25.0                                     | 0.0%               | 0.0%                       | 0.0%                               |
| Insertion of orbital implant                                                                                                                 | 4                           | 25.0%                         | 25.0                                     | 25.0%              | 0.0%                       | 0.0%                               |
| Transfer of adductor to ischium                                                                                                              | 3                           | 33.3%                         | 33.3                                     | 0.0%               | 0.0%                       | 0.0%                               |
| Nipple exploration or reconstruction                                                                                                         | 6                           | 33.3%                         | 15.1                                     | 0.0%               | 0.0%                       | 0.0%                               |
| Gender affirming procedure, vaginoplasty                                                                                                     | 6                           | 16.7%                         | 15.0                                     | 0.0%               | 0.0%                       | 0.0%                               |
| Placement of enterostomy or cecostomy, tube open                                                                                             | 5                           | 20.0%                         | 18.0                                     | 0.0%               | 0.0%                       | 0.0%                               |
| Enterotomy                                                                                                                                   | 4                           | 25.0%                         | 22.5                                     | 0.0%               | 0.0%                       | 0.0%                               |
| Facial nerve reconstruction or repair                                                                                                        | 2                           | 50.0%                         | 45.0                                     | 0.0%               | 0.0%                       | 0.0%                               |
| Centralization of wrist on ulna                                                                                                              | 1                           | 100.0%                        | 90.0                                     | 0.0%               | 0.0%                       | 0.0%                               |
| Penile prostheses                                                                                                                            | 1                           | 100.0%                        | 90.0                                     | 0.0%               | 0.0%                       | 0.0%                               |
| Incision for implantation of neurostimulator electrode array                                                                                 | 5                           | 40.0%                         | 16.5                                     | 20.0%              | 0.0%                       | 0.0%                               |
| Corpora cavernosa shunts fore priapism                                                                                                       | 4                           | 50.0%                         | 20.6                                     | 0.0%               | 0.0%                       | 0.0%                               |
| Intestinal procedure, excision of lesion without anastomosis, exteriorization or fistulization                                               | 1                           | 100.0%                        | 81.0                                     | 0.0%               | 0.0%                       | 0.0%                               |
| Resection of recurrent ovarian, tubal, primary peritoneal, uterine malignancy                                                                | 1                           | 100.0%                        | 80.0                                     | 0.0%               | 0.0%                       | 0.0%                               |
| Laparoscopic enterotomy closure                                                                                                              | 5                           | 40.0%                         | 15.5                                     | 0.0%               | 0.0%                       | 0.0%                               |
| Incision of bone cortex, shoulder and upper extremity                                                                                        | 13                          | 15.4%                         | 5.9                                      | 0.0%               | 0.0%                       | 0.0%                               |
| Percutaneous coronary procedures                                                                                                             | 139                         | 0.7%                          | 0.5                                      | 0.0%               | 0.0%                       | 0.0%                               |
| Mohs micrographic technique                                                                                                                  | 32                          | 6.3%                          | 2.3                                      | 0.0%               | 0.0%                       | 0.0%                               |
| Construction of intermarginal adhesions, median tarsorrhaphy, or canthorrhaphy                                                               | 7                           | 14.3%                         | 10.7                                     | 0.0%               | 0.0%                       | 0.0%                               |
| Ocular surface reconstruction                                                                                                                | 7                           | 14.3%                         | 10.7                                     | 0.0%               | 0.0%                       | 0.0%                               |
| Closure of ureterocutaneous fistula                                                                                                          | 5                           | 40.0%                         | 15.0                                     | 0.0%               | 0.0%                       | 0.0%                               |
| Osteoplasty of facial bones                                                                                                                  | 4                           | 25.0%                         | 18.8                                     | 0.0%               | 0.0%                       | 0.0%                               |
| Epiphyseal arrest by epiphysodesis or stapling, greater trochanter of femur                                                                  | 2                           | 50.0%                         | 37.5                                     | 0.0%               | 0.0%                       | 0.0%                               |
| Evisceration of ocular contents                                                                                                              | 2                           | 100.0%                        | 37.5                                     | 50.0%              | 0.0%                       | 0.0%                               |
| Proctopexy - open                                                                                                                            | 2                           | 50.0%                         | 37.5                                     | 0.0%               | 0.0%                       | 0.0%                               |
| CABG                                                                                                                                         | 1                           | 100.0%                        | 75.0                                     | 0.0%               | 0.0%                       | 0.0%                               |
| Pollicization of a digit                                                                                                                     | 1                           | 100.0%                        | 75.0                                     | 0.0%               | 0.0%                       | 0.0%                               |
| Shunt; superior vena cava to pulmonary artery for flow to both lungs (bidirectional Glenn procedure)                                         | 1                           | 100.0%                        | 75.0                                     | 0.0%               | 0.0%                       | 0.0%                               |
| Syndactylization, toes                                                                                                                       | 1                           | 100.0%                        | 75.0                                     | 0.0%               | 0.0%                       | 0.0%                               |
| Incision and drainage of abscess in posterior spine                                                                                          | 6                           | 16.7%                         | 11.3                                     | 0.0%               | 0.0%                       | 0.0%                               |
| Revision of cranial neurostimulator pulse generator or receiver                                                                              | 6                           | 33.3%                         | 11.3                                     | 0.0%               | 0.0%                       | 0.0%                               |
| Excision of Meckel diverticulum or omphalomesenteric duct                                                                                    | 6                           | 16.7%                         | 10.0                                     | 0.0%               | 0.0%                       | 0.0%                               |

**SUPPLEMENTAL TABLE 8** Continued

| <b>Procedure</b>                                                                              | <b>Number of procedures</b> | <b>Opioid dispensing rate</b> | <b>Mean MMEs per dispensed opioid Rx</b> | <b>Refill rate</b> | <b>Share of total MMEs</b> | <b>Share of surgical opioid Rx</b> |
|-----------------------------------------------------------------------------------------------|-----------------------------|-------------------------------|------------------------------------------|--------------------|----------------------------|------------------------------------|
| Drainage of perirenal or renal abscess - open                                                 | 2                           | 50.0%                         | 30.0                                     | 0.0%               | 0.0%                       | 0.0%                               |
| Laparoscopic renal procedure                                                                  | 2                           | 100.0%                        | 30.0                                     | 0.0%               | 0.0%                       | 0.0%                               |
| Gastrostomy                                                                                   | 15                          | 6.7%                          | 3.3                                      | 0.0%               | 0.0%                       | 0.0%                               |
| Excision of olecranon bursa                                                                   | 3                           | 33.3%                         | 16.7                                     | 0.0%               | 0.0%                       | 0.0%                               |
| Repair of ectropion                                                                           | 2                           | 50.0%                         | 25.0                                     | 0.0%               | 0.0%                       | 0.0%                               |
| Radial styloidectomy                                                                          | 1                           | 100.0%                        | 50.0                                     | 0.0%               | 0.0%                       | 0.0%                               |
| Repair of meningocele or myelomeningocele                                                     | 1                           | 100.0%                        | 50.0                                     | 0.0%               | 0.0%                       | 0.0%                               |
| Fistulization of sclera for glaucoma                                                          | 9                           | 22.2%                         | 5.0                                      | 0.0%               | 0.0%                       | 0.0%                               |
| Implantation of intrastromal corneal ring segments                                            | 6                           | 16.7%                         | 7.5                                      | 0.0%               | 0.0%                       | 0.0%                               |
| Alveolectomy                                                                                  | 5                           | 20.0%                         | 9.0                                      | 0.0%               | 0.0%                       | 0.0%                               |
| Ureterectomy                                                                                  | 1                           | 100.0%                        | 45.0                                     | 0.0%               | 0.0%                       | 0.0%                               |
| Ablation of intra-abdominal tumor or benign lesion - laparoscopic                             | 3                           | 33.3%                         | 13.3                                     | 0.0%               | 0.0%                       | 0.0%                               |
| Laparoscopic ureteral procedure                                                               | 2                           | 50.0%                         | 20.0                                     | 0.0%               | 0.0%                       | 0.0%                               |
| Epiglottidectomy                                                                              | 1                           | 100.0%                        | 40.0                                     | 0.0%               | 0.0%                       | 0.0%                               |
| Trachelorrhaphy, plastic repair of uterine cervix, vaginal approach                           | 8                           | 12.5%                         | 4.7                                      | 0.0%               | 0.0%                       | 0.0%                               |
| Thoracotomy, with removal of intrapleural foreign body or fibrin deposit                      | 3                           | 33.3%                         | 12.5                                     | 0.0%               | 0.0%                       | 0.0%                               |
| Adrenalectomy - open                                                                          | 2                           | 50.0%                         | 18.8                                     | 0.0%               | 0.0%                       | 0.0%                               |
| Outflow tract augmentation (gusset), with or without commissurotomy or infundibular resection | 1                           | 100.0%                        | 37.5                                     | 0.0%               | 0.0%                       | 0.0%                               |
| Transcatheter pulmonary valve implantation                                                    | 45                          | 2.2%                          | 0.7                                      | 0.0%               | 0.0%                       | 0.0%                               |
| Cricopharyngeal myotomy                                                                       | 3                           | 33.3%                         | 8.3                                      | 0.0%               | 0.0%                       | 0.0%                               |
| Intestinal procedure, lysis of adhesions                                                      | 14                          | 7.1%                          | 1.6                                      | 0.0%               | 0.0%                       | 0.0%                               |
| Endoscopic plantar fasciotomy                                                                 | 5                           | 20.0%                         | 4.5                                      | 0.0%               | 0.0%                       | 0.0%                               |
| Resection of scrotum                                                                          | 3                           | 33.3%                         | 7.5                                      | 0.0%               | 0.0%                       | 0.0%                               |
| Intravitreal injection of a pharmacologic agent                                               | 276                         | 0.4%                          | 0.0                                      | 0.0%               | 0.0%                       | 0.0%                               |
| Removal of implanted material, eye                                                            | 17                          | 5.9%                          | 0.1                                      | 0.0%               | 0.0%                       | 0.0%                               |
| Insertion of intraocular lens prosthesis, not associated with concurrent cataract removal     | 7                           | 14.3%                         | 0.2                                      | 0.0%               | 0.0%                       | 0.0%                               |
| Destruction of localized lesion of retina                                                     | 33                          | 3.0%                          | 0.0                                      | 0.0%               | 0.0%                       | 0.0%                               |
| Removal of lens material                                                                      | 12                          | 8.3%                          | 0.1                                      | 0.0%               | 0.0%                       | 0.0%                               |
| Placement of needle for intraosseous infusion                                                 | 18                          | 0.0%                          | 0.0                                      | 0.0%               | 0.0%                       | 0.0%                               |
| Percardial drainage                                                                           | 15                          | 0.0%                          | 0.0                                      | 0.0%               | 0.0%                       | 0.0%                               |
| Elevation of depressed skull fracture                                                         | 14                          | 0.0%                          | 0.0                                      | 0.0%               | 0.0%                       | 0.0%                               |
| Removal of implant from finger or hand                                                        | 12                          | 0.0%                          | 0.0                                      | 0.0%               | 0.0%                       | 0.0%                               |
| Tracheostoma revision                                                                         | 10                          | 0.0%                          | 0.0                                      | 0.0%               | 0.0%                       | 0.0%                               |
| Intestinal procedure, intestinal hernia and volvulus derotation open laparotomy               | 9                           | 0.0%                          | 0.0                                      | 0.0%               | 0.0%                       | 0.0%                               |
| Thoracotomy, with cardiac massage                                                             | 9                           | 0.0%                          | 0.0                                      | 0.0%               | 0.0%                       | 0.0%                               |
| Removal of vitreous, anterior approach                                                        | 8                           | 0.0%                          | 0.0                                      | 0.0%               | 0.0%                       | 0.0%                               |
| Goniotomy                                                                                     | 7                           | 0.0%                          | 0.0                                      | 0.0%               | 0.0%                       | 0.0%                               |
| Surgical treatment of abortion                                                                | 7                           | 0.0%                          | 0.0                                      | 0.0%               | 0.0%                       | 0.0%                               |
| Trabeculectomy ab externo                                                                     | 7                           | 0.0%                          | 0.0                                      | 0.0%               | 0.0%                       | 0.0%                               |
| Removal or repair of electromagnetic bone conduction hearing device in temporal bone          | 6                           | 0.0%                          | 0.0                                      | 0.0%               | 0.0%                       | 0.0%                               |
| Revision or repair of operative wound of anterior segment of eye                              | 6                           | 0.0%                          | 0.0                                      | 0.0%               | 0.0%                       | 0.0%                               |
| Intracranial aneurysm repair - open                                                           | 5                           | 0.0%                          | 0.0                                      | 0.0%               | 0.0%                       | 0.0%                               |
| Nasal/sinus endoscopy                                                                         | 5                           | 0.0%                          | 0.0                                      | 0.0%               | 0.0%                       | 0.0%                               |
| Canthopexy                                                                                    | 4                           | 0.0%                          | 0.0                                      | 0.0%               | 0.0%                       | 0.0%                               |
| Reconstruction of eyelid                                                                      | 4                           | 0.0%                          | 0.0                                      | 0.0%               | 0.0%                       | 0.0%                               |

**SUPPLEMENTAL TABLE 8** Continued

| <b>Procedure</b>                                                                                                                                                                                               | <b>Number of procedures</b> | <b>Opioid dispensing rate</b> | <b>Mean MMEs per dispensed opioid Rx</b> | <b>Refill rate</b> | <b>Share of total MMEs</b> | <b>Share of surgical opioid Rx</b> |
|----------------------------------------------------------------------------------------------------------------------------------------------------------------------------------------------------------------|-----------------------------|-------------------------------|------------------------------------------|--------------------|----------------------------|------------------------------------|
| Removal of foreign body, intraocular                                                                                                                                                                           | 4                           | 0.0%                          | 0.0                                      | 0.0%               | 0.0%                       | 0.0%                               |
| Thoracotomy, with pulmonary decortication                                                                                                                                                                      | 4                           | 0.0%                          | 0.0                                      | 0.0%               | 0.0%                       | 0.0%                               |
| Thrombectomy or thrombolysis, percutaneous intracranial                                                                                                                                                        | 4                           | 0.0%                          | 0.0                                      | 0.0%               | 0.0%                       | 0.0%                               |
| Arthroplasty of shoulder                                                                                                                                                                                       | 3                           | 0.0%                          | 0.0                                      | 0.0%               | 0.0%                       | 0.0%                               |
| Cutaneous vesicostomy                                                                                                                                                                                          | 3                           | 0.0%                          | 0.0                                      | 0.0%               | 0.0%                       | 0.0%                               |
| Esophagoplasty                                                                                                                                                                                                 | 3                           | 0.0%                          | 0.0                                      | 0.0%               | 0.0%                       | 0.0%                               |
| Excision of dermoid cyst, nose                                                                                                                                                                                 | 3                           | 0.0%                          | 0.0                                      | 0.0%               | 0.0%                       | 0.0%                               |
| Gingivoplasty                                                                                                                                                                                                  | 3                           | 0.0%                          | 0.0                                      | 0.0%               | 0.0%                       | 0.0%                               |
| Heart transplant                                                                                                                                                                                               | 3                           | 0.0%                          | 0.0                                      | 0.0%               | 0.0%                       | 0.0%                               |
| Incision and drainage of abscess; retropharyngeal or parapharyngeal                                                                                                                                            | 3                           | 0.0%                          | 0.0                                      | 0.0%               | 0.0%                       | 0.0%                               |
| Laryngeal reinnervation by neuromuscular pedicle                                                                                                                                                               | 3                           | 0.0%                          | 0.0                                      | 0.0%               | 0.0%                       | 0.0%                               |
| Release of extensive scar tissue without detaching extraocular muscle (separate procedure)                                                                                                                     | 3                           | 0.0%                          | 0.0                                      | 0.0%               | 0.0%                       | 0.0%                               |
| Resection (initial) of ovarian, tubal or primary peritoneal malignancy with bilateral salpingo-oophorectomy and omentectomy; with total abdominal hysterectomy, pelvic and limited para-aortic lymphadenectomy | 3                           | 0.0%                          | 0.0                                      | 0.0%               | 0.0%                       | 0.0%                               |
| Closure of cystostomy                                                                                                                                                                                          | 2                           | 0.0%                          | 0.0                                      | 0.0%               | 0.0%                       | 0.0%                               |
| Construction of artificial vagina                                                                                                                                                                              | 2                           | 0.0%                          | 0.0                                      | 0.0%               | 0.0%                       | 0.0%                               |
| Correction of lagophthalmos                                                                                                                                                                                    | 2                           | 0.0%                          | 0.0                                      | 0.0%               | 0.0%                       | 0.0%                               |
| Correction of lid retraction                                                                                                                                                                                   | 2                           | 0.0%                          | 0.0                                      | 0.0%               | 0.0%                       | 0.0%                               |
| Craniofacial, orbitocranial, bicoronal approach to anterior cranial fossa                                                                                                                                      | 2                           | 0.0%                          | 0.0                                      | 0.0%               | 0.0%                       | 0.0%                               |
| Debridement of shoulder                                                                                                                                                                                        | 2                           | 0.0%                          | 0.0                                      | 0.0%               | 0.0%                       | 0.0%                               |
| Drainage of ovarian abscess                                                                                                                                                                                    | 2                           | 0.0%                          | 0.0                                      | 0.0%               | 0.0%                       | 0.0%                               |
| Drainage of retroperitoneal abscess - open                                                                                                                                                                     | 2                           | 0.0%                          | 0.0                                      | 0.0%               | 0.0%                       | 0.0%                               |
| Excision of cystic hygroma                                                                                                                                                                                     | 2                           | 0.0%                          | 0.0                                      | 0.0%               | 0.0%                       | 0.0%                               |
| Gender affirming procedure, clitoroplasty                                                                                                                                                                      | 2                           | 0.0%                          | 0.0                                      | 0.0%               | 0.0%                       | 0.0%                               |
| Myomectomy, fibroid                                                                                                                                                                                            | 2                           | 0.0%                          | 0.0                                      | 0.0%               | 0.0%                       | 0.0%                               |
| Paracentesis of anterior chamber of eye                                                                                                                                                                        | 2                           | 0.0%                          | 0.0                                      | 0.0%               | 0.0%                       | 0.0%                               |
| Proctoplasty                                                                                                                                                                                                   | 2                           | 0.0%                          | 0.0                                      | 0.0%               | 0.0%                       | 0.0%                               |
| Pyloromyotomy, cutting of pyloric muscle (Fredet-Ramstedt type operation)                                                                                                                                      | 2                           | 0.0%                          | 0.0                                      | 0.0%               | 0.0%                       | 0.0%                               |
| Radical excision of external auditory canal lesion                                                                                                                                                             | 2                           | 0.0%                          | 0.0                                      | 0.0%               | 0.0%                       | 0.0%                               |
| Removal of foreign body from deep penile tissue (eg, plastic implant)                                                                                                                                          | 2                           | 0.0%                          | 0.0                                      | 0.0%               | 0.0%                       | 0.0%                               |
| Repair of brow ptosis                                                                                                                                                                                          | 2                           | 0.0%                          | 0.0                                      | 0.0%               | 0.0%                       | 0.0%                               |
| Repair of pulmonary atresia with ventricular septal defect, by construction or replacement of conduit from right or left ventricle to pulmonary artery                                                         | 2                           | 0.0%                          | 0.0                                      | 0.0%               | 0.0%                       | 0.0%                               |
| Repair of round window fistula                                                                                                                                                                                 | 2                           | 0.0%                          | 0.0                                      | 0.0%               | 0.0%                       | 0.0%                               |
| Replantation, upper extremity                                                                                                                                                                                  | 2                           | 0.0%                          | 0.0                                      | 0.0%               | 0.0%                       | 0.0%                               |
| Repositioning of intraocular lens prosthesis, requiring an incision                                                                                                                                            | 2                           | 0.0%                          | 0.0                                      | 0.0%               | 0.0%                       | 0.0%                               |
| Revision of aqueous shunt to extraocular equatorial plate reservoir                                                                                                                                            | 2                           | 0.0%                          | 0.0                                      | 0.0%               | 0.0%                       | 0.0%                               |
| Revision of tracheostomy scar                                                                                                                                                                                  | 2                           | 0.0%                          | 0.0                                      | 0.0%               | 0.0%                       | 0.0%                               |
| Septal or other intranasal dermatoplasty                                                                                                                                                                       | 2                           | 0.0%                          | 0.0                                      | 0.0%               | 0.0%                       | 0.0%                               |
| Sling operation for stress incontinence                                                                                                                                                                        | 2                           | 0.0%                          | 0.0                                      | 0.0%               | 0.0%                       | 0.0%                               |
| Thoracoscopy, control of hemorrhage                                                                                                                                                                            | 2                           | 0.0%                          | 0.0                                      | 0.0%               | 0.0%                       | 0.0%                               |
| Ureterolysis                                                                                                                                                                                                   | 2                           | 0.0%                          | 0.0                                      | 0.0%               | 0.0%                       | 0.0%                               |

**SUPPLEMENTAL TABLE 8** Continued

| <b>Procedure</b>                                                                                                     | <b>Number of procedures</b> | <b>Opioid dispensing rate</b> | <b>Mean MMEs per dispensed opioid Rx</b> | <b>Refill rate</b> | <b>Share of total MMEs</b> | <b>Share of surgical opioid Rx</b> |
|----------------------------------------------------------------------------------------------------------------------|-----------------------------|-------------------------------|------------------------------------------|--------------------|----------------------------|------------------------------------|
| Vermilionectomy, with mucosal advancement                                                                            | 2                           | 0.0%                          | 0.0                                      | 0.0%               | 0.0%                       | 0.0%                               |
| Arthroplasty of ankle                                                                                                | 1                           | 0.0%                          | 0.0                                      | 0.0%               | 0.0%                       | 0.0%                               |
| Banding of pulmonary artery                                                                                          | 1                           | 0.0%                          | 0.0                                      | 0.0%               | 0.0%                       | 0.0%                               |
| Biliary reconstruction - open                                                                                        | 1                           | 0.0%                          | 0.0                                      | 0.0%               | 0.0%                       | 0.0%                               |
| Cardiac ablation                                                                                                     | 1                           | 0.0%                          | 0.0                                      | 0.0%               | 0.0%                       | 0.0%                               |
| Cardiac procedure, unlisted                                                                                          | 1                           | 0.0%                          | 0.0                                      | 0.0%               | 0.0%                       | 0.0%                               |
| Closure of rectovesical fistula                                                                                      | 1                           | 0.0%                          | 0.0                                      | 0.0%               | 0.0%                       | 0.0%                               |
| Closure of salivary fistula                                                                                          | 1                           | 0.0%                          | 0.0                                      | 0.0%               | 0.0%                       | 0.0%                               |
| Colotomy                                                                                                             | 1                           | 0.0%                          | 0.0                                      | 0.0%               | 0.0%                       | 0.0%                               |
| Colpopexy - open                                                                                                     | 1                           | 0.0%                          | 0.0                                      | 0.0%               | 0.0%                       | 0.0%                               |
| Condylectomy of temporomandibular joint                                                                              | 1                           | 0.0%                          | 0.0                                      | 0.0%               | 0.0%                       | 0.0%                               |
| Coracoacromial ligament release                                                                                      | 1                           | 0.0%                          | 0.0                                      | 0.0%               | 0.0%                       | 0.0%                               |
| Creation of lesion by stereotactic method                                                                            | 1                           | 0.0%                          | 0.0                                      | 0.0%               | 0.0%                       | 0.0%                               |
| Cricotracheal resection                                                                                              | 1                           | 0.0%                          | 0.0                                      | 0.0%               | 0.0%                       | 0.0%                               |
| Cystectomy                                                                                                           | 1                           | 0.0%                          | 0.0                                      | 0.0%               | 0.0%                       | 0.0%                               |
| Diverticulectomy of hypopharynx or esophagus                                                                         | 1                           | 0.0%                          | 0.0                                      | 0.0%               | 0.0%                       | 0.0%                               |
| Division of stricture of rectum                                                                                      | 1                           | 0.0%                          | 0.0                                      | 0.0%               | 0.0%                       | 0.0%                               |
| Drainage of salivary gland abscess                                                                                   | 1                           | 0.0%                          | 0.0                                      | 0.0%               | 0.0%                       | 0.0%                               |
| Drainage of subdiaphragmatic or subphrenic abscess - open                                                            | 1                           | 0.0%                          | 0.0                                      | 0.0%               | 0.0%                       | 0.0%                               |
| ECMO                                                                                                                 | 1                           | 0.0%                          | 0.0                                      | 0.0%               | 0.0%                       | 0.0%                               |
| Endovascular aortic valve replacement                                                                                | 1                           | 0.0%                          | 0.0                                      | 0.0%               | 0.0%                       | 0.0%                               |
| Epiphyseal or hemiepiphyseal arrest, upper extremity                                                                 | 1                           | 0.0%                          | 0.0                                      | 0.0%               | 0.0%                       | 0.0%                               |
| Esophagogastric fundoplasty                                                                                          | 1                           | 0.0%                          | 0.0                                      | 0.0%               | 0.0%                       | 0.0%                               |
| Esophagomyotomy                                                                                                      | 1                           | 0.0%                          | 0.0                                      | 0.0%               | 0.0%                       | 0.0%                               |
| Exchange of intraocular lens                                                                                         | 1                           | 0.0%                          | 0.0                                      | 0.0%               | 0.0%                       | 0.0%                               |
| Excision of Mullerian duct cyst                                                                                      | 1                           | 0.0%                          | 0.0                                      | 0.0%               | 0.0%                       | 0.0%                               |
| Excision of ampulla of Vater                                                                                         | 1                           | 0.0%                          | 0.0                                      | 0.0%               | 0.0%                       | 0.0%                               |
| Excision of choledochal cyst                                                                                         | 1                           | 0.0%                          | 0.0                                      | 0.0%               | 0.0%                       | 0.0%                               |
| Excision of coarctation of aorta                                                                                     | 1                           | 0.0%                          | 0.0                                      | 0.0%               | 0.0%                       | 0.0%                               |
| Excision of lesion of palate, uvula                                                                                  | 1                           | 0.0%                          | 0.0                                      | 0.0%               | 0.0%                       | 0.0%                               |
| Excision of lesion of tendon sheath, forearm and/or wrist                                                            | 1                           | 0.0%                          | 0.0                                      | 0.0%               | 0.0%                       | 0.0%                               |
| Excision of lesion, conjunctiva                                                                                      | 1                           | 0.0%                          | 0.0                                      | 0.0%               | 0.0%                       | 0.0%                               |
| Excision of stomach ulcer or tumor                                                                                   | 1                           | 0.0%                          | 0.0                                      | 0.0%               | 0.0%                       | 0.0%                               |
| Excision of tonsil tags                                                                                              | 1                           | 0.0%                          | 0.0                                      | 0.0%               | 0.0%                       | 0.0%                               |
| Excision or unroofing of cyst(s) of kidney                                                                           | 1                           | 0.0%                          | 0.0                                      | 0.0%               | 0.0%                       | 0.0%                               |
| Fascia lata graft                                                                                                    | 1                           | 0.0%                          | 0.0                                      | 0.0%               | 0.0%                       | 0.0%                               |
| Filletted finger or toe flap, including preparation of recipient site                                                | 1                           | 0.0%                          | 0.0                                      | 0.0%               | 0.0%                       | 0.0%                               |
| Hysteroplasty, repair of uterine anomaly (Strassman type)                                                            | 1                           | 0.0%                          | 0.0                                      | 0.0%               | 0.0%                       | 0.0%                               |
| Implantation of chemotherapy device                                                                                  | 1                           | 0.0%                          | 0.0                                      | 0.0%               | 0.0%                       | 0.0%                               |
| Incision and drainage of appendiceal abscess - open                                                                  | 1                           | 0.0%                          | 0.0                                      | 0.0%               | 0.0%                       | 0.0%                               |
| Insertion of subcutaneous reservoir, pump or continuous infusion system for connection to ventricular catheter (CNS) | 1                           | 0.0%                          | 0.0                                      | 0.0%               | 0.0%                       | 0.0%                               |
| Intestinal procedure, strictuloplasty                                                                                | 1                           | 0.0%                          | 0.0                                      | 0.0%               | 0.0%                       | 0.0%                               |
| Iridectomy, with corneoscleral or corneal section                                                                    | 1                           | 0.0%                          | 0.0                                      | 0.0%               | 0.0%                       | 0.0%                               |
| Keratomiileusis                                                                                                      | 1                           | 0.0%                          | 0.0                                      | 0.0%               | 0.0%                       | 0.0%                               |
| Laparoscopic esophagus procedure                                                                                     | 1                           | 0.0%                          | 0.0                                      | 0.0%               | 0.0%                       | 0.0%                               |
| Laparoscopic rectal procedure                                                                                        | 1                           | 0.0%                          | 0.0                                      | 0.0%               | 0.0%                       | 0.0%                               |
| Laparoscopic uterine procedure                                                                                       | 1                           | 0.0%                          | 0.0                                      | 0.0%               | 0.0%                       | 0.0%                               |
| Multiple punctures of anterior cornea (eg, for corneal erosion, tattoo)                                              | 1                           | 0.0%                          | 0.0                                      | 0.0%               | 0.0%                       | 0.0%                               |

**SUPPLEMENTAL TABLE 8** Continued

| <b>Procedure</b>                                                                                        | <b>Number of procedures</b> | <b>Opioid dispensing rate</b> | <b>Mean MMEs per dispensed opioid Rx</b> | <b>Refill rate</b> | <b>Share of total MMEs</b> | <b>Share of surgical opioid Rx</b> |
|---------------------------------------------------------------------------------------------------------|-----------------------------|-------------------------------|------------------------------------------|--------------------|----------------------------|------------------------------------|
| Muscle transfer, upper extremity                                                                        | 1                           | 0.0%                          | 0.0                                      | 0.0%               | 0.0%                       | 0.0%                               |
| Non-surgical repair of anal or anorectal fistula                                                        | 1                           | 0.0%                          | 0.0                                      | 0.0%               | 0.0%                       | 0.0%                               |
| Optic nerve decompression                                                                               | 1                           | 0.0%                          | 0.0                                      | 0.0%               | 0.0%                       | 0.0%                               |
| Penile reconstruction                                                                                   | 1                           | 0.0%                          | 0.0                                      | 0.0%               | 0.0%                       | 0.0%                               |
| Placement, removal, revision and/or replacement of adjustable gastric restrictive device - laparoscopic | 1                           | 0.0%                          | 0.0                                      | 0.0%               | 0.0%                       | 0.0%                               |
| Ptosis correction                                                                                       | 1                           | 0.0%                          | 0.0                                      | 0.0%               | 0.0%                       | 0.0%                               |
| Pulmonary endarterectomy                                                                                | 1                           | 0.0%                          | 0.0                                      | 0.0%               | 0.0%                       | 0.0%                               |
| Reconstruction of tendon pulley; finger                                                                 | 1                           | 0.0%                          | 0.0                                      | 0.0%               | 0.0%                       | 0.0%                               |
| Release or recession, hamstring, proximal                                                               | 1                           | 0.0%                          | 0.0                                      | 0.0%               | 0.0%                       | 0.0%                               |
| Removal of hip prosthesis                                                                               | 1                           | 0.0%                          | 0.0                                      | 0.0%               | 0.0%                       | 0.0%                               |
| Removal of mammary implant                                                                              | 1                           | 0.0%                          | 0.0                                      | 0.0%               | 0.0%                       | 0.0%                               |
| Removal of ventricular assist device                                                                    | 1                           | 0.0%                          | 0.0                                      | 0.0%               | 0.0%                       | 0.0%                               |
| Removal or revision of orbital implant                                                                  | 1                           | 0.0%                          | 0.0                                      | 0.0%               | 0.0%                       | 0.0%                               |
| Removal or revision of sling for stress incontinence                                                    | 1                           | 0.0%                          | 0.0                                      | 0.0%               | 0.0%                       | 0.0%                               |
| Repair of arteriovenous fistula, congenital                                                             | 1                           | 0.0%                          | 0.0                                      | 0.0%               | 0.0%                       | 0.0%                               |
| Repair of cardiac wound                                                                                 | 1                           | 0.0%                          | 0.0                                      | 0.0%               | 0.0%                       | 0.0%                               |
| Repair of double outlet right ventricle with intraventricular tunnel repair                             | 1                           | 0.0%                          | 0.0                                      | 0.0%               | 0.0%                       | 0.0%                               |
| Repair of iris, ciliary body                                                                            | 1                           | 0.0%                          | 0.0                                      | 0.0%               | 0.0%                       | 0.0%                               |
| Repair of nasolabial fistula                                                                            | 1                           | 0.0%                          | 0.0                                      | 0.0%               | 0.0%                       | 0.0%                               |
| Repair of transposition of the great arteries                                                           | 1                           | 0.0%                          | 0.0                                      | 0.0%               | 0.0%                       | 0.0%                               |
| Repair of wound, extraocular muscle, tendon and/or Tenon's capsule                                      | 1                           | 0.0%                          | 0.0                                      | 0.0%               | 0.0%                       | 0.0%                               |
| Replacement, irrigation or revision of lumbosubarachnoid shunt                                          | 1                           | 0.0%                          | 0.0                                      | 0.0%               | 0.0%                       | 0.0%                               |
| Revision (including removal) of prosthetic vaginal graft - open                                         | 1                           | 0.0%                          | 0.0                                      | 0.0%               | 0.0%                       | 0.0%                               |
| Revision of peritoneal-venous shunt                                                                     | 1                           | 0.0%                          | 0.0                                      | 0.0%               | 0.0%                       | 0.0%                               |
| Scleral reinforcement                                                                                   | 1                           | 0.0%                          | 0.0                                      | 0.0%               | 0.0%                       | 0.0%                               |
| Secondary revision of orbitocraniofacial reconstruction                                                 | 1                           | 0.0%                          | 0.0                                      | 0.0%               | 0.0%                       | 0.0%                               |
| Severing adhesions of anterior segment of eye                                                           | 1                           | 0.0%                          | 0.0                                      | 0.0%               | 0.0%                       | 0.0%                               |
| Shoulder contracture release                                                                            | 1                           | 0.0%                          | 0.0                                      | 0.0%               | 0.0%                       | 0.0%                               |
| Sternal ostectomy, debridgement, resection                                                              | 1                           | 0.0%                          | 0.0                                      | 0.0%               | 0.0%                       | 0.0%                               |
| Suture and/or ligation of thoracic duct                                                                 | 1                           | 0.0%                          | 0.0                                      | 0.0%               | 0.0%                       | 0.0%                               |
| Suture of iris, ciliary body                                                                            | 1                           | 0.0%                          | 0.0                                      | 0.0%               | 0.0%                       | 0.0%                               |
| Tendon graft harvest                                                                                    | 1                           | 0.0%                          | 0.0                                      | 0.0%               | 0.0%                       | 0.0%                               |
| Thoracoscopy, with esophagomyotomy                                                                      | 1                           | 0.0%                          | 0.0                                      | 0.0%               | 0.0%                       | 0.0%                               |
| Thoracotomy, with resection-plication of bullae, includes any pleural procedure when performed          | 1                           | 0.0%                          | 0.0                                      | 0.0%               | 0.0%                       | 0.0%                               |
| Transcatheter placement of intravascular stent - percutaneous                                           | 1                           | 0.0%                          | 0.0                                      | 0.0%               | 0.0%                       | 0.0%                               |
| Transfer of tendon or muscle, hamstrings to femur                                                       | 1                           | 0.0%                          | 0.0                                      | 0.0%               | 0.0%                       | 0.0%                               |
| Ureteroenterostomy                                                                                      | 1                           | 0.0%                          | 0.0                                      | 0.0%               | 0.0%                       | 0.0%                               |
| Ureterolithotomy - open                                                                                 | 1                           | 0.0%                          | 0.0                                      | 0.0%               | 0.0%                       | 0.0%                               |
| Urethrorrhaphy                                                                                          | 1                           | 0.0%                          | 0.0                                      | 0.0%               | 0.0%                       | 0.0%                               |
| Venous valve transposition, any vein donor                                                              | 1                           | 0.0%                          | 0.0                                      | 0.0%               | 0.0%                       | 0.0%                               |

**SUPPLEMENTAL TABLE 9** Top 10 Procedures by Share of Total MMEs Among Adolescents Aged 12–21 Years, by Payer Type

| <b>Privately insured adolescents aged 12-21 y</b>                                      |                             |                               |                                                    |                                                              |
|----------------------------------------------------------------------------------------|-----------------------------|-------------------------------|----------------------------------------------------|--------------------------------------------------------------|
| <b>Procedure</b>                                                                       | <b>Number of procedures</b> | <b>Opioid dispensing rate</b> | <b>Mean MMEs per dispensed opioid prescription</b> | <b>Share of dispensed opioid prescriptions in the sample</b> |
| Arthroscopy of knee                                                                    | 7943                        | 47.2%                         | 93.9                                               | 13.1%                                                        |
| Tonsillectomy and/or adenoidectomy                                                     | 5134                        | 52.8%                         | 126.9                                              | 9.5%                                                         |
| Arthroscopy of shoulder                                                                | 2452                        | 47.6%                         | 114.3                                              | 4.1%                                                         |
| Rhinoplasty                                                                            | 2908                        | 50.1%                         | 93.1                                               | 5.1%                                                         |
| Open treatment of fracture, upper extremity                                            | 2871                        | 52.6%                         | 80.8                                               | 5.3%                                                         |
| Open treatment of fracture, lower extremity                                            | 2299                        | 49.0%                         | 98.4                                               | 3.9%                                                         |
| Appendectomy – laparoscopic                                                            | 3682                        | 40.7%                         | 46.5                                               | 5.2%                                                         |
| Cholecystectomy – laparoscopic                                                         | 1651                        | 60.4%                         | 89.0                                               | 3.5%                                                         |
| Ligamentous reconstruction (augmentation), knee                                        | 1168                        | 52.1%                         | 122.3                                              | 2.1%                                                         |
| Cesarean section                                                                       | 1127                        | 50.9%                         | 79.4                                               | 2.0%                                                         |
| <b>Publicly insured adolescents aged 12-21 y</b>                                       |                             |                               |                                                    |                                                              |
| <b>Procedure</b>                                                                       | <b>Number of procedures</b> | <b>Opioid dispensing rate</b> | <b>Mean MMEs per dispensed opioid prescription</b> | <b>Share of dispensed opioid prescriptions in the sample</b> |
| Tonsillectomy and/or adenoidectomy                                                     | 4226                        | 64.1%                         | 197.4                                              | 10.1%                                                        |
| Cesarean section                                                                       | 6393                        | 60.2%                         | 128.4                                              | 14.3%                                                        |
| Arthroscopy of knee                                                                    | 3281                        | 69.3%                         | 221.0                                              | 8.4%                                                         |
| Open treatment of fracture, lower extremity                                            | 1614                        | 64.9%                         | 208.6                                              | 3.9%                                                         |
| Open treatment of fracture, upper extremity                                            | 1777                        | 65.9%                         | 183.6                                              | 4.4%                                                         |
| Cholecystectomy – laparoscopic                                                         | 2202                        | 64.7%                         | 133.1                                              | 5.3%                                                         |
| Appendectomy – laparoscopic                                                            | 2859                        | 44.1%                         | 89.7                                               | 4.7%                                                         |
| Rhinoplasty                                                                            | 1108                        | 65.3%                         | 178.7                                              | 2.7%                                                         |
| Arthroscopy of shoulder                                                                | 800                         | 64.3%                         | 224.8                                              | 1.9%                                                         |
| Removal of implant; deep (eg, buried wire, pin, screw, metal band, nail, rod or plate) | 1360                        | 55.4%                         | 122.9                                              | 2.8%                                                         |

| <b>SUPPLEMENTAL TABLE 10</b> Results From Main Analysis Versus Sensitivity Analysis |                                                                                                                |                            |
|-------------------------------------------------------------------------------------|----------------------------------------------------------------------------------------------------------------|----------------------------|
| <b>Age group</b>                                                                    | <b>Main analysis, procedures with discharge date between December 1, 2020 through November 30, 2021</b>        | <b>Share of total MMEs</b> |
| 0-11 years                                                                          | Tonsillectomy and/or adenoidectomy                                                                             | 50.3%                      |
|                                                                                     | Open treatment of fracture, upper extremity                                                                    | 5.3%                       |
|                                                                                     | Removal of implant; deep (eg, buried wire, pin, screw, metal band, nail, rod or plate)                         | 3.5%                       |
|                                                                                     | <b>Sensitivity analysis, procedures with discharge date between December 1, 2018 through November 30, 2019</b> |                            |
|                                                                                     | Tonsillectomy and/or adenoidectomy                                                                             | 63.7%                      |
|                                                                                     | Open treatment of fracture, upper extremity                                                                    | 2.6%                       |
|                                                                                     | Removal of implant; deep (eg, buried wire, pin, screw, metal band, nail, rod or plate)                         | 2.2%                       |
| 12-21 years                                                                         | <b>Main analysis, procedures with discharge date between December 1, 2020 through November 30, 2021</b>        |                            |
|                                                                                     | Tonsillectomy and/or adenoidectomy                                                                             | 12.7%                      |
|                                                                                     | Arthroscopy of knee                                                                                            | 12.6%                      |
|                                                                                     | Cesarean section                                                                                               | 7.8%                       |
|                                                                                     | <b>Sensitivity analysis, procedures with discharge date between December 1, 2018 through November 30, 2019</b> |                            |
|                                                                                     | Arthroscopy of knee                                                                                            | 15.2%                      |
|                                                                                     | Tonsillectomy and/or adenoidectomy                                                                             | 14.2%                      |
| Cesarean section                                                                    | 8.2%                                                                                                           |                            |

## CROSSWALK BETWEEN SURGERY-RELATED CPT CODES AND PROCEDURE TYPE

| Code  | Code description                                                                                                                                                                                   | Procedure type                                                    |
|-------|----------------------------------------------------------------------------------------------------------------------------------------------------------------------------------------------------|-------------------------------------------------------------------|
| 49900 | Suture, secondary, of abdominal wall for evisceration or dehiscence                                                                                                                                | Abdominal wall repair, dehiscence                                 |
| 51845 | Abdomino-vaginal vesical neck suspension, with or without endoscopic control (eg, Stamey, Raz, modified Pereyra)                                                                                   | Abdomino-vaginal vesical neck suspension                          |
| 50541 | Laparoscopy, surgical; ablation of renal cysts                                                                                                                                                     | Ablation of intra-abdominal tumor or benign lesion - laparoscopic |
| 50542 | Laparoscopy, surgical; ablation of renal mass lesion(s), including intraoperative ultrasound guidance and monitoring, when performed                                                               | Ablation of intra-abdominal tumor or benign lesion - laparoscopic |
| 47370 | Laparoscopy, surgical, ablation of 1 or more liver tumor(s); radiofrequency                                                                                                                        | Ablation of intra-abdominal tumor or benign lesion - laparoscopic |
| 47371 | Laparoscopy, surgical, ablation of 1 or more liver tumor(s); cryosurgical                                                                                                                          | Ablation of intra-abdominal tumor or benign lesion - laparoscopic |
| 47380 | Ablation - open, of 1 or more liver tumor(s); radiofrequency                                                                                                                                       | Ablation of intraabdominal tumor or benign lesion — open          |
| 50250 | Ablation - open, 1 or more renal mass lesion(s), cryosurgical, including intraoperative ultrasound guidance and monitoring, if performed                                                           | Ablation of intraabdominal tumor or benign lesion — open          |
| 47381 | Ablation - open, of 1 or more liver tumor(s); cryosurgical                                                                                                                                         | Ablation of intraabdominal tumor or benign lesion — open          |
| 27120 | Acetabuloplasty; (eg, Whitman, Colonna, Haygroves, or cup type)                                                                                                                                    | Acetabuloplasty                                                   |
| 27122 | Acetabuloplasty; resection, femoral head (eg, Girdlestone procedure)                                                                                                                               | Acetabuloplasty                                                   |
| 23130 | Acromioplasty or acromionectomy, partial, with or without coracoacromial ligament release                                                                                                          | Acromioplasty or acromionectomy                                   |
| 14001 | Adjacent tissue transfer or rearrangement, trunk; defect 10.1 sq cm to 30.0 sq cm                                                                                                                  | Adjacent tissue transfer or rearrangement                         |
| 14040 | Adjacent tissue transfer or rearrangement, forehead, cheeks, chin, mouth, neck, axillae, genitalia, hands and/or feet; defect 10 sq cm or less                                                     | Adjacent tissue transfer or rearrangement                         |
| 14301 | Adjacent tissue transfer or rearrangement, any area; defect 30.1 sq cm to 60.0 sq cm                                                                                                               | Adjacent tissue transfer or rearrangement                         |
| 14021 | Adjacent tissue transfer or rearrangement, scalp, arms and/or legs; defect 10.1 sq cm to 30.0 sq cm                                                                                                | Adjacent tissue transfer or rearrangement                         |
| 14020 | Adjacent tissue transfer or rearrangement, scalp, arms and/or legs; defect 10 sq cm or less                                                                                                        | Adjacent tissue transfer or rearrangement                         |
| 14060 | Adjacent tissue transfer or rearrangement, eyelids, nose, ears and/or lips; defect 10 sq cm or less                                                                                                | Adjacent tissue transfer or rearrangement                         |
| 14041 | Adjacent tissue transfer or rearrangement, forehead, cheeks, chin, mouth, neck, axillae, genitalia, hands and/or feet; defect 10.1 sq cm to 30.0 sq cm                                             | Adjacent tissue transfer or rearrangement                         |
| 14061 | Adjacent tissue transfer or rearrangement, eyelids, nose, ears and/or lips; defect 10.1 sq cm to 30.0 sq cm                                                                                        | Adjacent tissue transfer or rearrangement                         |
| 14000 | Adjacent tissue transfer or rearrangement, trunk; defect 10 sq cm or less                                                                                                                          | Adjacent tissue transfer or rearrangement                         |
| 60650 | Laparoscopy, surgical, with adrenalectomy, partial or complete, or exploration of adrenal gland with or without biopsy, transabdominal, lumbar or dorsal                                           | Adrenalectomy - laparoscopic                                      |
| 60545 | Adrenalectomy, partial or complete, or exploration of adrenal gland with or without biopsy, transabdominal, lumbar or dorsal (separate procedure); with excision of adjacent retroperitoneal tumor | Adrenalectomy - open                                              |
| 60540 | Adrenalectomy, partial or complete, or exploration of adrenal gland with or without biopsy, transabdominal, lumbar or dorsal (separate procedure);                                                 | Adrenalectomy - open                                              |
| 41830 | Alveolectomy, including curettage of osteitis or sequestrectomy                                                                                                                                    | Alveolectomy                                                      |
| 41874 | Alveoloplasty, each quadrant (specify)                                                                                                                                                             | Alveoloplasty                                                     |
| 27888 | Amputation, ankle, through malleoli of tibia and fibula (eg, Syme, Pirogoff type procedures), with plastic closure and resection of nerves                                                         | Amputation of lower extremity                                     |
| 27889 | Ankle disarticulation                                                                                                                                                                              | Amputation of lower extremity                                     |
| 28810 | Amputation, metatarsal, with toe, single                                                                                                                                                           | Amputation of lower extremity                                     |
| 28820 | Amputation, toe; metatarsophalangeal joint                                                                                                                                                         | Amputation of lower extremity                                     |
| 28800 | Amputation, foot; midtarsal (eg, Chopart type procedure)                                                                                                                                           | Amputation of lower extremity                                     |
| 28825 | Amputation, toe; interphalangeal joint                                                                                                                                                             | Amputation of lower extremity                                     |
| 28805 | Amputation, foot; transmetatarsal                                                                                                                                                                  | Amputation of lower extremity                                     |
| 27290 | Interpelviabdominal amputation (hindquarter amputation)                                                                                                                                            | Amputation of lower extremity                                     |
| 27295 | Disarticulation of hip                                                                                                                                                                             | Amputation of lower extremity                                     |
| 27592 | Amputation, thigh, through femur, any level; open, circular (guillotine)                                                                                                                           | Amputation of lower extremity                                     |

| Continued |                                                                                                                                                                                                                                                                     |                                |
|-----------|---------------------------------------------------------------------------------------------------------------------------------------------------------------------------------------------------------------------------------------------------------------------|--------------------------------|
| Code      | Code description                                                                                                                                                                                                                                                    | Procedure type                 |
| 27598     | Disarticulation at knee                                                                                                                                                                                                                                             | Amputation of lower extremity  |
| 27882     | Amputation, leg, through tibia and fibula; open, circular (guillotine)                                                                                                                                                                                              | Amputation of lower extremity  |
| 27596     | Amputation, thigh, through femur, any level; re-amputation                                                                                                                                                                                                          | Amputation of lower extremity  |
| 27590     | Amputation, thigh, through femur, any level;                                                                                                                                                                                                                        | Amputation of lower extremity  |
| 27884     | Amputation, leg, through tibia and fibula; secondary closure or scar revision                                                                                                                                                                                       | Amputation of lower extremity  |
| 27881     | Amputation, leg, through tibia and fibula; with immediate fitting technique including application of first cast                                                                                                                                                     | Amputation of lower extremity  |
| 27886     | Amputation, leg, through tibia and fibula; re-amputation                                                                                                                                                                                                            | Amputation of lower extremity  |
| 27594     | Amputation, thigh, through femur, any level; secondary closure or scar revision                                                                                                                                                                                     | Amputation of lower extremity  |
| 27591     | Amputation, thigh, through femur, any level; immediate fitting technique including first cast                                                                                                                                                                       | Amputation of lower extremity  |
| 27880     | Amputation, leg, through tibia and fibula;                                                                                                                                                                                                                          | Amputation of lower extremity  |
| 54130     | Amputation of penis, radical; with bilateral inguofemoral lymphadenectomy                                                                                                                                                                                           | Amputation of penis            |
| 54135     | Amputation of penis, radical; in continuity with bilateral pelvic lymphadenectomy, including external iliac, hypogastric and obturator nodes                                                                                                                        | Amputation of penis            |
| 54120     | Amputation of penis; partial                                                                                                                                                                                                                                        | Amputation of penis            |
| 54125     | Amputation of penis; complete                                                                                                                                                                                                                                       | Amputation of penis            |
| 26910     | Amputation, metacarpal, with finger or thumb (ray amputation), single, with or without interosseous transfer                                                                                                                                                        | Amputation of upper extremity  |
| 26952     | Amputation, finger or thumb, primary or secondary, any joint or phalanx, single, including neurectomies; with local advancement flaps (V-Y, hood)                                                                                                                   | Amputation of upper extremity  |
| 26951     | Amputation, finger or thumb, primary or secondary, any joint or phalanx, single, including neurectomies; with direct closure                                                                                                                                        | Amputation of upper extremity  |
| 25931     | Transmetacarpal amputation; re-amputation                                                                                                                                                                                                                           | Amputation of upper extremity  |
| 25929     | Transmetacarpal amputation; secondary closure or scar revision                                                                                                                                                                                                      | Amputation of upper extremity  |
| 25927     | Transmetacarpal amputation;                                                                                                                                                                                                                                         | Amputation of upper extremity  |
| 23900     | Interthoracoscapular amputation (forequarter)                                                                                                                                                                                                                       | Amputation of upper extremity  |
| 25907     | Amputation, forearm, through radius and ulna; secondary closure or scar revision                                                                                                                                                                                    | Amputation of upper extremity  |
| 25909     | Amputation, forearm, through radius and ulna; re-amputation                                                                                                                                                                                                         | Amputation of upper extremity  |
| 25905     | Amputation, forearm, through radius and ulna; open, circular (guillotine)                                                                                                                                                                                           | Amputation of upper extremity  |
| 24900     | Amputation, arm through humerus; with primary closure                                                                                                                                                                                                               | Amputation of upper extremity  |
| 24930     | Amputation, arm through humerus; re-amputation                                                                                                                                                                                                                      | Amputation of upper extremity  |
| 24931     | Amputation, arm through humerus; with implant                                                                                                                                                                                                                       | Amputation of upper extremity  |
| 24920     | Amputation, arm through humerus; open, circular (guillotine)                                                                                                                                                                                                        | Amputation of upper extremity  |
| 24925     | Amputation, arm through humerus; secondary closure or scar revision                                                                                                                                                                                                 | Amputation of upper extremity  |
| 25900     | Amputation, forearm, through radius and ulna;                                                                                                                                                                                                                       | Amputation of upper extremity  |
| 35102     | Direct repair of aneurysm, pseudoaneurysm, or excision (partial or total) and graft insertion, with or without patch graft; for aneurysm, pseudoaneurysm, and associated occlusive disease, abdominal aorta involving iliac vessels (common, hypogastric, external) | Aneurysm/pseudoaneurysm repair |
| 35091     | Direct repair of aneurysm, pseudoaneurysm, or excision (partial or total) and graft insertion, with or without patch graft; for aneurysm, pseudoaneurysm, and associated occlusive disease, abdominal aorta involving visceral vessels (mesenteric, celiac, renal)  | Aneurysm/pseudoaneurysm repair |
| 35092     | Direct repair of aneurysm, pseudoaneurysm, or excision (partial or total) and graft insertion, with or without patch graft; for ruptured aneurysm, abdominal aorta involving visceral vessels (mesenteric, celiac, renal)                                           | Aneurysm/pseudoaneurysm repair |
| 35103     | Direct repair of aneurysm, pseudoaneurysm, or excision (partial or total) and graft insertion, with or without patch graft; for ruptured aneurysm, abdominal aorta involving iliac vessels (common, hypogastric, external)                                          | Aneurysm/pseudoaneurysm repair |
| 35082     | Direct repair of aneurysm, pseudoaneurysm, or excision (partial or total) and graft insertion, with or without patch graft; for ruptured aneurysm, abdominal aorta                                                                                                  | Aneurysm/pseudoaneurysm repair |
| 35013     | Direct repair of aneurysm, pseudoaneurysm, or excision (partial or total) and graft insertion, with or without patch graft; for ruptured aneurysm, axillary- brachial artery, by arm incision                                                                       | Aneurysm/pseudoaneurysm repair |
| 35011     | Direct repair of aneurysm, pseudoaneurysm, or excision (partial or total) and graft insertion, with or without patch graft; for aneurysm and associated occlusive disease, axillary- brachial artery, by arm incision                                               | Aneurysm/pseudoaneurysm repair |

| Continued |                                                                                                                                                                                                                                                                                            |                                          |
|-----------|--------------------------------------------------------------------------------------------------------------------------------------------------------------------------------------------------------------------------------------------------------------------------------------------|------------------------------------------|
| Code      | Code description                                                                                                                                                                                                                                                                           | Procedure type                           |
| 35001     | Direct repair of aneurysm, pseudoaneurysm, or excision (partial or total) and graft insertion, with or without patch graft; for aneurysm and associated occlusive disease, carotid, subclavian artery, by neck incision                                                                    | Aneurysm/psuedoaneurysm repair           |
| 35002     | Direct repair of aneurysm, pseudoaneurysm, or excision (partial or total) and graft insertion, with or without patch graft; for ruptured aneurysm, carotid, subclavian artery, by neck incision                                                                                            | Aneurysm/psuedoaneurysm repair           |
| 35141     | Direct repair of aneurysm, pseudoaneurysm, or excision (partial or total) and graft insertion, with or without patch graft; for aneurysm, pseudoaneurysm, and associated occlusive disease, common femoral artery (profunda femoris, superficial femoral)                                  | Aneurysm/psuedoaneurysm repair           |
| 35121     | Direct repair of aneurysm, pseudoaneurysm, or excision (partial or total) and graft insertion, with or without patch graft; for aneurysm, pseudoaneurysm, and associated occlusive disease, hepatic, celiac, renal, or mesenteric artery                                                   | Aneurysm/psuedoaneurysm repair           |
| 35122     | Direct repair of aneurysm, pseudoaneurysm, or excision (partial or total) and graft insertion, with or without patch graft; for ruptured aneurysm, hepatic, celiac, renal, or mesenteric artery                                                                                            | Aneurysm/psuedoaneurysm repair           |
| 35131     | Direct repair of aneurysm, pseudoaneurysm, or excision (partial or total) and graft insertion, with or without patch graft; for aneurysm, pseudoaneurysm, and associated occlusive disease, iliac artery (common, hypogastric, external)                                                   | Aneurysm/psuedoaneurysm repair           |
| 35132     | Direct repair of aneurysm, pseudoaneurysm, or excision (partial or total) and graft insertion, with or without patch graft; for ruptured aneurysm, iliac artery (common, hypogastric, external)                                                                                            | Aneurysm/psuedoaneurysm repair           |
| 35081     | Direct repair of aneurysm, pseudoaneurysm, or excision (partial or total) and graft insertion, with or without patch graft; for aneurysm, pseudoaneurysm, and associated occlusive disease, abdominal aorta                                                                                | Aneurysm/psuedoaneurysm repair           |
| 35045     | Direct repair of aneurysm, pseudoaneurysm, or excision (partial or total) and graft insertion, with or without patch graft; for aneurysm, pseudoaneurysm, and associated occlusive disease, radial or ulnar artery                                                                         | Aneurysm/psuedoaneurysm repair           |
| 35111     | Direct repair of aneurysm, pseudoaneurysm, or excision (partial or total) and graft insertion, with or without patch graft; for aneurysm, pseudoaneurysm, and associated occlusive disease, splenic artery                                                                                 | Aneurysm/psuedoaneurysm repair           |
| 35112     | Direct repair of aneurysm, pseudoaneurysm, or excision (partial or total) and graft insertion, with or without patch graft; for ruptured aneurysm, splenic artery                                                                                                                          | Aneurysm/psuedoaneurysm repair           |
| 35021     | Direct repair of aneurysm, pseudoaneurysm, or excision (partial or total) and graft insertion, with or without patch graft; for aneurysm, pseudoaneurysm, and associated occlusive disease, innominate, subclavian artery, by thoracic incision                                            | Aneurysm/psuedoaneurysm repair           |
| 35022     | Direct repair of aneurysm, pseudoaneurysm, or excision (partial or total) and graft insertion, with or without patch graft; for ruptured aneurysm, innominate, subclavian artery, by thoracic incision                                                                                     | Aneurysm/psuedoaneurysm repair           |
| 35005     | Direct repair of aneurysm, pseudoaneurysm, or excision (partial or total) and graft insertion, with or without patch graft; for aneurysm, pseudoaneurysm, and associated occlusive disease, vertebral artery                                                                               | Aneurysm/psuedoaneurysm repair           |
| 35460     | Transluminal balloon angioplasty - open; venous                                                                                                                                                                                                                                            | Angioplasty - open                       |
| 35458     | Transluminal balloon angioplasty - open; brachiocephalic trunk or branches, each vessel                                                                                                                                                                                                    | Angioplasty - open                       |
| 35450     | Transluminal balloon angioplasty - open; renal or other visceral artery                                                                                                                                                                                                                    | Angioplasty - open                       |
| 35452     | Transluminal balloon angioplasty - open; aortic                                                                                                                                                                                                                                            | Angioplasty - open                       |
| 61630     | Balloon angioplasty, intracranial (eg, atherosclerotic stenosis), percutaneous                                                                                                                                                                                                             | Angioplasty, intracranial - percutaneous |
| 61640     | Balloon dilatation of intracranial vasospasm, percutaneous; initial vessel                                                                                                                                                                                                                 | Angioplasty, intracranial - percutaneous |
| 46700     | Anoplasty, plastic operation for stricture; adult                                                                                                                                                                                                                                          | Anoplasty                                |
| 46705     | Anoplasty, plastic operation for stricture; infant                                                                                                                                                                                                                                         | Anoplasty                                |
| 33866     | Aortic hemiarch graft including isolation and control of the arch vessels, beveled open distal aortic anastomosis extending under one or more of the arch vessels, and total circulatory arrest or isolated cerebral perfusion (List separately in addition to code for primary procedure) | Aortic reconstruction/repair             |
| 33871     | Transverse aortic arch graft, with cardiopulmonary bypass, with profound hypothermia, total circulatory arrest and isolated cerebral perfusion with reimplantation of arch vessel(s) (eg, island pedicle or individual arch vessel reimplantation)                                         | Aortic reconstruction/repair             |
| 33321     | Suture repair of aorta or great vessels; with shunt bypass                                                                                                                                                                                                                                 | Aortic reconstruction/repair             |

| Continued |                                                                                                                                                                                                                                                                                                                                                                                                                                                                                                                                                                                                                                                                       |                              |
|-----------|-----------------------------------------------------------------------------------------------------------------------------------------------------------------------------------------------------------------------------------------------------------------------------------------------------------------------------------------------------------------------------------------------------------------------------------------------------------------------------------------------------------------------------------------------------------------------------------------------------------------------------------------------------------------------|------------------------------|
| Code      | Code description                                                                                                                                                                                                                                                                                                                                                                                                                                                                                                                                                                                                                                                      | Procedure type               |
| 33320     | Suture repair of aorta or great vessels; without shunt or cardiopulmonary bypass                                                                                                                                                                                                                                                                                                                                                                                                                                                                                                                                                                                      | Aortic reconstruction/repair |
| 33870     | Transverse arch graft, with cardiopulmonary bypass                                                                                                                                                                                                                                                                                                                                                                                                                                                                                                                                                                                                                    | Aortic reconstruction/repair |
| 33860     | Ascending aorta graft, with cardiopulmonary bypass, includes valve suspension, when performed                                                                                                                                                                                                                                                                                                                                                                                                                                                                                                                                                                         | Aortic reconstruction/repair |
| 33864     | Ascending aorta graft, with cardiopulmonary bypass with valve suspension, with coronary reconstruction and valve-sparing aortic root remodeling (eg, David Procedure, Yacoub Procedure)                                                                                                                                                                                                                                                                                                                                                                                                                                                                               | Aortic reconstruction/repair |
| 33863     | Ascending aorta graft, with cardiopulmonary bypass, with aortic root replacement using valved conduit and coronary reconstruction (eg, Bentall)                                                                                                                                                                                                                                                                                                                                                                                                                                                                                                                       | Aortic reconstruction/repair |
| 33859     | Ascending aorta graft, with cardiopulmonary bypass, includes valve suspension, when performed; for aortic disease other than dissection (eg, aneurysm)                                                                                                                                                                                                                                                                                                                                                                                                                                                                                                                | Aortic reconstruction/repair |
| 33404     | Construction of apical-aortic conduit                                                                                                                                                                                                                                                                                                                                                                                                                                                                                                                                                                                                                                 | Aortic reconstruction/repair |
| 33330     | Insertion of graft, aorta or great vessels; without shunt, or cardiopulmonary bypass                                                                                                                                                                                                                                                                                                                                                                                                                                                                                                                                                                                  | Aortic reconstruction/repair |
| 33335     | Insertion of graft, aorta or great vessels; with cardiopulmonary bypass                                                                                                                                                                                                                                                                                                                                                                                                                                                                                                                                                                                               | Aortic reconstruction/repair |
| 33322     | Suture repair of aorta or great vessels; with cardiopulmonary bypass                                                                                                                                                                                                                                                                                                                                                                                                                                                                                                                                                                                                  | Aortic reconstruction/repair |
| 33332     | Insertion of graft, aorta or great vessels; with shunt bypass                                                                                                                                                                                                                                                                                                                                                                                                                                                                                                                                                                                                         | Aortic reconstruction/repair |
| 33858     | Ascending aorta graft, with cardiopulmonary bypass, includes valve suspension, when performed; for aortic dissection                                                                                                                                                                                                                                                                                                                                                                                                                                                                                                                                                  | Aortic reconstruction/repair |
| 34841     | Endovascular repair of visceral aorta (eg, aneurysm, pseudoaneurysm, dissection, penetrating ulcer, intramural hematoma, or traumatic disruption) by deployment of a fenestrated visceral aortic endograft and all associated radiological supervision and interpretation, including target zone angioplasty, when performed; including one visceral artery endoprosthesis (superior mesenteric, celiac or renal artery)                                                                                                                                                                                                                                              | Aortic reconstruction/repair |
| 75958     | Placement of proximal extension prosthesis for endovascular repair of descending thoracic aorta (eg, aneurysm, pseudoaneurysm, dissection, penetrating ulcer, intramural hematoma, or traumatic disruption), radiological supervision and interpretation                                                                                                                                                                                                                                                                                                                                                                                                              | Aortic reconstruction/repair |
| 34825     | Placement of proximal or distal extension prosthesis for endovascular repair of infrarenal abdominal aortic or iliac aneurysm, false aneurysm, or dissection; initial vessel                                                                                                                                                                                                                                                                                                                                                                                                                                                                                          | Aortic reconstruction/repair |
| 34846     | Endovascular repair of visceral aorta and infrarenal abdominal aorta (eg, aneurysm, pseudoaneurysm, dissection, penetrating ulcer, intramural hematoma, or traumatic disruption) with a fenestrated visceral aortic endograft and concomitant unibody or modular infrarenal aortic endograft and all associated radiological supervision and interpretation, including target zone angioplasty, when performed; including two visceral artery endoprostheses (superior mesenteric, celiac and/or renal artery[s])                                                                                                                                                     | Aortic reconstruction/repair |
| 34705     | Endovascular repair of infrarenal aorta and/or iliac artery(ies) by deployment of an aorto-bi-iliac endograft including pre-procedure sizing and device selection, all nonselective catheterization(s), all associated radiological supervision and interpretation, all endograft extension(s) placed in the aorta from the level of the renal arteries to the iliac bifurcation, and all angioplasty/stenting performed from the level of the renal arteries to the iliac bifurcation; for other than rupture (eg, for aneurysm, pseudoaneurysm, dissection, penetrating ulcer)                                                                                      | Aortic reconstruction/repair |
| 34845     | Endovascular repair of visceral aorta and infrarenal abdominal aorta (eg, aneurysm, pseudoaneurysm, dissection, penetrating ulcer, intramural hematoma, or traumatic disruption) with a fenestrated visceral aortic endograft and concomitant unibody or modular infrarenal aortic endograft and all associated radiological supervision and interpretation, including target zone angioplasty, when performed; including one visceral artery endoprosthesis (superior mesenteric, celiac or renal artery)                                                                                                                                                            | Aortic reconstruction/repair |
| 34804     | Endovascular repair of infrarenal abdominal aortic aneurysm or dissection; using unibody bifurcated prosthesis                                                                                                                                                                                                                                                                                                                                                                                                                                                                                                                                                        | Aortic reconstruction/repair |
| 75959     | Placement of distal extension prosthesis(s) (delayed) after endovascular repair of descending thoracic aorta, as needed, to level of celiac origin, radiological supervision and interpretation                                                                                                                                                                                                                                                                                                                                                                                                                                                                       | Aortic reconstruction/repair |
| 34706     | Endovascular repair of infrarenal aorta and/or iliac artery(ies) by deployment of an aorto-bi-iliac endograft including pre-procedure sizing and device selection, all nonselective catheterization(s), all associated radiological supervision and interpretation, all endograft extension(s) placed in the aorta from the level of the renal arteries to the iliac bifurcation, and all angioplasty/stenting performed from the level of the renal arteries to the iliac bifurcation; for rupture including temporary aortic and/or iliac balloon occlusion, when performed (eg, for aneurysm, pseudoaneurysm, dissection, penetrating ulcer, traumatic disruption) | Aortic reconstruction/repair |

| Continued |                                                                                                                                                                                                                                                                                                                                                                                                                                                                                                                                                                                                                                                                        |                              |
|-----------|------------------------------------------------------------------------------------------------------------------------------------------------------------------------------------------------------------------------------------------------------------------------------------------------------------------------------------------------------------------------------------------------------------------------------------------------------------------------------------------------------------------------------------------------------------------------------------------------------------------------------------------------------------------------|------------------------------|
| Code      | Code description                                                                                                                                                                                                                                                                                                                                                                                                                                                                                                                                                                                                                                                       | Procedure type               |
| 34847     | Endovascular repair of visceral aorta and infrarenal abdominal aorta (eg, aneurysm, pseudoaneurysm, dissection, penetrating ulcer, intramural hematoma, or traumatic disruption) with a fenestrated visceral aortic endograft and concomitant unibody or modular infrarenal aortic endograft and all associated radiological supervision and interpretation, including target zone angioplasty, when performed; including three visceral artery endoprostheses (superior mesenteric, celiac and/or renal artery[s])                                                                                                                                                    | Aortic reconstruction/repair |
| 34842     | Endovascular repair of visceral aorta (eg, aneurysm, pseudoaneurysm, dissection, penetrating ulcer, intramural hematoma, or traumatic disruption) by deployment of a fenestrated visceral aortic endograft and all associated radiological supervision and interpretation, including target zone angioplasty, when performed; including two visceral artery endoprostheses (superior mesenteric, celiac and/or renal artery[s])                                                                                                                                                                                                                                        | Aortic reconstruction/repair |
| 33883     | Placement of proximal extension prosthesis for endovascular repair of descending thoracic aorta (eg, aneurysm, pseudoaneurysm, dissection, penetrating ulcer, intramural hematoma, or traumatic disruption); initial extension                                                                                                                                                                                                                                                                                                                                                                                                                                         | Aortic reconstruction/repair |
| 34802     | Endovascular repair of infrarenal abdominal aortic aneurysm or dissection; using modular bifurcated prosthesis (1 docking limb)                                                                                                                                                                                                                                                                                                                                                                                                                                                                                                                                        | Aortic reconstruction/repair |
| 34803     | Endovascular repair of infrarenal abdominal aortic aneurysm or dissection; using modular bifurcated prosthesis (2 docking limbs)                                                                                                                                                                                                                                                                                                                                                                                                                                                                                                                                       | Aortic reconstruction/repair |
| 34712     | Transcatheter delivery of enhanced fixation device(s) to the endograft (eg, anchor, screw, tack) and all associated radiological supervision and interpretation                                                                                                                                                                                                                                                                                                                                                                                                                                                                                                        | Aortic reconstruction/repair |
| 34800     | Endovascular repair of infrarenal abdominal aortic aneurysm or dissection; using aorto-aortic tube prosthesis                                                                                                                                                                                                                                                                                                                                                                                                                                                                                                                                                          | Aortic reconstruction/repair |
| 34805     | Endovascular repair of infrarenal abdominal aortic aneurysm or dissection; using aorto-uniiliac or aorto-unifemoral prosthesis                                                                                                                                                                                                                                                                                                                                                                                                                                                                                                                                         | Aortic reconstruction/repair |
| 34710     | Delayed placement of distal or proximal extension prosthesis for endovascular repair of infrarenal abdominal aortic or iliac aneurysm, false aneurysm, dissection, endoleak, or endograft migration, including pre-procedure sizing and device selection, all nonselective catheterization(s), all associated radiological supervision and interpretation, and treatment zone angioplasty/stenting, when performed; initial vessel treated                                                                                                                                                                                                                             | Aortic reconstruction/repair |
| 34843     | Endovascular repair of visceral aorta (eg, aneurysm, pseudoaneurysm, dissection, penetrating ulcer, intramural hematoma, or traumatic disruption) by deployment of a fenestrated visceral aortic endograft and all associated radiological supervision and interpretation, including target zone angioplasty, when performed; including three visceral artery endoprostheses (superior mesenteric, celiac and/or renal artery[s])                                                                                                                                                                                                                                      | Aortic reconstruction/repair |
| 33886     | Placement of distal extension prosthesis(s) delayed after endovascular repair of descending thoracic aorta                                                                                                                                                                                                                                                                                                                                                                                                                                                                                                                                                             | Aortic reconstruction/repair |
| 34704     | Endovascular repair of infrarenal aorta and/or iliac artery(ies) by deployment of an aorto-uni-iliac endograft including pre-procedure sizing and device selection, all nonselective catheterization(s), all associated radiological supervision and interpretation, all endograft extension(s) placed in the aorta from the level of the renal arteries to the iliac bifurcation, and all angioplasty/stenting performed from the level of the renal arteries to the iliac bifurcation; for rupture including temporary aortic and/or iliac balloon occlusion, when performed (eg, for aneurysm, pseudoaneurysm, dissection, penetrating ulcer, traumatic disruption) | Aortic reconstruction/repair |
| 34701     | Endovascular repair of infrarenal aorta by deployment of an aorto-aortic tube endograft including pre-procedure sizing and device selection, all nonselective catheterization(s), all associated radiological supervision and interpretation, all endograft extension(s) placed in the aorta from the level of the renal arteries to the aortic bifurcation, and all angioplasty/stenting performed from the level of the renal arteries to the aortic bifurcation; for other than rupture (eg, for aneurysm, pseudoaneurysm, dissection, penetrating ulcer)                                                                                                           | Aortic reconstruction/repair |
| 33881     | Endovascular repair of descending thoracic aorta (eg, aneurysm, pseudoaneurysm, dissection, penetrating ulcer, intramural hematoma, or traumatic disruption); not involving coverage of left subclavian artery origin, initial endoprosthesis plus descending thoracic aortic extension(s), if required, to level of celiac artery origin                                                                                                                                                                                                                                                                                                                              | Aortic reconstruction/repair |
| 34702     | Endovascular repair of infrarenal aorta by deployment of an aorto-aortic tube endograft including pre-procedure sizing and device selection, all nonselective catheterization(s), all associated radiological supervision and interpretation, all endograft extension(s) placed in the aorta from the level of the renal arteries to the aortic bifurcation, and all angioplasty/stenting performed from the level of the renal arteries to the aortic bifurcation; for rupture including temporary aortic and/or iliac balloon occlusion, when performed (eg, for aneurysm, pseudoaneurysm, dissection, penetrating ulcer, traumatic disruption)                      | Aortic reconstruction/repair |

| Continued |                                                                                                                                                                                                                                                                                                                                                                                                                                                                                                                                                                                   |                                                                                        |
|-----------|-----------------------------------------------------------------------------------------------------------------------------------------------------------------------------------------------------------------------------------------------------------------------------------------------------------------------------------------------------------------------------------------------------------------------------------------------------------------------------------------------------------------------------------------------------------------------------------|----------------------------------------------------------------------------------------|
| Code      | Code description                                                                                                                                                                                                                                                                                                                                                                                                                                                                                                                                                                  | Procedure type                                                                         |
| 34703     | Endovascular repair of infrarenal aorta and/or iliac artery(ies) by deployment of an aorto-uni-iliac endograft including pre-procedure sizing and device selection, all nonselective catheterization(s), all associated radiological supervision and interpretation, all endograft extension(s) placed in the aorta from the level of the renal arteries to the iliac bifurcation, and all angioplasty/stenting performed from the level of the renal arteries to the iliac bifurcation; for other than rupture (eg, for aneurysm, pseudoaneurysm, dissection, penetrating ulcer) | Aortic reconstruction/repair                                                           |
| 33880     | Endovascular repair of descending thoracic aorta (eg, aneurysm, pseudoaneurysm, dissection, penetrating ulcer, intramural hematoma, or traumatic disruption); involving coverage of left subclavian artery origin, initial endoprosthesis plus descending thoracic aortic extension(s), if required, to level of celiac artery origin                                                                                                                                                                                                                                             | Aortic reconstruction/repair                                                           |
| 34848     | Endovascular repair of visceral aorta and infrarenal abdominal aorta (eg, aneurysm, pseudoaneurysm, dissection, penetrating ulcer, intramural hematoma, or traumatic disruption) with a fenestrated visceral aortic endograft and concomitant unibody or modular infrarenal aortic endograft and all associated radiological supervision and interpretation, including target zone angioplasty, when performed; including four or more visceral artery endoprostheses (superior mesenteric, celiac and/or renal artery[s])                                                        | Aortic reconstruction/repair                                                           |
| 75956     | Endovascular repair of descending thoracic aorta (eg, aneurysm, pseudoaneurysm, dissection, penetrating ulcer, intramural hematoma, or traumatic disruption); involving coverage of left subclavian artery origin, initial endoprosthesis plus descending thoracic aortic extension(s), if required, to level of celiac artery origin, radiological supervision and interpretation                                                                                                                                                                                                | Aortic reconstruction/repair                                                           |
| 34844     | Endovascular repair of visceral aorta (eg, aneurysm, pseudoaneurysm, dissection, penetrating ulcer, intramural hematoma, or traumatic disruption) by deployment of a fenestrated visceral aortic endograft and all associated radiological supervision and interpretation, including target zone angioplasty, when performed; including four or more visceral artery endoprostheses (superior mesenteric, celiac and/or renal artery[s])                                                                                                                                          | Aortic reconstruction/repair                                                           |
| 75957     | Endovascular repair of descending thoracic aorta (eg, aneurysm, pseudoaneurysm, dissection, penetrating ulcer, intramural hematoma, or traumatic disruption); not involving coverage of left subclavian artery origin, initial endoprosthesis plus descending thoracic aortic extension(s), if required, to level of celiac artery origin, radiological supervision and interpretation                                                                                                                                                                                            | Aortic reconstruction/repair                                                           |
| 33877     | Repair of thoracoabdominal aortic aneurysm with graft, with or without cardiopulmonary bypass                                                                                                                                                                                                                                                                                                                                                                                                                                                                                     | Aortic reconstruction/repair                                                           |
| 33875     | Descending thoracic aorta graft, with or without bypass                                                                                                                                                                                                                                                                                                                                                                                                                                                                                                                           | Aortic reconstruction/repair                                                           |
| 33783     | Aortic root translocation with ventricular septal defect and pulmonary stenosis repair (ie, Nikaidoh procedure); with reimplantation of 1 or both coronary ostia                                                                                                                                                                                                                                                                                                                                                                                                                  | Aortic root translocation with ventricular septal defect and pulmonary stenosis repair |
| 33782     | Aortic root translocation with ventricular septal defect and pulmonary stenosis repair (ie, Nikaidoh procedure); without coronary ostium reimplantation                                                                                                                                                                                                                                                                                                                                                                                                                           | Aortic root translocation with ventricular septal defect and pulmonary stenosis repair |
| 33800     | Aortic suspension (aortopexy) for tracheal decompression (eg, for tracheomalacia) (separate procedure)                                                                                                                                                                                                                                                                                                                                                                                                                                                                            | Aortic suspension for tracheal decompression                                           |
| 33410     | Replacement, aortic valve, with cardiopulmonary bypass; with stentless tissue valve                                                                                                                                                                                                                                                                                                                                                                                                                                                                                               | Aortic valve repair/replacement - open                                                 |
| 33411     | Replacement, aortic valve; with aortic annulus enlargement, noncoronary sinus                                                                                                                                                                                                                                                                                                                                                                                                                                                                                                     | Aortic valve repair/replacement - open                                                 |
| 33413     | Replacement, aortic valve; by translocation of autologous pulmonary valve with allograft replacement of pulmonary valve (Ross procedure)                                                                                                                                                                                                                                                                                                                                                                                                                                          | Aortic valve repair/replacement - open                                                 |
| 33440     | Replacement, aortic valve; by translocation of autologous pulmonary valve and transventricular aortic annulus enlargement of the left ventricular outflow tract with valved conduit replacement of pulmonary valve (Ross- Konno procedure)                                                                                                                                                                                                                                                                                                                                        | Aortic valve repair/replacement - open                                                 |
| 33405     | Replacement, aortic valve, with cardiopulmonary bypass; with prosthetic valve other than homograft or stentless valve                                                                                                                                                                                                                                                                                                                                                                                                                                                             | Aortic valve repair/replacement - open                                                 |
| 33401     | Valvuloplasty, aortic valve; open, with inflow occlusion                                                                                                                                                                                                                                                                                                                                                                                                                                                                                                                          | Aortic valve repair/replacement - open                                                 |
| 33406     | Replacement, aortic valve, with cardiopulmonary bypass; with allograft valve (freehand)                                                                                                                                                                                                                                                                                                                                                                                                                                                                                           | Aortic valve repair/replacement - open                                                 |
| 33390     | Valvuloplasty, aortic valve - open, with cardiopulmonary bypass; simple (ie, valvotomy, debridement, debulking, and/or simple commissural resuspension)                                                                                                                                                                                                                                                                                                                                                                                                                           | Aortic valve repair/replacement - open                                                 |
| 33400     | Valvuloplasty, aortic valve; open, with cardiopulmonary bypass                                                                                                                                                                                                                                                                                                                                                                                                                                                                                                                    | Aortic valve repair/replacement - open                                                 |
| 33403     | Valvuloplasty, aortic valve; using transventricular dilation, with cardiopulmonary bypass                                                                                                                                                                                                                                                                                                                                                                                                                                                                                         | Aortic valve repair/replacement - open                                                 |

| Continued |                                                                                                                                                                                                                                                                                       |                                                         |
|-----------|---------------------------------------------------------------------------------------------------------------------------------------------------------------------------------------------------------------------------------------------------------------------------------------|---------------------------------------------------------|
| Code      | Code description                                                                                                                                                                                                                                                                      | Procedure type                                          |
| 33412     | Replacement, aortic valve; with transventricular aortic annulus enlargement (Konno procedure)                                                                                                                                                                                         | Aortic valve repair/replacement - open                  |
| 33602     | Closure of semilunar valve (aortic or pulmonary) by suture or patch                                                                                                                                                                                                                   | Aortic valve repair/replacement - open                  |
| 33391     | Valvuloplasty, aortic valve - open, with cardiopulmonary bypass; complex (eg, leaflet extension, leaflet resection, leaflet reconstruction, or annuloplasty)                                                                                                                          | Aortic valve repair/replacement - open                  |
| 33417     | Aortoplasty (gusset) for supraaortic stenosis                                                                                                                                                                                                                                         | Aortoplasty (gusset) for supraaortic stenosis           |
| 44970     | Laparoscopy, surgical, appendectomy                                                                                                                                                                                                                                                   | Appendectomy - laparoscopic                             |
| 44950     | Appendectomy;                                                                                                                                                                                                                                                                         | Appendectomy - open                                     |
| 44960     | Appendectomy; for ruptured appendix with abscess or generalized peritonitis                                                                                                                                                                                                           | Appendectomy - open                                     |
| 20690     | Application of a uniplane (pins or wires in 1 plane), unilateral, external fixation system                                                                                                                                                                                            | Application of external fixation system                 |
| 20697     | Application of multiplane (pins or wires in more than 1 plane), unilateral, external fixation with stereotactic computer-assisted adjustment (eg, spatial frame), including imaging; exchange (ie, removal and replacement) of strut, each                                            | Application of external fixation system                 |
| 20692     | Application of a multiplane (pins or wires in more than 1 plane), unilateral, external fixation system (eg, Ilizarov, Monticelli type)                                                                                                                                                | Application of external fixation system                 |
| 20696     | Application of multiplane (pins or wires in more than 1 plane), unilateral, external fixation with stereotactic computer-assisted adjustment (eg, spatial frame), including imaging; initial and subsequent alignment(s), assessment(s), and computation(s) of adjustment schedule(s) | Application of external fixation system                 |
| 20693     | Adjustment or revision of external fixation system requiring anesthesia (eg, new pin[s] or wire[s] and/or new ring[s] or bar[s])                                                                                                                                                      | Application of external fixation system                 |
| 20661     | Application of halo, including removal; cranial                                                                                                                                                                                                                                       | Application of halo, including removal                  |
| 20664     | Application of halo, including removal, cranial, 6 or more pins placed, for thin skull osteology (eg, pediatric patients, hydrocephalus, osteogenesis imperfecta)                                                                                                                     | Application of halo, including removal                  |
| 33620     | Application of right and left pulmonary artery bands (eg, hybrid approach stage 1)                                                                                                                                                                                                    | Application of right and left pulmonary artery bands    |
| 66180     | Aqueous shunt to extraocular reservoir (eg, Molteno, Schocket, Denver- Krupin)                                                                                                                                                                                                        | Aqueous shunt to extraocular equatorial plate reservoir |
| 35526     | Bypass graft, with vein; aortosubclavian, aortoinnominate, or aortocarotid                                                                                                                                                                                                            | Arterial bypass                                         |
| 35540     | Bypass graft, with vein; aortobifemoral                                                                                                                                                                                                                                               | Arterial bypass                                         |
| 35539     | Bypass graft, with vein; aortofemoral                                                                                                                                                                                                                                                 | Arterial bypass                                         |
| 35538     | Bypass graft, with vein; aortobi-iliac                                                                                                                                                                                                                                                | Arterial bypass                                         |
| 35537     | Bypass graft, with vein; aortoiliac                                                                                                                                                                                                                                                   | Arterial bypass                                         |
| 35560     | Bypass graft, with vein; aortorenal                                                                                                                                                                                                                                                   | Arterial bypass                                         |
| 35522     | Bypass graft, with vein; axillary-brachial                                                                                                                                                                                                                                            | Arterial bypass                                         |
| 35518     | Bypass graft, with vein; axillary-axillary                                                                                                                                                                                                                                            | Arterial bypass                                         |
| 35621     | Bypass graft, with other than vein; axillary-femoral                                                                                                                                                                                                                                  | Arterial bypass                                         |
| 35533     | Bypass graft, with vein; axillary-femoral-femoral                                                                                                                                                                                                                                     | Arterial bypass                                         |
| 35521     | Bypass graft, with vein; axillary-femoral                                                                                                                                                                                                                                             | Arterial bypass                                         |
| 35523     | Bypass graft, with vein; brachial-ulnar or -radial                                                                                                                                                                                                                                    | Arterial bypass                                         |
| 35525     | Bypass graft, with vein; brachial-brachial                                                                                                                                                                                                                                            | Arterial bypass                                         |
| 35506     | Bypass graft, with vein; carotid-subclavian or subclavian-carotid                                                                                                                                                                                                                     | Arterial bypass                                         |
| 35501     | Bypass graft, with vein; common carotid-ipsilateral internal carotid                                                                                                                                                                                                                  | Arterial bypass                                         |
| 35606     | Bypass graft, with other than vein; carotid-subclavian                                                                                                                                                                                                                                | Arterial bypass                                         |
| 35510     | Bypass graft, with vein; carotid-brachial                                                                                                                                                                                                                                             | Arterial bypass                                         |
| 35601     | Bypass graft, with other than vein; common carotid-ipsilateral internal carotid                                                                                                                                                                                                       | Arterial bypass                                         |
| 35509     | Bypass graft, with vein; carotid-contralateral carotid                                                                                                                                                                                                                                | Arterial bypass                                         |
| 35508     | Bypass graft, with vein; carotid-vertebral                                                                                                                                                                                                                                            | Arterial bypass                                         |
| 35571     | Bypass graft, with vein; popliteal-tibial, -peroneal artery or other distal vessels                                                                                                                                                                                                   | Arterial bypass                                         |
| 35570     | Bypass graft, with vein; tibial-tibial, peroneal-tibial, or tibial/peroneal trunk- tibial                                                                                                                                                                                             | Arterial bypass                                         |
| 35587     | In-situ vein bypass; popliteal-tibial, peroneal                                                                                                                                                                                                                                       | Arterial bypass                                         |
| 61711     | Anastomosis, arterial, extracranial-intracranial (eg, middle cerebral/cortical) arteries                                                                                                                                                                                              | Arterial bypass                                         |
| 35556     | Bypass graft, with vein; femoral-popliteal                                                                                                                                                                                                                                            | Arterial bypass                                         |
| 35585     | In-situ vein bypass; femoral-anterior tibial, posterior tibial, or peroneal artery                                                                                                                                                                                                    | Arterial bypass                                         |

| Continued |                                                                                                                                                                           |                                                  |
|-----------|---------------------------------------------------------------------------------------------------------------------------------------------------------------------------|--------------------------------------------------|
| Code      | Code description                                                                                                                                                          | Procedure type                                   |
| 35583     | In-situ vein bypass; femoral-popliteal                                                                                                                                    | Arterial bypass                                  |
| 35566     | Bypass graft, with vein; femoral-anterior tibial, posterior tibial, peroneal artery or other distal vessels                                                               | Arterial bypass                                  |
| 35558     | Bypass graft, with vein; femoral-femoral                                                                                                                                  | Arterial bypass                                  |
| 35563     | Bypass graft, with vein; ilioiliac                                                                                                                                        | Arterial bypass                                  |
| 35565     | Bypass graft, with vein; iliofemoral                                                                                                                                      | Arterial bypass                                  |
| 35536     | Bypass graft, with vein; splenorenal                                                                                                                                      | Arterial bypass                                  |
| 35516     | Bypass graft, with vein; subclavian-axillary                                                                                                                              | Arterial bypass                                  |
| 35515     | Bypass graft, with vein; subclavian-vertebral                                                                                                                             | Arterial bypass                                  |
| 35616     | Bypass graft, with other than vein; subclavian-axillary                                                                                                                   | Arterial bypass                                  |
| 35612     | Bypass graft, with other than vein; subclavian-subclavian                                                                                                                 | Arterial bypass                                  |
| 35512     | Bypass graft, with vein; subclavian-brachial                                                                                                                              | Arterial bypass                                  |
| 35511     | Bypass graft, with vein; subclavian-subclavian                                                                                                                            | Arterial bypass                                  |
| 35516     | Bypass graft, with vein; subclavian-axillary                                                                                                                              | Arterial bypass                                  |
| 35515     | Bypass graft, with vein; subclavian-vertebral                                                                                                                             | Arterial bypass                                  |
| 35616     | Bypass graft, with other than vein; subclavian-axillary                                                                                                                   | Arterial bypass                                  |
| 35612     | Bypass graft, with other than vein; subclavian-subclavian                                                                                                                 | Arterial bypass                                  |
| 35512     | Bypass graft, with vein; subclavian-brachial                                                                                                                              | Arterial bypass                                  |
| 35511     | Bypass graft, with vein; subclavian-subclavian                                                                                                                            | Arterial bypass                                  |
| 35535     | Bypass graft, with vein; hepatorenal                                                                                                                                      | Arterial bypass                                  |
| 35695     | Transposition and/or reimplantation; carotid to subclavian artery                                                                                                         | Arterial transposition                           |
| 35694     | Transposition and/or reimplantation; subclavian to carotid artery                                                                                                         | Arterial transposition                           |
| 35691     | Transposition and/or reimplantation; vertebral to carotid artery                                                                                                          | Arterial transposition                           |
| 35693     | Transposition and/or reimplantation; vertebral to subclavian artery                                                                                                       | Arterial transposition                           |
| 36818     | Arteriovenous anastomosis - open; by upper arm cephalic vein transposition                                                                                                | Arteriovenous fistula creation or reconstruction |
| 36825     | Creation of arteriovenous fistula by other than direct arteriovenous anastomosis (separate procedure); autogenous graft                                                   | Arteriovenous fistula creation or reconstruction |
| 36830     | Creation of arteriovenous fistula by other than direct arteriovenous anastomosis (separate procedure); nonautogenous graft (eg, biological collagen, thermoplastic graft) | Arteriovenous fistula creation or reconstruction |
| 36820     | Arteriovenous anastomosis - open; by forearm vein transposition                                                                                                           | Arteriovenous fistula creation or reconstruction |
| 36819     | Arteriovenous anastomosis - open; by upper arm basilic vein transposition                                                                                                 | Arteriovenous fistula creation or reconstruction |
| 36821     | Arteriovenous anastomosis - open; direct, any site (eg, Cimino type) (separate procedure)                                                                                 | Arteriovenous fistula creation or reconstruction |
| 36838     | Distal revascularization and interval ligation (DRIL), upper extremity hemodialysis access (steal syndrome)                                                               | Arteriovenous fistula creation or reconstruction |
| 28737     | Arthrodesis, with tendon lengthening and advancement, midtarsal, tarsal navicular-cuneiform (eg, Miller type procedure)                                                   | Arthrodesis of lower extremity                   |
| 28725     | Arthrodesis; subtalar                                                                                                                                                     | Arthrodesis of lower extremity                   |
| 28750     | Arthrodesis, great toe; metatarsophalangeal joint                                                                                                                         | Arthrodesis of lower extremity                   |
| 28755     | Arthrodesis, great toe; interphalangeal joint                                                                                                                             | Arthrodesis of lower extremity                   |
| 28740     | Arthrodesis, midtarsal or tarsometatarsal, single joint                                                                                                                   | Arthrodesis of lower extremity                   |
| 28730     | Arthrodesis, midtarsal or tarsometatarsal, multiple or transverse;                                                                                                        | Arthrodesis of lower extremity                   |
| 28760     | Arthrodesis, with extensor hallucis longus transfer to first metatarsal neck, great toe, interphalangeal joint (eg, Jones type procedure)                                 | Arthrodesis of lower extremity                   |
| 28735     | Arthrodesis, midtarsal or tarsometatarsal, multiple or transverse; with osteotomy (eg, flatfoot correction)                                                               | Arthrodesis of lower extremity                   |
| 28705     | Arthrodesis; pantalar                                                                                                                                                     | Arthrodesis of lower extremity                   |
| 28715     | Arthrodesis; triple                                                                                                                                                       | Arthrodesis of lower extremity                   |
| 27580     | Arthrodesis, knee, any technique                                                                                                                                          | Arthrodesis of lower extremity                   |
| 27871     | Arthrodesis, tibiofibular joint, proximal or distal                                                                                                                       | Arthrodesis of lower extremity                   |
| 27870     | Arthrodesis, ankle - open                                                                                                                                                 | Arthrodesis of lower extremity                   |
| 27286     | Arthrodesis, hip joint (including obtaining graft); with subtrochanteric osteotomy                                                                                        | Arthrodesis of lower extremity                   |

| Continued |                                                                                                                                                                                                                                               |                                |
|-----------|-----------------------------------------------------------------------------------------------------------------------------------------------------------------------------------------------------------------------------------------------|--------------------------------|
| Code      | Code description                                                                                                                                                                                                                              | Procedure type                 |
| 27279     | Arthrodesis, sacroiliac joint, percutaneous or minimally invasive (indirect visualization), with image guidance, includes obtaining bone graft when performed, and placement of transfixing device                                            | Arthrodesis of lower extremity |
| 27280     | Arthrodesis, sacroiliac joint (including obtaining graft)                                                                                                                                                                                     | Arthrodesis of lower extremity |
| 27284     | Arthrodesis, hip joint (including obtaining graft);                                                                                                                                                                                           | Arthrodesis of lower extremity |
| 27282     | Arthrodesis, symphysis pubis (including obtaining graft)                                                                                                                                                                                      | Arthrodesis of lower extremity |
| 22808     | Arthrodesis, anterior, for spinal deformity, with or without cast; 2 to 3 vertebral segments                                                                                                                                                  | Arthrodesis of spine           |
| 22586     | Arthrodesis, pre-sacral interbody technique, including disc space preparation, discectomy, with posterior instrumentation, with image guidance, includes bone graft when performed, L5-S1 interspace                                          | Arthrodesis of spine           |
| 22595     | Arthrodesis, posterior technique, atlas-axis (C1-C2)                                                                                                                                                                                          | Arthrodesis of spine           |
| 22800     | Arthrodesis, posterior, for spinal deformity, with or without cast; up to 6 vertebral segments                                                                                                                                                | Arthrodesis of spine           |
| 22610     | Arthrodesis, posterior or posterolateral technique, single level; thoracic (with lateral transverse technique, when performed)                                                                                                                | Arthrodesis of spine           |
| 22551     | Arthrodesis, anterior interbody, including disc space preparation, discectomy, osteophyctectomy and decompression of spinal cord and/or nerve roots; cervical below C2                                                                        | Arthrodesis of spine           |
| 22804     | Arthrodesis, posterior, for spinal deformity, with or without cast; 13 or more vertebral segments                                                                                                                                             | Arthrodesis of spine           |
| 22630     | Arthrodesis, posterior interbody technique, including laminectomy and/or discectomy to prepare interspace (other than for decompression), single interspace; lumbar                                                                           | Arthrodesis of spine           |
| 22633     | Arthrodesis, combined posterior or posterolateral technique with posterior interbody technique including laminectomy and/or discectomy sufficient to prepare interspace (other than for decompression), single interspace and segment; lumbar | Arthrodesis of spine           |
| 22802     | Arthrodesis, posterior, for spinal deformity, with or without cast; 7 to 12 vertebral segments                                                                                                                                                | Arthrodesis of spine           |
| 22590     | Arthrodesis, posterior technique, craniocervical (occiput-C2)                                                                                                                                                                                 | Arthrodesis of spine           |
| 22810     | Arthrodesis, anterior, for spinal deformity, with or without cast; 4 to 7 vertebral segments                                                                                                                                                  | Arthrodesis of spine           |
| 22600     | Arthrodesis, posterior or posterolateral technique, single level; cervical below C2 segment                                                                                                                                                   | Arthrodesis of spine           |
| 22812     | Arthrodesis, anterior, for spinal deformity, with or without cast; 8 or more vertebral segments                                                                                                                                               | Arthrodesis of spine           |
| 22612     | Arthrodesis, posterior or posterolateral technique, single level; lumbar (with lateral transverse technique, when performed)                                                                                                                  | Arthrodesis of spine           |
| 22558     | Arthrodesis, anterior interbody technique, including minimal discectomy to prepare interspace (other than for decompression); lumbar                                                                                                          | Arthrodesis of spine           |
| 22533     | Arthrodesis, lateral extracavitary technique, including minimal discectomy to prepare interspace (other than for decompression); lumbar                                                                                                       | Arthrodesis of spine           |
| 22548     | Arthrodesis, anterior transoral or extraoral technique, clivus-C1-C2 (atlas- axis), with or without excision of odontoid process                                                                                                              | Arthrodesis of spine           |
| 22554     | Arthrodesis, anterior interbody technique, including minimal discectomy to prepare interspace (other than for decompression); cervical below C2                                                                                               | Arthrodesis of spine           |
| 22532     | Arthrodesis, lateral extracavitary technique, including minimal discectomy to prepare interspace (other than for decompression); thoracic                                                                                                     | Arthrodesis of spine           |
| 22556     | Arthrodesis, anterior interbody technique, including minimal discectomy to prepare interspace (other than for decompression); thoracic                                                                                                        | Arthrodesis of spine           |
| 24802     | Arthrodesis, elbow joint; with autogenous graft (includes obtaining graft)                                                                                                                                                                    | Arthrodesis of upper extremity |
| 24800     | Arthrodesis, elbow joint; local                                                                                                                                                                                                               | Arthrodesis of upper extremity |
| 26820     | Fusion in opposition, thumb, with autogenous graft (includes obtaining graft)                                                                                                                                                                 | Arthrodesis of upper extremity |
| 26850     | Arthrodesis, metacarpophalangeal joint, with or without internal fixation;                                                                                                                                                                    | Arthrodesis of upper extremity |
| 26862     | Arthrodesis, interphalangeal joint, with or without internal fixation; with autograft (includes obtaining graft)                                                                                                                              | Arthrodesis of upper extremity |
| 26844     | Arthrodesis, carpometacarpal joint, digit, other than thumb, each; with autograft (includes obtaining graft)                                                                                                                                  | Arthrodesis of upper extremity |
| 26860     | Arthrodesis, interphalangeal joint, with or without internal fixation;                                                                                                                                                                        | Arthrodesis of upper extremity |
| 26843     | Arthrodesis, carpometacarpal joint, digit, other than thumb, each;                                                                                                                                                                            | Arthrodesis of upper extremity |
| 26842     | Arthrodesis, carpometacarpal joint, thumb, with or without internal fixation; with autograft (includes obtaining graft)                                                                                                                       | Arthrodesis of upper extremity |
| 26841     | Arthrodesis, carpometacarpal joint, thumb, with or without internal fixation;                                                                                                                                                                 | Arthrodesis of upper extremity |

| Continued |                                                                                                                                        |                                 |
|-----------|----------------------------------------------------------------------------------------------------------------------------------------|---------------------------------|
| Code      | Code description                                                                                                                       | Procedure type                  |
| 26852     | Arthrodesis, metacarpophalangeal joint, with or without internal fixation; with autograft (includes obtaining graft)                   | Arthrodesis of upper extremity  |
| 23802     | Arthrodesis, glenohumeral joint; with autogenous graft (includes obtaining graft)                                                      | Arthrodesis of upper extremity  |
| 23800     | Arthrodesis, glenohumeral joint;                                                                                                       | Arthrodesis of upper extremity  |
| 25820     | Arthrodesis, wrist; limited, without bone graft (eg, intercarpal or radiocarpal)                                                       | Arthrodesis of upper extremity  |
| 25805     | Arthrodesis, wrist; with sliding graft                                                                                                 | Arthrodesis of upper extremity  |
| 25800     | Arthrodesis, wrist; complete, without bone graft (includes radiocarpal and/or intercarpal and/or carpometacarpal joints)               | Arthrodesis of upper extremity  |
| 25810     | Arthrodesis, wrist; with iliac or other autograft (includes obtaining graft)                                                           | Arthrodesis of upper extremity  |
| 25825     | Arthrodesis, wrist; with autograft (includes obtaining graft)                                                                          | Arthrodesis of upper extremity  |
| 25830     | Arthrodesis, distal radioulnar joint with segmental resection of ulna, with or without bone graft (eg, Sauve-Kapandji procedure)       | Arthrodesis of upper extremity  |
| 27703     | Arthroplasty, ankle; revision, total ankle                                                                                             | Arthroplasty of ankle           |
| 27700     | Arthroplasty, ankle;                                                                                                                   | Arthroplasty of ankle           |
| 27702     | Arthroplasty, ankle; with implant (total ankle)                                                                                        | Arthroplasty of ankle           |
| 24362     | Arthroplasty, elbow; with implant and fascia lata ligament reconstruction                                                              | Arthroplasty of elbow           |
| 24366     | Arthroplasty, radial head; with implant                                                                                                | Arthroplasty of elbow           |
| 24361     | Arthroplasty, elbow; with distal humeral prosthetic replacement                                                                        | Arthroplasty of elbow           |
| 24363     | Arthroplasty, elbow; with distal humerus and proximal ulnar prosthetic replacement (eg, total elbow)                                   | Arthroplasty of elbow           |
| 24360     | Arthroplasty, elbow; with membrane (eg, fascial)                                                                                       | Arthroplasty of elbow           |
| 24365     | Arthroplasty, radial head;                                                                                                             | Arthroplasty of elbow           |
| 26536     | Arthroplasty, interphalangeal joint; with prosthetic implant, each joint                                                               | Arthroplasty of forearm or hand |
| 26531     | Arthroplasty, metacarpophalangeal joint; with prosthetic implant, each joint                                                           | Arthroplasty of forearm or hand |
| 26535     | Arthroplasty, interphalangeal joint; each joint                                                                                        | Arthroplasty of forearm or hand |
| 26530     | Arthroplasty, metacarpophalangeal joint; each joint                                                                                    | Arthroplasty of forearm or hand |
| 25447     | Arthroplasty, interposition, intercarpal or carpometacarpal joints                                                                     | Arthroplasty of forearm or hand |
| 25446     | Arthroplasty with prosthetic replacement; distal radius and partial or entire carpus (total wrist)                                     | Arthroplasty of forearm or hand |
| 25443     | Arthroplasty with prosthetic replacement; scaphoid carpal (navicular)                                                                  | Arthroplasty of forearm or hand |
| 25444     | Arthroplasty with prosthetic replacement; lunate                                                                                       | Arthroplasty of forearm or hand |
| 25441     | Arthroplasty with prosthetic replacement; distal radius                                                                                | Arthroplasty of forearm or hand |
| 25332     | Arthroplasty, wrist, with or without interposition, with or without external or internal fixation                                      | Arthroplasty of forearm or hand |
| 25442     | Arthroplasty with prosthetic replacement; distal ulna                                                                                  | Arthroplasty of forearm or hand |
| 25445     | Arthroplasty with prosthetic replacement; trapezium                                                                                    | Arthroplasty of forearm or hand |
| 27132     | Conversion of previous hip surgery to total hip arthroplasty, with or without autograft or allograft                                   | Arthroplasty of hip             |
| 27137     | Revision of total hip arthroplasty; acetabular component only, with or without autograft or allograft                                  | Arthroplasty of hip             |
| 27138     | Revision of total hip arthroplasty; femoral component only, with or without allograft                                                  | Arthroplasty of hip             |
| 27130     | Arthroplasty, acetabular and proximal femoral prosthetic replacement (total hip arthroplasty), with or without autograft or allograft  | Arthroplasty of hip             |
| 27134     | Revision of total hip arthroplasty; both components, with or without autograft or allograft                                            | Arthroplasty of hip             |
| 27125     | Hemiarthroplasty, hip, partial (eg, femoral stem prosthesis, bipolar arthroplasty)                                                     | Arthroplasty of hip             |
| 27445     | Arthroplasty, knee, hinge prosthesis (eg, Walldius type)                                                                               | Arthroplasty of knee            |
| 27446     | Arthroplasty, knee, condyle and plateau; medial OR lateral compartment                                                                 | Arthroplasty of knee            |
| 27447     | Arthroplasty, knee, condyle and plateau; medial AND lateral compartments with or without patella resurfacing (total knee arthroplasty) | Arthroplasty of knee            |
| 27486     | Revision of total knee arthroplasty, with or without allograft; 1 component                                                            | Arthroplasty of knee            |
| 27442     | Arthroplasty, femoral condyles or tibial plateau(s), knee;                                                                             | Arthroplasty of knee            |
| 27438     | Arthroplasty, patella; with prosthesis                                                                                                 | Arthroplasty of knee            |
| 27440     | Arthroplasty, knee, tibial plateau;                                                                                                    | Arthroplasty of knee            |
| 27441     | Arthroplasty, knee, tibial plateau; with debridement and partial synovectomy                                                           | Arthroplasty of knee            |
| 27437     | Arthroplasty, patella; without prosthesis                                                                                              | Arthroplasty of knee            |

| Continued |                                                                                                                                                                                                                                       |                                         |
|-----------|---------------------------------------------------------------------------------------------------------------------------------------------------------------------------------------------------------------------------------------|-----------------------------------------|
| Code      | Code description                                                                                                                                                                                                                      | Procedure type                          |
| 27487     | Revision of total knee arthroplasty, with or without allograft; femoral and entire tibial component                                                                                                                                   | Arthroplasty of knee                    |
| 27443     | Arthroplasty, femoral condyles or tibial plateau(s), knee; with debridement and partial synovectomy                                                                                                                                   | Arthroplasty of knee                    |
| 23470     | Arthroplasty, glenohumeral joint; hemiarthroplasty                                                                                                                                                                                    | Arthroplasty of shoulder                |
| 23472     | Arthroplasty, glenohumeral joint; total shoulder (glenoid and proximal humeral replacement [eg, total shoulder])                                                                                                                      | Arthroplasty of shoulder                |
| 22862     | Revision including replacement of total disc arthroplasty (artificial disc), anterior approach, single interspace; lumbar                                                                                                             | Arthroplasty of spine                   |
| 22857     | Total disc arthroplasty (artificial disc), anterior approach, including discectomy to prepare interspace (other than for decompression), single interspace, lumbar                                                                    | Arthroplasty of spine                   |
| 22861     | Revision including replacement of total disc arthroplasty (artificial disc), anterior approach, single interspace; cervical                                                                                                           | Arthroplasty of spine                   |
| 22856     | Total disc arthroplasty (artificial disc), anterior approach, including discectomy with end plate preparation (includes osteophylectomy for nerve root or spinal cord decompression and microdissection), single interspace, cervical | Arthroplasty of spine                   |
| 21240     | Arthroplasty, temporomandibular joint, with or without autograft (includes obtaining graft)                                                                                                                                           | Arthroplasty of temporomandibular joint |
| 21243     | Arthroplasty, temporomandibular joint, with prosthetic joint replacement                                                                                                                                                              | Arthroplasty of temporomandibular joint |
| 21242     | Arthroplasty, temporomandibular joint, with allograft                                                                                                                                                                                 | Arthroplasty of temporomandibular joint |
| 29891     | Arthroscopy, ankle, surgical, excision of osteochondral defect of talus and/or tibia, including drilling of the defect                                                                                                                | Arthroscopy of ankle or foot            |
| 29899     | Arthroscopy, ankle (tibiotalar and fibulotalar joints), surgical; with ankle arthrodesis                                                                                                                                              | Arthroscopy of ankle or foot            |
| 29898     | Arthroscopy, ankle (tibiotalar and fibulotalar joints), surgical; debridement, extensive                                                                                                                                              | Arthroscopy of ankle or foot            |
| 29895     | Arthroscopy, ankle (tibiotalar and fibulotalar joints), surgical; synovectomy, partial                                                                                                                                                | Arthroscopy of ankle or foot            |
| 29892     | Arthroscopically aided repair of large osteochondritis dissecans lesion, talar dome fracture, or tibial plafond fracture, with or without internal fixation (includes arthroscopy)                                                    | Arthroscopy of ankle or foot            |
| 29894     | Arthroscopy, ankle (tibiotalar and fibulotalar joints), surgical; with removal of loose body or foreign body                                                                                                                          | Arthroscopy of ankle or foot            |
| 29897     | Arthroscopy, ankle (tibiotalar and fibulotalar joints), surgical; debridement, limited                                                                                                                                                | Arthroscopy of ankle or foot            |
| 29907     | Arthroscopy, subtalar joint, surgical; with subtalar arthrodesis                                                                                                                                                                      | Arthroscopy of ankle or foot            |
| 29906     | Arthroscopy, subtalar joint, surgical; with debridement                                                                                                                                                                               | Arthroscopy of ankle or foot            |
| 29905     | Arthroscopy, subtalar joint, surgical; with synovectomy                                                                                                                                                                               | Arthroscopy of ankle or foot            |
| 29904     | Arthroscopy, subtalar joint, surgical; with removal of loose body or foreign body                                                                                                                                                     | Arthroscopy of ankle or foot            |
| 29835     | Arthroscopy, elbow, surgical; synovectomy, partial                                                                                                                                                                                    | Arthroscopy of elbow                    |
| 29838     | Arthroscopy, elbow, surgical; debridement, extensive                                                                                                                                                                                  | Arthroscopy of elbow                    |
| 29837     | Arthroscopy, elbow, surgical; debridement, limited                                                                                                                                                                                    | Arthroscopy of elbow                    |
| 29834     | Arthroscopy, elbow, surgical; with removal of loose body or foreign body                                                                                                                                                              | Arthroscopy of elbow                    |
| 29836     | Arthroscopy, elbow, surgical; synovectomy, complete                                                                                                                                                                                   | Arthroscopy of elbow                    |
| 29901     | Arthroscopy, metacarpophalangeal joint, surgical; with debridement                                                                                                                                                                    | Arthroscopy of hand                     |
| 29902     | Arthroscopy, metacarpophalangeal joint, surgical; with reduction of displaced ulnar collateral ligament (eg, Stenar lesion)                                                                                                           | Arthroscopy of hand                     |
| 29914     | Arthroscopy, hip, surgical; with femoroplasty (ie, treatment of cam lesion)                                                                                                                                                           | Arthroscopy of hip                      |
| 29916     | Arthroscopy, hip, surgical; with labral repair                                                                                                                                                                                        | Arthroscopy of hip                      |
| 29915     | Arthroscopy, hip, surgical; with acetabuloplasty (ie, treatment of pincer lesion)                                                                                                                                                     | Arthroscopy of hip                      |
| 29863     | Arthroscopy, hip, surgical; with synovectomy                                                                                                                                                                                          | Arthroscopy of hip                      |
| 29862     | Arthroscopy, hip, surgical; with debridement/shaving of articular cartilage (chondroplasty), abrasion arthroplasty, and/or resection of labrum                                                                                        | Arthroscopy of hip                      |
| 29861     | Arthroscopy, hip, surgical; with removal of loose body or foreign body                                                                                                                                                                | Arthroscopy of hip                      |
| 29889     | Arthroscopically aided posterior cruciate ligament repair/augmentation or reconstruction                                                                                                                                              | Arthroscopy of knee                     |
| 29887     | Arthroscopy, knee, surgical; drilling for intact osteochondritis dissecans lesion with internal fixation                                                                                                                              | Arthroscopy of knee                     |
| 29855     | Arthroscopically aided treatment of tibial fracture, proximal (plateau); unicondylar; includes internal fixation, when performed (includes arthroscopy)                                                                               | Arthroscopy of knee                     |
| 29882     | Arthroscopy, knee, surgical; with meniscus repair (medial OR lateral)                                                                                                                                                                 | Arthroscopy of knee                     |
| 29883     | Arthroscopy, knee, surgical; with meniscus repair (medial AND lateral)                                                                                                                                                                | Arthroscopy of knee                     |

| Continued |                                                                                                                                                                                                                           |                               |
|-----------|---------------------------------------------------------------------------------------------------------------------------------------------------------------------------------------------------------------------------|-------------------------------|
| Code      | Code description                                                                                                                                                                                                          | Procedure type                |
| 29885     | Arthroscopy, knee, surgical; drilling for osteochondritis dissecans with bone grafting, with or without internal fixation (including debridement of base of lesion)                                                       | Arthroscopy of knee           |
| 29888     | Arthroscopically aided anterior cruciate ligament repair/augmentation or reconstruction                                                                                                                                   | Arthroscopy of knee           |
| 29868     | Arthroscopy, knee, surgical; meniscal transplantation (includes arthrotomy for meniscal insertion), medial or lateral                                                                                                     | Arthroscopy of knee           |
| 29873     | Arthroscopy, knee, surgical; with lateral release                                                                                                                                                                         | Arthroscopy of knee           |
| 29856     | Arthroscopically aided treatment of tibial fracture, proximal (plateau); bicondylar, includes internal fixation, when performed (includes arthroscopy)                                                                    | Arthroscopy of knee           |
| 29867     | Arthroscopy, knee, surgical; osteochondral allograft (eg, mosaicplasty)                                                                                                                                                   | Arthroscopy of knee           |
| 29851     | Arthroscopically aided treatment of intercondylar spine(s) and/or tuberosity fracture(s) of the knee, with or without manipulation; with internal or external fixation (includes arthroscopy)                             | Arthroscopy of knee           |
| 29886     | Arthroscopy, knee, surgical; drilling for intact osteochondritis dissecans lesion                                                                                                                                         | Arthroscopy of knee           |
| 29884     | Arthroscopy, knee, surgical; with lysis of adhesions, with or without manipulation (separate procedure)                                                                                                                   | Arthroscopy of knee           |
| 29877     | Arthroscopy, knee, surgical; debridement/shaving of articular cartilage (chondroplasty)                                                                                                                                   | Arthroscopy of knee           |
| 29880     | Arthroscopy, knee, surgical; with meniscectomy (medial AND lateral, including any meniscal shaving) including debridement/shaving of articular cartilage (chondroplasty), same or separate compartment(s), when performed | Arthroscopy of knee           |
| 29879     | Arthroscopy, knee, surgical; abrasion arthroplasty (includes chondroplasty where necessary) or multiple drilling or microfracture                                                                                         | Arthroscopy of knee           |
| 29874     | Arthroscopy, knee, surgical; for removal of loose body or foreign body (eg, osteochondritis dissecans fragmentation, chondral fragmentation)                                                                              | Arthroscopy of knee           |
| 29875     | Arthroscopy, knee, surgical; synovectomy, limited (eg, plica or shelf resection) (separate procedure)                                                                                                                     | Arthroscopy of knee           |
| 29876     | Arthroscopy, knee, surgical; synovectomy, major, 2 or more compartments (eg, medial or lateral)                                                                                                                           | Arthroscopy of knee           |
| 29866     | Arthroscopy, knee, surgical; osteochondral autograft(s) (eg, mosaicplasty) (includes harvesting of the autograft[s])                                                                                                      | Arthroscopy of knee           |
| 29881     | Arthroscopy, knee, surgical; with meniscectomy (medial OR lateral, including any meniscal shaving) including debridement/shaving of articular cartilage (chondroplasty), same or separate compartment(s), when performed  | Arthroscopy of knee           |
| 29828     | Arthroscopy, shoulder, surgical; biceps tenodesis                                                                                                                                                                         | Arthroscopy of shoulder       |
| 29827     | Arthroscopy, shoulder, surgical; with rotator cuff repair                                                                                                                                                                 | Arthroscopy of shoulder       |
| 29807     | Arthroscopy, shoulder, surgical; repair of SLAP lesion                                                                                                                                                                    | Arthroscopy of shoulder       |
| 29824     | Arthroscopy, shoulder, surgical; distal claviclectomy including distal articular surface (Mumford procedure)                                                                                                              | Arthroscopy of shoulder       |
| 29806     | Arthroscopy, shoulder, surgical; capsulorrhaphy                                                                                                                                                                           | Arthroscopy of shoulder       |
| 29825     | Arthroscopy, shoulder, surgical; with lysis and resection of adhesions, with or without manipulation                                                                                                                      | Arthroscopy of shoulder       |
| 29822     | Arthroscopy, shoulder, surgical; debridement, limited                                                                                                                                                                     | Arthroscopy of shoulder       |
| 29819     | Arthroscopy, shoulder, surgical; with removal of loose body or foreign body                                                                                                                                               | Arthroscopy of shoulder       |
| 29820     | Arthroscopy, shoulder, surgical; synovectomy, partial                                                                                                                                                                     | Arthroscopy of shoulder       |
| 29821     | Arthroscopy, shoulder, surgical; synovectomy, complete                                                                                                                                                                    | Arthroscopy of shoulder       |
| 29823     | Arthroscopy, shoulder, surgical; debridement, extensive                                                                                                                                                                   | Arthroscopy of shoulder       |
| 29847     | Arthroscopy, wrist, surgical; internal fixation for fracture or instability                                                                                                                                               | Arthroscopy of wrist          |
| 29846     | Arthroscopy, wrist, surgical; excision and/or repair of triangular fibrocartilage and/or joint debridement                                                                                                                | Arthroscopy of wrist          |
| 29844     | Arthroscopy, wrist, surgical; synovectomy, partial                                                                                                                                                                        | Arthroscopy of wrist          |
| 29845     | Arthroscopy, wrist, surgical; synovectomy, complete                                                                                                                                                                       | Arthroscopy of wrist          |
| 27054     | Arthrotomy with synovectomy, hip joint                                                                                                                                                                                    | Arthrotomy of lower extremity |
| 27033     | Arthrotomy, hip, including exploration or removal of loose or foreign body                                                                                                                                                | Arthrotomy of lower extremity |
| 27030     | Arthrotomy, hip, with drainage (eg, infection)                                                                                                                                                                            | Arthrotomy of lower extremity |
| 27403     | Arthrotomy with meniscus repair, knee                                                                                                                                                                                     | Arthrotomy of lower extremity |
| 27612     | Arthrotomy, posterior capsular release, ankle, with or without Achilles tendon lengthening                                                                                                                                | Arthrotomy of lower extremity |
| 27626     | Arthrotomy, with synovectomy, ankle; including tenosynovectomy                                                                                                                                                            | Arthrotomy of lower extremity |
| 27620     | Arthrotomy, ankle, with joint exploration, with or without biopsy, with or without removal of loose or foreign body                                                                                                       | Arthrotomy of lower extremity |

| Continued |                                                                                                                                                                                                                                                    |                                                                                       |
|-----------|----------------------------------------------------------------------------------------------------------------------------------------------------------------------------------------------------------------------------------------------------|---------------------------------------------------------------------------------------|
| Code      | Code description                                                                                                                                                                                                                                   | Procedure type                                                                        |
| 27625     | Arthrotomy, with synovectomy, ankle;                                                                                                                                                                                                               | Arthrotomy of lower extremity                                                         |
| 27610     | Arthrotomy, ankle, including exploration, drainage, or removal of foreign body                                                                                                                                                                     | Arthrotomy of lower extremity                                                         |
| 28024     | Arthrotomy, including exploration, drainage, or removal of loose or foreign body; interphalangeal joint                                                                                                                                            | Arthrotomy of lower extremity                                                         |
| 28020     | Arthrotomy, including exploration, drainage, or removal of loose or foreign body; intertarsal or tarsometatarsal joint                                                                                                                             | Arthrotomy of lower extremity                                                         |
| 28022     | Arthrotomy, including exploration, drainage, or removal of loose or foreign body; metatarsophalangeal joint                                                                                                                                        | Arthrotomy of lower extremity                                                         |
| 27335     | Arthrotomy, with synovectomy, knee; anterior AND posterior including popliteal area                                                                                                                                                                | Arthrotomy of lower extremity                                                         |
| 27333     | Arthrotomy, with excision of semilunar cartilage (meniscectomy) knee; medial AND lateral                                                                                                                                                           | Arthrotomy of lower extremity                                                         |
| 27310     | Arthrotomy, knee, with exploration, drainage, or removal of foreign body (eg, infection)                                                                                                                                                           | Arthrotomy of lower extremity                                                         |
| 27334     | Arthrotomy, with synovectomy, knee; anterior OR posterior                                                                                                                                                                                          | Arthrotomy of lower extremity                                                         |
| 27331     | Arthrotomy, knee; including joint exploration, biopsy, or removal of loose or foreign bodies                                                                                                                                                       | Arthrotomy of lower extremity                                                         |
| 27332     | Arthrotomy, with excision of semilunar cartilage (meniscectomy) knee; medial OR lateral                                                                                                                                                            | Arthrotomy of lower extremity                                                         |
| 21010     | Arthrotomy, temporomandibular joint                                                                                                                                                                                                                | Arthrotomy of temporomandibular joint                                                 |
| 25107     | Arthrotomy, distal radioulnar joint including repair of triangular cartilage, complex                                                                                                                                                              | Arthrotomy of upper extremity                                                         |
| 24006     | Arthrotomy of the elbow, with capsular excision for capsular release (separate procedure)                                                                                                                                                          | Arthrotomy of upper extremity                                                         |
| 24102     | Arthrotomy, elbow; with synovectomy                                                                                                                                                                                                                | Arthrotomy of upper extremity                                                         |
| 24101     | Arthrotomy, elbow; with joint exploration, with or without biopsy, with or without removal of loose or foreign body                                                                                                                                | Arthrotomy of upper extremity                                                         |
| 24000     | Arthrotomy, elbow, including exploration, drainage, or removal of foreign body                                                                                                                                                                     | Arthrotomy of upper extremity                                                         |
| 26075     | Arthrotomy, with exploration, drainage, or removal of loose or foreign body; metacarpophalangeal joint, each                                                                                                                                       | Arthrotomy of upper extremity                                                         |
| 26080     | Arthrotomy, with exploration, drainage, or removal of loose or foreign body; interphalangeal joint, each                                                                                                                                           | Arthrotomy of upper extremity                                                         |
| 26070     | Arthrotomy, with exploration, drainage, or removal of loose or foreign body; carpometacarpal joint                                                                                                                                                 | Arthrotomy of upper extremity                                                         |
| 23040     | Arthrotomy, glenohumeral joint, including exploration, drainage, or removal of foreign body                                                                                                                                                        | Arthrotomy of upper extremity                                                         |
| 23107     | Arthrotomy, glenohumeral joint, with joint exploration, with or without removal of loose or foreign body                                                                                                                                           | Arthrotomy of upper extremity                                                         |
| 23105     | Arthrotomy; glenohumeral joint, with synovectomy, with or without biopsy                                                                                                                                                                           | Arthrotomy of upper extremity                                                         |
| 23101     | Arthrotomy, acromioclavicular joint or sternoclavicular joint, including biopsy and/or excision of torn cartilage                                                                                                                                  | Arthrotomy of upper extremity                                                         |
| 23106     | Arthrotomy; sternoclavicular joint, with synovectomy, with or without biopsy                                                                                                                                                                       | Arthrotomy of upper extremity                                                         |
| 23044     | Arthrotomy, acromioclavicular, sternoclavicular joint, including exploration, drainage, or removal of foreign body                                                                                                                                 | Arthrotomy of upper extremity                                                         |
| 25105     | Arthrotomy, wrist joint; with synovectomy                                                                                                                                                                                                          | Arthrotomy of upper extremity                                                         |
| 25040     | Arthrotomy, radiocarpal or midcarpal joint, with exploration, drainage, or removal of foreign body                                                                                                                                                 | Arthrotomy of upper extremity                                                         |
| 25101     | Arthrotomy, wrist joint; with joint exploration, with or without biopsy, with or without removal of loose or foreign body                                                                                                                          | Arthrotomy of upper extremity                                                         |
| 67015     | Aspiration or release of vitreous, subretinal or choroidal fluid, pars plana approach (posterior sclerotomy)                                                                                                                                       | Aspiration or release of vitreous, subretinal or choroidal fluid, pars plana approach |
| 92993     | Atrial septectomy or septostomy; blade method (Park septostomy) (includes cardiac catheterization)                                                                                                                                                 | Atrial septectomy or septostomy                                                       |
| 33735     | Atrial septectomy or septostomy; closed heart (Blalock-Hanlon type operation)                                                                                                                                                                      | Atrial septectomy or septostomy                                                       |
| 33736     | Atrial septectomy or septostomy; open heart with cardiopulmonary bypass                                                                                                                                                                            | Atrial septectomy or septostomy                                                       |
| 33737     | Atrial septectomy or septostomy; open heart, with inflow occlusion                                                                                                                                                                                 | Atrial septectomy or septostomy                                                       |
| 92992     | Atrial septectomy or septostomy; transvenous method, balloon (eg, Rashkind type) (includes cardiac catheterization)                                                                                                                                | Atrial septectomy or septostomy                                                       |
| 33741     | Transcatheter atrial septostomy (TAS) for congenital cardiac anomalies to create effective atrial flow, including all imaging guidance by the proceduralist, when performed, any method (eg, Rashkind, Sang-Park, balloon, cutting balloon, blade) | Atrial septectomy or septostomy                                                       |
| 21127     | Augmentation, mandibular body or angle; with bone graft, onlay or interpositional (includes obtaining autograft)                                                                                                                                   | Augmentation of mandibular body or angle                                              |
| 21125     | Augmentation, mandibular body or angle; prosthetic material                                                                                                                                                                                        | Augmentation of mandibular body or angle                                              |

| Continued |                                                                                                                                                                                                                       |                                           |
|-----------|-----------------------------------------------------------------------------------------------------------------------------------------------------------------------------------------------------------------------|-------------------------------------------|
| Code      | Code description                                                                                                                                                                                                      | Procedure type                            |
| 27412     | Autologous chondrocyte implantation, knee                                                                                                                                                                             | Autologous chondrocyte implantation, knee |
| 33690     | Banding of pulmonary artery                                                                                                                                                                                           | Banding of pulmonary artery               |
| 23430     | Tenodesis of long tendon of biceps                                                                                                                                                                                    | Biceps tenodesis or reconstruction        |
| 24340     | Tenodesis of biceps tendon at elbow (separate procedure)                                                                                                                                                              | Biceps tenodesis or reconstruction        |
| 24342     | Reinsertion of ruptured biceps or triceps tendon, distal, with or without tendon graft                                                                                                                                | Biceps tenodesis or reconstruction        |
| 47570     | Laparoscopy, surgical; cholecystoenterostomy                                                                                                                                                                          | Biliary reconstruction - laparoscopic     |
| 64870     | Anastomosis; facial-phrenic                                                                                                                                                                                           | Biliary reconstruction - open             |
| 64868     | Anastomosis; facial-hypoglossal                                                                                                                                                                                       | Biliary reconstruction - open             |
| 47785     | Anastomosis, Roux-en-Y, of intrahepatic biliary ducts and gastrointestinal tract                                                                                                                                      | Biliary reconstruction - open             |
| 47780     | Anastomosis, Roux-en-Y, of extrahepatic biliary ducts and gastrointestinal tract                                                                                                                                      | Biliary reconstruction - open             |
| 47765     | Anastomosis, of intrahepatic ducts and gastrointestinal tract                                                                                                                                                         | Biliary reconstruction - open             |
| 47760     | Anastomosis, of extrahepatic biliary ducts and gastrointestinal tract                                                                                                                                                 | Biliary reconstruction - open             |
| 47741     | Cholecystoenterostomy; Roux-en-Y with gastroenterostomy                                                                                                                                                               | Biliary reconstruction - open             |
| 47740     | Cholecystoenterostomy; Roux-en-Y                                                                                                                                                                                      | Biliary reconstruction - open             |
| 47721     | Cholecystoenterostomy; with gastroenterostomy                                                                                                                                                                         | Biliary reconstruction - open             |
| 47425     | Choledochotomy or choledochostomy with exploration, drainage, or removal of calculus, with or without cholecystotomy; with transduodenal sphincterotomy or sphincteroplasty                                           | Biliary reconstruction - open             |
| 47420     | Choledochotomy or choledochostomy with exploration, drainage, or removal of calculus, with or without cholecystotomy; without transduodenal sphincterotomy or sphincteroplasty                                        | Biliary reconstruction - open             |
| 47720     | Cholecystoenterostomy; direct                                                                                                                                                                                         | Biliary reconstruction - open             |
| 38525     | Biopsy or excision of lymph node(s); open, deep axillary node(s)                                                                                                                                                      | Biopsy or excision of lymph node(s)       |
| 38520     | Biopsy or excision of lymph node(s); open, deep cervical node(s) with excision scalene fat pad                                                                                                                        | Biopsy or excision of lymph node(s)       |
| 38510     | Biopsy or excision of lymph node(s); open, deep cervical node(s)                                                                                                                                                      | Biopsy or excision of lymph node(s)       |
| 38531     | Biopsy or excision of lymph node(s); open, inguinofemoral node(s)                                                                                                                                                     | Biopsy or excision of lymph node(s)       |
| 20934     | Allograft, includes templating, cutting, placement and internal fixation, when performed; intercalary, complete (ie, cylindrical) (List separately in addition to code for primary procedure)                         | Bone graft procedure                      |
| 20932     | Allograft, includes templating, cutting, placement and internal fixation, when performed; osteoarticular, including articular surface and contiguous bone (List separately in addition to code for primary procedure) | Bone graft procedure                      |
| 20902     | Bone graft, any donor area; major or large                                                                                                                                                                            | Bone graft procedure                      |
| 20900     | Bone graft, any donor area; minor or small (eg, dowel or button)                                                                                                                                                      | Bone graft procedure                      |
| 27170     | Bone graft, femoral head, neck, intertrochanteric or subtrochanteric area (includes obtaining bone graft)                                                                                                             | Bone graft procedure                      |
| 20933     | Allograft, includes templating, cutting, placement and internal fixation, when performed; hemicortical intercalary, partial (ie, hemicylindrical) (List separately in addition to code for primary procedure)         | Bone graft procedure                      |
| 25426     | Repair of defect with autograft; radius AND ulna                                                                                                                                                                      | Bone graft procedure                      |
| 25425     | Repair of defect with autograft; radius OR ulna                                                                                                                                                                       | Bone graft procedure                      |
| 23182     | Partial excision (craterization, saucerization, or diaphysectomy) bone (eg, osteomyelitis), scapula                                                                                                                   | Bone resection                            |
| 23180     | Partial excision (craterization, saucerization, or diaphysectomy) bone (eg, osteomyelitis), clavicle                                                                                                                  | Bone resection                            |
| 27070     | Partial excision, wing of ilium, symphysis pubis, or greater trochanter of femur, (craterization, saucerization) (eg, osteomyelitis or bone abscess); superficial                                                     | Bone resection                            |
| 28122     | Partial excision (craterization, saucerization, sequestrectomy, or diaphysectomy) bone (eg, osteomyelitis or bossing); tarsal or metatarsal bone, except talus or calcaneus                                           | Bone resection                            |
| 28124     | Partial excision (craterization, saucerization, sequestrectomy, or diaphysectomy) bone (eg, osteomyelitis or bossing); phalanx of toe                                                                                 | Bone resection                            |
| 28120     | Partial excision (craterization, saucerization, sequestrectomy, or diaphysectomy) bone (eg, osteomyelitis or bossing); talus or calcaneus                                                                             | Bone resection                            |
| 27360     | Partial excision (craterization, saucerization, or diaphysectomy) bone, femur, proximal tibia and/or fibula (eg, osteomyelitis or bone abscess)                                                                       | Bone resection                            |
| 27641     | Partial excision (craterization, saucerization, or diaphysectomy), bone (eg, osteomyelitis); fibula                                                                                                                   | Bone resection                            |
| 27640     | Partial excision (craterization, saucerization, or diaphysectomy), bone (eg, osteomyelitis); tibia                                                                                                                    | Bone resection                            |

| Continued |                                                                                                                                                                                          |                          |
|-----------|------------------------------------------------------------------------------------------------------------------------------------------------------------------------------------------|--------------------------|
| Code      | Code description                                                                                                                                                                         | Procedure type           |
| 26236     | Partial excision (craterization, saucerization, or diaphysectomy) bone (eg, osteomyelitis); distal phalanx of finger                                                                     | Bone resection           |
| 26235     | Partial excision (craterization, saucerization, or diaphysectomy) bone (eg, osteomyelitis); proximal or middle phalanx of finger                                                         | Bone resection           |
| 27071     | Partial excision, wing of ilium, symphysis pubis, or greater trochanter of femur, (craterization, saucerization) (eg, osteomyelitis or bone abscess); deep (subfascial or intramuscular) | Bone resection           |
| 26230     | Partial excision (craterization, saucerization, or diaphysectomy) bone (eg, osteomyelitis); metacarpal                                                                                   | Bone resection           |
| 25151     | Partial excision (craterization, saucerization, or diaphysectomy) of bone (eg, for osteomyelitis); radius                                                                                | Bone resection           |
| 25150     | Partial excision (craterization, saucerization, or diaphysectomy) of bone (eg, for osteomyelitis); ulna                                                                                  | Bone resection           |
| 24147     | Partial excision (craterization, saucerization, or diaphysectomy) bone (eg, osteomyelitis), olecranon process                                                                            | Bone resection           |
| 24145     | Partial excision (craterization, saucerization, or diaphysectomy) bone (eg, osteomyelitis), radial head or neck                                                                          | Bone resection           |
| 24140     | Partial excision (craterization, saucerization, or diaphysectomy) bone (eg, osteomyelitis), humerus                                                                                      | Bone resection           |
| 23184     | Partial excision (craterization, saucerization, or diaphysectomy) bone (eg, osteomyelitis), proximal humerus                                                                             | Bone resection           |
| 19340     | Immediate insertion of breast prosthesis following mastopexy, mastectomy or in reconstruction                                                                                            | Breast implant           |
| 19342     | Delayed insertion of breast prosthesis following mastopexy, mastectomy or in reconstruction                                                                                              | Breast implant           |
| 19368     | Breast reconstruction with transverse rectus abdominis myocutaneous flap (TRAM), single pedicle, including closure of donor site; with microvascular anastomosis (supercharging)         | Breast reconstruction    |
| 19364     | Breast reconstruction with free flap                                                                                                                                                     | Breast reconstruction    |
| 19357     | Breast reconstruction, immediate or delayed, with tissue expander, including subsequent expansion                                                                                        | Breast reconstruction    |
| 19366     | Breast reconstruction with other technique                                                                                                                                               | Breast reconstruction    |
| 19369     | Breast reconstruction with transverse rectus abdominis myocutaneous flap (TRAM), double pedicle, including closure of donor site                                                         | Breast reconstruction    |
| 19361     | Breast reconstruction with latissimus dorsi flap, without prosthetic implant                                                                                                             | Breast reconstruction    |
| 19367     | Breast reconstruction with transverse rectus abdominis myocutaneous flap (TRAM), single pedicle, including closure of donor site;                                                        | Breast reconstruction    |
| 31775     | Bronchoplasty; excision stenosis and anastomosis                                                                                                                                         | Bronchoplasty            |
| 31770     | Bronchoplasty; graft repair                                                                                                                                                              | Bronchoplasty            |
| 61154     | Burr hole(s) with evacuation and/or drainage of hematoma, extradural or subdural                                                                                                         | Burr hole(s) or trephine |
| 61253     | Burr hole(s) or trephine, infratentorial, unilateral or bilateral                                                                                                                        | Burr hole(s) or trephine |
| 61210     | Burr hole(s); for implanting ventricular catheter, reservoir, EEG electrode(s), pressure recording device, or other cerebral monitoring device (separate procedure)                      | Burr hole(s) or trephine |
| 61156     | Burr hole(s); with aspiration of hematoma or cyst, intracerebral                                                                                                                         | Burr hole(s) or trephine |
| 61250     | Burr hole(s) or trephine, supratentorial, exploratory, not followed by other surgery                                                                                                     | Burr hole(s) or trephine |
| 61151     | Burr hole(s) or trephine; with subsequent tapping (aspiration) of intracranial abscess or cyst                                                                                           | Burr hole(s) or trephine |
| 61150     | Burr hole(s) or trephine; with drainage of brain abscess or cyst                                                                                                                         | Burr hole(s) or trephine |
| 61140     | Burr hole(s) or trephine; with biopsy of brain or intracranial lesion                                                                                                                    | Burr hole(s) or trephine |
| 61120     | Burr hole(s) for ventricular puncture (including injection of gas, contrast media, dye, or radioactive material)                                                                         | Burr hole(s) or trephine |
| 35531     | Bypass graft, with vein; aortoceliac or aortomesenteric                                                                                                                                  | Bypass graft             |
| 35623     | Bypass graft, with other than vein; axillary-popliteal or -tibial                                                                                                                        | Bypass graft             |
| 35666     | Bypass graft, with other than vein; femoral-anterior tibial, posterior tibial, or peroneal artery                                                                                        | Bypass graft             |
| 35671     | Bypass graft, with other than vein; popliteal-tibial or -peroneal artery                                                                                                                 | Bypass graft             |
| 35650     | Bypass graft, with other than vein; axillary-axillary                                                                                                                                    | Bypass graft             |
| 35626     | Bypass graft, with other than vein; aortosubclavian, aortoinnominate, or aortocarotid                                                                                                    | Bypass graft             |
| 35647     | Bypass graft, with other than vein; aortofemoral                                                                                                                                         | Bypass graft             |
| 35646     | Bypass graft, with other than vein; aortobifemoral                                                                                                                                       | Bypass graft             |
| 35638     | Bypass graft, with other than vein; aortobi-iliac                                                                                                                                        | Bypass graft             |

| Continued |                                                                                                                                                                                                                     |                                         |
|-----------|---------------------------------------------------------------------------------------------------------------------------------------------------------------------------------------------------------------------|-----------------------------------------|
| Code      | Code description                                                                                                                                                                                                    | Procedure type                          |
| 35637     | Bypass graft, with other than vein; aortoiliac                                                                                                                                                                      | Bypass graft                            |
| 35642     | Bypass graft, with other than vein; carotid-vertebral                                                                                                                                                               | Bypass graft                            |
| 33891     | Bypass graft, with other than vein, transcervical retropharyngeal carotid- carotid, performed in conjunction with endovascular repair of descending thoracic aorta, by neck incision                                | Bypass graft                            |
| 33889     | Open subclavian to carotid artery transposition performed in conjunction with endovascular repair of descending thoracic aorta, by neck incision, unilateral                                                        | Bypass graft                            |
| 35665     | Bypass graft, with other than vein; iliofemoral                                                                                                                                                                     | Bypass graft                            |
| 35663     | Bypass graft, with other than vein; ilioiliac                                                                                                                                                                       | Bypass graft                            |
| 35656     | Bypass graft, with other than vein; femoral-popliteal                                                                                                                                                               | Bypass graft                            |
| 35661     | Bypass graft, with other than vein; femoral-femoral                                                                                                                                                                 | Bypass graft                            |
| 35654     | Bypass graft, with other than vein; axillary-femoral-femoral                                                                                                                                                        | Bypass graft                            |
| 35633     | Bypass graft, with other than vein; ilio-mesenteric                                                                                                                                                                 | Bypass graft                            |
| 35632     | Bypass graft, with other than vein; ilio-celiac                                                                                                                                                                     | Bypass graft                            |
| 35631     | Bypass graft, with other than vein; aortoceliac, aortomesenteric, aortorenal                                                                                                                                        | Bypass graft                            |
| 35634     | Bypass graft, with other than vein; iliorenal                                                                                                                                                                       | Bypass graft                            |
| 35636     | Bypass graft, with other than vein; splenorenal (splenic to renal arterial anastomosis)                                                                                                                             | Bypass graft                            |
| 35645     | Bypass graft, with other than vein; subclavian-vertebral                                                                                                                                                            | Bypass graft                            |
| 33513     | Coronary artery bypass, vein only; 4 coronary venous grafts                                                                                                                                                         | CABG                                    |
| 33536     | Coronary artery bypass, using arterial graft(s); 4 or more coronary arterial grafts                                                                                                                                 | CABG                                    |
| 33534     | Coronary artery bypass, using arterial graft(s); 2 coronary arterial grafts                                                                                                                                         | CABG                                    |
| 33533     | Coronary artery bypass, using arterial graft(s); single arterial graft                                                                                                                                              | CABG                                    |
| 33516     | Coronary artery bypass, vein only; 6 or more coronary venous grafts                                                                                                                                                 | CABG                                    |
| 33514     | Coronary artery bypass, vein only; 5 coronary venous grafts                                                                                                                                                         | CABG                                    |
| 33512     | Coronary artery bypass, vein only; 3 coronary venous grafts                                                                                                                                                         | CABG                                    |
| 33511     | Coronary artery bypass, vein only; 2 coronary venous grafts                                                                                                                                                         | CABG                                    |
| 33510     | Coronary artery bypass, vein only; single coronary venous graft                                                                                                                                                     | CABG                                    |
| 33535     | Coronary artery bypass, using arterial graft(s); 3 coronary arterial grafts                                                                                                                                         | CABG                                    |
| 21282     | Lateral canthopexy                                                                                                                                                                                                  | Canthopexy                              |
| 21280     | Medial canthopexy (separate procedure)                                                                                                                                                                              | Canthopexy                              |
| 67950     | Canthoplasty (reconstruction of canthus)                                                                                                                                                                            | Canthoplasty                            |
| 26525     | Capsulectomy or capsulotomy; interphalangeal joint, each joint                                                                                                                                                      | Capsulectomy or capsulotomy, hand       |
| 26520     | Capsulectomy or capsulotomy; metacarpophalangeal joint, each joint                                                                                                                                                  | Capsulectomy or capsulotomy, hand       |
| 27036     | Capsulectomy or capsulotomy, hip, with or without excision of heterotopic bone, with release of hip flexor muscles (ie, gluteus medius, gluteus minimus, tensor fascia latae, rectus femoris, sartorius, iliopsoas) | Capsulectomy or capsulotomy, hip        |
| 26518     | Capsulodesis, metacarpophalangeal joint; 3 or 4 digits                                                                                                                                                              | Capsulodesis, metacarpophalangeal joint |
| 26516     | Capsulodesis, metacarpophalangeal joint; single digit                                                                                                                                                               | Capsulodesis, metacarpophalangeal joint |
| 26517     | Capsulodesis, metacarpophalangeal joint; 2 digits                                                                                                                                                                   | Capsulodesis, metacarpophalangeal joint |
| 25320     | Capsulorrhaphy or reconstruction, wrist - open (eg, capsulodesis, ligament repair, tendon transfer or graft) (includes synovectomy, capsulotomy and open reduction) for carpal instability                          | Capsulorrhaphy or reconstruction, wrist |
| 23466     | Capsulorrhaphy, glenohumeral joint, any type multi-directional instability                                                                                                                                          | Capsulorrhaphy, shoulder                |
| 23465     | Capsulorrhaphy, glenohumeral joint, posterior, with or without bone block                                                                                                                                           | Capsulorrhaphy, shoulder                |
| 23455     | Capsulorrhaphy, anterior; with labral repair (eg, Bankart procedure)                                                                                                                                                | Capsulorrhaphy, shoulder                |
| 23462     | Capsulorrhaphy, anterior, any type; with coracoid process transfer                                                                                                                                                  | Capsulorrhaphy, shoulder                |
| 23450     | Capsulorrhaphy, anterior; Putti-Platt procedure or Magnuson type operation                                                                                                                                          | Capsulorrhaphy, shoulder                |
| 23460     | Capsulorrhaphy, anterior, any type; with bone block                                                                                                                                                                 | Capsulorrhaphy, shoulder                |
| 28272     | Capsulotomy; interphalangeal joint, each joint (separate procedure)                                                                                                                                                 | Capsulotomy, foot and/or toes           |
| 28270     | Capsulotomy; metatarsophalangeal joint, with or without tenorrhaphy, each joint (separate procedure)                                                                                                                | Capsulotomy, foot and/or toes           |
| 28262     | Capsulotomy, midfoot; extensive, including posterior talotibial capsulotomy and tendon(s) lengthening (eg, resistant clubfoot deformity)                                                                            | Capsulotomy, foot and/or toes           |
| 28261     | Capsulotomy, midfoot; with tendon lengthening                                                                                                                                                                       | Capsulotomy, foot and/or toes           |
| 28264     | Capsulotomy, midtarsal (eg, Heyman type procedure)                                                                                                                                                                  | Capsulotomy, foot and/or toes           |

| Continued |                                                                                                                                                                                                                                                                                                                                                                                                                                                                                                                                                                                                                                                       |                                               |
|-----------|-------------------------------------------------------------------------------------------------------------------------------------------------------------------------------------------------------------------------------------------------------------------------------------------------------------------------------------------------------------------------------------------------------------------------------------------------------------------------------------------------------------------------------------------------------------------------------------------------------------------------------------------------------|-----------------------------------------------|
| Code      | Code description                                                                                                                                                                                                                                                                                                                                                                                                                                                                                                                                                                                                                                      | Procedure type                                |
| 28260     | Capsulotomy, midfoot; medial release only (separate procedure)                                                                                                                                                                                                                                                                                                                                                                                                                                                                                                                                                                                        | Capsulotomy, foot and/or toes                 |
| 27435     | Capsulotomy, posterior capsular release, knee                                                                                                                                                                                                                                                                                                                                                                                                                                                                                                                                                                                                         | Capsulotomy, posterior capsular release, knee |
| 25085     | Capsulotomy, wrist (eg, contracture)                                                                                                                                                                                                                                                                                                                                                                                                                                                                                                                                                                                                                  | Capsulotomy, wrist                            |
| 93650     | Intracardiac catheter ablation of atrioventricular node function, atrioventricular conduction for creation of complete heart block, with or without temporary pacemaker placement                                                                                                                                                                                                                                                                                                                                                                                                                                                                     | Cardiac ablation                              |
| 33999     | Unlisted procedure, cardiac surgery                                                                                                                                                                                                                                                                                                                                                                                                                                                                                                                                                                                                                   | Cardiac procedure, unlisted                   |
| 33310     | Cardiotomy, exploratory (includes removal of foreign body, atrial or ventricular thrombus); without bypass                                                                                                                                                                                                                                                                                                                                                                                                                                                                                                                                            | Cardiotomy, exploratory                       |
| 33315     | Cardiotomy, exploratory (includes removal of foreign body, atrial or ventricular thrombus); with cardiopulmonary bypass                                                                                                                                                                                                                                                                                                                                                                                                                                                                                                                               | Cardiotomy, exploratory                       |
| 31766     | Carinal reconstruction                                                                                                                                                                                                                                                                                                                                                                                                                                                                                                                                                                                                                                | Carinal reconstruction                        |
| 29848     | Endoscopy, wrist, surgical, with release of transverse carpal ligament                                                                                                                                                                                                                                                                                                                                                                                                                                                                                                                                                                                | Carpal tunnel release, endoscopic             |
| 25215     | Carpectomy; all bones of proximal row                                                                                                                                                                                                                                                                                                                                                                                                                                                                                                                                                                                                                 | Carpectomy                                    |
| 25210     | Carpectomy; 1 bone                                                                                                                                                                                                                                                                                                                                                                                                                                                                                                                                                                                                                                    | Carpectomy                                    |
| 20910     | Cartilage graft; costochondral                                                                                                                                                                                                                                                                                                                                                                                                                                                                                                                                                                                                                        | Cartilage graft                               |
| 66830     | Removal of secondary membranous cataract (opacified posterior lens capsule and/or anterior hyaloid) with corneo-scleral section, with or without iridectomy (iridocapsulotomy, iridocapsulectomy)                                                                                                                                                                                                                                                                                                                                                                                                                                                     | Cataract removal                              |
| 66991     | Extracapsular cataract removal with insertion of intraocular lens prosthesis (1 stage procedure), manual or mechanical technique (eg, irrigation and aspiration or phacoemulsification); with insertion of intraocular (eg, trabecular meshwork, supraciliary, suprachoroidal) anterior segment aqueous drainage device, without extraocular reservoir, internal approach, one or more                                                                                                                                                                                                                                                                | Cataract removal                              |
| 66988     | Extracapsular cataract removal with insertion of intraocular lens prosthesis (1 stage procedure), manual or mechanical technique (eg, irrigation and aspiration or phacoemulsification); with endoscopic cyclophotocoagulation                                                                                                                                                                                                                                                                                                                                                                                                                        | Cataract removal                              |
| 66984     | Extracapsular cataract removal with insertion of intraocular lens prosthesis (1 stage procedure), manual or mechanical technique (eg, irrigation and aspiration or phacoemulsification)                                                                                                                                                                                                                                                                                                                                                                                                                                                               | Cataract removal                              |
| 66983     | Intracapsular cataract extraction with insertion of intraocular lens prosthesis (1 stage procedure)                                                                                                                                                                                                                                                                                                                                                                                                                                                                                                                                                   | Cataract removal                              |
| 66987     | Extracapsular cataract removal with insertion of intraocular lens prosthesis (1-stage procedure), manual or mechanical technique (eg, irrigation and aspiration or phacoemulsification), complex, requiring devices or techniques not generally used in routine cataract surgery (eg, iris expansion device, suture support for intraocular lens, or primary posterior capsulorrhexis) or performed on patients in the amblyogenic developmental stage; with endoscopic cyclophotocoagulation                                                                                                                                                         | Cataract removal                              |
| 66989     | Extracapsular cataract removal with insertion of intraocular lens prosthesis (1-stage procedure), manual or mechanical technique (eg, irrigation and aspiration or phacoemulsification), complex, requiring devices or techniques not generally used in routine cataract surgery (eg, iris expansion device, suture support for intraocular lens, or primary posterior capsulorrhexis) or performed on patients in the amblyogenic developmental stage; with insertion of intraocular (eg, trabecular meshwork, supraciliary, suprachoroidal) anterior segment aqueous drainage device, without extraocular reservoir, internal approach, one or more | Cataract removal                              |
| 66982     | Extracapsular cataract removal with insertion of intraocular lens prosthesis (1-stage procedure), manual or mechanical technique (eg, irrigation and aspiration or phacoemulsification), complex, requiring devices or techniques not generally used in routine cataract surgery (eg, iris expansion device, suture support for intraocular lens, or primary posterior capsulorrhexis) or performed on patients in the amblyogenic developmental stage                                                                                                                                                                                                | Cataract removal                              |
| 25335     | Centralization of wrist on ulna (eg, radial club hand)                                                                                                                                                                                                                                                                                                                                                                                                                                                                                                                                                                                                | Centralization of wrist on ulna               |
| 59325     | Cerclage of cervix, during pregnancy; abdominal                                                                                                                                                                                                                                                                                                                                                                                                                                                                                                                                                                                                       | Cerclage of cervix, during pregnancy          |
| 59320     | Cerclage of cervix, during pregnancy; vaginal                                                                                                                                                                                                                                                                                                                                                                                                                                                                                                                                                                                                         | Cerclage of cervix, during pregnancy          |
| 15819     | Cervicoplasty                                                                                                                                                                                                                                                                                                                                                                                                                                                                                                                                                                                                                                         | Cervicoplasty                                 |

| Continued |                                                                                                                                                                 |                                                      |
|-----------|-----------------------------------------------------------------------------------------------------------------------------------------------------------------|------------------------------------------------------|
| Code      | Code description                                                                                                                                                | Procedure type                                       |
| 59620     | Cesarean delivery only, following attempted vaginal delivery after previous cesarean delivery;                                                                  | Cesarean section                                     |
| 59618     | Routine obstetric care including antepartum care, cesarean delivery, and postpartum care, following attempted vaginal delivery after previous cesarean delivery | Cesarean section                                     |
| 59622     | Cesarean delivery only, following attempted vaginal delivery after previous cesarean delivery; including postpartum care                                        | Cesarean section                                     |
| 59514     | Cesarean delivery only;                                                                                                                                         | Cesarean section                                     |
| 59510     | Routine obstetric care including antepartum care, cesarean delivery, and postpartum care                                                                        | Cesarean section                                     |
| 59515     | Cesarean delivery only; including postpartum care                                                                                                               | Cesarean section                                     |
| 32810     | Closure of chest wall following open flap drainage for empyema (Clagett type procedure)                                                                         | Chest wall reconstruction                            |
| 47564     | Laparoscopy, surgical; cholecystectomy with exploration of common duct                                                                                          | Cholecystectomy - laparoscopic                       |
| 47563     | Laparoscopy, surgical; cholecystectomy with cholangiography                                                                                                     | Cholecystectomy - laparoscopic                       |
| 47562     | Laparoscopy, surgical; cholecystectomy                                                                                                                          | Cholecystectomy - laparoscopic                       |
| 47610     | Cholecystectomy with exploration of common duct;                                                                                                                | Cholecystectomy - open                               |
| 47605     | Cholecystectomy; with cholangiography                                                                                                                           | Cholecystectomy - open                               |
| 47480     | Cholecystotomy or cholecystostomy - open, with exploration, drainage, or removal of calculus (separate procedure)                                               | Cholecystectomy - open                               |
| 47600     | Cholecystectomy;                                                                                                                                                | Cholecystectomy - open                               |
| 47620     | Cholecystectomy with exploration of common duct; with transduodenal sphincterotomy or sphincteroplasty, with or without cholangiography                         | Cholecystectomy - open                               |
| 47612     | Cholecystectomy with exploration of common duct; with choledochenterostomy                                                                                      | Cholecystectomy - open                               |
| 66720     | Ciliary body destruction; cryotherapy                                                                                                                           | Ciliary body destruction                             |
| 66711     | Ciliary body destruction; cyclophotocoagulation, endoscopic                                                                                                     | Ciliary body destruction                             |
| 66700     | Ciliary body destruction; diathermy                                                                                                                             | Ciliary body destruction                             |
| 66710     | Ciliary body destruction; cyclophotocoagulation, transscleral                                                                                                   | Ciliary body destruction                             |
| 66740     | Ciliary body destruction; cyclodialysis                                                                                                                         | Ciliary body destruction                             |
| 24940     | Cineplasty, upper extremity, complete procedure                                                                                                                 | Cineplasty, upper extremity                          |
| 23125     | Claviculectomy; total                                                                                                                                           | Claviculectomy                                       |
| 23120     | Claviculectomy; partial                                                                                                                                         | Claviculectomy                                       |
| 40761     | Plastic repair of cleft lip/nasal deformity; with cross lip pedicle flap (Abbe- Estlander type), including sectioning and inserting of pedicle                  | Cleft lip repair                                     |
| 40720     | Plastic repair of cleft lip/nasal deformity; secondary, by recreation of defect and reclosure                                                                   | Cleft lip repair                                     |
| 40701     | Plastic repair of cleft lip/nasal deformity; primary bilateral, 1-stage procedure                                                                               | Cleft lip repair                                     |
| 40702     | Plastic repair of cleft lip/nasal deformity; primary bilateral, 1 of 2 stages                                                                                   | Cleft lip repair                                     |
| 40700     | Plastic repair of cleft lip/nasal deformity; primary, partial or complete, unilateral                                                                           | Cleft lip repair                                     |
| 33722     | Closure of aortico-left ventricular tunnel                                                                                                                      | Closure of aortico-left ventricular tunnel           |
| 51880     | Closure of cystostomy (separate procedure)                                                                                                                      | Closure of cystostomy                                |
| 44620     | Closure of enterostomy, large or small intestine;                                                                                                               | Closure of enterostomy                               |
| 43420     | Closure of esophagostomy or fistula; cervical approach                                                                                                          | Closure of esophagostomy or fistula                  |
| 43425     | Closure of esophagostomy or fistula; transthoracic or transabdominal approach                                                                                   | Closure of esophagostomy or fistula                  |
| 43880     | Closure of gastrocolic fistula                                                                                                                                  | Closure of gastrocolic fistula                       |
| 44650     | Closure of enteroenteric or enterocolic fistula                                                                                                                 | Closure of intestinal fistula                        |
| 44660     | Closure of enterovesical fistula; without intestinal or bladder resection                                                                                       | Closure of intestinal fistula                        |
| 44640     | Closure of intestinal cutaneous fistula                                                                                                                         | Closure of intestinal fistula                        |
| 44661     | Closure of enterovesical fistula; with intestine and/or bladder resection                                                                                       | Closure of intestinal fistula                        |
| 68770     | Closure of lacrimal fistula (separate procedure)                                                                                                                | Closure of lacrimal fistula                          |
| 32815     | Open closure of major bronchial fistula                                                                                                                         | Closure of major bronchial fistula                   |
| 50520     | Closure of nephrocutaneous or pyelocutaneous fistula                                                                                                            | Closure of nephrocutaneous or pyelocutaneous fistula |
| 50526     | Closure of nephrovisceral fistula (eg, renocolic), including visceral repair; thoracic approach                                                                 | Closure of nephrovisceral fistula                    |
| 50525     | Closure of nephrovisceral fistula (eg, renocolic), including visceral repair; abdominal approach                                                                | Closure of nephrovisceral fistula                    |
| 69700     | Closure postauricular fistula, mastoid (separate procedure)                                                                                                     | Closure of postauricular fistula, mastoid            |
| 57308     | Closure of rectovaginal fistula; transperineal approach, with perineal body reconstruction, with or without levator plication                                   | Closure of rectovesical fistula                      |

| Continued |                                                                                                                                                                                                                |                                             |
|-----------|----------------------------------------------------------------------------------------------------------------------------------------------------------------------------------------------------------------|---------------------------------------------|
| Code      | Code description                                                                                                                                                                                               | Procedure type                              |
| 57307     | Closure of rectovaginal fistula; abdominal approach, with concomitant colostomy                                                                                                                                | Closure of rectovesical fistula             |
| 51900     | Closure of vesicovaginal fistula, abdominal approach                                                                                                                                                           | Closure of rectovesical fistula             |
| 57305     | Closure of rectovaginal fistula; abdominal approach                                                                                                                                                            | Closure of rectovesical fistula             |
| 45825     | Closure of rectourethral fistula; with colostomy                                                                                                                                                               | Closure of rectovesical fistula             |
| 45820     | Closure of rectourethral fistula;                                                                                                                                                                              | Closure of rectovesical fistula             |
| 45805     | Closure of rectovesical fistula; with colostomy                                                                                                                                                                | Closure of rectovesical fistula             |
| 45800     | Closure of rectovesical fistula;                                                                                                                                                                               | Closure of rectovesical fistula             |
| 42600     | Closure salivary fistula                                                                                                                                                                                       | Closure of salivary fistula                 |
| 68761     | Closure of the lacrimal punctum; by plug, each                                                                                                                                                                 | Closure of the lacrimal punctum             |
| 68760     | Closure of the lacrimal punctum; by thermocauterization, ligation, or laser surgery                                                                                                                            | Closure of the lacrimal punctum             |
| 50930     | Closure of ureterovisceral fistula (including visceral repair)                                                                                                                                                 | Closure of ureterocutaneous fistula         |
| 50920     | Closure of ureterocutaneous fistula                                                                                                                                                                            | Closure of ureterocutaneous fistula         |
| 53520     | Closure of urethrostomy or urethrocutaneous fistula, male (separate procedure)                                                                                                                                 | Closure of ureterocutaneous fistula         |
| 57320     | Closure of vesicovaginal fistula; vaginal approach                                                                                                                                                             | Closure of vaginal fistula                  |
| 57311     | Closure of urethrovaginal fistula; with bulbo cavernosus transplant                                                                                                                                            | Closure of vaginal fistula                  |
| 57330     | Closure of vesicovaginal fistula; transvesical and vaginal approach                                                                                                                                            | Closure of vaginal fistula                  |
| 57300     | Closure of rectovaginal fistula; vaginal or transanal approach                                                                                                                                                 | Closure of vaginal fistula                  |
| 57310     | Closure of urethrovaginal fistula;                                                                                                                                                                             | Closure of vaginal fistula                  |
| 51925     | Closure of vesicouterine fistula; with hysterectomy                                                                                                                                                            | Closure of vesicouterine fistula            |
| 51920     | Closure of vesicouterine fistula;                                                                                                                                                                              | Closure of vesicouterine fistula            |
| 51940     | Closure, exstrophy of bladder                                                                                                                                                                                  | Closure, exstrophy of bladder               |
| 27080     | Coccygectomy, primary                                                                                                                                                                                          | Coccygectomy, primary                       |
| 69930     | Cochlear device implantation, with or without mastoidectomy                                                                                                                                                    | Cochlear device implantation                |
| 44207     | Laparoscopy, surgical; colectomy, partial, with anastomosis, with coloproctostomy (low pelvic anastomosis)                                                                                                     | Colectomy and/or proctectomy - laparoscopic |
| 44204     | Laparoscopy, surgical; colectomy, partial, with anastomosis                                                                                                                                                    | Colectomy and/or proctectomy - laparoscopic |
| 44211     | Laparoscopy, surgical; colectomy, total, abdominal, with proctectomy, with ileoanal anastomosis, creation of ileal reservoir (S or J), with loop ileostomy, includes rectal mucosectomy, when performed        | Colectomy and/or proctectomy - laparoscopic |
| 44212     | Laparoscopy, surgical; colectomy, total, abdominal, with proctectomy, with ileostomy                                                                                                                           | Colectomy and/or proctectomy - laparoscopic |
| 45397     | Laparoscopy, surgical; proctectomy, combined abdominoperineal pull-through procedure (eg, colo-anal anastomosis), with creation of colonic reservoir (eg, J-pouch), with diverting enterostomy, when performed | Colectomy and/or proctectomy - laparoscopic |
| 45395     | Laparoscopy, surgical; proctectomy, complete, combined abdominoperineal, with colostomy                                                                                                                        | Colectomy and/or proctectomy - laparoscopic |
| 44210     | Laparoscopy, surgical; colectomy, total, abdominal, without proctectomy, with ileostomy or ileoproctostomy                                                                                                     | Colectomy and/or proctectomy - laparoscopic |
| 44208     | Laparoscopy, surgical; colectomy, partial, with anastomosis, with coloproctostomy (low pelvic anastomosis) with colostomy                                                                                      | Colectomy and/or proctectomy - laparoscopic |
| 44205     | Laparoscopy, surgical; colectomy, partial, with removal of terminal ileum with ileocolostomy                                                                                                                   | Colectomy and/or proctectomy - laparoscopic |
| 44206     | Laparoscopy, surgical; colectomy, partial, with end colostomy and closure of distal segment (Hartmann type procedure)                                                                                          | Colectomy and/or proctectomy - laparoscopic |
| 45110     | Proctectomy; complete, combined abdominoperineal, with colostomy                                                                                                                                               | Colectomy and/or proctectomy - open         |
| 44157     | Colectomy, total, abdominal, with proctectomy; with ileoanal anastomosis, includes loop ileostomy, and rectal mucosectomy, when performed                                                                      | Colectomy and/or proctectomy - open         |
| 44158     | Colectomy, total, abdominal, with proctectomy; with ileoanal anastomosis, creation of ileal reservoir (S or J), includes loop ileostomy, and rectal mucosectomy, when performed                                | Colectomy and/or proctectomy - open         |
| 44160     | Colectomy, partial, with removal of terminal ileum with ileocolostomy                                                                                                                                          | Colectomy and/or proctectomy - open         |
| 44155     | Colectomy, total, abdominal, with proctectomy; with ileostomy                                                                                                                                                  | Colectomy and/or proctectomy - open         |
| 44151     | Colectomy, total, abdominal, without proctectomy; with continent ileostomy                                                                                                                                     | Colectomy and/or proctectomy - open         |
| 44156     | Colectomy, total, abdominal, with proctectomy; with continent ileostomy                                                                                                                                        | Colectomy and/or proctectomy - open         |
| 44146     | Colectomy, partial; with coloproctostomy (low pelvic anastomosis), with colostomy                                                                                                                              | Colectomy and/or proctectomy - open         |

| Continued |                                                                                                                                                                                         |                                                    |
|-----------|-----------------------------------------------------------------------------------------------------------------------------------------------------------------------------------------|----------------------------------------------------|
| Code      | Code description                                                                                                                                                                        | Procedure type                                     |
| 44144     | Colectomy, partial; with resection, with colostomy or ileostomy and creation of mucofistula                                                                                             | Colectomy and/or proctectomy - open                |
| 44143     | Colectomy, partial; with end colostomy and closure of distal segment (Hartmann type procedure)                                                                                          | Colectomy and/or proctectomy - open                |
| 44141     | Colectomy, partial; with skin level cecostomy or colostomy                                                                                                                              | Colectomy and/or proctectomy - open                |
| 44150     | Colectomy, total, abdominal, without proctectomy; with ileostomy or ileoproctostomy                                                                                                     | Colectomy and/or proctectomy - open                |
| 45121     | Proctectomy, complete (for congenital megacolon), abdominal and perineal approach; with subtotal or total colectomy, with multiple biopsies                                             | Colectomy and/or proctectomy - open                |
| 45120     | Proctectomy, complete (for congenital megacolon), abdominal and perineal approach; with pull-through procedure and anastomosis (eg, Swenson, Duhamel, or Soave type operation)          | Colectomy and/or proctectomy - open                |
| 45119     | Proctectomy, combined abdominoperineal pull-through procedure (eg, colo- anal anastomosis), with creation of colonic reservoir (eg, J-pouch), with diverting enterostomy when performed | Colectomy and/or proctectomy - open                |
| 45112     | Proctectomy, combined abdominoperineal, pull-through procedure (eg, colo- anal anastomosis)                                                                                             | Colectomy and/or proctectomy - open                |
| 45111     | Proctectomy; partial resection of rectum, transabdominal approach                                                                                                                       | Colectomy and/or proctectomy - open                |
| 44145     | Colectomy, partial; with coloproctostomy (low pelvic anastomosis)                                                                                                                       | Colectomy and/or proctectomy - open                |
| 44140     | Colectomy, partial; with anastomosis                                                                                                                                                    | Colectomy and/or proctectomy - open                |
| 45114     | Proctectomy, partial, with anastomosis; abdominal and transsacral approach                                                                                                              | Colectomy and/or proctectomy - open                |
| 44147     | Colectomy, partial; abdominal and transanal approach                                                                                                                                    | Colectomy and/or proctectomy - open                |
| 45123     | Proctectomy, partial, without anastomosis, perineal approach                                                                                                                            | Colectomy and/or proctectomy - open                |
| 45116     | Proctectomy, partial, with anastomosis; transsacral approach only (Kraske type)                                                                                                         | Colectomy and/or proctectomy - open                |
| 45113     | Proctectomy, partial, with rectal mucosectomy, ileoanal anastomosis, creation of ileal reservoir (S or J), with or without loop ileostomy                                               | Colectomy and/or proctectomy - open                |
| 44188     | Laparoscopy, surgical, colostomy or skin level cecostomy                                                                                                                                | Colostomy - laparoscopic                           |
| 44345     | Revision of colostomy; complicated (reconstruction in-depth) (separate procedure)                                                                                                       | Colostomy - open                                   |
| 44340     | Revision of colostomy; simple (release of superficial scar) (separate procedure)                                                                                                        | Colostomy - open                                   |
| 44322     | Colostomy or skin level cecostomy; with multiple biopsies (eg, for congenital megacolon) (separate procedure)                                                                           | Colostomy - open                                   |
| 44320     | Colostomy or skin level cecostomy;                                                                                                                                                      | Colostomy - open                                   |
| 44346     | Revision of colostomy; with repair of paracolostomy hernia (separate procedure)                                                                                                         | Colostomy - open                                   |
| 44025     | Colotomy, for exploration, biopsy(s), or foreign body removal                                                                                                                           | Colotomy                                           |
| 57120     | Colpocleisis (Le Fort type)                                                                                                                                                             | Colpocleisis (Le Fort type)                        |
| 57210     | Colpoperineorrhaphy, suture of injury of vagina and/or perineum (nonobstetrical)                                                                                                        | Colpoperineorrhaphy                                |
| 57425     | Laparoscopy, surgical, colpopexy (suspension of vaginal apex)                                                                                                                           | Colpopexy - laparoscopic                           |
| 57280     | Colpopexy, abdominal approach                                                                                                                                                           | Colpopexy - open                                   |
| 57283     | Colpopexy, vaginal; intra-peritoneal approach (uterosacral, levator myorrhaphy)                                                                                                         | Colpopexy - open                                   |
| 57282     | Colpopexy, vaginal; extra-peritoneal approach (sacrospinous, iliococcygeus)                                                                                                             | Colpopexy - open                                   |
| 57265     | Combined anteroposterior colporrhaphy; with enterocele repair                                                                                                                           | Colporrhaphy                                       |
| 57250     | Posterior colporrhaphy, repair of rectocele with or without perineorrhaphy                                                                                                              | Colporrhaphy                                       |
| 57260     | Combined anteroposterior colporrhaphy;                                                                                                                                                  | Colporrhaphy                                       |
| 57200     | Colporrhaphy, suture of injury of vagina (nonobstetrical)                                                                                                                               | Colporrhaphy                                       |
| 57240     | Anterior colporrhaphy, repair of cystocele with or without repair of urethrocele                                                                                                        | Colporrhaphy                                       |
| 13150     | Repair, complex, eyelids, nose, ears and/or lips; 1.0 cm or less                                                                                                                        | Complex repair of eyelids, nose, ears, and/or lips |
| 21050     | Condylectomy, temporomandibular joint (separate procedure)                                                                                                                              | Condylectomy of temporomandibular joint            |
| 68750     | Conjunctivorhinostomy (fistulization of conjunctiva to nasal cavity); with insertion of tube or stent                                                                                   | Conjunctival flap                                  |
| 68326     | Conjunctivoplasty, reconstruction cul-de-sac; with conjunctival graft or extensive rearrangement                                                                                        | Conjunctival flap                                  |
| 68745     | Conjunctivorhinostomy (fistulization of conjunctiva to nasal cavity); without tube                                                                                                      | Conjunctival flap                                  |
| 68362     | Conjunctival flap; total (such as Gunderson thin flap or purse string flap)                                                                                                             | Conjunctival flap                                  |
| 68328     | Conjunctivoplasty, reconstruction cul-de-sac; with buccal mucous membrane graft (includes obtaining graft)                                                                              | Conjunctival flap                                  |
| 68360     | Conjunctival flap; bridge or partial (separate procedure)                                                                                                                               | Conjunctival flap                                  |
| 68325     | Conjunctivoplasty; with buccal mucous membrane graft (includes obtaining graft)                                                                                                         | Conjunctival flap                                  |
| 68320     | Conjunctivoplasty; with conjunctival graft or extensive rearrangement                                                                                                                   | Conjunctival flap                                  |

| Continued |                                                                                                                                                      |                                                                                                       |
|-----------|------------------------------------------------------------------------------------------------------------------------------------------------------|-------------------------------------------------------------------------------------------------------|
| Code      | Code description                                                                                                                                     | Procedure type                                                                                        |
| 57292     | Construction of artificial vagina; with graft                                                                                                        | Construction of artificial vagina                                                                     |
| 57291     | Construction of artificial vagina; without graft                                                                                                     | Construction of artificial vagina                                                                     |
| 67880     | Construction of intermarginal adhesions, median tarsorrhaphy, or canthorrhaphy;                                                                      | Construction of intermarginal adhesions, median tarsorrhaphy, or canthorrhaphy                        |
| 67882     | Construction of intermarginal adhesions, median tarsorrhaphy, or canthorrhaphy; with transposition of tarsal plate                                   | Construction of intermarginal adhesions, median tarsorrhaphy, or canthorrhaphy                        |
| 31611     | Construction of tracheoesophageal fistula and subsequent insertion of an alaryngeal speech prosthesis (eg, voice button, Blom-Singer prosthesis)     | Construction of tracheoesophageal fistula and subsequent insertion of an alaryngeal speech prosthesis |
| 42972     | Control of nasopharyngeal hemorrhage, primary or secondary (eg, postadenoidectomy); with secondary surgical intervention                             | Control of nasopharyngeal or oropharyngeal hemorrhage                                                 |
| 42971     | Control of nasopharyngeal hemorrhage, primary or secondary (eg, postadenoidectomy); complicated, requiring hospitalization                           | Control of nasopharyngeal or oropharyngeal hemorrhage                                                 |
| 42962     | Control oropharyngeal hemorrhage, primary or secondary (eg, posttonsillectomy); with secondary surgical intervention                                 | Control of nasopharyngeal or oropharyngeal hemorrhage                                                 |
| 42961     | Control oropharyngeal hemorrhage, primary or secondary (eg, posttonsillectomy); complicated, requiring hospitalization                               | Control of nasopharyngeal or oropharyngeal hemorrhage                                                 |
| 23415     | Coracoacromial ligament release, with or without acromioplasty                                                                                       | Coracoacromial ligament release                                                                       |
| 65772     | Corneal relaxing incision for correction of surgically induced astigmatism                                                                           | Corneal relaxing incision for correction of surgically induced astigmatism                            |
| 65775     | Corneal wedge resection for correction of surgically induced astigmatism                                                                             | Corneal wedge resection for correction of surgically induced astigmatism                              |
| 21070     | Coronoidectomy (separate procedure)                                                                                                                  | Coronoidectomy                                                                                        |
| 54420     | Corpora cavernosa-saphenous vein shunt (priapism operation), unilateral or bilateral                                                                 | Corpora cavernosa shunts fore priapism                                                                |
| 54430     | Corpora cavernosa-corpora spongiosum shunt (priapism operation), unilateral or bilateral                                                             | Corpora cavernosa shunts fore priapism                                                                |
| 28299     | Correction, hallux valgus (bunion), with or without sesamoidectomy; by double osteotomy                                                              | Correction of hallux valgus                                                                           |
| 28298     | Correction, hallux valgus (bunion), with or without sesamoidectomy; by phalanx osteotomy                                                             | Correction of hallux valgus                                                                           |
| 28297     | Correction, hallux valgus (bunion), with or without sesamoidectomy; Lapidus- type procedure                                                          | Correction of hallux valgus                                                                           |
| 28295     | Correction, hallux valgus (bunionectomy), with sesamoidectomy, when performed; with proximal metatarsal osteotomy, any method                        | Correction of hallux valgus                                                                           |
| 28296     | Correction, hallux valgus (bunion), with or without sesamoidectomy; with metatarsal osteotomy (eg, Mitchell, Chevron, or concentric type procedures) | Correction of hallux valgus                                                                           |
| 28292     | Correction, hallux valgus (bunion), with or without sesamoidectomy; Keller, McBride, or Mayo type procedure                                          | Correction of hallux valgus                                                                           |
| 28291     | Hallux rigidus correction with cheilectomy, debridement and capsular release of the first metatarsophalangeal joint; with implant                    | Correction of hallux valgus                                                                           |
| 28294     | Correction, hallux valgus (bunion), with or without sesamoidectomy; with tendon transplants (eg, Joplin type procedure)                              | Correction of hallux valgus                                                                           |
| 28290     | Correction, hallux valgus (bunion), with or without sesamoidectomy; simple exostectomy (eg, Silver type procedure)                                   | Correction of hallux valgus                                                                           |
| 28285     | Correction, hammertoe (eg, interphalangeal fusion, partial or total phalangectomy)                                                                   | Correction of hallux valgus                                                                           |
| 28289     | Hallux rigidus correction with cheilectomy, debridement and capsular release of the first metatarsophalangeal joint                                  | Correction of hallux valgus                                                                           |
| 28293     | Correction, hallux valgus (bunion), with or without sesamoidectomy; resection of joint with implant                                                  | Correction of hallux valgus                                                                           |
| 67912     | Correction of lagophthalmos, with implantation of upper eyelid lid load (eg, gold weight)                                                            | Correction of lagophthalmos                                                                           |
| 67911     | Correction of lid retraction                                                                                                                         | Correction of lid retraction                                                                          |
| 21610     | Costotransversectomy (separate procedure)                                                                                                            | Costotransversectomy                                                                                  |
| 61512     | Craniectomy, trephination, bone flap craniotomy; for excision of meningioma, supratentorial                                                          | Craniectomy or craniotomy                                                                             |
| 62100     | Craniotomy for repair of dural/cerebrospinal fluid leak, including surgery for rhinorrhea/ otorrhea                                                  | Craniectomy or craniotomy                                                                             |
| 62121     | Craniotomy for repair of encephalocele, skull base                                                                                                   | Craniectomy or craniotomy                                                                             |
| 61870     | Craniectomy for implantation of neurostimulator electrodes, cerebellar; cortical                                                                     | Craniectomy or craniotomy                                                                             |
| 61571     | Craniectomy or craniotomy; with treatment of penetrating wound of brain                                                                              | Craniectomy or craniotomy                                                                             |
| 61570     | Craniectomy or craniotomy; with excision of foreign body from brain                                                                                  | Craniectomy or craniotomy                                                                             |

| Continued |                                                                                                                                                                                              |                           |
|-----------|----------------------------------------------------------------------------------------------------------------------------------------------------------------------------------------------|---------------------------|
| Code      | Code description                                                                                                                                                                             | Procedure type            |
| 61567     | Craniotomy with elevation of bone flap; for multiple subpial transections, with electrocorticography during surgery                                                                          | Craniectomy or craniotomy |
| 61566     | Craniotomy with elevation of bone flap; for selective amygdalohippocampectomy                                                                                                                | Craniectomy or craniotomy |
| 61546     | Craniotomy for hypophysectomy or excision of pituitary tumor, intracranial approach                                                                                                          | Craniectomy or craniotomy |
| 61545     | Craniotomy with elevation of bone flap; for excision of craniopharyngioma                                                                                                                    | Craniectomy or craniotomy |
| 61542     | Craniotomy with elevation of bone flap; for total hemispherectomy                                                                                                                            | Craniectomy or craniotomy |
| 61541     | Craniotomy with elevation of bone flap; for transection of corpus callosum                                                                                                                   | Craniectomy or craniotomy |
| 61539     | Craniotomy with elevation of bone flap; for lobectomy, other than temporal lobe, partial or total, with electrocorticography during surgery                                                  | Craniectomy or craniotomy |
| 61540     | Craniotomy with elevation of bone flap; for lobectomy, other than temporal lobe, partial or total, without electrocorticography during surgery                                               | Craniectomy or craniotomy |
| 61537     | Craniotomy with elevation of bone flap; for lobectomy, temporal lobe, without electrocorticography during surgery                                                                            | Craniectomy or craniotomy |
| 61538     | Craniotomy with elevation of bone flap; for lobectomy, temporal lobe, with electrocorticography during surgery                                                                               | Craniectomy or craniotomy |
| 61535     | Craniotomy with elevation of bone flap; for removal of epidural or subdural electrode array, without excision of cerebral tissue (separate procedure)                                        | Craniectomy or craniotomy |
| 61534     | Craniotomy with elevation of bone flap; for excision of epileptogenic focus without electrocorticography during surgery                                                                      | Craniectomy or craniotomy |
| 61533     | Craniotomy with elevation of bone flap; for subdural implantation of an electrode array, for long-term seizure monitoring                                                                    | Craniectomy or craniotomy |
| 61530     | Craniectomy, bone flap craniotomy, transtemporal (mastoid) for excision of cerebellopontine angle tumor; combined with middle/posterior fossa craniotomy/craniectomy                         | Craniectomy or craniotomy |
| 61544     | Craniotomy with elevation of bone flap; for excision or coagulation of choroid plexus                                                                                                        | Craniectomy or craniotomy |
| 61524     | Craniectomy, infratentorial or posterior fossa; for excision or fenestration of cyst                                                                                                         | Craniectomy or craniotomy |
| 61543     | Craniotomy with elevation of bone flap; for partial or subtotal (functional) hemispherectomy                                                                                                 | Craniectomy or craniotomy |
| 61536     | Craniotomy with elevation of bone flap; for excision of cerebral epileptogenic focus, with electrocorticography during surgery (includes removal of electrode array)                         | Craniectomy or craniotomy |
| 61522     | Craniectomy, infratentorial or posterior fossa; for excision of brain abscess                                                                                                                | Craniectomy or craniotomy |
| 61526     | Craniectomy, bone flap craniotomy, transtemporal (mastoid) for excision of cerebellopontine angle tumor;                                                                                     | Craniectomy or craniotomy |
| 61521     | Craniectomy for excision of brain tumor, infratentorial or posterior fossa; midline tumor at base of skull                                                                                   | Craniectomy or craniotomy |
| 61520     | Craniectomy for excision of brain tumor, infratentorial or posterior fossa; cerebellopontine angle tumor                                                                                     | Craniectomy or craniotomy |
| 61510     | Craniectomy, trephination, bone flap craniotomy; for excision of brain tumor, supratentorial, except meningioma                                                                              | Craniectomy or craniotomy |
| 61875     | Craniectomy for implantation of neurostimulator electrodes, cerebellar; subcortical                                                                                                          | Craniectomy or craniotomy |
| 61860     | Craniectomy or craniotomy for implantation of neurostimulator electrodes, cerebral, cortical                                                                                                 | Craniectomy or craniotomy |
| 61519     | Craniectomy for excision of brain tumor, infratentorial or posterior fossa; meningioma                                                                                                       | Craniectomy or craniotomy |
| 61518     | Craniectomy for excision of brain tumor, infratentorial or posterior fossa; except meningioma, cerebellopontine angle tumor, or midline tumor at base of skull                               | Craniectomy or craniotomy |
| 61516     | Craniectomy, trephination, bone flap craniotomy; for excision or fenestration of cyst, supratentorial                                                                                        | Craniectomy or craniotomy |
| 61500     | Craniectomy; with excision of tumor or other bone lesion of skull                                                                                                                            | Craniectomy or craniotomy |
| 61501     | Craniectomy; for osteomyelitis                                                                                                                                                               | Craniectomy or craniotomy |
| 61470     | Craniectomy, suboccipital; for medullary tractotomy                                                                                                                                          | Craniectomy or craniotomy |
| 61458     | Craniectomy, suboccipital; for exploration or decompression of cranial nerves                                                                                                                | Craniectomy or craniotomy |
| 61460     | Craniectomy, suboccipital; for section of 1 or more cranial nerves                                                                                                                           | Craniectomy or craniotomy |
| 61480     | Craniectomy, suboccipital; for mesencephalic tractotomy or pedunculotomy                                                                                                                     | Craniectomy or craniotomy |
| 61440     | Craniectomy for section of tentorium cerebelli (separate procedure)                                                                                                                          | Craniectomy or craniotomy |
| 61450     | Craniectomy, subtemporal, for section, compression, or decompression of sensory root of gasserian ganglion                                                                                   | Craniectomy or craniotomy |
| 61323     | Craniectomy or craniotomy, decompressive, with or without duraplasty, for treatment of intracranial hypertension, without evacuation of associated intraparenchymal hematoma; with lobectomy | Craniectomy or craniotomy |

| Continued |                                                                                                                                                                                                                |                                                                           |
|-----------|----------------------------------------------------------------------------------------------------------------------------------------------------------------------------------------------------------------|---------------------------------------------------------------------------|
| Code      | Code description                                                                                                                                                                                               | Procedure type                                                            |
| 61514     | Craniectomy, trephination, bone flap craniotomy; for excision of brain abscess, supratentorial                                                                                                                 | Craniectomy or craniotomy                                                 |
| 61343     | Craniectomy, suboccipital with cervical laminectomy for decompression of medulla and spinal cord, with or without dural graft (eg, Arnold-Chiari malformation)                                                 | Craniectomy or craniotomy                                                 |
| 61321     | Craniectomy or craniotomy, drainage of intracranial abscess; infratentorial                                                                                                                                    | Craniectomy or craniotomy                                                 |
| 61322     | Craniectomy or craniotomy, decompressive, with or without duraplasty, for treatment of intracranial hypertension, without evacuation of associated intraparenchymal hematoma; without lobectomy                | Craniectomy or craniotomy                                                 |
| 61314     | Craniectomy or craniotomy for evacuation of hematoma, infratentorial; extradural or subdural                                                                                                                   | Craniectomy or craniotomy                                                 |
| 61320     | Craniectomy or craniotomy, drainage of intracranial abscess; supratentorial                                                                                                                                    | Craniectomy or craniotomy                                                 |
| 61490     | Craniotomy for lobotomy, including cingulotomy                                                                                                                                                                 | Craniectomy or craniotomy                                                 |
| 61313     | Craniectomy or craniotomy for evacuation of hematoma, supratentorial; intracerebral                                                                                                                            | Craniectomy or craniotomy                                                 |
| 61315     | Craniectomy or craniotomy for evacuation of hematoma, infratentorial; intracerebellar                                                                                                                          | Craniectomy or craniotomy                                                 |
| 61312     | Craniectomy or craniotomy for evacuation of hematoma, supratentorial; extradural or subdural                                                                                                                   | Craniectomy or craniotomy                                                 |
| 61305     | Craniectomy or craniotomy, exploratory; infratentorial (posterior fossa)                                                                                                                                       | Craniectomy or craniotomy                                                 |
| 61304     | Craniectomy or craniotomy, exploratory; supratentorial                                                                                                                                                         | Craniectomy or craniotomy                                                 |
| 61585     | Orbitocranial approach to anterior cranial fossa, extradural, including supraorbital ridge osteotomy and elevation of frontal and/or temporal lobe(s); with orbital exenteration                               | Craniofacial, orbitocranial, bicoronal approach to anterior cranial fossa |
| 61583     | Craniofacial approach to anterior cranial fossa; intradural, including unilateral or bifrontal craniotomy, elevation or resection of frontal lobe, osteotomy of base of anterior cranial fossa                 | Craniofacial, orbitocranial, bicoronal approach to anterior cranial fossa |
| 61582     | Craniofacial approach to anterior cranial fossa; extradural, including unilateral or bifrontal craniotomy, elevation of frontal lobe(s), osteotomy of base of anterior cranial fossa                           | Craniofacial, orbitocranial, bicoronal approach to anterior cranial fossa |
| 61580     | Craniofacial approach to anterior cranial fossa; extradural, including lateral rhinotomy, ethmoidectomy, sphenoidectomy, without maxillectomy or orbital exenteration                                          | Craniofacial, orbitocranial, bicoronal approach to anterior cranial fossa |
| 61586     | Bicoronal, transzygomatic and/or LeFort I osteotomy approach to anterior cranial fossa with or without internal fixation, without bone graft                                                                   | Craniofacial, orbitocranial, bicoronal approach to anterior cranial fossa |
| 61584     | Orbitocranial approach to anterior cranial fossa, extradural, including supraorbital ridge osteotomy and elevation of frontal and/or temporal lobe(s); without orbital exenteration                            | Craniofacial, orbitocranial, bicoronal approach to anterior cranial fossa |
| 61581     | Craniofacial approach to anterior cranial fossa; extradural, including lateral rhinotomy, orbital exenteration, ethmoidectomy, sphenoidectomy and/or maxillectomy                                              | Craniofacial, orbitocranial, bicoronal approach to anterior cranial fossa |
| 62146     | Cranioplasty with autograft (includes obtaining bone grafts); up to 5 cm diameter                                                                                                                              | Cranioplasty                                                              |
| 62145     | Cranioplasty for skull defect with reparative brain surgery                                                                                                                                                    | Cranioplasty                                                              |
| 62147     | Cranioplasty with autograft (includes obtaining bone grafts); larger than 5 cm diameter                                                                                                                        | Cranioplasty                                                              |
| 62143     | Replacement of bone flap or prosthetic plate of skull                                                                                                                                                          | Cranioplasty                                                              |
| 62141     | Cranioplasty for skull defect; larger than 5 cm diameter                                                                                                                                                       | Cranioplasty                                                              |
| 62140     | Cranioplasty for skull defect; up to 5 cm diameter                                                                                                                                                             | Cranioplasty                                                              |
| 62117     | Reduction of craniomegalic skull (eg, treated hydrocephalus); requiring craniotomy and reconstruction with or without bone graft (includes obtaining grafts)                                                   | Cranioplasty                                                              |
| 62142     | Removal of bone flap or prosthetic plate of skull                                                                                                                                                              | Cranioplasty                                                              |
| 62115     | Reduction of craniomegalic skull (eg, treated hydrocephalus); not requiring bone grafts or cranioplasty                                                                                                        | Cranioplasty                                                              |
| 61559     | Extensive craniectomy for multiple cranial suture craniosynostosis (eg, cloverleaf skull); recontouring with multiple osteotomies and bone autografts (eg, barrel-stave procedure) (includes obtaining grafts) | Cranioplasty                                                              |
| 61558     | Extensive craniectomy for multiple cranial suture craniosynostosis (eg, cloverleaf skull); not requiring bone grafts                                                                                           | Cranioplasty                                                              |
| 61556     | Craniotomy for craniosynostosis; frontal or parietal bone flap                                                                                                                                                 | Cranioplasty                                                              |
| 62116     | Reduction of craniomegalic skull (eg, treated hydrocephalus); with simple cranioplasty                                                                                                                         | Cranioplasty                                                              |
| 61552     | Craniectomy for craniosynostosis; multiple cranial sutures                                                                                                                                                     | Cranioplasty                                                              |
| 61550     | Craniectomy for craniosynostosis; single cranial suture                                                                                                                                                        | Cranioplasty                                                              |
| 61557     | Craniotomy for craniosynostosis; bifrontal bone flap                                                                                                                                                           | Cranioplasty                                                              |
| 61735     | Creation of lesion by stereotactic method, including burr hole(s) and localizing and recording techniques, single or multiple stages; subcortical structure(s) other than globus pallidus or thalamus          | Creation of lesion by stereotactic method                                 |

| Continued |                                                                                                                                                                                                                                                                           |                                                                                                     |
|-----------|---------------------------------------------------------------------------------------------------------------------------------------------------------------------------------------------------------------------------------------------------------------------------|-----------------------------------------------------------------------------------------------------|
| Code      | Code description                                                                                                                                                                                                                                                          | Procedure type                                                                                      |
| 61720     | Creation of lesion by stereotactic method, including burr hole(s) and localizing and recording techniques, single or multiple stages; globus pallidus or thalamus                                                                                                         | Creation of lesion by stereotactic method                                                           |
| 33025     | Creation of pericardial window or partial resection for drainage                                                                                                                                                                                                          | Creation of pericardial window                                                                      |
| 63740     | Creation of shunt, lumbar, subarachnoid-peritoneal, -pleural, or other; including laminectomy                                                                                                                                                                             | Creation of shunt, lumbar, subarachnoid-peritoneal, -pleural, or other; with or without laminectomy |
| 63741     | Creation of shunt, lumbar, subarachnoid-peritoneal, -pleural, or other; percutaneous, not requiring laminectomy                                                                                                                                                           | Creation of shunt, lumbar, subarachnoid-peritoneal, -pleural, or other; with or without laminectomy |
| 43030     | Cricopharyngeal myotomy                                                                                                                                                                                                                                                   | Cricopharyngeal myotomy                                                                             |
| 31592     | Cricotracheal resection                                                                                                                                                                                                                                                   | Cricotracheal resection                                                                             |
| 55873     | Cryosurgical ablation of the prostate (includes ultrasonic guidance and monitoring)                                                                                                                                                                                       | Cryosurgical ablation of the prostate                                                               |
| 62258     | Removal of complete cerebrospinal fluid shunt system; with replacement by similar or other shunt at same operation                                                                                                                                                        | CSF shunt                                                                                           |
| 62256     | Removal of complete cerebrospinal fluid shunt system; without replacement                                                                                                                                                                                                 | CSF shunt                                                                                           |
| 62223     | Creation of shunt; ventriculo-peritoneal, -pleural, other terminus                                                                                                                                                                                                        | CSF shunt                                                                                           |
| 62192     | Creation of shunt, subarachnoid/subdural-peritoneal, -pleural, other terminus                                                                                                                                                                                             | CSF shunt                                                                                           |
| 62190     | Creation of shunt, subarachnoid/subdural-atrial, -jugular, -auricular                                                                                                                                                                                                     | CSF shunt                                                                                           |
| 37193     | Retrieval (removal) of intravascular vena cava filter, endovascular approach including vascular access, vessel selection, and radiological supervision and interpretation, intraprocedural roadmapping, and imaging guidance (ultrasound and fluoroscopy), when performed | CSF shunt                                                                                           |
| 37192     | Repositioning of intravascular vena cava filter, endovascular approach including vascular access, vessel selection, and radiological supervision and interpretation, intraprocedural roadmapping, and imaging guidance (ultrasound and fluoroscopy), when performed       | CSF shunt                                                                                           |
| 37191     | Insertion of intravascular vena cava filter, endovascular approach including vascular access, vessel selection, and radiological supervision and interpretation, intraprocedural roadmapping, and imaging guidance (ultrasound and fluoroscopy), when performed           | CSF shunt                                                                                           |
| 62230     | Replacement or revision of cerebrospinal fluid shunt, obstructed valve, or distal catheter in shunt system                                                                                                                                                                | CSF shunt                                                                                           |
| 62220     | Creation of shunt; ventriculo-atrial, -jugular, -auricular                                                                                                                                                                                                                | CSF shunt                                                                                           |
| 50845     | Cutaneous appendico-vesicostomy                                                                                                                                                                                                                                           | Cutaneous appendico-vesicostomy                                                                     |
| 51980     | Cutaneous vesicostomy                                                                                                                                                                                                                                                     | Cutaneous vesicostomy                                                                               |
| 51596     | Cystectomy, complete, with continent diversion, any open technique, using any segment of small and/or large intestine to construct neobladder                                                                                                                             | Cystectomy                                                                                          |
| 51595     | Cystectomy, complete, with ureteroileal conduit or sigmoid bladder, including intestine anastomosis; with bilateral pelvic lymphadenectomy, including external iliac, hypogastric, and obturator nodes                                                                    | Cystectomy                                                                                          |
| 51590     | Cystectomy, complete, with ureteroileal conduit or sigmoid bladder, including intestine anastomosis;                                                                                                                                                                      | Cystectomy                                                                                          |
| 51585     | Cystectomy, complete, with ureterosigmoidostomy or ureterocutaneous transplantations; with bilateral pelvic lymphadenectomy, including external iliac, hypogastric, and obturator nodes                                                                                   | Cystectomy                                                                                          |
| 51580     | Cystectomy, complete, with ureterosigmoidostomy or ureterocutaneous transplantations;                                                                                                                                                                                     | Cystectomy                                                                                          |
| 51575     | Cystectomy, complete; with bilateral pelvic lymphadenectomy, including external iliac, hypogastric, and obturator nodes                                                                                                                                                   | Cystectomy                                                                                          |
| 51570     | Cystectomy, complete; (separate procedure)                                                                                                                                                                                                                                | Cystectomy                                                                                          |
| 51565     | Cystectomy, partial, with reimplantation of ureter(s) into bladder (ureteroneocystostomy)                                                                                                                                                                                 | Cystectomy                                                                                          |
| 51555     | Cystectomy, partial; complicated (eg, postradiation, previous surgery, difficult location)                                                                                                                                                                                | Cystectomy                                                                                          |
| 51550     | Cystectomy, partial; simple                                                                                                                                                                                                                                               | Cystectomy                                                                                          |
| 51050     | Cystolithotomy, cystotomy with removal of calculus, without vesical neck resection                                                                                                                                                                                        | Cystolithotomy, cystotomy with removal of calculus                                                  |
| 51800     | Cystoplasty or cystourethroplasty, plastic operation on bladder and/or vesical neck (anterior Y-plasty, vesical fundus resection), any procedure, with or without wedge resection of posterior vesical neck                                                               | Cystoplasty or cystourethroplasty                                                                   |
| 51865     | Cystorrhaphy, suture of bladder wound, injury or rupture; complicated                                                                                                                                                                                                     | Cystorrhaphy, suture of bladder wound, injury or rupture                                            |
| 51820     | Cystourethroplasty with unilateral or bilateral ureteroneocystostomy                                                                                                                                                                                                      | Cystorrhaphy, suture of bladder wound, injury or rupture                                            |

| Continued |                                                                                                                                                                                                       |                                                          |
|-----------|-------------------------------------------------------------------------------------------------------------------------------------------------------------------------------------------------------|----------------------------------------------------------|
| Code      | Code description                                                                                                                                                                                      | Procedure type                                           |
| 51860     | Cystorrhaphy, suture of bladder wound, injury or rupture; simple                                                                                                                                      | Cystorrhaphy, suture of bladder wound, injury or rupture |
| 51535     | Cystotomy for excision, incision, or repair of ureterocele                                                                                                                                            | Cystotomy or cystostomy                                  |
| 51530     | Cystotomy; for excision of bladder tumor                                                                                                                                                              | Cystotomy or cystostomy                                  |
| 51525     | Cystotomy; for excision of bladder diverticulum, single or multiple (separate procedure)                                                                                                              | Cystotomy or cystostomy                                  |
| 51520     | Cystotomy; for simple excision of vesical neck (separate procedure)                                                                                                                                   | Cystotomy or cystostomy                                  |
| 51065     | Cystotomy, with calculus basket extraction and/or ultrasonic or electrohydraulic fragmentation of ureteral calculus                                                                                   | Cystotomy or cystostomy                                  |
| 51045     | Cystotomy, with insertion of ureteral catheter or stent (separate procedure)                                                                                                                          | Cystotomy or cystostomy                                  |
| 51040     | Cystostomy, cystotomy with drainage                                                                                                                                                                   | Cystotomy or cystostomy                                  |
| 51030     | Cystotomy or cystostomy; with cryosurgical destruction of intravesical lesion                                                                                                                         | Cystotomy or cystostomy                                  |
| 51020     | Cystotomy or cystostomy; with fulguration and/or insertion of radioactive material                                                                                                                    | Cystotomy or cystostomy                                  |
| 68720     | Dacryocystorhinostomy (fistulization of lacrimal sac to nasal cavity)                                                                                                                                 | Dacryocystorhinostomy                                    |
| 23000     | Removal of subdeltoid calcareous deposits - open                                                                                                                                                      | Debridement of shoulder                                  |
| 11043     | Debridement, muscle and/or fascia (includes epidermis, dermis, and subcutaneous tissue, if performed); first 20 sq cm or less                                                                         | Debridement of skin, muscle, or bone                     |
| 11006     | Debridement of skin, subcutaneous tissue, muscle and fascia for necrotizing soft tissue infection; external genitalia, perineum and abdominal wall, with or without fascial closure                   | Debridement of skin, muscle, or bone                     |
| 11005     | Debridement of skin, subcutaneous tissue, muscle and fascia for necrotizing soft tissue infection; abdominal wall, with or without fascial closure                                                    | Debridement of skin, muscle, or bone                     |
| 11010     | Debridement including removal of foreign material at the site of an open fracture and/or an open dislocation (eg, excisional debridement); skin and subcutaneous tissues                              | Debridement of skin, muscle, or bone                     |
| 11011     | Debridement including removal of foreign material at the site of an open fracture and/or an open dislocation (eg, excisional debridement); skin, subcutaneous tissue, muscle fascia, and muscle       | Debridement of skin, muscle, or bone                     |
| 11012     | Debridement including removal of foreign material at the site of an open fracture and/or an open dislocation (eg, excisional debridement); skin, subcutaneous tissue, muscle fascia, muscle, and bone | Debridement of skin, muscle, or bone                     |
| 11044     | Debridement, bone (includes epidermis, dermis, subcutaneous tissue, muscle and/or fascia, if performed); first 20 sq cm or less                                                                       | Debridement of skin, muscle, or bone                     |
| 21750     | Closure of median sternotomy separation with or without debridement (separate procedure)                                                                                                              | Debridement of sternum                                   |
| 27894     | Decompression fasciotomy, leg; anterior and/or lateral, and posterior compartment(s), with debridement of nonviable muscle and/or nerve                                                               | Decompression fasciotomy of lower extremity              |
| 27892     | Decompression fasciotomy, leg; anterior and/or lateral compartments only, with debridement of nonviable muscle and/or nerve                                                                           | Decompression fasciotomy of lower extremity              |
| 27602     | Decompression fasciotomy, leg; anterior and/or lateral, and posterior compartment(s)                                                                                                                  | Decompression fasciotomy of lower extremity              |
| 27601     | Decompression fasciotomy, leg; posterior compartment(s) only                                                                                                                                          | Decompression fasciotomy of lower extremity              |
| 27600     | Decompression fasciotomy, leg; anterior and/or lateral compartments only                                                                                                                              | Decompression fasciotomy of lower extremity              |
| 27499     | Decompression fasciotomy, thigh and/or knee, multiple compartments; with debridement of nonviable muscle and/or nerve                                                                                 | Decompression fasciotomy of lower extremity              |
| 27497     | Decompression fasciotomy, thigh and/or knee, 1 compartment (flexor or extensor or adductor); with debridement of nonviable muscle and/or nerve                                                        | Decompression fasciotomy of lower extremity              |
| 25025     | Decompression fasciotomy, forearm and/or wrist, flexor AND extensor compartment; with debridement of nonviable muscle and/or nerve                                                                    | Decompression fasciotomy of upper extremity              |
| 25020     | Decompression fasciotomy, forearm and/or wrist, flexor OR extensor compartment; without debridement of nonviable muscle and/or nerve                                                                  | Decompression fasciotomy of upper extremity              |
| 24495     | Decompression fasciotomy, forearm, with brachial artery exploration                                                                                                                                   | Decompression fasciotomy of upper extremity              |
| 27893     | Decompression fasciotomy, leg; posterior compartment(s) only, with debridement of nonviable muscle and/or nerve                                                                                       | Decompression fasciotomy of upper extremity              |
| 25023     | Decompression fasciotomy, forearm and/or wrist, flexor OR extensor compartment; with debridement of nonviable muscle and/or nerve                                                                     | Decompression fasciotomy of upper extremity              |
| 25024     | Decompression fasciotomy, forearm and/or wrist, flexor AND extensor compartment; without debridement of nonviable muscle and/or nerve                                                                 | Decompression fasciotomy of upper extremity              |

| Continued |                                                                                                                                                                                                                  |                                                                                             |
|-----------|------------------------------------------------------------------------------------------------------------------------------------------------------------------------------------------------------------------|---------------------------------------------------------------------------------------------|
| Code      | Code description                                                                                                                                                                                                 | Procedure type                                                                              |
| 26037     | Decompressive fasciotomy, hand (excludes 26035)                                                                                                                                                                  | Decompression fasciotomy of upper extremity                                                 |
| 26035     | Decompression fingers and/or hand, injection injury (eg, grease gun)                                                                                                                                             | Decompression fasciotomy of upper extremity                                                 |
| 27496     | Decompression fasciotomy, thigh and/or knee, 1 compartment (flexor or extensor or adductor);                                                                                                                     | Decompression fasciotomy of upper extremity                                                 |
| 27498     | Decompression fasciotomy, thigh and/or knee, multiple compartments;                                                                                                                                              | Decompression fasciotomy of upper extremity                                                 |
| 69960     | Decompression internal auditory canal                                                                                                                                                                            | Decompression of internal auditory canal                                                    |
| 61330     | Decompression of orbit only, transcranial approach                                                                                                                                                               | Decompression of orbit only, transcranial approach                                          |
| 50940     | Deligation of ureter                                                                                                                                                                                             | Deligation of ureter                                                                        |
| 27035     | Denervation, hip joint, intrapelvic or extrapelvic intra-articular branches of sciatic, femoral, or obturator nerves                                                                                             | Denervation of hip joint                                                                    |
| 46924     | Destruction of lesion(s), anus (eg, condyloma, papilloma, molluscum contagiosum, herpetic vesicle), extensive (eg, laser surgery, electrosurgery, cryosurgery, chemosurgery)                                     | Destruction of lesion(s), anus                                                              |
| 67220     | Destruction of localized lesion of choroid (eg, choroidal neovascularization); photocoagulation (eg, laser), 1 or more sessions                                                                                  | Destruction of localized lesion of retina                                                   |
| 67218     | Destruction of localized lesion of retina (eg, macular edema, tumors), 1 or more sessions; radiation by implantation of source (includes removal of source)                                                      | Destruction of localized lesion of retina                                                   |
| 67210     | Destruction of localized lesion of retina (eg, macular edema, tumors), 1 or more sessions; photocoagulation                                                                                                      | Destruction of localized lesion of retina                                                   |
| 67208     | Destruction of localized lesion of retina (eg, macular edema, tumors), 1 or more sessions; cryotherapy, diathermy                                                                                                | Destruction of localized lesion of retina                                                   |
| 39503     | Repair, neonatal diaphragmatic hernia, with or without chest tube insertion and with or without creation of ventral hernia                                                                                       | Diaphragmatic hernia repair (neonatal)                                                      |
| 39541     | Repair, diaphragmatic hernia (other than neonatal), traumatic; chronic                                                                                                                                           | Diaphragmatic hernia repair (other than neonatal)                                           |
| 39540     | Repair, diaphragmatic hernia (other than neonatal), traumatic; acute                                                                                                                                             | Diaphragmatic hernia repair (other than neonatal)                                           |
| 39501     | Repair, laceration of diaphragm, any approach                                                                                                                                                                    | Diaphragmatic repair                                                                        |
| 33645     | Direct or patch closure, sinus venosus, with or without anomalous pulmonary venous drainage                                                                                                                      | Direct or patch closure, sinus venosus, with or without anomalous pulmonary venous drainage |
| 35152     | Direct repair of aneurysm, pseudoaneurysm, or excision (partial or total) and graft insertion, with or without patch graft; for ruptured aneurysm, popliteal artery                                              | Direct repair of aneurysm, pseudoaneurysm, or excision, lower extremity                     |
| 35151     | Direct repair of aneurysm, pseudoaneurysm, or excision (partial or total) and graft insertion, with or without patch graft; for aneurysm, pseudoaneurysm, and associated occlusive disease, popliteal artery     | Direct repair of aneurysm, pseudoaneurysm, or excision, lower extremity                     |
| 35142     | Direct repair of aneurysm, pseudoaneurysm, or excision (partial or total) and graft insertion, with or without patch graft; for ruptured aneurysm, common femoral artery (profunda femoris, superficial femoral) | Direct repair of aneurysm, pseudoaneurysm, or excision, lower extremity                     |
| 23921     | Disarticulation of shoulder; secondary closure or scar revision                                                                                                                                                  | Disarticulation of shoulder                                                                 |
| 23920     | Disarticulation of shoulder;                                                                                                                                                                                     | Disarticulation of shoulder                                                                 |
| 25924     | Disarticulation through wrist; re-amputation                                                                                                                                                                     | Disarticulation through wrist                                                               |
| 25922     | Disarticulation through wrist; secondary closure or scar revision                                                                                                                                                | Disarticulation through wrist                                                               |
| 25920     | Disarticulation through wrist;                                                                                                                                                                                   | Disarticulation through wrist                                                               |
| 66820     | Discission of secondary membranous cataract (opacified posterior lens capsule and/or anterior hyaloid); stab incision technique (Ziegler or Wheeler knife)                                                       | Discission of secondary membranous cataract                                                 |
| 67030     | Discission of vitreous strands (without removal), pars plana approach                                                                                                                                            | Discission of vitreous strands (without removal), pars plana approach                       |
| 43130     | Diverticulectomy of hypopharynx or esophagus, with or without myotomy; cervical approach                                                                                                                         | Diverticulectomy of hypopharynx or esophagus                                                |
| 43135     | Diverticulectomy of hypopharynx or esophagus, with or without myotomy; thoracic approach                                                                                                                         | Diverticulectomy of hypopharynx or esophagus                                                |

| Continued |                                                                                                                                                                                                                                                      |                                                                    |
|-----------|------------------------------------------------------------------------------------------------------------------------------------------------------------------------------------------------------------------------------------------------------|--------------------------------------------------------------------|
| Code      | Code description                                                                                                                                                                                                                                     | Procedure type                                                     |
| 33802     | Division of aberrant vessel (vascular ring);                                                                                                                                                                                                         | Division of aberrant vessel (vascular ring)                        |
| 33803     | Division of aberrant vessel (vascular ring); with reanastomosis                                                                                                                                                                                      | Division of aberrant vessel (vascular ring)                        |
| 28250     | Division of plantar fascia and muscle (eg, Steindler stripping) (separate procedure)                                                                                                                                                                 | Division of plantar fascia and muscle                              |
| 21700     | Division of scalenus anticus; without resection of cervical rib                                                                                                                                                                                      | Division of scalenus anticus                                       |
| 21705     | Division of scalenus anticus; with resection of cervical rib                                                                                                                                                                                         | Division of scalenus anticus                                       |
| 21725     | Division of sternocleidomastoid for torticollis - open operation; with cast application                                                                                                                                                              | Division of sternocleidomastoid                                    |
| 21720     | Division of sternocleidomastoid for torticollis - open operation; without cast application                                                                                                                                                           | Division of sternocleidomastoid                                    |
| 45150     | Division of stricture of rectum                                                                                                                                                                                                                      | Division of stricture of rectum                                    |
| 68371     | Harvesting conjunctival allograft, living donor                                                                                                                                                                                                      | Donor procedure, Harvesting conjunctival allograft, living donor   |
| 19020     | Mastotomy with exploration or drainage of abscess, deep                                                                                                                                                                                              | Drainage of breast abscess                                         |
| 49062     | Drainage of extraperitoneal lymphocele to peritoneal cavity - open                                                                                                                                                                                   | Drainage of extraperitoneal lymphocele to peritoneal cavity - open |
| 58822     | Drainage of ovarian abscess; abdominal approach                                                                                                                                                                                                      | Drainage of ovarian abscess                                        |
| 58820     | Drainage of ovarian abscess; vaginal approach - open                                                                                                                                                                                                 | Drainage of ovarian abscess                                        |
| 58805     | Drainage of ovarian cyst(s), unilateral or bilateral (separate procedure); abdominal approach                                                                                                                                                        | Drainage of ovarian cyst(s), abdominal approach                    |
| 58823     | Drainage of pelvic abscess, transvaginal or transrectal approach, percutaneous (eg, ovarian, pericolic)                                                                                                                                              | Drainage of pelvic abscess - percutaneous                          |
| 50020     | Drainage of perirenal or renal abscess - open                                                                                                                                                                                                        | Drainage of perirenal or renal abscess - open                      |
| 49020     | Drainage of peritoneal abscess or localized peritonitis, exclusive of appendiceal abscess - open                                                                                                                                                     | Drainage of peritoneal abscess - open                              |
| 49021     | Drainage of peritoneal abscess or localized peritonitis, exclusive of appendiceal abscess; percutaneous                                                                                                                                              | Drainage of peritoneal abscess - percutaneous                      |
| 49060     | Drainage of retroperitoneal abscess - open                                                                                                                                                                                                           | Drainage of retroperitoneal abscess - open                         |
| 49061     | Drainage of retroperitoneal abscess; percutaneous                                                                                                                                                                                                    | Drainage of retroperitoneal abscess - percutaneous                 |
| 42305     | Drainage of abscess; parotid, complicated                                                                                                                                                                                                            | Drainage of salivary gland abscess                                 |
| 49040     | Drainage of subdiaphragmatic or subphrenic abscess - open                                                                                                                                                                                            | Drainage of subdiaphragmatic or subphrenic abscess - open          |
| 49041     | Drainage of subdiaphragmatic or subphrenic abscess; percutaneous                                                                                                                                                                                     | Drainage of subdiaphragmatic or subphrenic abscess - percutaneous  |
| 48547     | Duodenal exclusion with gastrojejunostomy for pancreatic injury                                                                                                                                                                                      | Duodenal exclusion with gastrojejunostomy for pancreatic injury    |
| 44010     | Duodenotomy, for exploration, biopsy(s), or foreign body removal                                                                                                                                                                                     | Duodenotomy                                                        |
| 63710     | Dural graft, spinal                                                                                                                                                                                                                                  | Dural graft, spinal                                                |
| 36823     | Insertion of arterial and venous cannula(s) for isolated extracorporeal circulation including regional chemotherapy perfusion to an extremity, with or without hyperthermia, with removal of cannula(s) and repair of arteriotomy and venotomy sites | ECMO                                                               |
| 36822     | Insertion of cannula(s) for prolonged extracorporeal circulation for cardiopulmonary insufficiency (ECMO) (separate procedure)                                                                                                                       | ECMO                                                               |
| 33989     | Removal of left heart vent by thoracic incision (eg, sternotomy, thoracotomy) for ECMO/ECLS                                                                                                                                                          | ECMO                                                               |
| 33988     | Insertion of left heart vent by thoracic incision (eg, sternotomy, thoracotomy) for ECMO/ECLS                                                                                                                                                        | ECMO                                                               |
| 33986     | Extracorporeal membrane oxygenation (ECMO)/extracorporeal life support (ECLS) provided by physician; removal of central cannula(e) by sternotomy or thoracotomy, 6 years and older                                                                   | ECMO                                                               |
| 33985     | Extracorporeal membrane oxygenation (ECMO)/extracorporeal life support (ECLS) provided by physician; removal of central cannula(e) by sternotomy or thoracotomy, birth through 5 years of age                                                        | ECMO                                                               |
| 33984     | Extracorporeal membrane oxygenation (ECMO)/extracorporeal life support (ECLS) provided by physician; removal of peripheral (arterial and/or venous) cannula(e) - open, 6 years and older                                                             | ECMO                                                               |
| 33969     | Extracorporeal membrane oxygenation (ECMO)/extracorporeal life support (ECLS) provided by physician; removal of peripheral (arterial and/or venous) cannula(e) - open, birth through 5 years of age                                                  | ECMO                                                               |
| 33964     | Extracorporeal membrane oxygenation (ECMO)/extracorporeal life support (ECLS) provided by physician; reposition central cannula(e) by sternotomy or thoracotomy, 6 years and older (includes fluoroscopic guidance, when performed)                  | ECMO                                                               |

| Continued |                                                                                                                                                                                                                                                      |                                       |
|-----------|------------------------------------------------------------------------------------------------------------------------------------------------------------------------------------------------------------------------------------------------------|---------------------------------------|
| Code      | Code description                                                                                                                                                                                                                                     | Procedure type                        |
| 33963     | Extracorporeal membrane oxygenation (ECMO)/extracorporeal life support (ECLS) provided by physician; reposition of central cannula(e) by sternotomy or thoracotomy, birth through 5 years of age (includes fluoroscopic guidance, when performed)    | ECMO                                  |
| 33962     | Extracorporeal membrane oxygenation (ECMO)/extracorporeal life support (ECLS) provided by physician; reposition peripheral (arterial and/or venous) cannula(e) - open, 6 years and older (includes fluoroscopic guidance, when performed)            | ECMO                                  |
| 33959     | Extracorporeal membrane oxygenation (ECMO)/extracorporeal life support (ECLS) provided by physician; reposition peripheral (arterial and/or venous) cannula(e) - open, birth through 5 years of age (includes fluoroscopic guidance, when performed) | ECMO                                  |
| 33956     | Extracorporeal membrane oxygenation (ECMO)/extracorporeal life support (ECLS) provided by physician; insertion of central cannula(e) by sternotomy or thoracotomy, 6 years and older                                                                 | ECMO                                  |
| 33955     | Extracorporeal membrane oxygenation (ECMO)/extracorporeal life support (ECLS) provided by physician; insertion of central cannula(e) by sternotomy or thoracotomy, birth through 5 years of age                                                      | ECMO                                  |
| 33954     | Extracorporeal membrane oxygenation (ECMO)/extracorporeal life support (ECLS) provided by physician; insertion of peripheral (arterial and/or venous) cannula(e) - open, 6 years and older                                                           | ECMO                                  |
| 33953     | Extracorporeal membrane oxygenation (ECMO)/extracorporeal life support (ECLS) provided by physician; insertion of peripheral (arterial and/or venous) cannula(e) - open, birth through 5 years of age                                                | ECMO                                  |
| 59151     | Laparoscopic treatment of ectopic pregnancy; with salpingectomy and/or oophorectomy                                                                                                                                                                  | Ectopic pregnancy surgery             |
| 59150     | Laparoscopic treatment of ectopic pregnancy; without salpingectomy and/or oophorectomy                                                                                                                                                               | Ectopic pregnancy surgery             |
| 59140     | Surgical treatment of ectopic pregnancy; cervical, with evacuation                                                                                                                                                                                   | Ectopic pregnancy surgery             |
| 59136     | Surgical treatment of ectopic pregnancy; interstitial, uterine pregnancy with partial resection of uterus                                                                                                                                            | Ectopic pregnancy surgery             |
| 59135     | Surgical treatment of ectopic pregnancy; interstitial, uterine pregnancy requiring total hysterectomy                                                                                                                                                | Ectopic pregnancy surgery             |
| 59130     | Surgical treatment of ectopic pregnancy; abdominal pregnancy                                                                                                                                                                                         | Ectopic pregnancy surgery             |
| 59121     | Surgical treatment of ectopic pregnancy; tubal or ovarian, without salpingectomy and/or oophorectomy                                                                                                                                                 | Ectopic pregnancy surgery             |
| 59120     | Surgical treatment of ectopic pregnancy; tubal or ovarian, requiring salpingectomy and/or oophorectomy, abdominal or vaginal approach                                                                                                                | Ectopic pregnancy surgery             |
| 24346     | Reconstruction medial collateral ligament, elbow, with tendon graft (includes harvesting of graft)                                                                                                                                                   | Elbow ligament reconstruction         |
| 24345     | Repair medial collateral ligament, elbow, with local tissue                                                                                                                                                                                          | Elbow ligament reconstruction         |
| 24344     | Reconstruction lateral collateral ligament, elbow, with tendon graft (includes harvesting of graft)                                                                                                                                                  | Elbow ligament reconstruction         |
| 24343     | Repair lateral collateral ligament, elbow, with local tissue                                                                                                                                                                                         | Elbow ligament reconstruction         |
| 62000     | Elevation of depressed skull fracture; simple, extradural                                                                                                                                                                                            | Elevation of depressed skull fracture |
| 62010     | Elevation of depressed skull fracture; with repair of dura and/or debridement of brain                                                                                                                                                               | Elevation of depressed skull fracture |
| 62005     | Elevation of depressed skull fracture; compound or comminuted, extradural                                                                                                                                                                            | Elevation of depressed skull fracture |
| 34101     | Embolectomy or thrombectomy, with or without catheter; axillary, brachial, innominate, subclavian artery, by arm incision                                                                                                                            | Embolectomy or thrombectomy           |
| 34001     | Embolectomy or thrombectomy, with or without catheter; carotid, subclavian or innominate artery, by neck incision                                                                                                                                    | Embolectomy or thrombectomy           |
| 34201     | Embolectomy or thrombectomy, with or without catheter; femoropopliteal, aortoiliac artery, by leg incision                                                                                                                                           | Embolectomy or thrombectomy           |
| 34051     | Embolectomy or thrombectomy, with or without catheter; innominate, subclavian artery, by thoracic incision                                                                                                                                           | Embolectomy or thrombectomy           |
| 34203     | Embolectomy or thrombectomy, with or without catheter; popliteal-tibio- peroneal artery, by leg incision                                                                                                                                             | Embolectomy or thrombectomy           |
| 34111     | Embolectomy or thrombectomy, with or without catheter; radial or ulnar artery, by arm incision                                                                                                                                                       | Embolectomy or thrombectomy           |
| 34151     | Embolectomy or thrombectomy, with or without catheter; renal, celiac, mesentery, aortoiliac artery, by abdominal incision                                                                                                                            | Embolectomy or thrombectomy           |
| 58974     | Embryo transfer, intrauterine                                                                                                                                                                                                                        | Embryo transfer, intrauterine         |
| 69806     | Endolymphatic sac operation; with shunt                                                                                                                                                                                                              | Endolymphatic sac operation           |
| 69805     | Endolymphatic sac operation; without shunt                                                                                                                                                                                                           | Endolymphatic sac operation           |

| Continued |                                                                                                                                                                                                                                                                                                                                                                                                                                                                                                                                                                                                                                                                                                        |                                                               |
|-----------|--------------------------------------------------------------------------------------------------------------------------------------------------------------------------------------------------------------------------------------------------------------------------------------------------------------------------------------------------------------------------------------------------------------------------------------------------------------------------------------------------------------------------------------------------------------------------------------------------------------------------------------------------------------------------------------------------------|---------------------------------------------------------------|
| Code      | Code description                                                                                                                                                                                                                                                                                                                                                                                                                                                                                                                                                                                                                                                                                       | Procedure type                                                |
| 29893     | Endoscopic plantar fasciotomy                                                                                                                                                                                                                                                                                                                                                                                                                                                                                                                                                                                                                                                                          | Endoscopic plantar fasciotomy                                 |
| 34834     | Open brachial artery exposure to assist in the deployment of aortic or iliac endovascular prosthesis by arm incision, unilateral                                                                                                                                                                                                                                                                                                                                                                                                                                                                                                                                                                       | Endovascular access                                           |
| 34833     | Open iliac artery exposure with creation of conduit for delivery of aortic or iliac endovascular prosthesis, by abdominal or retroperitoneal incision, unilateral                                                                                                                                                                                                                                                                                                                                                                                                                                                                                                                                      | Endovascular access                                           |
| 34820     | Open iliac artery exposure for delivery of endovascular prosthesis or iliac occlusion during endovascular therapy, by abdominal or retroperitoneal incision, unilateral                                                                                                                                                                                                                                                                                                                                                                                                                                                                                                                                | Endovascular access                                           |
| 34812     | Open femoral artery exposure for delivery of endovascular prosthesis, by groin incision, unilateral                                                                                                                                                                                                                                                                                                                                                                                                                                                                                                                                                                                                    | Endovascular access                                           |
| 33366     | Transcatheter aortic valve replacement (TAVR/TAVI) with prosthetic valve; transapical exposure (eg, left thoracotomy)                                                                                                                                                                                                                                                                                                                                                                                                                                                                                                                                                                                  | Endovascular aortic valve replacement                         |
| 33365     | Transcatheter aortic valve replacement (TAVR/TAVI) with prosthetic valve; transaortic approach (eg, median sternotomy, mediastinotomy)                                                                                                                                                                                                                                                                                                                                                                                                                                                                                                                                                                 | Endovascular aortic valve replacement                         |
| 33364     | Transcatheter aortic valve replacement (TAVR/TAVI) with prosthetic valve; open iliac artery approach                                                                                                                                                                                                                                                                                                                                                                                                                                                                                                                                                                                                   | Endovascular aortic valve replacement                         |
| 33363     | Transcatheter aortic valve replacement (TAVR/TAVI) with prosthetic valve; open axillary artery approach                                                                                                                                                                                                                                                                                                                                                                                                                                                                                                                                                                                                | Endovascular aortic valve replacement                         |
| 33362     | Transcatheter aortic valve replacement (TAVR/TAVI) with prosthetic valve; open femoral artery approach                                                                                                                                                                                                                                                                                                                                                                                                                                                                                                                                                                                                 | Endovascular aortic valve replacement                         |
| 33361     | Transcatheter aortic valve replacement (TAVR/TAVI) with prosthetic valve; percutaneous femoral artery approach                                                                                                                                                                                                                                                                                                                                                                                                                                                                                                                                                                                         | Endovascular aortic valve replacement                         |
| 34900     | Endovascular repair of iliac artery (eg, aneurysm, pseudoaneurysm, arteriovenous malformation, trauma) using ilio-iliac tube endoprosthesis                                                                                                                                                                                                                                                                                                                                                                                                                                                                                                                                                            | Endovascular repair of iliac artery                           |
| 34718     | Endovascular repair of iliac artery, not associated with placement of an aorto iliac artery endograft at the same session, by deployment of an iliac branched endograft, including pre-procedure sizing and device selection, all ipsilateral selective iliac artery catheterization(s), all associated radiological supervision and interpretation, and all endograft extension(s) proximally to the aortic bifurcation and distally in the internal iliac, external iliac, and common femoral artery(ies), and treatment zone angioplasty/stenting, when performed, for other than rupture (eg, for aneurysm, pseudoaneurysm, dissection, arteriovenous malformation, penetrating ulcer), unilateral | Endovascular repair of iliac artery                           |
| 34708     | Endovascular repair of iliac artery by deployment of an ilio-iliac tube endograft including pre-procedure sizing and device selection, all nonselective catheterization(s), all associated radiological supervision and interpretation, and all endograft extension(s) proximally to the aortic bifurcation and distally to the iliac bifurcation, and treatment zone angioplasty/stenting, when performed, unilateral; for rupture including temporary aortic and/or iliac balloon occlusion, when performed (eg, for aneurysm, pseudoaneurysm, dissection, arteriovenous malformation, traumatic disruption)                                                                                         | Endovascular repair of iliac artery                           |
| 34707     | Endovascular repair of iliac artery by deployment of an ilio-iliac tube endograft including pre-procedure sizing and device selection, all nonselective catheterization(s), all associated radiological supervision and interpretation, and all endograft extension(s) proximally to the aortic bifurcation and distally to the iliac bifurcation, and treatment zone angioplasty/stenting, when performed, unilateral; for other than rupture (eg, for aneurysm, pseudoaneurysm, dissection, arteriovenous malformation)                                                                                                                                                                              | Endovascular repair of iliac artery                           |
| 51960     | Enterocystoplasty, including intestinal anastomosis                                                                                                                                                                                                                                                                                                                                                                                                                                                                                                                                                                                                                                                    | Enterocystoplasty, including intestinal anastomosis           |
| 44180     | Laparoscopy, surgical, enterolysis (freeing of intestinal adhesion) (separate procedure)                                                                                                                                                                                                                                                                                                                                                                                                                                                                                                                                                                                                               | Enterolysis - laparoscopic                                    |
| 44005     | Enterolysis (freeing of intestinal adhesion) (separate procedure)                                                                                                                                                                                                                                                                                                                                                                                                                                                                                                                                                                                                                                      | Enterolysis - open                                            |
| 44021     | Enterotomy, small intestine, other than duodenum; for decompression (eg, Baker tube)                                                                                                                                                                                                                                                                                                                                                                                                                                                                                                                                                                                                                   | Enterotomy                                                    |
| 44020     | Enterotomy, small intestine, other than duodenum; for exploration, biopsy(s), or foreign body removal                                                                                                                                                                                                                                                                                                                                                                                                                                                                                                                                                                                                  | Enterotomy                                                    |
| 65105     | Enucleation of eye; with implant, muscles attached to implant                                                                                                                                                                                                                                                                                                                                                                                                                                                                                                                                                                                                                                          | Enucleation of eye                                            |
| 65103     | Enucleation of eye; with implant, muscles not attached to implant                                                                                                                                                                                                                                                                                                                                                                                                                                                                                                                                                                                                                                      | Enucleation of eye                                            |
| 65101     | Enucleation of eye; without implant                                                                                                                                                                                                                                                                                                                                                                                                                                                                                                                                                                                                                                                                    | Enucleation of eye                                            |
| 54861     | Epididymectomy; bilateral                                                                                                                                                                                                                                                                                                                                                                                                                                                                                                                                                                                                                                                                              | Epididymectomy                                                |
| 54860     | Epididymectomy; unilateral                                                                                                                                                                                                                                                                                                                                                                                                                                                                                                                                                                                                                                                                             | Epididymectomy                                                |
| 54901     | Epididymovasostomy, anastomosis of epididymis to vas deferens; bilateral                                                                                                                                                                                                                                                                                                                                                                                                                                                                                                                                                                                                                               | Epididymovasostomy, anastomosis of epididymis to vas deferens |

| Continued |                                                                                                                                                                                                                                                                                                                                                                                                                                  |                                                                              |
|-----------|----------------------------------------------------------------------------------------------------------------------------------------------------------------------------------------------------------------------------------------------------------------------------------------------------------------------------------------------------------------------------------------------------------------------------------|------------------------------------------------------------------------------|
| Code      | Code description                                                                                                                                                                                                                                                                                                                                                                                                                 | Procedure type                                                               |
| 54900     | Epididymovasostomy, anastomosis of epididymis to vas deferens; unilateral                                                                                                                                                                                                                                                                                                                                                        | Epididymovasostomy, anastomosis of epididymis to vas deferens                |
| 31420     | Epiglottidectomy                                                                                                                                                                                                                                                                                                                                                                                                                 | Epiglottidectomy                                                             |
| 65767     | Epikeratoplasty                                                                                                                                                                                                                                                                                                                                                                                                                  | Epikeratoplasty                                                              |
| 27185     | Epiphyseal arrest by epiphysiodesis or stapling, greater trochanter of femur                                                                                                                                                                                                                                                                                                                                                     | Epiphyseal arrest by epiphysiodesis or stapling, greater trochanter of femur |
| 25455     | Epiphyseal arrest by epiphysiodesis or stapling; distal radius AND ulna                                                                                                                                                                                                                                                                                                                                                          | Epiphyseal arrest by epiphysiodesis or stapling; distal radius and/or ulna   |
| 25450     | Epiphyseal arrest by epiphysiodesis or stapling; distal radius OR ulna                                                                                                                                                                                                                                                                                                                                                           | Epiphyseal arrest by epiphysiodesis or stapling; distal radius and/or ulna   |
| 27732     | Arrest, epiphyseal (epiphysiodesis) - open; distal fibula                                                                                                                                                                                                                                                                                                                                                                        | Epiphyseal or hemiepiphyseal arrest, lower extremity                         |
| 27730     | Arrest, epiphyseal (epiphysiodesis) - open; distal tibia                                                                                                                                                                                                                                                                                                                                                                         | Epiphyseal or hemiepiphyseal arrest, lower extremity                         |
| 27740     | Arrest, epiphyseal (epiphysiodesis), any method, combined, proximal and distal tibia and fibula;                                                                                                                                                                                                                                                                                                                                 | Epiphyseal or hemiepiphyseal arrest, lower extremity                         |
| 27479     | Arrest, epiphyseal, any method (eg, epiphysiodesis); combined distal femur, proximal tibia and fibula                                                                                                                                                                                                                                                                                                                            | Epiphyseal or hemiepiphyseal arrest, lower extremity                         |
| 27485     | Arrest, hemiepiphyseal, distal femur or proximal tibia or fibula (eg, genu varus or valgus)                                                                                                                                                                                                                                                                                                                                      | Epiphyseal or hemiepiphyseal arrest, lower extremity                         |
| 27742     | Arrest, epiphyseal (epiphysiodesis), any method, combined, proximal and distal tibia and fibula; and distal femur                                                                                                                                                                                                                                                                                                                | Epiphyseal or hemiepiphyseal arrest, lower extremity                         |
| 27477     | Arrest, epiphyseal, any method (eg, epiphysiodesis); tibia and fibula, proximal                                                                                                                                                                                                                                                                                                                                                  | Epiphyseal or hemiepiphyseal arrest, lower extremity                         |
| 27475     | Arrest, epiphyseal, any method (eg, epiphysiodesis); distal femur                                                                                                                                                                                                                                                                                                                                                                | Epiphyseal or hemiepiphyseal arrest, lower extremity                         |
| 27734     | Arrest, epiphyseal (epiphysiodesis) - open; distal tibia and fibula                                                                                                                                                                                                                                                                                                                                                              | Epiphyseal or hemiepiphyseal arrest, lower extremity                         |
| 24470     | Hemiepiphyseal arrest (eg, cubitus varus or valgus, distal humerus)                                                                                                                                                                                                                                                                                                                                                              | Epiphyseal or hemiepiphyseal arrest, upper extremity                         |
| 43325     | Esophagogastric fundoplasty; with fundic patch (Thal-Nissen procedure)                                                                                                                                                                                                                                                                                                                                                           | Esophagogastric fundoplasty                                                  |
| 43327     | Esophagogastric fundoplasty partial or complete; laparotomy                                                                                                                                                                                                                                                                                                                                                                      | Esophagogastric fundoplasty                                                  |
| 43328     | Esophagogastric fundoplasty partial or complete; thoracotomy                                                                                                                                                                                                                                                                                                                                                                     | Esophagogastric fundoplasty                                                  |
| 43116     | Partial esophagectomy, cervical, with free intestinal graft, including microvascular anastomosis, obtaining the graft and intestinal reconstruction                                                                                                                                                                                                                                                                              | Esophagectomy                                                                |
| 43287     | Esophagectomy, distal two-thirds, with laparoscopic mobilization of the abdominal and lower mediastinal esophagus and proximal gastrectomy, with laparoscopic pyloric drainage procedure if performed, with separate thoracoscopic mobilization of the middle and upper mediastinal esophagus and thoracic esophagogastrostomy (ie - laparoscopic thoracoscopic esophagectomy, Ivor Lewis esophagectomy)                         | Esophagectomy                                                                |
| 43286     | Esophagectomy, total or near total, with laparoscopic mobilization of the abdominal and mediastinal esophagus and proximal gastrectomy, with laparoscopic pyloric drainage procedure if performed, with open cervical pharyngogastrostomy or esophagogastrostomy (ie - laparoscopic transhiatal esophagectomy)                                                                                                                   | Esophagectomy                                                                |
| 43123     | Partial esophagectomy, thoracoabdominal or abdominal approach, with or without proximal gastrectomy; with colon interposition or small intestine reconstruction, including intestine mobilization, preparation, and anastomosis(es)                                                                                                                                                                                              | Esophagectomy                                                                |
| 43122     | Partial esophagectomy, thoracoabdominal or abdominal approach, with or without proximal gastrectomy; with esophagogastrostomy, with or without pyloroplasty                                                                                                                                                                                                                                                                      | Esophagectomy                                                                |
| 43288     | Esophagectomy, total or near total, with thoracoscopic mobilization of the upper, middle, and lower mediastinal esophagus, with separate laparoscopic proximal gastrectomy, with laparoscopic pyloric drainage procedure if performed, with open cervical pharyngogastrostomy or esophagogastrostomy (ie, thoracoscopic - laparoscopic and cervical incision esophagectomy, McKeown esophagectomy, tri-incisional esophagectomy) | Esophagectomy                                                                |
| 43121     | Partial esophagectomy, distal 2/3, with thoracotomy only, with or without proximal gastrectomy, with thoracic esophagogastrostomy, with or without pyloroplasty                                                                                                                                                                                                                                                                  | Esophagectomy                                                                |

| Continued |                                                                                                                                                                                                                                                           |                                       |
|-----------|-----------------------------------------------------------------------------------------------------------------------------------------------------------------------------------------------------------------------------------------------------------|---------------------------------------|
| Code      | Code description                                                                                                                                                                                                                                          | Procedure type                        |
| 43117     | Partial esophagectomy, distal 2/3, with thoracotomy and separate abdominal incision, with or without proximal gastrectomy; with thoracic esophagogastrostomy, with or without pyloroplasty (Ivor Lewis)                                                   | Esophagectomy                         |
| 43112     | Total or near total esophagectomy, with thoracotomy; with pharyngogastrostomy or cervical esophagogastrostomy, with or without pyloroplasty                                                                                                               | Esophagectomy                         |
| 43118     | Partial esophagectomy, distal 2/3, with thoracotomy and separate abdominal incision, with or without proximal gastrectomy; with colon interposition or small intestine reconstruction, including intestine mobilization, preparation, and anastomosis(es) | Esophagectomy                         |
| 43113     | Total or near total esophagectomy, with thoracotomy; with colon interposition or small intestine reconstruction, including intestine mobilization, preparation, and anastomosis(es)                                                                       | Esophagectomy                         |
| 43107     | Total or near total esophagectomy, without thoracotomy; with pharyngogastrostomy or cervical esophagogastrostomy, with or without pyloroplasty (transhiatal)                                                                                              | Esophagectomy                         |
| 43108     | Total or near total esophagectomy, without thoracotomy; with colon interposition or small intestine reconstruction, including intestine mobilization, preparation and anastomosis(es)                                                                     | Esophagectomy                         |
| 43124     | Total or partial esophagectomy, without reconstruction (any approach), with cervical esophagostomy                                                                                                                                                        | Esophagectomy                         |
| 43320     | Esophagogastrostomy (cardioplasty), with or without vagotomy and pyloroplasty, transabdominal or transthoracic approach                                                                                                                                   | Esophagogastrostomy                   |
| 43340     | Esophagojejunostomy (without total gastrectomy); abdominal approach                                                                                                                                                                                       | Esophagojejunostomy                   |
| 43341     | Esophagojejunostomy (without total gastrectomy); thoracic approach                                                                                                                                                                                        | Esophagojejunostomy                   |
| 43330     | Esophagomyotomy (Heller type); abdominal approach                                                                                                                                                                                                         | Esophagomyotomy                       |
| 43331     | Esophagomyotomy (Heller type); thoracic approach                                                                                                                                                                                                          | Esophagomyotomy                       |
| 43314     | Esophagoplasty for congenital defect (plastic repair or reconstruction), thoracic approach; with repair of congenital tracheoesophageal fistula                                                                                                           | Esophagoplasty                        |
| 43313     | Esophagoplasty for congenital defect (plastic repair or reconstruction), thoracic approach; without repair of congenital tracheoesophageal fistula                                                                                                        | Esophagoplasty                        |
| 43312     | Esophagoplasty (plastic repair or reconstruction), thoracic approach; with repair of tracheoesophageal fistula                                                                                                                                            | Esophagoplasty                        |
| 43310     | Esophagoplasty (plastic repair or reconstruction), thoracic approach; without repair of tracheoesophageal fistula                                                                                                                                         | Esophagoplasty                        |
| 43305     | Esophagoplasty (plastic repair or reconstruction), cervical approach; with repair of tracheoesophageal fistula                                                                                                                                            | Esophagoplasty                        |
| 43300     | Esophagoplasty (plastic repair or reconstruction), cervical approach; without repair of tracheoesophageal fistula                                                                                                                                         | Esophagoplasty                        |
| 43350     | Esophagostomy, fistulization of esophagus, external; abdominal approach                                                                                                                                                                                   | Esophagostomy                         |
| 43352     | Esophagostomy, fistulization of esophagus, external; cervical approach                                                                                                                                                                                    | Esophagostomy                         |
| 43351     | Esophagostomy, fistulization of esophagus, external; thoracic approach                                                                                                                                                                                    | Esophagostomy                         |
| 43020     | Esophagotomy, cervical approach, with removal of foreign body                                                                                                                                                                                             | Esophagostomy                         |
| 43045     | Esophagotomy, thoracic approach, with removal of foreign body                                                                                                                                                                                             | Esophagostomy                         |
| 31205     | Ethmoidectomy; extranasal, total                                                                                                                                                                                                                          | Ethmoidectomy                         |
| 31201     | Ethmoidectomy; intranasal, total                                                                                                                                                                                                                          | Ethmoidectomy                         |
| 31200     | Ethmoidectomy; intranasal, anterior                                                                                                                                                                                                                       | Ethmoidectomy                         |
| 65093     | Evisceration of ocular contents; with implant                                                                                                                                                                                                             | Evisceration of ocular contents       |
| 65091     | Evisceration of ocular contents; without implant                                                                                                                                                                                                          | Evisceration of ocular contents       |
| 66986     | Exchange of intraocular lens                                                                                                                                                                                                                              | Exchange of intraocular lens          |
| 67966     | Excision and repair of eyelid, involving lid margin, tarsus, conjunctiva, canthus, or full thickness, may include preparation for skin graft or pedicle flap with adjacent tissue transfer or rearrangement; over 1/4 of lid margin                       | Excision and repair of eyelid         |
| 67961     | Excision and repair of eyelid, involving lid margin, tarsus, conjunctiva, canthus, or full thickness, may include preparation for skin graft or pedicle flap with adjacent tissue transfer or rearrangement; up to 1/4 of lid margin                      | Excision and repair of eyelid         |
| 48148     | Excision of ampulla of Vater                                                                                                                                                                                                                              | Excision of ampulla of Vater          |
| 69552     | Excision aural glomus tumor; transmastoid                                                                                                                                                                                                                 | Excision of aural glomus tumor        |
| 69554     | Excision aural glomus tumor; extended (extratemporal)                                                                                                                                                                                                     | Excision of aural glomus tumor        |
| 56740     | Excision of Bartholin's gland or cyst                                                                                                                                                                                                                     | Excision of Bartholin's gland or cyst |
| 47712     | Excision of bile duct tumor; with or without primary repair of bile duct; intrahepatic                                                                                                                                                                    | Excision of bile duct tumor           |

| Continued |                                                                                                                                                                                            |                                                                     |
|-----------|--------------------------------------------------------------------------------------------------------------------------------------------------------------------------------------------|---------------------------------------------------------------------|
| Code      | Code description                                                                                                                                                                           | Procedure type                                                      |
| 47711     | Excision of bile duct tumor, with or without primary repair of bile duct; extrahepatic                                                                                                     | Excision of bile duct tumor                                         |
| 25136     | Excision or curettage of bone cyst or benign tumor of carpal bones; with allograft                                                                                                         | Excision of bone cyst or benign tumor with or without bone grafting |
| 25135     | Excision or curettage of bone cyst or benign tumor of carpal bones; with autograft (includes obtaining graft)                                                                              | Excision of bone cyst or benign tumor with or without bone grafting |
| 27357     | Excision or curettage of bone cyst or benign tumor of femur; with autograft (includes obtaining graft)                                                                                     | Excision of bone cyst or benign tumor with or without bone grafting |
| 27355     | Excision or curettage of bone cyst or benign tumor of femur;                                                                                                                               | Excision of bone cyst or benign tumor with or without bone grafting |
| 27356     | Excision or curettage of bone cyst or benign tumor of femur; with allograft                                                                                                                | Excision of bone cyst or benign tumor with or without bone grafting |
| 28108     | Excision or curettage of bone cyst or benign tumor, phalanges of foot                                                                                                                      | Excision of bone cyst or benign tumor with or without bone grafting |
| 28107     | Excision or curettage of bone cyst or benign tumor, tarsal or metatarsal, except talus or calcaneus; with allograft                                                                        | Excision of bone cyst or benign tumor with or without bone grafting |
| 28106     | Excision or curettage of bone cyst or benign tumor, tarsal or metatarsal, except talus or calcaneus; with iliac or other autograft (includes obtaining graft)                              | Excision of bone cyst or benign tumor with or without bone grafting |
| 28104     | Excision or curettage of bone cyst or benign tumor, tarsal or metatarsal, except talus or calcaneus;                                                                                       | Excision of bone cyst or benign tumor with or without bone grafting |
| 28103     | Excision or curettage of bone cyst or benign tumor, talus or calcaneus; with allograft                                                                                                     | Excision of bone cyst or benign tumor with or without bone grafting |
| 28102     | Excision or curettage of bone cyst or benign tumor, talus or calcaneus; with iliac or other autograft (includes obtaining graft)                                                           | Excision of bone cyst or benign tumor with or without bone grafting |
| 28100     | Excision or curettage of bone cyst or benign tumor, talus or calcaneus;                                                                                                                    | Excision of bone cyst or benign tumor with or without bone grafting |
| 26215     | Excision or curettage of bone cyst or benign tumor of proximal, middle, or distal phalanx of finger; with autograft (includes obtaining graft)                                             | Excision of bone cyst or benign tumor with or without bone grafting |
| 26210     | Excision or curettage of bone cyst or benign tumor of proximal, middle, or distal phalanx of finger;                                                                                       | Excision of bone cyst or benign tumor with or without bone grafting |
| 26205     | Excision or curettage of bone cyst or benign tumor of metacarpal; with autograft (includes obtaining graft)                                                                                | Excision of bone cyst or benign tumor with or without bone grafting |
| 26200     | Excision or curettage of bone cyst or benign tumor of metacarpal;                                                                                                                          | Excision of bone cyst or benign tumor with or without bone grafting |
| 27638     | Excision or curettage of bone cyst or benign tumor, tibia or fibula; with allograft                                                                                                        | Excision of bone cyst or benign tumor with or without bone grafting |
| 27637     | Excision or curettage of bone cyst or benign tumor, tibia or fibula; with autograft (includes obtaining graft)                                                                             | Excision of bone cyst or benign tumor with or without bone grafting |
| 27635     | Excision or curettage of bone cyst or benign tumor, tibia or fibula;                                                                                                                       | Excision of bone cyst or benign tumor with or without bone grafting |
| 27067     | Excision of bone cyst or benign tumor, wing of ilium, symphysis pubis, or greater trochanter of femur; with autograft requiring separate incision                                          | Excision of bone cyst or benign tumor with or without bone grafting |
| 27066     | Excision of bone cyst or benign tumor, wing of ilium, symphysis pubis, or greater trochanter of femur; deep (subfascial), includes autograft, when performed                               | Excision of bone cyst or benign tumor with or without bone grafting |
| 27065     | Excision of bone cyst or benign tumor, wing of ilium, symphysis pubis, or greater trochanter of femur; superficial, includes autograft, when performed                                     | Excision of bone cyst or benign tumor with or without bone grafting |
| 42815     | Excision branchial cleft cyst, vestige, or fistula, extending beneath subcutaneous tissues and/or into pharynx                                                                             | Excision of branchial cleft cyst, vestige, or fistula               |
| 19125     | Excision of breast lesion identified by preoperative placement of radiological marker - open; single lesion                                                                                | Excision of breast lesion                                           |
| 19120     | Excision of cyst, fibroadenoma, or other benign or malignant tumor, aberrant breast tissue, duct lesion, nipple or areolar lesion (except 19300) - open, male or female, 1 or more lesions | Excision of breast lesion                                           |
| 53250     | Excision of bulbourethral gland (Cowper's gland)                                                                                                                                           | Excision of bulbourethral gland (Cowper's gland)                    |
| 33120     | Excision of intracardiac tumor; resection with cardiopulmonary bypass                                                                                                                      | Excision of cardiac tumor with cardiopulmonary bypass               |

| Continued |                                                                                                                                                                                    |                                                                   |
|-----------|------------------------------------------------------------------------------------------------------------------------------------------------------------------------------------|-------------------------------------------------------------------|
| Code      | Code description                                                                                                                                                                   | Procedure type                                                    |
| 60605     | Excision of carotid body tumor; with excision of carotid artery                                                                                                                    | Excision of carotid body tumor                                    |
| 60600     | Excision of carotid body tumor; without excision of carotid artery                                                                                                                 | Excision of carotid body tumor                                    |
| 57545     | Excision of cervical stump, abdominal approach; with pelvic floor repair                                                                                                           | Excision of cervical stump                                        |
| 57540     | Excision of cervical stump, abdominal approach;                                                                                                                                    | Excision of cervical stump                                        |
| 57556     | Excision of cervical stump, vaginal approach; with repair of enterocele                                                                                                            | Excision of cervical stump                                        |
| 57555     | Excision of cervical stump, vaginal approach; with anterior and/or posterior repair                                                                                                | Excision of cervical stump                                        |
| 57550     | Excision of cervical stump, vaginal approach;                                                                                                                                      | Excision of cervical stump                                        |
| 19271     | Excision of chest wall tumor involving ribs, with plastic reconstruction; without mediastinal lymphadenectomy                                                                      | Excision of chest wall tumor, including ribs                      |
| 19272     | Excision of chest wall tumor involving ribs, with plastic reconstruction; with mediastinal lymphadenectomy                                                                         | Excision of chest wall tumor, including ribs                      |
| 19260     | Excision of chest wall tumor including ribs                                                                                                                                        | Excision of chest wall tumor, including ribs                      |
| 21603     | Excision of chest wall tumor involving rib(s), with plastic reconstruction; with mediastinal lymphadenectomy                                                                       | Excision of chest wall tumor, including ribs                      |
| 21602     | Excision of chest wall tumor involving rib(s), with plastic reconstruction; without mediastinal lymphadenectomy                                                                    | Excision of chest wall tumor, including ribs                      |
| 21601     | Excision of chest wall tumor including rib(s)                                                                                                                                      | Excision of chest wall tumor, including ribs                      |
| 47715     | Excision of choledochal cyst                                                                                                                                                       | Excision of choledochal cyst                                      |
| 33851     | Excision of coarctation of aorta, with or without associated patent ductus arteriosus; repair using either left subclavian artery or prosthetic material as gusset for enlargement | Excision of coarctation of aorta                                  |
| 33845     | Excision of coarctation of aorta, with or without associated patent ductus arteriosus; with graft                                                                                  | Excision of coarctation of aorta                                  |
| 33840     | Excision of coarctation of aorta, with or without associated patent ductus arteriosus; with direct anastomosis                                                                     | Excision of coarctation of aorta                                  |
| 60200     | Excision of cyst or adenoma of thyroid, or transection of isthmus                                                                                                                  | Excision of cyst or adenoma of thyroid, or transection of isthmus |
| 38555     | Excision of cystic hygroma, axillary or cervical; with deep neurovascular dissection                                                                                               | Excision of cystic hygroma                                        |
| 38550     | Excision of cystic hygroma, axillary or cervical; without deep neurovascular dissection                                                                                            | Excision of cystic hygroma                                        |
| 30125     | Excision dermoid cyst, nose; complex, under bone or cartilage                                                                                                                      | Excision of dermoid cyst, nose                                    |
| 25240     | Excision distal ulna partial or complete (eg, Darrach type or matched resection)                                                                                                   | Excision of distal ulna                                           |
| 20150     | Excision of epiphyseal bar, with or without autogenous soft tissue graft obtained through same fascial incision                                                                    | Excision of epiphyseal bar                                        |
| 15839     | Excision, excessive skin and subcutaneous tissue (includes lipectomy); other area                                                                                                  | Lipectomy, with or without excessive skin removal                 |
| 15835     | Excision, excessive skin and subcutaneous tissue (includes lipectomy); buttock                                                                                                     | Lipectomy, with or without excessive skin removal                 |
| 15834     | Excision, excessive skin and subcutaneous tissue (includes lipectomy); hip                                                                                                         | Lipectomy, with or without excessive skin removal                 |
| 15830     | Excision, excessive skin and subcutaneous tissue (includes lipectomy); abdomen, infraumbilical panniculectomy                                                                      | Lipectomy, with or without excessive skin removal                 |
| 15838     | Excision, excessive skin and subcutaneous tissue (includes lipectomy); submental fat pad                                                                                           | Lipectomy, with or without excessive skin removal                 |
| 15833     | Excision, excessive skin and subcutaneous tissue (includes lipectomy); leg                                                                                                         | Lipectomy, with or without excessive skin removal                 |
| 15832     | Excision, excessive skin and subcutaneous tissue (includes lipectomy); thigh                                                                                                       | Lipectomy, with or without excessive skin removal                 |
| 15837     | Excision, excessive skin and subcutaneous tissue (includes lipectomy); forearm or hand                                                                                             | Lipectomy, with or without excessive skin removal                 |
| 15836     | Excision, excessive skin and subcutaneous tissue (includes lipectomy); arm                                                                                                         | Lipectomy, with or without excessive skin removal                 |
| 69140     | Excision exostosis(es), external auditory canal                                                                                                                                    | Excision of exostosis(es), external auditory canal                |
| 69120     | Excision external ear; complete amputation                                                                                                                                         | Excision of external ear                                          |
| 54512     | Excision of extraparenchymal lesion of testis                                                                                                                                      | Excision of extraparenchymal lesion of testis                     |

| Continued |                                                                                                                                                           |                                                                 |
|-----------|-----------------------------------------------------------------------------------------------------------------------------------------------------------|-----------------------------------------------------------------|
| Code      | Code description                                                                                                                                          | Procedure type                                                  |
| 21049     | Excision of benign tumor or cyst of maxilla; requiring extra-oral osteotomy and partial maxillectomy (eg, locally aggressive or destructive lesion[s])    | Excision of facial bone or tumor/cyst in facial bone            |
| 21048     | Excision of benign tumor or cyst of maxilla; requiring intra-oral osteotomy (eg, locally aggressive or destructive lesion[s])                             | Excision of facial bone or tumor/cyst in facial bone            |
| 21047     | Excision of benign tumor or cyst of mandible; requiring extra-oral osteotomy and partial mandibulectomy (eg, locally aggressive or destructive lesion[s]) | Excision of facial bone or tumor/cyst in facial bone            |
| 21046     | Excision of benign tumor or cyst of mandible; requiring intra-oral osteotomy (eg, locally aggressive or destructive lesion[s])                            | Excision of facial bone or tumor/cyst in facial bone            |
| 21045     | Excision of malignant tumor of mandible; radical resection                                                                                                | Excision of facial bone or tumor/cyst in facial bone            |
| 21032     | Excision of maxillary torus palatinus                                                                                                                     | Excision of facial bone or tumor/cyst in facial bone            |
| 21031     | Excision of torus mandibularis                                                                                                                            | Excision of facial bone or tumor/cyst in facial bone            |
| 21030     | Excision of benign tumor or cyst of maxilla or zygoma by enucleation and curettage                                                                        | Excision of facial bone or tumor/cyst in facial bone            |
| 21029     | Removal by contouring of benign tumor of facial bone (eg, fibrous dysplasia)                                                                              | Excision of facial bone or tumor/cyst in facial bone            |
| 21026     | Excision of bone (eg, for osteomyelitis or bone abscess); facial bone(s)                                                                                  | Excision of facial bone or tumor/cyst in facial bone            |
| 21025     | Excision of bone (eg, for osteomyelitis or bone abscess); mandible                                                                                        | Excision of facial bone or tumor/cyst in facial bone            |
| 21044     | Excision of malignant tumor of mandible;                                                                                                                  | Excision of facial bone or tumor/cyst in facial bone            |
| 21040     | Excision of benign tumor or cyst of mandible, by enucleation and/or curettage                                                                             | Excision of facial bone or tumor/cyst in facial bone            |
| 21034     | Excision of malignant tumor of maxilla or zygoma                                                                                                          | Excision of facial bone or tumor/cyst in facial bone            |
| 40819     | Excision of frenum, labial or buccal (frenulectomy, frenectomy, frenectomy)                                                                               | Excision of frenum, labial or buccal                            |
| 25112     | Excision of ganglion, wrist (dorsal or volar); recurrent                                                                                                  | Excision of ganglion, wrist                                     |
| 25111     | Excision of ganglion, wrist (dorsal or volar); primary                                                                                                    | Excision of ganglion, wrist                                     |
| 55041     | Excision of hydrocele; bilateral                                                                                                                          | Excision of hydrocele                                           |
| 55040     | Excision of hydrocele; unilateral                                                                                                                         | Excision of hydrocele                                           |
| 55500     | Excision of hydrocele of spermatic cord, unilateral (separate procedure)                                                                                  | Excision of hydrocele                                           |
| 35907     | Excision of infected graft; abdomen                                                                                                                       | Excision of infected graft                                      |
| 35903     | Excision of infected graft; extremity                                                                                                                     | Excision of infected graft                                      |
| 35901     | Excision of infected graft; neck                                                                                                                          | Excision of infected graft                                      |
| 35905     | Excision of infected graft; thorax                                                                                                                        | Excision of infected graft                                      |
| 61564     | Excision, intra and extracranial, benign tumor of cranial bone (eg, fibrous dysplasia); with optic nerve decompression                                    | Excision of intra and extracranial benign tumor of cranial bone |
| 61563     | Excision, intra and extracranial, benign tumor of cranial bone (eg, fibrous dysplasia); without optic nerve decompression                                 | Excision of intra and extracranial benign tumor of cranial bone |
| 27060     | Excision; ischial bursa                                                                                                                                   | Excision of ischial bursa                                       |
| 68550     | Excision of lacrimal gland tumor; involving osteotomy                                                                                                     | Excision of lacrimal gland or lacrimal gland tumor              |
| 68540     | Excision of lacrimal gland tumor; frontal approach                                                                                                        | Excision of lacrimal gland or lacrimal gland tumor              |
| 68505     | Excision of lacrimal gland (dacryoadenectomy), except for tumor; partial                                                                                  | Excision of lacrimal gland or lacrimal gland tumor              |
| 68500     | Excision of lacrimal gland (dacryoadenectomy), except for tumor; total                                                                                    | Excision of lacrimal gland or lacrimal gland tumor              |
| 68520     | Excision of lacrimal sac (dacryocystectomy)                                                                                                               | Excision of lacrimal sac                                        |
| 19112     | Excision of lactiferous duct fistula                                                                                                                      | Excision of lactiferous duct fistula                            |
| 27347     | Excision of lesion of meniscus or capsule (eg, cyst, ganglion), knee                                                                                      | Excision of lesion of meniscus or capsule, knee                 |
| 44820     | Excision of lesion of mesentery (separate procedure)                                                                                                      | Excision of lesion of mesentery                                 |

| Continued |                                                                                                                    |                                                                                         |
|-----------|--------------------------------------------------------------------------------------------------------------------|-----------------------------------------------------------------------------------------|
| Code      | Code description                                                                                                   | Procedure type                                                                          |
| 40816     | Excision of lesion of mucosa and submucosa, vestibule of mouth; complex, with excision of underlying muscle        | Excision of lesion of mucosa and submucosa, vestibule of mouth                          |
| 40814     | Excision of lesion of mucosa and submucosa, vestibule of mouth; with complex repair                                | Excision of lesion of mucosa and submucosa, vestibule of mouth                          |
| 42107     | Excision, lesion of palate, uvula; with local flap closure                                                         | Excision of lesion of palate, uvula                                                     |
| 48120     | Excision of lesion of pancreas (eg, cyst, adenoma)                                                                 | Excision of lesion of pancreas (eg, cyst, adenoma)                                      |
| 55520     | Excision of lesion of spermatic cord (separate procedure)                                                          | Excision of lesion of spermatic cord                                                    |
| 27630     | Excision of lesion of tendon sheath or capsule (eg, cyst or ganglion), leg and/or ankle                            | Excision of lesion of tendon sheath or capsule (eg, cyst or ganglion), leg and/or ankle |
| 26160     | Excision of lesion of tendon sheath or joint capsule (eg, cyst, mucous cyst, or ganglion), hand or finger          | Excision of lesion of tendon sheath or joint capsule, hand or finger                    |
| 25110     | Excision, lesion of tendon sheath, forearm and/or wrist                                                            | Excision of lesion of tendon sheath, forearm and/or wrist                               |
| 41114     | Excision of lesion of tongue with closure; with local tongue flap                                                  | Excision of lesion of tongue                                                            |
| 41827     | Excision of lesion or tumor (except listed above), dentoalveolar structures; with complex repair                   | Excision of lesion or tumor, dentoalveolar structures                                   |
| 68130     | Excision of lesion, conjunctiva; with adjacent sclera                                                              | Excision of lesion, conjunctiva                                                         |
| 65400     | Excision of lesion, cornea (keratectomy, lamellar, partial), except pterygium                                      | Excision of lesion, cornea (keratectomy, lamellar, partial), except pterygium           |
| 43100     | Excision of lesion, esophagus, with primary repair; cervical approach                                              | Excision of lesion, esophagus                                                           |
| 43101     | Excision of lesion, esophagus, with primary repair; thoracic or abdominal approach                                 | Excision of lesion, esophagus                                                           |
| 66130     | Excision of lesion, sclera                                                                                         | Excision of lesion, sclera                                                              |
| 28092     | Excision of lesion, tendon, tendon sheath, or capsule (including synovectomy) (eg, cyst or ganglion); toe(s), each | Excision of lesion, tendon, tendon sheath, or capsule; foot                             |
| 28090     | Excision of lesion, tendon, tendon sheath, or capsule (including synovectomy) (eg, cyst or ganglion); foot         | Excision of lesion, tendon, tendon sheath, or capsule; foot                             |
| 40527     | Excision of lip; full thickness, reconstruction with cross lip flap (Abbe- Estlander)                              | Excision of lip                                                                         |
| 40525     | Excision of lip; full thickness, reconstruction with local flap (eg, Estlander or fan)                             | Excision of lip                                                                         |
| 40530     | Resection of lip, more than 1/4, without reconstruction                                                            | Excision of lip                                                                         |
| 40520     | Excision of lip; V-excision with primary direct linear closure                                                     | Excision of lip                                                                         |
| 40510     | Excision of lip; transverse wedge excision with primary closure                                                    | Excision of lip                                                                         |
| 54830     | Excision of local lesion of epididymis                                                                             | Excision of local lesion of epididymis                                                  |
| 44800     | Excision of Meckel's diverticulum (diverticulectomy) or omphalomesenteric duct                                     | Excision of Meckel's diverticulum or omphalomesenteric duct                             |
| 55680     | Excision of Mullerian duct cyst                                                                                    | Excision of Mullerian duct cyst                                                         |
| 64788     | Excision of neurofibroma or neurolemmoma; cutaneous nerve                                                          | Excision of neuroma, neurofibroma, or neurolemmoma                                      |
| 64792     | Excision of neurofibroma or neurolemmoma; extensive (including malignant type)                                     | Excision of neuroma, neurofibroma, or neurolemmoma                                      |
| 64790     | Excision of neurofibroma or neurolemmoma; major peripheral nerve                                                   | Excision of neuroma, neurofibroma, or neurolemmoma                                      |
| 64774     | Excision of neuroma; cutaneous nerve, surgically identifiable                                                      | Excision of neuroma, neurofibroma, or neurolemmoma                                      |
| 64782     | Excision of neuroma; hand or foot, except digital nerve                                                            | Excision of neuroma, neurofibroma, or neurolemmoma                                      |
| 64776     | Excision of neuroma; digital nerve, 1 or both, same digit                                                          | Excision of neuroma, neurofibroma, or neurolemmoma                                      |
| 28080     | Excision, interdigital (Morton) neuroma, single, each                                                              | Excision of neuroma, neurofibroma, or neurolemmoma                                      |
| 64786     | Excision of neuroma; sciatic nerve                                                                                 | Excision of neuroma, neurofibroma, or neurolemmoma                                      |
| 64784     | Excision of neuroma; major peripheral nerve, except sciatic                                                        | Excision of neuroma, neurofibroma, or neurolemmoma                                      |
| 24105     | Excision, olecranon bursa                                                                                          | Excision of olecranon bursa                                                             |

| Continued |                                                                                                                             |                                                                  |
|-----------|-----------------------------------------------------------------------------------------------------------------------------|------------------------------------------------------------------|
| Code      | Code description                                                                                                            | Procedure type                                                   |
| 41823     | Excision of osseous tuberosities, dentoalveolar structures                                                                  | Excision of osseous tuberosities, dentoalveolar structures       |
| 15958     | Excision, trochanteric pressure ulcer, in preparation for muscle or myocutaneous flap or skin graft closure; with ostectomy | Excision of pelvic pressure ulcer                                |
| 15956     | Excision, trochanteric pressure ulcer, in preparation for muscle or myocutaneous flap or skin graft closure;                | Excision of pelvic pressure ulcer                                |
| 15953     | Excision, trochanteric pressure ulcer, with skin flap closure; with ostectomy                                               | Excision of pelvic pressure ulcer                                |
| 15952     | Excision, trochanteric pressure ulcer, with skin flap closure;                                                              | Excision of pelvic pressure ulcer                                |
| 15951     | Excision, trochanteric pressure ulcer, with primary suture; with ostectomy                                                  | Excision of pelvic pressure ulcer                                |
| 15950     | Excision, trochanteric pressure ulcer, with primary suture;                                                                 | Excision of pelvic pressure ulcer                                |
| 15946     | Excision, ischial pressure ulcer, with ostectomy, in preparation for muscle or myocutaneous flap or skin graft closure      | Excision of pelvic pressure ulcer                                |
| 15945     | Excision, ischial pressure ulcer, with skin flap closure; with ostectomy                                                    | Excision of pelvic pressure ulcer                                |
| 15944     | Excision, ischial pressure ulcer, with skin flap closure;                                                                   | Excision of pelvic pressure ulcer                                |
| 15941     | Excision, ischial pressure ulcer, with primary suture; with ostectomy (ischietomy)                                          | Excision of pelvic pressure ulcer                                |
| 15940     | Excision, ischial pressure ulcer, with primary suture;                                                                      | Excision of pelvic pressure ulcer                                |
| 15937     | Excision, sacral pressure ulcer, in preparation for muscle or myocutaneous flap or skin graft closure; with ostectomy       | Excision of pelvic pressure ulcer                                |
| 15936     | Excision, sacral pressure ulcer, in preparation for muscle or myocutaneous flap or skin graft closure;                      | Excision of pelvic pressure ulcer                                |
| 15935     | Excision, sacral pressure ulcer, with skin flap closure; with ostectomy                                                     | Excision of pelvic pressure ulcer                                |
| 15934     | Excision, sacral pressure ulcer, with skin flap closure;                                                                    | Excision of pelvic pressure ulcer                                |
| 15933     | Excision, sacral pressure ulcer, with primary suture; with ostectomy                                                        | Excision of pelvic pressure ulcer                                |
| 15931     | Excision, sacral pressure ulcer, with primary suture;                                                                       | Excision of pelvic pressure ulcer                                |
| 15922     | Excision, coccygeal pressure ulcer, with coccygectomy; with flap closure                                                    | Excision of pelvic pressure ulcer                                |
| 15920     | Excision, coccygeal pressure ulcer, with coccygectomy; with primary suture                                                  | Excision of pelvic pressure ulcer                                |
| 54112     | Excision of penile plaque (Peyronie disease); with graft greater than 5 cm in length                                        | Excision of penile plaque                                        |
| 54111     | Excision of penile plaque (Peyronie disease); with graft to 5 cm in length                                                  | Excision of penile plaque                                        |
| 54110     | Excision of penile plaque (Peyronie disease);                                                                               | Excision of penile plaque                                        |
| 50290     | Excision of perinephric cyst                                                                                                | Excision of perinephric cyst                                     |
| 11772     | Excision of pilonidal cyst or sinus; complicated                                                                            | Excision of pilonidal cyst or sinus                              |
| 11771     | Excision of pilonidal cyst or sinus; extensive                                                                              | Excision of pilonidal cyst or sinus                              |
| 27340     | Excision, prepatellar bursa                                                                                                 | Excision of prepatellar bursa                                    |
| 49215     | Excision of presacral or sacrococcygeal tumor                                                                               | Excision of presacral or sacrococcygeal tumor                    |
| 24130     | Excision, radial head                                                                                                       | Excision of radial head                                          |
| 45135     | Excision of rectal procidentia, with anastomosis; abdominal and perineal approach                                           | Excision of rectal procidentia                                   |
| 45130     | Excision of rectal procidentia, with anastomosis; perineal approach                                                         | Excision of rectal procidentia                                   |
| 45172     | Excision of rectal tumor, transanal approach; including muscularis propria (ie, full thickness)                             | Excision of rectal tumor, transanal, transsacral, transcoccygeal |
| 45171     | Excision of rectal tumor, transanal approach; not including muscularis propria (ie, partial thickness)                      | Excision of rectal tumor, transanal, transsacral, transcoccygeal |
| 45160     | Excision of rectal tumor by proctotomy, transsacral or transcoccygeal approach                                              | Excision of rectal tumor, transanal, transsacral, transcoccygeal |
| 42450     | Excision of sublingual gland                                                                                                | Excision of salivary tumor or salivary gland                     |
| 42440     | Excision of submandibular (submaxillary) gland                                                                              | Excision of salivary tumor or salivary gland                     |
| 42425     | Excision of parotid tumor or parotid gland; total, en bloc removal with sacrifice of facial nerve                           | Excision of salivary tumor or salivary gland                     |
| 42420     | Excision of parotid tumor or parotid gland; total, with dissection and preservation of facial nerve                         | Excision of salivary tumor or salivary gland                     |
| 42415     | Excision of parotid tumor or parotid gland; lateral lobe, with dissection and preservation of facial nerve                  | Excision of salivary tumor or salivary gland                     |
| 42410     | Excision of parotid tumor or parotid gland; lateral lobe, without nerve dissection                                          | Excision of salivary tumor or salivary gland                     |
| 42426     | Excision of parotid tumor or parotid gland; total, with unilateral radical neck dissection                                  | Excision of salivary tumor or salivary gland                     |
| 69145     | Excision soft tissue lesion, external auditory canal                                                                        | Excision of soft tissue lesion                                   |
| 22901     | Excision, tumor, soft tissue of abdominal wall, subfascial (eg, intramuscular); 5 cm or greater                             | Excision of soft tissue lesion                                   |

| Continued |                                                                                                                              |                                                          |
|-----------|------------------------------------------------------------------------------------------------------------------------------|----------------------------------------------------------|
| Code      | Code description                                                                                                             | Procedure type                                           |
| 22900     | Excision, tumor, soft tissue of abdominal wall, subfascial (eg, intramuscular); less than 5 cm                               | Excision of soft tissue lesion                           |
| 21933     | Excision, tumor, soft tissue of back or flank, subfascial (eg, intramuscular); 5 cm or greater                               | Excision of soft tissue lesion                           |
| 21932     | Excision, tumor, soft tissue of back or flank, subfascial (eg, intramuscular); less than 5 cm                                | Excision of soft tissue lesion                           |
| 21014     | Excision, tumor, soft tissue of face and scalp, subfascial (eg, subgaleal, intramuscular); 2 cm or greater                   | Excision of soft tissue lesion                           |
| 21013     | Excision, tumor, soft tissue of face and scalp, subfascial (eg, subgaleal, intramuscular); less than 2 cm                    | Excision of soft tissue lesion                           |
| 28045     | Excision, tumor, soft tissue of foot or toe, subfascial (eg, intramuscular); less than 1.5 cm                                | Excision of soft tissue lesion                           |
| 28041     | Excision, tumor, soft tissue of foot or toe, subfascial (eg, intramuscular); 1.5 cm or greater                               | Excision of soft tissue lesion                           |
| 27619     | Excision, tumor, soft tissue of leg or ankle area, subfascial (eg, intramuscular); less than 5 cm                            | Excision of soft tissue lesion                           |
| 27634     | Excision, tumor, soft tissue of leg or ankle area, subfascial (eg, intramuscular); 5 cm or greater                           | Excision of soft tissue lesion                           |
| 27339     | Excision, tumor, soft tissue of thigh or knee area, subfascial (eg, intramuscular); 5 cm or greater                          | Excision of soft tissue lesion                           |
| 27328     | Excision, tumor, soft tissue of thigh or knee area, subfascial (eg, intramuscular); less than 5 cm                           | Excision of soft tissue lesion                           |
| 21554     | Excision, tumor, soft tissue of neck or anterior thorax, subfascial (eg, intramuscular); 5 cm or greater                     | Excision of soft tissue lesion                           |
| 21556     | Excision, tumor, soft tissue of neck or anterior thorax, subfascial (eg, intramuscular); less than 5 cm                      | Excision of soft tissue lesion                           |
| 27045     | Excision, tumor, soft tissue of pelvis and hip area, subfascial (eg, intramuscular); 5 cm or greater                         | Excision of soft tissue lesion                           |
| 27048     | Excision, tumor, soft tissue of pelvis and hip area, subfascial (eg, intramuscular); less than 5 cm                          | Excision of soft tissue lesion                           |
| 23076     | Excision, tumor, soft tissue of shoulder area, subfascial (eg, intramuscular); less than 5 cm                                | Excision of soft tissue lesion                           |
| 23073     | Excision, tumor, soft tissue of shoulder area, subfascial (eg, intramuscular); 5 cm or greater                               | Excision of soft tissue lesion                           |
| 26116     | Excision, tumor, soft tissue, or vascular malformation, of hand or finger, subfascial (eg, intramuscular); less than 1.5 cm  | Excision of soft tissue lesion                           |
| 25076     | Excision, tumor, soft tissue of forearm and/or wrist area, subfascial (eg, intramuscular); less than 3 cm                    | Excision of soft tissue lesion                           |
| 24076     | Excision, tumor, soft tissue of upper arm or elbow area, subfascial (eg, intramuscular); less than 5 cm                      | Excision of soft tissue lesion                           |
| 24073     | Excision, tumor, soft tissue of upper arm or elbow area, subfascial (eg, intramuscular); 5 cm or greater                     | Excision of soft tissue lesion                           |
| 25073     | Excision, tumor, soft tissue of forearm and/or wrist area, subfascial (eg, intramuscular); 3 cm or greater                   | Excision of soft tissue lesion                           |
| 26113     | Excision, tumor, soft tissue, or vascular malformation, of hand or finger, subfascial (eg, intramuscular); 1.5 cm or greater | Excision of soft tissue lesion                           |
| 54840     | Excision of spermatocele, with or without epididymectomy                                                                     | Excision of spermatocele, with or without epididymectomy |
| 43610     | Excision, local; ulcer or benign tumor of stomach                                                                            | Excision of stomach ulcer or tumor                       |
| 43611     | Excision, local; malignant tumor of stomach                                                                                  | Excision of stomach ulcer or tumor                       |
| 27345     | Excision of synovial cyst of popliteal space (eg, Baker's cyst)                                                              | Excision of synovial cyst of popliteal space             |
| 26415     | Excision of extensor tendon, with implantation of synthetic rod for delayed tendon graft, hand or finger, each rod           | Excision of tendon of hand or finger                     |
| 26390     | Excision flexor tendon, with implantation of synthetic rod for delayed tendon graft, hand or finger, each rod                | Excision of tendon of hand or finger                     |
| 26170     | Excision of tendon, palm, flexor or extensor, single, each tendon                                                            | Excision of tendon, hand                                 |
| 26180     | Excision of tendon, finger, flexor or extensor, each tendon                                                                  | Excision of tendon, hand                                 |
| 25109     | Excision of tendon, forearm and/or wrist, flexor or extensor, each                                                           | Excision of tendon, hand                                 |
| 60281     | Excision of thyroglossal duct cyst or sinus; recurrent                                                                       | Excision of thyroglossal duct cyst or sinus              |
| 60280     | Excision of thyroglossal duct cyst or sinus;                                                                                 | Excision of thyroglossal duct cyst or sinus              |
| 42860     | Excision of tonsil tags                                                                                                      | Excision of tonsil tags                                  |
| 31785     | Excision of tracheal tumor or carcinoma; cervical                                                                            | Excision of tracheal tumor or carcinoma                  |
| 31786     | Excision of tracheal tumor or carcinoma; thoracic                                                                            | Excision of tracheal tumor or carcinoma                  |

| Continued |                                                                                                                                                                                                               |                                                                            |
|-----------|---------------------------------------------------------------------------------------------------------------------------------------------------------------------------------------------------------------|----------------------------------------------------------------------------|
| Code      | Code description                                                                                                                                                                                              | Procedure type                                                             |
| 27062     | Excision; trochanteric bursa or calcification                                                                                                                                                                 | Excision of trochanteric bursa or calcification                            |
| 51500     | Excision of urachal cyst or sinus, with or without umbilical hernia repair                                                                                                                                    | Excision of urachal cyst or sinus                                          |
| 53235     | Excision of urethral diverticulum (separate procedure); male                                                                                                                                                  | Excision of urethral diverticulum                                          |
| 53230     | Excision of urethral diverticulum (separate procedure); female                                                                                                                                                | Excision of urethral diverticulum                                          |
| 57135     | Excision of vaginal cyst or tumor                                                                                                                                                                             | Excision of vaginal cyst or tumor                                          |
| 57130     | Excision of vaginal septum                                                                                                                                                                                    | Excision of vaginal septum                                                 |
| 25130     | Excision or curettage of bone cyst or benign tumor of carpal bones;                                                                                                                                           | Excision or curettage of bone cyst or benign tumor                         |
| 23146     | Excision or curettage of bone cyst or benign tumor of clavicle or scapula; with allograft                                                                                                                     | Excision or curettage of bone cyst or benign tumor                         |
| 23145     | Excision or curettage of bone cyst or benign tumor of clavicle or scapula; with autograft (includes obtaining graft)                                                                                          | Excision or curettage of bone cyst or benign tumor                         |
| 23140     | Excision or curettage of bone cyst or benign tumor of clavicle or scapula;                                                                                                                                    | Excision or curettage of bone cyst or benign tumor                         |
| 24116     | Excision or curettage of bone cyst or benign tumor, humerus; with allograft                                                                                                                                   | Excision or curettage of bone cyst or benign tumor                         |
| 24115     | Excision or curettage of bone cyst or benign tumor, humerus; with autograft (includes obtaining graft)                                                                                                        | Excision or curettage of bone cyst or benign tumor                         |
| 24110     | Excision or curettage of bone cyst or benign tumor, humerus;                                                                                                                                                  | Excision or curettage of bone cyst or benign tumor                         |
| 23156     | Excision or curettage of bone cyst or benign tumor of proximal humerus; with allograft                                                                                                                        | Excision or curettage of bone cyst or benign tumor                         |
| 23155     | Excision or curettage of bone cyst or benign tumor of proximal humerus; with autograft (includes obtaining graft)                                                                                             | Excision or curettage of bone cyst or benign tumor                         |
| 23150     | Excision or curettage of bone cyst or benign tumor of proximal humerus;                                                                                                                                       | Excision or curettage of bone cyst or benign tumor                         |
| 25126     | Excision or curettage of bone cyst or benign tumor of radius or ulna (excluding head or neck of radius and olecranon process); with allograft                                                                 | Excision or curettage of bone cyst or benign tumor                         |
| 25125     | Excision or curettage of bone cyst or benign tumor of radius or ulna (excluding head or neck of radius and olecranon process); with autograft (includes obtaining graft)                                      | Excision or curettage of bone cyst or benign tumor                         |
| 25120     | Excision or curettage of bone cyst or benign tumor of radius or ulna (excluding head or neck of radius and olecranon process);                                                                                | Excision or curettage of bone cyst or benign tumor                         |
| 24126     | Excision or curettage of bone cyst or benign tumor of head or neck of radius or olecranon process; with allograft                                                                                             | Excision or curettage of bone cyst or benign tumor                         |
| 24125     | Excision or curettage of bone cyst or benign tumor of head or neck of radius or olecranon process; with autograft (includes obtaining graft)                                                                  | Excision or curettage of bone cyst or benign tumor                         |
| 24120     | Excision or curettage of bone cyst or benign tumor of head or neck of radius or olecranon process;                                                                                                            | Excision or curettage of bone cyst or benign tumor                         |
| 49205     | Excision or destruction - open, intra-abdominal tumors, cysts or endometriomas, 1 or more peritoneal, mesenteric, or retroperitoneal primary or secondary tumors; largest tumor greater than 10.0 cm diameter | Excision or destruction - intra-abdominal tumors, cysts or endometriomas   |
| 49204     | Excision or destruction - open, intra-abdominal tumors, cysts or endometriomas, 1 or more peritoneal, mesenteric, or retroperitoneal primary or secondary tumors; largest tumor 5.1-10.0 cm diameter          | Excision or destruction - intra-abdominal tumors, cysts or endometriomas   |
| 49203     | Excision or destruction - open, intra-abdominal tumors, cysts or endometriomas, 1 or more peritoneal, mesenteric, or retroperitoneal primary or secondary tumors; largest tumor 5 cm diameter or less         | Excision or destruction - intra-abdominal tumors, cysts or endometriomas   |
| 42870     | Excision or destruction lingual tonsil, any method (separate procedure)                                                                                                                                       | Excision or destruction of lingual tonsil, any method (separate procedure) |
| 65426     | Excision or transposition of pterygium; with graft                                                                                                                                                            | Excision or transposition of pterygium                                     |
| 65420     | Excision or transposition of pterygium; without graft                                                                                                                                                         | Excision or transposition of pterygium                                     |
| 50280     | Excision or unroofing of cyst(s) of kidney                                                                                                                                                                    | Excision or unroofing of cyst(s) of kidney                                 |
| 31780     | Excision tracheal stenosis and anastomosis; cervical                                                                                                                                                          | Excision tracheal stenosis and anastomosis                                 |
| 31781     | Excision tracheal stenosis and anastomosis; cervicothoracic                                                                                                                                                   | Excision tracheal stenosis and anastomosis                                 |
| 33269     | Exclusion of left atrial appendage, thoracoscopic, any method (eg, excision, isolation via stapling, oversewing, ligation, plication, clip)                                                                   | Exclusion of left atrial appendage                                         |

| Continued |                                                                                                                                                                              |                                                                                        |
|-----------|------------------------------------------------------------------------------------------------------------------------------------------------------------------------------|----------------------------------------------------------------------------------------|
| Code      | Code description                                                                                                                                                             | Procedure type                                                                         |
| 33267     | Exclusion of left atrial appendage - open, any method (eg, excision, isolation via stapling, oversewing, ligation, plication, clip)                                          | Exclusion of left atrial appendage                                                     |
| 44700     | Exclusion of small intestine from pelvis by mesh or other prosthesis, or native tissue (eg, bladder or omentum)                                                              | Exclusion of small intestine from pelvis by mesh or other prosthesis, or native tissue |
| 53220     | Excision or fulguration of carcinoma of urethra                                                                                                                              | Exclusion or fulguration of urethra                                                    |
| 53270     | Excision or fulguration; Skene's glands                                                                                                                                      | Exclusion or fulguration of urethra                                                    |
| 53265     | Excision or fulguration; urethral caruncle                                                                                                                                   | Exclusion or fulguration of urethra                                                    |
| 53260     | Excision or fulguration; urethral polyp(s), distal urethra                                                                                                                   | Exclusion or fulguration of urethra                                                    |
| 53275     | Excision or fulguration; urethral prolapse                                                                                                                                   | Exclusion or fulguration of urethra                                                    |
| 65112     | Exenteration of orbit (does not include skin graft), removal of orbital contents; with therapeutic removal of bone                                                           | Exenteration of orbit                                                                  |
| 65110     | Exenteration of orbit (does not include skin graft), removal of orbital contents; only                                                                                       | Exenteration of orbit                                                                  |
| 65114     | Exenteration of orbit (does not include skin graft), removal of orbital contents; with muscle or myocutaneous flap                                                           | Exenteration of orbit                                                                  |
| 47700     | Exploration for congenital atresia of bile ducts, without repair, with or without liver biopsy, with or without cholangiography                                              | Exploration for congenital atresia of bile ducts, without repair                       |
| 35840     | Exploration for postoperative hemorrhage, thrombosis or infection; abdomen                                                                                                   | Exploration for postoperative hemorrhage, thrombosis or infection                      |
| 35820     | Exploration for postoperative hemorrhage, thrombosis or infection; chest                                                                                                     | Exploration for postoperative hemorrhage, thrombosis or infection                      |
| 35860     | Exploration for postoperative hemorrhage, thrombosis or infection; extremity                                                                                                 | Exploration for postoperative hemorrhage, thrombosis or infection                      |
| 35800     | Exploration for postoperative hemorrhage, thrombosis or infection; neck                                                                                                      | Exploration for postoperative hemorrhage, thrombosis or infection                      |
| 35701     | Exploration (not followed by surgical repair), with or without lysis of artery; carotid artery                                                                               | Exploration of artery without surgical repair                                          |
| 35741     | Exploration (not followed by surgical repair), with or without lysis of artery; popliteal artery                                                                             | Exploration of artery without surgical repair                                          |
| 35721     | Exploration (not followed by surgical repair), with or without lysis of artery; femoral artery                                                                               | Exploration of artery without surgical repair                                          |
| 35703     | Exploration not followed by surgical repair, artery; lower extremity (eg, common femoral, deep femoral, superficial femoral, popliteal, tibial, peroneal)                    | Exploration of artery without surgical repair                                          |
| 35702     | Exploration not followed by surgical repair, artery; upper extremity (eg, axillary, brachial, radial, ulnar)                                                                 | Exploration of artery without surgical repair                                          |
| 35761     | Exploration (not followed by surgical repair), with or without lysis of artery; other vessels                                                                                | Exploration of artery without surgical repair                                          |
| 61334     | Exploration of orbit (transcranial approach); with removal of foreign body                                                                                                   | Exploration of orbit (transcranial approach)                                           |
| 61333     | Exploration of orbit (transcranial approach); with removal of lesion                                                                                                         | Exploration of orbit (transcranial approach)                                           |
| 61332     | Exploration of orbit (transcranial approach); with biopsy                                                                                                                    | Exploration of orbit (transcranial approach)                                           |
| 20102     | Exploration of penetrating wound (separate procedure); abdomen/flank/back                                                                                                    | Exploration of penetrating wound                                                       |
| 20101     | Exploration of penetrating wound (separate procedure); chest                                                                                                                 | Exploration of penetrating wound                                                       |
| 20103     | Exploration of penetrating wound (separate procedure); extremity                                                                                                             | Exploration of penetrating wound                                                       |
| 20100     | Exploration of penetrating wound (separate procedure); neck                                                                                                                  | Exploration of penetrating wound                                                       |
| 22830     | Exploration of spinal fusion                                                                                                                                                 | Exploration of spinal fusion                                                           |
| 45563     | Exploration, repair, and presacral drainage for rectal injury; with colostomy                                                                                                | Exploration, repair, and presacral drainage for rectal injury                          |
| 45562     | Exploration, repair, and presacral drainage for rectal injury;                                                                                                               | Exploration, repair, and presacral drainage for rectal injury                          |
| 49010     | Exploration, retroperitoneal area with or without biopsy(s) (separate procedure)                                                                                             | Exploration, retroperitoneal area with or without biopsy(s)                            |
| 49000     | Exploratory laparotomy, exploratory celiotomy with or without biopsy(s) (separate procedure)                                                                                 | Exploratory laparotomy                                                                 |
| 55860     | Exposure of prostate, any approach, for insertion of radioactive substance;                                                                                                  | Exposure of prostate, any approach, for insertion of radioactive substance             |
| 55865     | Exposure of prostate, any approach, for insertion of radioactive substance; with bilateral pelvic lymphadenectomy, including external iliac, hypogastric and obturator nodes | Exposure of prostate, any approach, for insertion of radioactive substance             |

| Continued |                                                                                                                                                                                                             |                                                                            |
|-----------|-------------------------------------------------------------------------------------------------------------------------------------------------------------------------------------------------------------|----------------------------------------------------------------------------|
| Code      | Code description                                                                                                                                                                                            | Procedure type                                                             |
| 55862     | Exposure of prostate, any approach, for insertion of radioactive substance; with lymph node biopsy(s) (limited pelvic lymphadenectomy)                                                                      | Exposure of prostate, any approach, for insertion of radioactive substance |
| 26437     | Realignment of extensor tendon, hand, each tendon                                                                                                                                                           | Extensor tendon centralization, hand                                       |
| 32540     | Extrapleural enucleation of empyema (empyemectomy)                                                                                                                                                          | Extrapleural enucleation of empyema                                        |
| 15825     | Rhytidectomy; neck with platysmal tightening (platysmal flap, P-flap)                                                                                                                                       | Facelift                                                                   |
| 15829     | Rhytidectomy; superficial musculoaponeurotic system (SMAS) flap                                                                                                                                             | Facelift                                                                   |
| 15828     | Rhytidectomy; cheek, chin, and neck                                                                                                                                                                         | Facelift                                                                   |
| 15826     | Rhytidectomy; glabellar frown lines                                                                                                                                                                         | Facelift                                                                   |
| 15824     | Rhytidectomy; forehead                                                                                                                                                                                      | Facelift                                                                   |
| 64866     | Anastomosis; facial-spinal accessory                                                                                                                                                                        | Facial nerve reconstruction or repair                                      |
| 15845     | Graft for facial nerve paralysis; regional muscle transfer                                                                                                                                                  | Facial nerve reconstruction or repair                                      |
| 15842     | Graft for facial nerve paralysis; free muscle flap by microsurgical technique                                                                                                                               | Facial nerve reconstruction or repair                                      |
| 15841     | Graft for facial nerve paralysis; free muscle graft (including obtaining graft)                                                                                                                             | Facial nerve reconstruction or repair                                      |
| 15840     | Graft for facial nerve paralysis; free fascia graft (including obtaining fascia)                                                                                                                            | Facial nerve reconstruction or repair                                      |
| 69745     | Suture facial nerve, intratemporal, with or without graft or decompression; including medial to geniculate ganglion                                                                                         | Facial nerve reconstruction or repair                                      |
| 69740     | Suture facial nerve, intratemporal, with or without graft or decompression; lateral to geniculate ganglion                                                                                                  | Facial nerve reconstruction or repair                                      |
| 20922     | Fascia lata graft; by incision and area exposure, complex or sheet                                                                                                                                          | Fascia lata graft                                                          |
| 20920     | Fascia lata graft; by stripper                                                                                                                                                                              | Fascia lata graft                                                          |
| 28062     | Fasciectomy, plantar fascia; radical (separate procedure)                                                                                                                                                   | Fasciectomy or fasciotomy                                                  |
| 28060     | Fasciectomy, plantar fascia; partial (separate procedure)                                                                                                                                                   | Fasciectomy or fasciotomy                                                  |
| 28008     | Fasciotomy, foot and/or toe                                                                                                                                                                                 | Fasciectomy or fasciotomy                                                  |
| 27305     | Fasciotomy, iliotibial (tenotomy) - open                                                                                                                                                                    | Fasciectomy or fasciotomy                                                  |
| 27057     | Decompression fasciotomy(ies), pelvic (buttock) compartment(s) (eg, gluteus medius-minimus, gluteus maximus, iliopsoas, and/or tensor fascia lata muscle) with debridement of nonviable muscle, unilateral  | Fasciectomy or fasciotomy                                                  |
| 27027     | Decompression fasciotomy(ies), pelvic (buttock) compartment(s) (eg, gluteus medius-minimus, gluteus maximus, iliopsoas, and/or tensor fascia lata muscle), unilateral                                       | Fasciectomy or fasciotomy                                                  |
| 27025     | Fasciectomy, hip or thigh, any type                                                                                                                                                                         | Fasciectomy or fasciotomy                                                  |
| 26123     | Fasciectomy, partial palmar with release of single digit including proximal interphalangeal joint, with or without Z-plasty, other local tissue rearrangement, or skin grafting (includes obtaining graft); | Fasciectomy or fasciotomy                                                  |
| 26121     | Fasciectomy, palm only, with or without Z-plasty, other local tissue rearrangement, or skin grafting (includes obtaining graft)                                                                             | Fasciectomy or fasciotomy                                                  |
| 26045     | Fasciotomy, palmar (eg, Dupuytren's contracture); open, partial                                                                                                                                             | Fasciectomy or fasciotomy                                                  |
| 69820     | Fenestration semicircular canal                                                                                                                                                                             | Fenestration semicircular canal                                            |
| 58976     | Gamete, zygote, or embryo intrafallopian transfer; any method                                                                                                                                               | Fertility procedures                                                       |
| 59897     | Unlisted fetal invasive procedure, including ultrasound guidance, when performed                                                                                                                            | Fetal procedure                                                            |
| 59076     | Fetal shunt placement, including ultrasound guidance                                                                                                                                                        | Fetal shunt placement, including ultrasound guidance                       |
| 14350     | Filletted finger or toe flap, including preparation of recipient site                                                                                                                                       | Filletted finger or toe flap, including preparation of recipient site      |
| 58760     | Fimbrioplasty                                                                                                                                                                                               | Fimbrioplasty                                                              |
| 46200     | Fissurectomy, including sphincterotomy, when performed                                                                                                                                                      | Fissurectomy                                                               |
| 66172     | Fistulization of sclera for glaucoma; trabeculectomy ab externo with scarring from previous ocular surgery or trauma (includes injection of antifibrotic agents)                                            | Fistulization of sclera for glaucoma                                       |
| 66170     | Fistulization of sclera for glaucoma; trabeculectomy ab externo in absence of previous surgery                                                                                                              | Fistulization of sclera for glaucoma                                       |
| 66165     | Fistulization of sclera for glaucoma; iridencleisis or iridotaxis                                                                                                                                           | Fistulization of sclera for glaucoma                                       |
| 66160     | Fistulization of sclera for glaucoma; sclerectomy with punch or scissors, with iridectomy                                                                                                                   | Fistulization of sclera for glaucoma                                       |
| 66155     | Fistulization of sclera for glaucoma; thermocauterization with iridectomy                                                                                                                                   | Fistulization of sclera for glaucoma                                       |
| 66150     | Fistulization of sclera for glaucoma; trephination with iridectomy                                                                                                                                          | Fistulization of sclera for glaucoma                                       |
| 54620     | Fixation of contralateral testis (separate procedure)                                                                                                                                                       | Fixation of contralateral testis                                           |
| 41500     | Fixation of tongue, mechanical, other than suture (eg, K-wire)                                                                                                                                              | Fixation of tongue, mechanical                                             |
| 20973     | Free osteocutaneous flap with microvascular anastomosis; great toe with web space                                                                                                                           | Flap reconstruction                                                        |
| 20972     | Free osteocutaneous flap with microvascular anastomosis; metatarsal                                                                                                                                         | Flap reconstruction                                                        |

| Continued |                                                                                                                                                                                       |                                                      |
|-----------|---------------------------------------------------------------------------------------------------------------------------------------------------------------------------------------|------------------------------------------------------|
| Code      | Code description                                                                                                                                                                      | Procedure type                                       |
| 15758     | Free fascial flap with microvascular anastomosis                                                                                                                                      | Flap reconstruction                                  |
| 15757     | Free skin flap with microvascular anastomosis                                                                                                                                         | Flap reconstruction                                  |
| 15756     | Free muscle or myocutaneous flap with microvascular anastomosis                                                                                                                       | Flap reconstruction                                  |
| 15750     | Flap; neurovascular pedicle                                                                                                                                                           | Flap reconstruction                                  |
| 15740     | Flap; island pedicle requiring identification and dissection of an anatomically named axial vessel                                                                                    | Flap reconstruction                                  |
| 15736     | Muscle, myocutaneous, or fasciocutaneous flap; upper extremity                                                                                                                        | Flap reconstruction                                  |
| 15734     | Muscle, myocutaneous, or fasciocutaneous flap; trunk                                                                                                                                  | Flap reconstruction                                  |
| 15733     | Muscle, myocutaneous, or fasciocutaneous flap; head and neck with named vascular pedicle (ie, buccinators, genioglossus, temporalis, masseter, sternocleidomastoid, levator scapulae) | Flap reconstruction                                  |
| 15732     | Muscle, myocutaneous, or fasciocutaneous flap; head and neck (eg, temporalis, masseter muscle, sternocleidomastoid, levator scapulae)                                                 | Flap reconstruction                                  |
| 15731     | Forehead flap with preservation of vascular pedicle (eg, axial pattern flap, paramedian forehead flap)                                                                                | Flap reconstruction                                  |
| 15730     | Midface flap (ie, zygomaticofacial flap) with preservation of vascular pedicle(s)                                                                                                     | Flap reconstruction                                  |
| 15650     | Transfer, intermediate, of any pedicle flap (eg, abdomen to wrist, Walking tube), any location                                                                                        | Flap reconstruction                                  |
| 15738     | Muscle, myocutaneous, or fasciocutaneous flap; lower extremity                                                                                                                        | Flap reconstruction                                  |
| 15630     | Delay of flap or sectioning of flap (division and inset); at eyelids, nose, ears, or lips                                                                                             | Flap reconstruction                                  |
| 15620     | Delay of flap or sectioning of flap (division and inset); at forehead, cheeks, chin, neck, axillae, genitalia, hands, or feet                                                         | Flap reconstruction                                  |
| 15610     | Delay of flap or sectioning of flap (division and inset); at scalp, arms, or legs                                                                                                     | Flap reconstruction                                  |
| 15600     | Delay of flap or sectioning of flap (division and inset); at trunk                                                                                                                    | Flap reconstruction                                  |
| 15576     | Formation of direct or tubed pedicle, with or without transfer; eyelids, nose, ears, lips, or intraoral                                                                               | Flap reconstruction                                  |
| 15574     | Formation of direct or tubed pedicle, with or without transfer; forehead, cheeks, chin, mouth, neck, axillae, genitalia, hands or feet                                                | Flap reconstruction                                  |
| 15572     | Formation of direct or tubed pedicle, with or without transfer; scalp, arms, or legs                                                                                                  | Flap reconstruction                                  |
| 15570     | Formation of direct or tubed pedicle, with or without transfer; trunk                                                                                                                 | Flap reconstruction                                  |
| 20970     | Free osteocutaneous flap with microvascular anastomosis; iliac crest                                                                                                                  | Flap reconstruction                                  |
| 20969     | Free osteocutaneous flap with microvascular anastomosis; other than iliac crest, metatarsal, or great toe                                                                             | Flap reconstruction                                  |
| 20962     | Bone graft with microvascular anastomosis; other than fibula, iliac crest, or metatarsal                                                                                              | Flap reconstruction                                  |
| 20957     | Bone graft with microvascular anastomosis; metatarsal                                                                                                                                 | Flap reconstruction                                  |
| 20956     | Bone graft with microvascular anastomosis; iliac crest                                                                                                                                | Flap reconstruction                                  |
| 20955     | Bone graft with microvascular anastomosis; fibula                                                                                                                                     | Flap reconstruction                                  |
| 49904     | Omental flap, extra-abdominal (eg, for reconstruction of sternal and chest wall defects)                                                                                              | Flap reconstruction                                  |
| 49906     | Free omental flap with microvascular anastomosis                                                                                                                                      | Flap reconstruction                                  |
| 25316     | Flexor origin slide (eg, for cerebral palsy, Volkmann contracture), forearm and/or wrist; with tendon(s) transfer                                                                     | Flexor origin slide, forearm and/or wrist            |
| 25315     | Flexor origin slide (eg, for cerebral palsy, Volkmann contracture), forearm and/or wrist;                                                                                             | Flexor origin slide, forearm and/or wrist            |
| 24331     | Flexor-plasty, elbow (eg, Steindler type advancement); with extensor advancement                                                                                                      | Flexor-plasty, elbow                                 |
| 24330     | Flexor-plasty, elbow (eg, Steindler type advancement);                                                                                                                                | Flexor-plasty, elbow                                 |
| 58970     | Follicle puncture for oocyte retrieval, any method                                                                                                                                    | Follicle puncture for oocyte retrieval               |
| 30930     | Fracture nasal inferior turbinate(s), therapeutic                                                                                                                                     | Fracture of nasal inferior turbinate(s)              |
| 43496     | Free jejunum transfer with microvascular anastomosis                                                                                                                                  | Free jejunum transfer with microvascular anastomosis |
| 41520     | Frenoplasty (surgical revision of frenum, eg, with Z-plasty)                                                                                                                          | Frenoplasty                                          |
| 43888     | Gastric restrictive procedure - open; removal and replacement of subcutaneous port component only                                                                                     | Gastric bypass                                       |
| 43886     | Gastric restrictive procedure - open; revision of subcutaneous port component only                                                                                                    | Gastric bypass                                       |
| 43847     | Gastric restrictive procedure, with gastric bypass for morbid obesity; with small intestine reconstruction to limit absorption                                                        | Gastric bypass                                       |
| 43846     | Gastric restrictive procedure, with gastric bypass for morbid obesity; with short limb (150 cm or less) Roux-en-Y gastroenterostomy                                                   | Gastric bypass                                       |

| Continued |                                                                                                                                                                                                                                                                                |                                                                                 |
|-----------|--------------------------------------------------------------------------------------------------------------------------------------------------------------------------------------------------------------------------------------------------------------------------------|---------------------------------------------------------------------------------|
| Code      | Code description                                                                                                                                                                                                                                                               | Procedure type                                                                  |
| 43845     | Gastric restrictive procedure with partial gastrectomy, pylorus-preserving duodenoileostomy and ileoileostomy (50 to 100 cm common channel) to limit absorption (biliopancreatic diversion with duodenal switch)                                                               | Gastric bypass                                                                  |
| 43843     | Gastric restrictive procedure, without gastric bypass, for morbid obesity; other than vertical-banded gastroplasty                                                                                                                                                             | Gastric bypass                                                                  |
| 43842     | Gastric restrictive procedure, without gastric bypass, for morbid obesity; vertical-banded gastroplasty                                                                                                                                                                        | Gastric bypass                                                                  |
| 43775     | Laparoscopy, surgical, gastric restrictive procedure; longitudinal gastrectomy (ie, sleeve gastrectomy)                                                                                                                                                                        | Gastric bypass                                                                  |
| 43887     | Gastric restrictive procedure - open; removal of subcutaneous port component only                                                                                                                                                                                              | Gastric bypass                                                                  |
| 43645     | Laparoscopy, surgical, gastric restrictive procedure; with gastric bypass and small intestine reconstruction to limit absorption                                                                                                                                               | Gastric bypass                                                                  |
| 43644     | Laparoscopy, surgical, gastric restrictive procedure; with gastric bypass and Roux-en-Y gastroenterostomy (roux limb 150 cm or less)                                                                                                                                           | Gastric bypass                                                                  |
| 43634     | Gastrectomy, partial, distal; with formation of intestinal pouch                                                                                                                                                                                                               | Gastric bypass                                                                  |
| 43633     | Gastrectomy, partial, distal; with Roux-en-Y reconstruction                                                                                                                                                                                                                    | Gastric bypass                                                                  |
| 43632     | Gastrectomy, partial, distal; with gastrojejunostomy                                                                                                                                                                                                                           | Gastric bypass                                                                  |
| 43631     | Gastrectomy, partial, distal; with gastroduodenostomy                                                                                                                                                                                                                          | Gastric bypass                                                                  |
| 43622     | Gastrectomy, total; with formation of intestinal pouch, any type                                                                                                                                                                                                               | Gastric bypass                                                                  |
| 43621     | Gastrectomy, total; with Roux-en-Y reconstruction                                                                                                                                                                                                                              | Gastric bypass                                                                  |
| 43620     | Gastrectomy, total; with esophagoenterostomy                                                                                                                                                                                                                                   | Gastric bypass                                                                  |
| 27687     | Gastrocnemius recession (eg, Strayer procedure)                                                                                                                                                                                                                                | Gastrocnemius recession                                                         |
| 43810     | Gastroduodenostomy                                                                                                                                                                                                                                                             | Gastroduodenostomy                                                              |
| 43361     | Gastrointestinal reconstruction for previous esophagectomy, for obstructing esophageal lesion or fistula, or for previous esophageal exclusion; with colon interposition or small intestine reconstruction, including intestine mobilization, preparation, and anastomosis(es) | Gastrointestinal reconstruction for previous esophagectomy                      |
| 43360     | Gastrointestinal reconstruction for previous esophagectomy, for obstructing esophageal lesion or fistula, or for previous esophageal exclusion; with stomach, with or without pyloroplasty                                                                                     | Gastrointestinal reconstruction for previous esophagectomy                      |
| 43825     | Gastrojejunostomy; with vagotomy, any type                                                                                                                                                                                                                                     | Gastrojejunostomy                                                               |
| 43820     | Gastrojejunostomy; without vagotomy                                                                                                                                                                                                                                            | Gastrojejunostomy                                                               |
| 43840     | Gastrorrhaphy, suture of perforated duodenal or gastric ulcer, wound, or injury                                                                                                                                                                                                | Gastrorrhaphy, suture of perforated duodenal or gastric ulcer, wound, or injury |
| 43832     | Gastrostomy - open; with construction of gastric tube (eg, Janeway procedure)                                                                                                                                                                                                  | Gastrostomy                                                                     |
| 43831     | Gastrostomy - open; neonatal, for feeding                                                                                                                                                                                                                                      | Gastrostomy                                                                     |
| 43830     | Gastrostomy - open; without construction of gastric tube (eg, Stamm procedure) (separate procedure)                                                                                                                                                                            | Gastrostomy                                                                     |
| 43502     | Gastrotomy; with suture repair of pre-existing esophagogastric laceration (eg, Mallory-Weiss)                                                                                                                                                                                  | Gastrotomy                                                                      |
| 43501     | Gastrotomy; with suture repair of bleeding ulcer                                                                                                                                                                                                                               | Gastrotomy                                                                      |
| 43500     | Gastrotomy; with exploration or foreign body removal                                                                                                                                                                                                                           | Gastrotomy                                                                      |
| 56805     | Clitoroplasty for intersex state                                                                                                                                                                                                                                               | Gender affirming procedure, clitoroplasty                                       |
| 55980     | Intersex surgery; female to male                                                                                                                                                                                                                                               | Gender affirming procedure, female to male                                      |
| 55970     | Intersex surgery; male to female                                                                                                                                                                                                                                               | Gender affirming procedure, male to female                                      |
| 57335     | Vaginoplasty for intersex state                                                                                                                                                                                                                                                | Gender affirming procedure, vaginoplasty                                        |
| 21123     | Genioplasty; sliding, augmentation with interpositional bone grafts (includes obtaining autografts)                                                                                                                                                                            | Genioplasty                                                                     |
| 21122     | Genioplasty; sliding osteotomies, 2 or more osteotomies (eg, wedge excision or bone wedge reversal for asymmetrical chin)                                                                                                                                                      | Genioplasty                                                                     |
| 21121     | Genioplasty; sliding osteotomy, single piece                                                                                                                                                                                                                                   | Genioplasty                                                                     |
| 21120     | Genioplasty; augmentation (autograft, allograft, prosthetic material)                                                                                                                                                                                                          | Genioplasty                                                                     |
| 41872     | Gingivoplasty, each quadrant (specify)                                                                                                                                                                                                                                         | Gingivoplasty                                                                   |
| 41155     | Glossectomy; composite procedure with resection floor of mouth, mandibular resection, and radical neck dissection (Commando type)                                                                                                                                              | Glossectomy                                                                     |
| 41153     | Glossectomy; composite procedure with resection floor of mouth, with suprahyoid neck dissection                                                                                                                                                                                | Glossectomy                                                                     |

| Continued |                                                                                                                                                                         |                                                                    |
|-----------|-------------------------------------------------------------------------------------------------------------------------------------------------------------------------|--------------------------------------------------------------------|
| Code      | Code description                                                                                                                                                        | Procedure type                                                     |
| 41145     | Glossectomy; complete or total, with or without tracheostomy, with unilateral radical neck dissection                                                                   | Glossectomy                                                        |
| 41135     | Glossectomy; partial, with unilateral radical neck dissection                                                                                                           | Glossectomy                                                        |
| 41150     | Glossectomy; composite procedure with resection floor of mouth and mandibular resection, without radical neck dissection                                                | Glossectomy                                                        |
| 41140     | Glossectomy; complete or total, with or without tracheostomy, without radical neck dissection                                                                           | Glossectomy                                                        |
| 41130     | Glossectomy; hemiglossectomy                                                                                                                                            | Glossectomy                                                        |
| 41120     | Glossectomy; less than 1/2 tongue                                                                                                                                       | Glossectomy                                                        |
| 65820     | Goniotomy                                                                                                                                                               | Goniotomy                                                          |
| 46753     | Graft (Thiersch operation) for rectal incontinence and/or prolapse                                                                                                      | Graft (Thiersch operation) for rectal incontinence and/or prolapse |
| 21235     | Graft; ear cartilage, autogenous, to nose or ear (includes obtaining graft)                                                                                             | Graft of bone or cartilage to face                                 |
| 21230     | Graft; rib cartilage, autogenous, to face, chin, nose or ear (includes obtaining graft)                                                                                 | Graft of bone or cartilage to face                                 |
| 21215     | Graft, bone; mandible (includes obtaining graft)                                                                                                                        | Graft of bone or cartilage to face                                 |
| 21210     | Graft, bone; nasal, maxillary or malar areas (includes obtaining graft)                                                                                                 | Graft of bone or cartilage to face                                 |
| 15773     | Grafting of autologous fat harvested by liposuction technique to face, eyelids, mouth, neck, ears, orbits, genitalia, hands, and/or feet; 25 cc or less injectate       | Graft of fat or other tissue                                       |
| 15771     | Grafting of autologous fat harvested by liposuction technique to trunk, breasts, scalp, arms, and/or legs; 50 cc or less injectate                                      | Graft of fat or other tissue                                       |
| 15770     | Graft; derma-fat-fascia                                                                                                                                                 | Graft of fat or other tissue                                       |
| 15769     | Grafting of autologous soft tissue, other, harvested by direct excision (eg, fat, dermis, fascia)                                                                       | Graft of fat or other tissue                                       |
| 15760     | Graft; composite (eg, full thickness of external ear or nasal ala), including primary closure, donor area                                                               | Graft of fat or other tissue                                       |
| 26556     | Transfer, free toe joint, with microvascular anastomosis                                                                                                                | Hand replantation                                                  |
| 26555     | Transfer, finger to another position without microvascular anastomosis                                                                                                  | Hand replantation                                                  |
| 26554     | Transfer, toe-to-hand with microvascular anastomosis; other than great toe, double                                                                                      | Hand replantation                                                  |
| 26553     | Transfer, toe-to-hand with microvascular anastomosis; other than great toe, single                                                                                      | Hand replantation                                                  |
| 26551     | Transfer, toe-to-hand with microvascular anastomosis; great toe wrap-around with bone graft                                                                             | Hand replantation                                                  |
| 26373     | Repair or advancement of profundus tendon, with intact superficialis tendon; secondary without free graft, each tendon                                                  | Hand tendon repair                                                 |
| 26372     | Repair or advancement of profundus tendon, with intact superficialis tendon; secondary with free graft (includes obtaining graft), each tendon                          | Hand tendon repair                                                 |
| 26370     | Repair or advancement of profundus tendon, with intact superficialis tendon; primary, each tendon                                                                       | Hand tendon repair                                                 |
| 26358     | Repair or advancement, flexor tendon, in zone 2 digital flexor tendon sheath (eg, no man's land); secondary, with free graft (includes obtaining graft), each tendon    | Hand tendon repair                                                 |
| 26357     | Repair or advancement, flexor tendon, in zone 2 digital flexor tendon sheath (eg, no man's land); secondary, without free graft, each tendon                            | Hand tendon repair                                                 |
| 26356     | Repair or advancement, flexor tendon, in zone 2 digital flexor tendon sheath (eg, no man's land); primary, without free graft, each tendon                              | Hand tendon repair                                                 |
| 26352     | Repair or advancement, flexor tendon, not in zone 2 digital flexor tendon sheath (eg, no man's land); secondary with free graft (includes obtaining graft), each tendon | Hand tendon repair                                                 |
| 26350     | Repair or advancement, flexor tendon, not in zone 2 digital flexor tendon sheath (eg, no man's land); primary or secondary without free graft, each tendon              | Hand tendon repair                                                 |
| 26499     | Correction claw finger, other methods                                                                                                                                   | Correction claw finger, other methods                              |
| 26510     | Cross intrinsic transfer, each tendon                                                                                                                                   | Hand, cross intrinsic transfer                                     |
| 26596     | Excision of constricting ring of finger, with multiple Z-plasties                                                                                                       | Hand, soft tissue reconstruction                                   |
| 15040     | Harvest of skin for tissue cultured skin autograft, 100 sq cm or less                                                                                                   | Harvest of skin for tissue cultured skin autograft                 |
| 33935     | Heart-lung transplant with recipient cardiectomy-pneumonectomy                                                                                                          | Heart and lung transplant                                          |
| 33945     | Heart transplant, with or without recipient cardiectomy                                                                                                                 | Heart transplant                                                   |
| 33940     | Donor cardiectomy (including cold preservation)                                                                                                                         | Heart transplant                                                   |
| 49655     | Laparoscopy, surgical, repair; incisional hernia (includes mesh insertion, when performed); incarcerated or strangulated                                                | Hernia repair, abdominal - laparoscopic                            |
| 49656     | Laparoscopy, surgical, repair; recurrent incisional hernia (includes mesh insertion, when performed); reducible                                                         | Hernia repair, abdominal - laparoscopic                            |

| Continued |                                                                                                                                                                                                                                                                               |                                                |
|-----------|-------------------------------------------------------------------------------------------------------------------------------------------------------------------------------------------------------------------------------------------------------------------------------|------------------------------------------------|
| Code      | Code description                                                                                                                                                                                                                                                              | Procedure type                                 |
| 49657     | Laparoscopy, surgical, repair, recurrent incisional hernia (includes mesh insertion, when performed); incarcerated or strangulated                                                                                                                                            | Hernia repair, abdominal - laparoscopic        |
| 49653     | Laparoscopy, surgical, repair, ventral, umbilical, spigelian or epigastric hernia (includes mesh insertion, when performed); incarcerated or strangulated                                                                                                                     | Hernia repair, abdominal - laparoscopic        |
| 49652     | Laparoscopy, surgical, repair, ventral, umbilical, spigelian or epigastric hernia (includes mesh insertion, when performed); reducible                                                                                                                                        | Hernia repair, abdominal - laparoscopic        |
| 49654     | Laparoscopy, surgical, repair, incisional hernia (includes mesh insertion, when performed); reducible                                                                                                                                                                         | Hernia repair, abdominal - laparoscopic        |
| 49572     | Repair epigastric hernia (eg, preperitoneal fat); incarcerated or strangulated                                                                                                                                                                                                | Hernia repair, abdominal - open                |
| 49590     | Repair spigelian hernia                                                                                                                                                                                                                                                       | Hernia repair, abdominal - open                |
| 49570     | Repair epigastric hernia (eg, preperitoneal fat); reducible (separate procedure)                                                                                                                                                                                              | Hernia repair, abdominal - open                |
| 49565     | Repair recurrent incisional or ventral hernia; reducible                                                                                                                                                                                                                      | Hernia repair, abdominal - open                |
| 49580     | Repair umbilical hernia, younger than age 5 years; reducible                                                                                                                                                                                                                  | Hernia repair, abdominal - open                |
| 49560     | Repair initial incisional or ventral hernia; reducible                                                                                                                                                                                                                        | Hernia repair, abdominal - open                |
| 49587     | Repair umbilical hernia, age 5 years or older; incarcerated or strangulated                                                                                                                                                                                                   | Hernia repair, abdominal - open                |
| 49566     | Repair recurrent incisional or ventral hernia; incarcerated or strangulated                                                                                                                                                                                                   | Hernia repair, abdominal - open                |
| 49585     | Repair umbilical hernia, age 5 years or older; reducible                                                                                                                                                                                                                      | Hernia repair, abdominal - open                |
| 49561     | Repair initial incisional or ventral hernia; incarcerated or strangulated                                                                                                                                                                                                     | Hernia repair, abdominal - open                |
| 49582     | Repair umbilical hernia, younger than age 5 years; incarcerated or strangulated                                                                                                                                                                                               | Hernia repair, abdominal - open                |
| 49651     | Laparoscopy, surgical; repair recurrent inguinal hernia                                                                                                                                                                                                                       | Hernia repair, inguinal/femoral - laparoscopic |
| 49650     | Laparoscopy, surgical; repair initial inguinal hernia                                                                                                                                                                                                                         | Hernia repair, inguinal/femoral - laparoscopic |
| 49557     | Repair recurrent femoral hernia; incarcerated or strangulated                                                                                                                                                                                                                 | Hernia repair, inguinal/femoral - open         |
| 49555     | Repair recurrent femoral hernia; reducible                                                                                                                                                                                                                                    | Hernia repair, inguinal/femoral - open         |
| 49553     | Repair initial femoral hernia, any age; incarcerated or strangulated                                                                                                                                                                                                          | Hernia repair, inguinal/femoral - open         |
| 49550     | Repair initial femoral hernia, any age; reducible                                                                                                                                                                                                                             | Hernia repair, inguinal/femoral - open         |
| 49525     | Repair inguinal hernia, sliding, any age                                                                                                                                                                                                                                      | Hernia repair, inguinal/femoral - open         |
| 49521     | Repair recurrent inguinal hernia, any age; incarcerated or strangulated                                                                                                                                                                                                       | Hernia repair, inguinal/femoral - open         |
| 49520     | Repair recurrent inguinal hernia, any age; reducible                                                                                                                                                                                                                          | Hernia repair, inguinal/femoral - open         |
| 49507     | Repair initial inguinal hernia, age 5 years or older; incarcerated or strangulated                                                                                                                                                                                            | Hernia repair, inguinal/femoral - open         |
| 49505     | Repair initial inguinal hernia, age 5 years or older; reducible                                                                                                                                                                                                               | Hernia repair, inguinal/femoral - open         |
| 49501     | Repair initial inguinal hernia, age 6 months to younger than 5 years, with or without hydrocelectomy; incarcerated or strangulated                                                                                                                                            | Hernia repair, inguinal/femoral - open         |
| 49500     | Repair initial inguinal hernia, age 6 months to younger than 5 years, with or without hydrocelectomy; reducible                                                                                                                                                               | Hernia repair, inguinal/femoral - open         |
| 49496     | Repair, initial inguinal hernia, full term infant younger than age 6 months, or preterm infant older than 50 weeks postconception age and younger than age 6 months at the time of surgery, with or without hydrocelectomy; incarcerated or strangulated                      | Hernia repair, inguinal/femoral - open         |
| 49495     | Repair, initial inguinal hernia, full term infant younger than age 6 months, or preterm infant older than 50 weeks postconception age and younger than age 6 months at the time of surgery, with or without hydrocelectomy; reducible                                         | Hernia repair, inguinal/femoral - open         |
| 49492     | Repair, initial inguinal hernia, preterm infant (younger than 37 weeks gestation at birth), performed from birth up to 50 weeks postconception age, with or without hydrocelectomy; incarcerated or strangulated                                                              | Hernia repair, inguinal/femoral - open         |
| 49491     | Repair, initial inguinal hernia, preterm infant (younger than 37 weeks gestation at birth), performed from birth up to 50 weeks postconception age, with or without hydrocelectomy; reducible                                                                                 | Hernia repair, inguinal/femoral - open         |
| 49540     | Repair lumbar hernia                                                                                                                                                                                                                                                          | Hernia repair, lumbar                          |
| 21685     | Hyoid myotomy and suspension                                                                                                                                                                                                                                                  | Hyoid myotomy and suspension                   |
| 61548     | Hypophysectomy or excision of pituitary tumor, transnasal or transeptal approach, nonstereotactic                                                                                                                                                                             | Hypophysectomy or excision of pituitary tumor  |
| 54352     | Repair of hypospadias cripple requiring extensive dissection and excision of previously constructed structures including re-release of chordee and reconstruction of urethra and penis by use of local skin as grafts and island flaps and skin brought in as flaps or grafts | Hypospadias repair                             |

| Continued |                                                                                                                                                                                                         |                                        |
|-----------|---------------------------------------------------------------------------------------------------------------------------------------------------------------------------------------------------------|----------------------------------------|
| Code      | Code description                                                                                                                                                                                        | Procedure type                         |
| 54348     | Repair of hypospadias complications (ie, fistula, stricture, diverticula); requiring extensive dissection and urethroplasty with flap, patch or tubed graft (includes urinary diversion)                | Hypospadias repair                     |
| 54344     | Repair of hypospadias complications (ie, fistula, stricture, diverticula); requiring mobilization of skin flaps and urethroplasty with flap or patch graft                                              | Hypospadias repair                     |
| 54340     | Repair of hypospadias complications (ie, fistula, stricture, diverticula); by closure, incision, or excision, simple                                                                                    | Hypospadias repair                     |
| 54336     | 1-stage perineal hypospadias repair requiring extensive dissection to correct chordee and urethroplasty by use of skin graft tube and/or island flap                                                    | Hypospadias repair                     |
| 54332     | 1-stage proximal penile or penoscrotal hypospadias repair requiring extensive dissection to correct chordee and urethroplasty by use of skin graft tube and/or island flap                              | Hypospadias repair                     |
| 54328     | 1-stage distal hypospadias repair (with or without chordee or circumcision); with extensive dissection to correct chordee and urethroplasty with local skin flaps, skin graft patch, and/or island flap | Hypospadias repair                     |
| 54326     | 1-stage distal hypospadias repair (with or without chordee or circumcision); with urethroplasty by local skin flaps and mobilization of urethra                                                         | Hypospadias repair                     |
| 54324     | 1-stage distal hypospadias repair (with or without chordee or circumcision); with urethroplasty by local skin flaps (eg, flip-flap, prepuccial flap)                                                    | Hypospadias repair                     |
| 54322     | 1-stage distal hypospadias repair (with or without chordee or circumcision); with simple meatal advancement (eg, Magpi, V-flap)                                                                         | Hypospadias repair                     |
| 54318     | Urethroplasty for third stage hypospadias repair to release penis from scrotum (eg, third stage Cecil repair)                                                                                           | Hypospadias repair                     |
| 54316     | Urethroplasty for second stage hypospadias repair (including urinary diversion) with free skin graft obtained from site other than genitalia                                                            | Hypospadias repair                     |
| 54312     | Urethroplasty for second stage hypospadias repair (including urinary diversion); greater than 3 cm                                                                                                      | Hypospadias repair                     |
| 54308     | Urethroplasty for second stage hypospadias repair (including urinary diversion); less than 3 cm                                                                                                         | Hypospadias repair                     |
| 58575     | Laparoscopy, surgical, total hysterectomy for resection of malignancy (tumor debulking), with omentectomy including salpingo-oophorectomy, unilateral or bilateral, when performed                      | Hysterectomy - laparoscopic or vaginal |
| 58573     | Laparoscopy, surgical, with total hysterectomy, for uterus greater than 250 g; with removal of tube(s) and/or ovary(s)                                                                                  | Hysterectomy - laparoscopic or vaginal |
| 58572     | Laparoscopy, surgical, with total hysterectomy, for uterus greater than 250 g;                                                                                                                          | Hysterectomy - laparoscopic or vaginal |
| 58571     | Laparoscopy, surgical, with total hysterectomy, for uterus 250 g or less; with removal of tube(s) and/or ovary(s)                                                                                       | Hysterectomy - laparoscopic or vaginal |
| 58570     | Laparoscopy, surgical, with total hysterectomy, for uterus 250 g or less;                                                                                                                               | Hysterectomy - laparoscopic or vaginal |
| 58554     | Laparoscopy, surgical, with vaginal hysterectomy, for uterus greater than 250 g; with removal of tube(s) and/or ovary(s)                                                                                | Hysterectomy - laparoscopic or vaginal |
| 58553     | Laparoscopy, surgical, with vaginal hysterectomy, for uterus greater than 250 g;                                                                                                                        | Hysterectomy - laparoscopic or vaginal |
| 58661     | Laparoscopy, surgical; with removal of adnexal structures (partial or total oophorectomy and/or salpingectomy)                                                                                          | Hysterectomy - laparoscopic or vaginal |
| 58552     | Laparoscopy, surgical, with vaginal hysterectomy, for uterus 250 g or less; with removal of tube(s) and/or ovary(s)                                                                                     | Hysterectomy - laparoscopic or vaginal |
| 58550     | Laparoscopy, surgical, with vaginal hysterectomy, for uterus 250 g or less;                                                                                                                             | Hysterectomy - laparoscopic or vaginal |
| 58548     | Laparoscopy, surgical, with radical hysterectomy, with bilateral total pelvic lymphadenectomy and para-aortic lymph node sampling (biopsy), with removal of tube(s) and ovary(s), if performed          | Hysterectomy - laparoscopic or vaginal |
| 58546     | Laparoscopy, surgical, myomectomy, excision; 5 or more intramural myomas and/or intramural myomas with total weight greater than 250 g                                                                  | Hysterectomy - laparoscopic or vaginal |
| 58545     | Laparoscopy, surgical, myomectomy, excision; 1 to 4 intramural myomas with total weight of 250 g or less and/or removal of surface myomas                                                               | Hysterectomy - laparoscopic or vaginal |
| 58544     | Laparoscopy, surgical, supracervical hysterectomy, for uterus greater than 250 g; with removal of tube(s) and/or ovary(s)                                                                               | Hysterectomy - laparoscopic or vaginal |
| 58543     | Laparoscopy, surgical, supracervical hysterectomy, for uterus greater than 250 g;                                                                                                                       | Hysterectomy - laparoscopic or vaginal |
| 58542     | Laparoscopy, surgical, supracervical hysterectomy, for uterus 250 g or less; with removal of tube(s) and/or ovary(s)                                                                                    | Hysterectomy - laparoscopic or vaginal |
| 58541     | Laparoscopy, surgical, supracervical hysterectomy, for uterus 250 g or less;                                                                                                                            | Hysterectomy - laparoscopic or vaginal |

| Continued |                                                                                                                                                                                                                                                                           |                                                           |
|-----------|---------------------------------------------------------------------------------------------------------------------------------------------------------------------------------------------------------------------------------------------------------------------------|-----------------------------------------------------------|
| Code      | Code description                                                                                                                                                                                                                                                          | Procedure type                                            |
| 58180     | Supracervical abdominal hysterectomy (subtotal hysterectomy), with or without removal of tube(s), with or without removal of ovary(s)                                                                                                                                     | Hysterectomy - open abdominal                             |
| 58152     | Total abdominal hysterectomy (corpus and cervix), with or without removal of tube(s), with or without removal of ovary(s); with colpo-urethrocytopexy (eg, Marshall-Marchetti-Krantz, Burch)                                                                              | Hysterectomy - open abdominal                             |
| 58150     | Total abdominal hysterectomy (corpus and cervix), with or without removal of tube(s), with or without removal of ovary(s);                                                                                                                                                | Hysterectomy - open abdominal                             |
| 58294     | Vaginal hysterectomy, for uterus greater than 250 g; with repair of enterocele                                                                                                                                                                                            | Hysterectomy - laparoscopic or vaginal                    |
| 58293     | Vaginal hysterectomy, for uterus greater than 250 g; with colpo- urethrocytopexy (Marshall-Marchetti-Krantz type, Pereyra type) with or without endoscopic control                                                                                                        | Hysterectomy - laparoscopic or vaginal                    |
| 58292     | Vaginal hysterectomy, for uterus greater than 250 g; with removal of tube(s) and/or ovary(s), with repair of enterocele                                                                                                                                                   | Hysterectomy - laparoscopic or vaginal                    |
| 58290     | Vaginal hysterectomy, for uterus greater than 250 g;                                                                                                                                                                                                                      | Hysterectomy - laparoscopic or vaginal                    |
| 58285     | Vaginal hysterectomy, radical (Schauta type operation)                                                                                                                                                                                                                    | Hysterectomy - laparoscopic or vaginal                    |
| 58280     | Vaginal hysterectomy, with total or partial vaginectomy; with repair of enterocele                                                                                                                                                                                        | Hysterectomy - laparoscopic or vaginal                    |
| 58291     | Vaginal hysterectomy, for uterus greater than 250 g; with removal of tube(s) and/or ovary(s)                                                                                                                                                                              | Hysterectomy - laparoscopic or vaginal                    |
| 58275     | Vaginal hysterectomy, with total or partial vaginectomy;                                                                                                                                                                                                                  | Hysterectomy - laparoscopic or vaginal                    |
| 58270     | Vaginal hysterectomy, for uterus 250 g or less; with repair of enterocele                                                                                                                                                                                                 | Hysterectomy - laparoscopic or vaginal                    |
| 58267     | Vaginal hysterectomy, for uterus 250 g or less; with colpo-urethrocytopexy (Marshall-Marchetti-Krantz type, Pereyra type) with or without endoscopic control                                                                                                              | Hysterectomy - laparoscopic or vaginal                    |
| 58263     | Vaginal hysterectomy, for uterus 250 g or less; with removal of tube(s), and/or ovary(s), with repair of enterocele                                                                                                                                                       | Hysterectomy - laparoscopic or vaginal                    |
| 58262     | Vaginal hysterectomy, for uterus 250 g or less; with removal of tube(s), and/or ovary(s)                                                                                                                                                                                  | Hysterectomy - laparoscopic or vaginal                    |
| 58260     | Vaginal hysterectomy, for uterus 250 g or less;                                                                                                                                                                                                                           | Hysterectomy - laparoscopic or vaginal                    |
| 58210     | Radical abdominal hysterectomy, with bilateral total pelvic lymphadenectomy and para-aortic lymph node sampling (biopsy), with or without removal of tube(s), with or without removal of ovary(s)                                                                         | Hysterectomy, extended - open                             |
| 58200     | Total abdominal hysterectomy, including partial vaginectomy, with para- aortic and pelvic lymph node sampling, with or without removal of tube(s), with or without removal of ovary(s)                                                                                    | Hysterectomy, extended - open                             |
| 58540     | Hysteroplasty, repair of uterine anomaly (Strassman type)                                                                                                                                                                                                                 | Hysteroplasty, repair of uterine anomaly (Strassman type) |
| 59350     | Hysterorrhaphy of ruptured uterus                                                                                                                                                                                                                                         | Hysterorrhaphy of ruptured uterus                         |
| 58520     | Hysterorrhaphy, repair of ruptured uterus (nonobstetrical)                                                                                                                                                                                                                | Hysterorrhaphy of ruptured uterus                         |
| 59100     | Hysterotomy, abdominal (eg, for hydatidiform mole, abortion)                                                                                                                                                                                                              | Hysterotomy                                               |
| 33275     | Transcatheter removal of permanent leadless pacemaker, right ventricular                                                                                                                                                                                                  | Implantable cardiac device procedures                     |
| 33274     | Transcatheter insertion or replacement of permanent leadless pacemaker, right ventricular, including imaging guidance (eg, fluoroscopy, venous ultrasound, ventriculography, femoral venography) and device evaluation (eg, interrogation or programming), when performed | Implantable cardiac device procedures                     |
| 33249     | Insertion or replacement of permanent pacing cardioverter-defibrillator system with transvenous lead(s), single or dual chamber                                                                                                                                           | Implantable cardiac device procedures                     |
| 33244     | Removal of single or dual chamber pacing cardioverter-defibrillator electrode(s); by transvenous extraction                                                                                                                                                               | Implantable cardiac device procedures                     |
| 33243     | Removal of single or dual chamber pacing cardioverter-defibrillator electrode(s); by thoracotomy                                                                                                                                                                          | Implantable cardiac device procedures                     |
| 33241     | Removal of pacing cardioverter-defibrillator pulse generator only                                                                                                                                                                                                         | Implantable cardiac device procedures                     |
| 33240     | Insertion of pacing cardioverter-defibrillator pulse generator only; with existing single lead                                                                                                                                                                            | Implantable cardiac device procedures                     |
| 33237     | Removal of permanent epicardial pacemaker and electrodes by thoracotomy; dual lead system                                                                                                                                                                                 | Implantable cardiac device procedures                     |
| 33236     | Removal of permanent epicardial pacemaker and electrodes by thoracotomy; single lead system, atrial or ventricular                                                                                                                                                        | Implantable cardiac device procedures                     |
| 33235     | Removal of transvenous pacemaker electrode(s); dual lead system                                                                                                                                                                                                           | Implantable cardiac device procedures                     |
| 33233     | Removal of permanent pacemaker pulse generator only                                                                                                                                                                                                                       | Implantable cardiac device procedures                     |
| 33231     | Insertion of pacing cardioverter-defibrillator pulse generator only; with existing multiple leads                                                                                                                                                                         | Implantable cardiac device procedures                     |
| 33230     | Insertion of pacing cardioverter-defibrillator pulse generator only; with existing dual leads                                                                                                                                                                             | Implantable cardiac device procedures                     |
| 33229     | Removal of permanent pacemaker pulse generator with replacement of pacemaker pulse generator; multiple lead system                                                                                                                                                        | Implantable cardiac device procedures                     |

| Continued |                                                                                                                                                                                                                                                                                     |                                                                                                                                             |
|-----------|-------------------------------------------------------------------------------------------------------------------------------------------------------------------------------------------------------------------------------------------------------------------------------------|---------------------------------------------------------------------------------------------------------------------------------------------|
| Code      | Code description                                                                                                                                                                                                                                                                    | Procedure type                                                                                                                              |
| 33228     | Removal of permanent pacemaker pulse generator with replacement of pacemaker pulse generator; dual lead system                                                                                                                                                                      | Implantable cardiac device procedures                                                                                                       |
| 33227     | Removal of permanent pacemaker pulse generator with replacement of pacemaker pulse generator; single lead system                                                                                                                                                                    | Implantable cardiac device procedures                                                                                                       |
| 33226     | Repositioning of previously implanted cardiac venous system (left ventricular) electrode (including removal, insertion and/or replacement of existing generator)                                                                                                                    | Implantable cardiac device procedures                                                                                                       |
| 33234     | Removal of transvenous pacemaker electrode(s); single lead system, atrial or ventricular                                                                                                                                                                                            | Implantable cardiac device procedures                                                                                                       |
| 33224     | Insertion of pacing electrode, cardiac venous system, for left ventricular pacing, with attachment to previously placed pacemaker or pacing cardioverter-defibrillator pulse generator (including revision of pocket, removal, insertion, and/or replacement of existing generator) | Implantable cardiac device procedures                                                                                                       |
| 33223     | Relocation of skin pocket for cardioverter-defibrillator                                                                                                                                                                                                                            | Implantable cardiac device procedures                                                                                                       |
| 33222     | Relocation of skin pocket for pacemaker                                                                                                                                                                                                                                             | Implantable cardiac device procedures                                                                                                       |
| 33221     | Insertion of pacemaker pulse generator only; with existing multiple leads                                                                                                                                                                                                           | Implantable cardiac device procedures                                                                                                       |
| 33238     | Removal of permanent transvenous electrode(s) by thoracotomy                                                                                                                                                                                                                        | Implantable cardiac device procedures                                                                                                       |
| 33220     | Repair of 2 transvenous electrodes for permanent pacemaker or pacing cardioverter-defibrillator                                                                                                                                                                                     | Implantable cardiac device procedures                                                                                                       |
| 33218     | Repair of single transvenous electrode, permanent pacemaker or pacing cardioverter-defibrillator                                                                                                                                                                                    | Implantable cardiac device procedures                                                                                                       |
| 33217     | Insertion of 2 transvenous electrodes, permanent pacemaker or cardioverter-defibrillator                                                                                                                                                                                            | Implantable cardiac device procedures                                                                                                       |
| 33216     | Insertion of a single transvenous electrode, permanent pacemaker or cardioverter-defibrillator                                                                                                                                                                                      | Implantable cardiac device procedures                                                                                                       |
| 33215     | Repositioning of previously implanted transvenous pacemaker or pacing cardioverter-defibrillator (right atrial or right ventricular) electrode                                                                                                                                      | Implantable cardiac device procedures                                                                                                       |
| 33214     | Upgrade of implanted pacemaker system, conversion of single chamber system to dual chamber system (includes removal of previously placed pulse generator, testing of existing lead, insertion of new lead, insertion of new pulse generator)                                        | Implantable cardiac device procedures                                                                                                       |
| 33213     | Insertion of pacemaker pulse generator only; with existing dual leads                                                                                                                                                                                                               | Implantable cardiac device procedures                                                                                                       |
| 33212     | Insertion of pacemaker pulse generator only; with existing single lead                                                                                                                                                                                                              | Implantable cardiac device procedures                                                                                                       |
| 33211     | Insertion or replacement of temporary transvenous dual chamber pacing electrodes (separate procedure)                                                                                                                                                                               | Implantable cardiac device procedures                                                                                                       |
| 33210     | Insertion or replacement of temporary transvenous single chamber cardiac electrode or pacemaker catheter (separate procedure)                                                                                                                                                       | Implantable cardiac device procedures                                                                                                       |
| 33208     | Insertion of new or replacement of permanent pacemaker with transvenous electrode(s); atrial and ventricular                                                                                                                                                                        | Implantable cardiac device procedures                                                                                                       |
| 33207     | Insertion of new or replacement of permanent pacemaker with transvenous electrode(s); ventricular                                                                                                                                                                                   | Implantable cardiac device procedures                                                                                                       |
| 33206     | Insertion of new or replacement of permanent pacemaker with transvenous electrode(s); atrial                                                                                                                                                                                        | Implantable cardiac device procedures                                                                                                       |
| 33203     | Insertion of epicardial electrode(s); endoscopic approach (eg, thoracoscopy, pericardioscopy)                                                                                                                                                                                       | Implantable cardiac device procedures                                                                                                       |
| 33202     | Insertion of epicardial electrode(s); open incision (eg, thoracotomy, median sternotomy, subxiphoid approach)                                                                                                                                                                       | Implantable cardiac device procedures                                                                                                       |
| 33928     | Removal and replacement of total replacement heart system (artificial heart)                                                                                                                                                                                                        | Implantation of artificial heart                                                                                                            |
| 33927     | Implantation of a total replacement heart system (artificial heart) with recipient cardiectomy                                                                                                                                                                                      | Implantation of artificial heart                                                                                                            |
| 31400     | Arytenoidectomy or arytenoidopexy, external approach                                                                                                                                                                                                                                | Implantation of artificial heart                                                                                                            |
| 36262     | Removal of implanted intra-arterial infusion pump                                                                                                                                                                                                                                   | Implantation of chemotherapy device                                                                                                         |
| 36261     | Revision of implanted intra-arterial infusion pump                                                                                                                                                                                                                                  | Implantation of chemotherapy device                                                                                                         |
| 36260     | Insertion of implantable intra-arterial infusion pump (eg, for chemotherapy of liver)                                                                                                                                                                                               | Implantation of chemotherapy device                                                                                                         |
| 64582     | Open implantation of hypoglossal nerve neurostimulator array, pulse generator, and distal respiratory sensor electrode or electrode array                                                                                                                                           | Implantation of hypoglossal nerve neurostimulator array, pulse generator, and distal respiratory sensor electrode or electrode array - open |
| 65785     | Implantation of intrastromal corneal ring segments                                                                                                                                                                                                                                  | Implantation of intrastromal corneal ring segments                                                                                          |
| 67027     | Implantation of intravitreal drug delivery system (eg, ganciclovir implant), includes concomitant removal of vitreous                                                                                                                                                               | Implantation of intravitreal drug delivery system, includes concomitant removal of vitreous                                                 |

| Continued |                                                                                                                                                                                                  |                                                                                                   |
|-----------|--------------------------------------------------------------------------------------------------------------------------------------------------------------------------------------------------|---------------------------------------------------------------------------------------------------|
| Code      | Code description                                                                                                                                                                                 | Procedure type                                                                                    |
| 69710     | Implantation or replacement of electromagnetic bone conduction hearing device in temporal bone                                                                                                   | Implantation or replacement of electromagnetic bone conduction hearing device in temporal bone    |
| 69727     | Removal, osseointegrated implant, skull; with magnetic transcutaneous attachment to external speech processor                                                                                    | Implantation, removal, or replacement of osseointegrated implant, temporal bone                   |
| 69726     | Removal, osseointegrated implant, skull; with percutaneous attachment to external speech processor                                                                                               | Implantation, removal, or replacement of osseointegrated implant, temporal bone                   |
| 69719     | Revision or replacement (including removal of existing device), osseointegrated implant, skull; with magnetic transcutaneous attachment to external speech processor                             | Implantation, removal, or replacement of osseointegrated implant, temporal bone                   |
| 69718     | Replacement (including removal of existing device), osseointegrated implant, temporal bone, with percutaneous attachment to external speech processor/cochlear stimulator; with mastoidectomy    | Implantation, removal, or replacement of osseointegrated implant, temporal bone                   |
| 69717     | Replacement (including removal of existing device), osseointegrated implant, temporal bone, with percutaneous attachment to external speech processor/cochlear stimulator; without mastoidectomy | Implantation, removal, or replacement of osseointegrated implant, temporal bone                   |
| 69716     | Implantation, osseointegrated implant, skull; with magnetic transcutaneous attachment to external speech processor                                                                               | Implantation, removal, or replacement of osseointegrated implant, temporal bone                   |
| 69715     | Implantation, osseointegrated implant, temporal bone, with percutaneous attachment to external speech processor/cochlear stimulator; with mastoidectomy                                          | Implantation, removal, or replacement of osseointegrated implant, temporal bone                   |
| 69714     | Implantation, osseointegrated implant, temporal bone, with percutaneous attachment to external speech processor/cochlear stimulator; without mastoidectomy                                       | Implantation, removal, or replacement of osseointegrated implant, temporal bone                   |
| 43648     | Laparoscopy, surgical; revision or removal of gastric neurostimulator electrodes, antrum                                                                                                         | Implantation, replacement, revision, removal of gastric neurostimulator electrodes - laparoscopic |
| 43647     | Laparoscopy, surgical; implantation or replacement of gastric neurostimulator electrodes, antrum                                                                                                 | Implantation, replacement, revision, removal of gastric neurostimulator electrodes - laparoscopic |
| 43882     | Revision or removal of gastric neurostimulator electrodes, antrum - open                                                                                                                         | Implantation, replacement, revision, removal of gastric neurostimulator electrodes - open         |
| 43881     | Implantation or replacement of gastric neurostimulator electrodes, antrum - open                                                                                                                 | Implantation, replacement, revision, removal of gastric neurostimulator electrodes - open         |
| 22015     | Incision and drainage - open, of deep abscess (subfascial), posterior spine; lumbar, sacral, or lumbosacral                                                                                      | Incision and drainage of abscess in posterior spine                                               |
| 22010     | Incision and drainage - open, of deep abscess (subfascial), posterior spine; cervical, thoracic, or cervicothoracic                                                                              | Incision and drainage of abscess in posterior spine                                               |
| 41018     | Extraoral incision and drainage of abscess, cyst, or hematoma of floor of mouth; masticator space                                                                                                | Incision and drainage of abscess, cyst, or hematoma of tongue or floor of mouth                   |
| 41017     | Extraoral incision and drainage of abscess, cyst, or hematoma of floor of mouth; submandibular                                                                                                   | Incision and drainage of abscess, cyst, or hematoma of tongue or floor of mouth                   |
| 41016     | Extraoral incision and drainage of abscess, cyst, or hematoma of floor of mouth; submental                                                                                                       | Incision and drainage of abscess, cyst, or hematoma of tongue or floor of mouth                   |
| 42725     | Incision and drainage abscess; retropharyngeal or parapharyngeal, external approach                                                                                                              | Incision and drainage of abscess; retropharyngeal or parapharyngeal                               |
| 44901     | Incision and drainage of appendiceal abscess; percutaneous                                                                                                                                       | Incision and drainage of appendiceal abscess - laparoscopic                                       |
| 44900     | Incision and drainage of appendiceal abscess - open                                                                                                                                              | Incision and drainage of appendiceal abscess - open                                               |
| 46060     | Incision and drainage of ischiorectal or intramural abscess, with fistulectomy or fistulotomy, submuscular, with or without placement of seton                                                   | Incision and drainage of rectal, perirectal, or perianal abscess                                  |
| 20005     | Incision and drainage of soft tissue abscess, subfascial (ie, involves the soft tissue below the deep fascia)                                                                                    | Incision and drainage of soft tissue abscess, subfascial                                          |
| 27603     | Incision and drainage, leg or ankle; deep abscess or hematoma                                                                                                                                    | Incision and drainage, leg or ankle                                                               |
| 26990     | Incision and drainage, pelvis or hip joint area; deep abscess or hematoma                                                                                                                        | Incision and drainage, pelvis or hip joint area                                                   |
| 27303     | Incision, deep, with opening of bone cortex, femur or knee (eg, osteomyelitis or bone abscess)                                                                                                   | Incision and drainage, thigh or knee region                                                       |

| Continued |                                                                                                                                                                                                                                                                                                                                         |                                                                                                                  |
|-----------|-----------------------------------------------------------------------------------------------------------------------------------------------------------------------------------------------------------------------------------------------------------------------------------------------------------------------------------------|------------------------------------------------------------------------------------------------------------------|
| Code      | Code description                                                                                                                                                                                                                                                                                                                        | Procedure type                                                                                                   |
| 27301     | Incision and drainage, deep abscess, bursa, or hematoma, thigh or knee region                                                                                                                                                                                                                                                           | Incision and drainage, thigh or knee region                                                                      |
| 64568     | Incision for implantation of cranial nerve (eg, vagus nerve) neurostimulator electrode array and pulse generator                                                                                                                                                                                                                        | Incision for implantation of cranial nerve (eg, vagus nerve) neurostimulator electrode array and pulse generator |
| 64580     | Incision for implantation of neurostimulator electrode array; neuromuscular                                                                                                                                                                                                                                                             | Incision for implantation of neurostimulator electrode array                                                     |
| 64575     | Incision for implantation of neurostimulator electrode array; peripheral nerve (excludes sacral nerve)                                                                                                                                                                                                                                  | Incision for implantation of neurostimulator electrode array                                                     |
| 64581     | Incision for implantation of neurostimulator electrode array; sacral nerve (transforaminal placement)                                                                                                                                                                                                                                   | Incision for implantation of neurostimulator electrode array                                                     |
| 28005     | Incision, bone cortex (eg, osteomyelitis or bone abscess), foot                                                                                                                                                                                                                                                                         | Incision of bone cortex, pelvis and lower extremity                                                              |
| 27607     | Incision (eg, osteomyelitis or bone abscess), leg or ankle                                                                                                                                                                                                                                                                              | Incision of bone cortex, pelvis and lower extremity                                                              |
| 26992     | Incision, bone cortex, pelvis and/or hip joint (eg, osteomyelitis or bone abscess)                                                                                                                                                                                                                                                      | Incision of bone cortex, pelvis and lower extremity                                                              |
| 26034     | Incision, bone cortex, hand or finger (eg, osteomyelitis or bone abscess)                                                                                                                                                                                                                                                               | Incision of bone cortex, shoulder and upper extremity                                                            |
| 25035     | Incision, deep, bone cortex, forearm and/or wrist (eg, osteomyelitis or bone abscess)                                                                                                                                                                                                                                                   | Incision of bone cortex, shoulder and upper extremity                                                            |
| 23935     | Incision, deep, with opening of bone cortex (eg, for osteomyelitis or bone abscess), humerus or elbow                                                                                                                                                                                                                                   | Incision of bone cortex, shoulder and upper extremity                                                            |
| 23035     | Incision, bone cortex (eg, osteomyelitis or bone abscess), shoulder area                                                                                                                                                                                                                                                                | Incision of bone cortex, shoulder and upper extremity                                                            |
| 21510     | Incision, deep, with opening of bone cortex (eg, for osteomyelitis or bone abscess), thorax                                                                                                                                                                                                                                             | Incision of neck or thorax                                                                                       |
| 21502     | Incision and drainage, deep abscess or hematoma, soft tissues of neck or thorax; with partial rib ostectomy                                                                                                                                                                                                                             | Incision of neck or thorax                                                                                       |
| 46070     | Incision, anal septum (infant)                                                                                                                                                                                                                                                                                                          | Incision of anal septum (infant)                                                                                 |
| 25001     | Incision, flexor tendon sheath, wrist (eg, flexor carpi radialis)                                                                                                                                                                                                                                                                       | Incision of tendon sheath of wrist                                                                               |
| 25000     | Incision, extensor tendon sheath, wrist (eg, deQuervains disease)                                                                                                                                                                                                                                                                       | Incision of tendon sheath of wrist                                                                               |
| 59857     | Induced abortion, by 1 or more vaginal suppositories (eg, prostaglandin) with or without cervical dilation (eg, laminaria), including hospital admission and visits, delivery of fetus and secundines; with hysterotomy (failed medical evacuation)                                                                                     | Induced abortion                                                                                                 |
| 59852     | Induced abortion, by 1 or more intra-amniotic injections (amniocentesis- injections), including hospital admission and visits, delivery of fetus and secundines; with hysterotomy (failed intra-amniotic injection)                                                                                                                     | Induced abortion                                                                                                 |
| 30140     | Submucous resection inferior turbinate, partial or complete, any method                                                                                                                                                                                                                                                                 | Inferior turbinate resection or excision                                                                         |
| 30130     | Excision inferior turbinate, partial or complete, any method                                                                                                                                                                                                                                                                            | Inferior turbinate resection or excision                                                                         |
| 61591     | Infratemporal post-auricular approach to middle cranial fossa (internal auditory meatus, petrous apex, tentorium, cavernous sinus, parasellar area, infratemporal fossa) including mastoidectomy, resection of sigmoid sinus, with or without decompression and/or mobilization of contents of auditory canal or petrous carotid artery | Infratemporal pre-auricular approach to middle cranial fossa                                                     |
| 61590     | Infratemporal pre-auricular approach to middle cranial fossa (parapharyngeal space, infratemporal and midline skull base, nasopharynx), with or without disarticulation of the mandible, including parotidectomy, craniotomy, decompression and/or mobilization of the facial nerve and/or petrous carotid artery                       | Infratemporal pre-auricular approach to middle cranial fossa                                                     |
| 67515     | Injection of medication or other substance into Tenon's capsule                                                                                                                                                                                                                                                                         | Injection of medication or other substance into Tenon's capsule                                                  |
| 53445     | Insertion of inflatable urethral/bladder neck sphincter, including placement of pump, reservoir, and cuff                                                                                                                                                                                                                               | Insertion of inflatable urethral/bladder neck sphincter, including placement of pump, reservoir, and cuff        |
| 22869     | Insertion of interlaminar/interspinous process stabilization/distraction device, without open decompression or fusion, including image guidance when performed, lumbar; single level                                                                                                                                                    | Insertion of interlaminar/interspinous process stabilization/distraction device                                  |
| 22867     | Insertion of interlaminar/interspinous process stabilization/distraction device, without fusion, including image guidance when performed, with open decompression, lumbar; single level                                                                                                                                                 | Insertion of interlaminar/interspinous process stabilization/distraction device                                  |
| 66985     | Insertion of intraocular lens prosthesis (secondary implant), not associated with concurrent cataract removal                                                                                                                                                                                                                           | Insertion of intraocular lens prosthesis, not associated with concurrent cataract removal                        |

| Continued |                                                                                                                                                                                                                                                                                                                                                                                                                                                                                                                                                                                                               |                                                                                                                                              |
|-----------|---------------------------------------------------------------------------------------------------------------------------------------------------------------------------------------------------------------------------------------------------------------------------------------------------------------------------------------------------------------------------------------------------------------------------------------------------------------------------------------------------------------------------------------------------------------------------------------------------------------|----------------------------------------------------------------------------------------------------------------------------------------------|
| Code      | Code description                                                                                                                                                                                                                                                                                                                                                                                                                                                                                                                                                                                              | Procedure type                                                                                                                               |
| 65140     | Insertion of ocular implant secondary; after enucleation, muscles attached to implant                                                                                                                                                                                                                                                                                                                                                                                                                                                                                                                         | Insertion of ocular implants                                                                                                                 |
| 65135     | Insertion of ocular implant secondary; after enucleation, muscles not attached to implant                                                                                                                                                                                                                                                                                                                                                                                                                                                                                                                     | Insertion of ocular implants                                                                                                                 |
| 65130     | Insertion of ocular implant secondary; after evisceration, in scleral shell                                                                                                                                                                                                                                                                                                                                                                                                                                                                                                                                   | Insertion of ocular implants                                                                                                                 |
| 67550     | Orbital implant (implant outside muscle cone); insertion                                                                                                                                                                                                                                                                                                                                                                                                                                                                                                                                                      | Insertion of orbital implant                                                                                                                 |
| 49425     | Insertion of peritoneal-venous shunt                                                                                                                                                                                                                                                                                                                                                                                                                                                                                                                                                                          | Insertion of peritoneal-venous shunt                                                                                                         |
| 61215     | Insertion of subcutaneous reservoir; pump or continuous infusion system for connection to ventricular catheter                                                                                                                                                                                                                                                                                                                                                                                                                                                                                                | Insertion of subcutaneous reservoir; pump or continuous infusion system for connection to ventricular catheter (CNS)                         |
| 53444     | Insertion of tandem cuff (dual cuff)                                                                                                                                                                                                                                                                                                                                                                                                                                                                                                                                                                          | Insertion of tandem cuff                                                                                                                     |
| 54660     | Insertion of testicular prosthesis (separate procedure)                                                                                                                                                                                                                                                                                                                                                                                                                                                                                                                                                       | Insertion of testicular prosthesis                                                                                                           |
| 36835     | Insertion of Thomas shunt (separate procedure)                                                                                                                                                                                                                                                                                                                                                                                                                                                                                                                                                                | Insertion of Thomas shunt                                                                                                                    |
| 25430     | Insertion of vascular pedicle into carpal bone (eg, Hori procedure)                                                                                                                                                                                                                                                                                                                                                                                                                                                                                                                                           | Insertion of vascular pedicle into carpal bone (eg, Hori procedure)                                                                          |
| 33979     | Insertion of ventricular assist device, implantable intracorporeal, single ventricle                                                                                                                                                                                                                                                                                                                                                                                                                                                                                                                          | Insertion of ventricular assist device                                                                                                       |
| 33976     | Insertion of ventricular assist device; extracorporeal, biventricular                                                                                                                                                                                                                                                                                                                                                                                                                                                                                                                                         | Insertion of ventricular assist device                                                                                                       |
| 33975     | Insertion of ventricular assist device; extracorporeal, single ventricle                                                                                                                                                                                                                                                                                                                                                                                                                                                                                                                                      | Insertion of ventricular assist device                                                                                                       |
| 61886     | Insertion or replacement of cranial neurostimulator pulse generator or receiver, direct or inductive coupling; with connection to 2 or more electrode arrays                                                                                                                                                                                                                                                                                                                                                                                                                                                  | Insertion or replacement of cranial neurostimulator pulse generator or receiver                                                              |
| 61885     | Insertion or replacement of cranial neurostimulator pulse generator or receiver, direct or inductive coupling; with connection to a single electrode array                                                                                                                                                                                                                                                                                                                                                                                                                                                    | Insertion or replacement of cranial neurostimulator pulse generator or receiver                                                              |
| 64590     | Insertion or replacement of peripheral or gastric neurostimulator pulse generator or receiver, direct or inductive coupling                                                                                                                                                                                                                                                                                                                                                                                                                                                                                   | Insertion or replacement of peripheral or gastric neurostimulator pulse generator or receiver, direct or inductive coupling                  |
| 33973     | Insertion of intra-aortic balloon assist device through the ascending aorta                                                                                                                                                                                                                                                                                                                                                                                                                                                                                                                                   | Insertion of intra-aortic balloon assist device                                                                                              |
| 33970     | Insertion of intra-aortic balloon assist device through the femoral artery - open approach                                                                                                                                                                                                                                                                                                                                                                                                                                                                                                                    | Insertion of intra-aortic balloon assist device                                                                                              |
| 93656     | Comprehensive electrophysiologic evaluation including transseptal catheterizations, insertion and repositioning of multiple electrode catheters with induction or attempted induction of an arrhythmia including left or right atrial pacing/recording when necessary, right ventricular pacing/recording when necessary and His bundle recording when necessary with intracardiac catheter ablation of atrial fibrillation by pulmonary vein isolation                                                                                                                                                       | Interventional cardiology; Comprehensive electrophysiologic evaluation including insertion and repositioning of multiple electrode catheters |
| 93654     | Comprehensive electrophysiologic evaluation including insertion and repositioning of multiple electrode catheters with induction or attempted induction of an arrhythmia with right atrial pacing and recording, right ventricular pacing and recording (when necessary), and His bundle recording (when necessary) with intracardiac catheter ablation of arrhythmogenic focus; with treatment of ventricular tachycardia or focus of ventricular ectopy including intracardiac electrophysiologic 3D mapping, when performed, and left ventricular pacing and recording, when performed                     | Interventional cardiology; Comprehensive electrophysiologic evaluation including insertion and repositioning of multiple electrode catheters |
| 93653     | Comprehensive electrophysiologic evaluation including insertion and repositioning of multiple electrode catheters with induction or attempted induction of an arrhythmia with right atrial pacing and recording, right ventricular pacing and recording (when necessary) and His bundle recording (when necessary) with intracardiac catheter ablation of arrhythmogenic focus; with treatment of supraventricular tachycardia by ablation of fast or slow atrioventricular pathway, accessory atrioventricular connection, cavo- tricuspid isthmus or other single atrial focus or source of atrial re-entry | Interventional cardiology; Comprehensive electrophysiologic evaluation including insertion and repositioning of multiple electrode catheters |
| 44605     | Suture of large intestine (colorrhaphy) for perforated ulcer, diverticulum, wound, injury or rupture (single or multiple perforations); with colostomy                                                                                                                                                                                                                                                                                                                                                                                                                                                        | Intestinal procedure, colon repair without or without ostomy for ulcer, diverticulum, wound, or injury                                       |
| 44604     | Suture of large intestine (colorrhaphy) for perforated ulcer, diverticulum, wound, injury or rupture (single or multiple perforations); without colostomy                                                                                                                                                                                                                                                                                                                                                                                                                                                     | Intestinal procedure, colon repair without or without ostomy for ulcer, diverticulum, wound, or injury                                       |
| 45136     | Excision of ileoanal reservoir with ileostomy                                                                                                                                                                                                                                                                                                                                                                                                                                                                                                                                                                 | Intestinal procedure, excision of ileoanal reservoir with ileostomy                                                                          |
| 44111     | Excision of 1 or more lesions of small or large intestine not requiring anastomosis, exteriorization, or fistulization; multiple enterotomies                                                                                                                                                                                                                                                                                                                                                                                                                                                                 | Intestinal procedure, excision of lesion without anastomosis, exteriorization or fistulization                                               |

| Continued |                                                                                                                                                       |                                                                                                |
|-----------|-------------------------------------------------------------------------------------------------------------------------------------------------------|------------------------------------------------------------------------------------------------|
| Code      | Code description                                                                                                                                      | Procedure type                                                                                 |
| 44110     | Excision of 1 or more lesions of small or large intestine not requiring anastomosis, exteriorization, or fistulization; single enterotomy             | Intestinal procedure, excision of lesion without anastomosis, exteriorization or fistulization |
| 44316     | Continent ileostomy (Kock procedure) (separate procedure)                                                                                             | Intestinal procedure, ileostomy or jejunostomy                                                 |
| 44314     | Revision of ileostomy; complicated (reconstruction in-depth) (separate procedure)                                                                     | Intestinal procedure, ileostomy or jejunostomy                                                 |
| 44312     | Revision of ileostomy; simple (release of superficial scar) (separate procedure)                                                                      | Intestinal procedure, ileostomy or jejunostomy                                                 |
| 44310     | Ileostomy or jejunostomy, non-tube                                                                                                                    | Intestinal procedure, ileostomy or jejunostomy                                                 |
| 44050     | Reduction of volvulus, intussusception, internal hernia, by laparotomy                                                                                | Intestinal procedure, intestinal hernia and volvulus derotation open laparotomy                |
| 44055     | Correction of malrotation by lysis of duodenal bands and/or reduction of midgut volvulus (eg, Ladd procedure)                                         | Intestinal procedure, lysis of adhesions                                                       |
| 50825     | Continent diversion, including intestine anastomosis using any segment of small and/or large intestine (Kock pouch or Camey enterocystoplasty)        | Intestinal procedure, ostomy creation                                                          |
| 44680     | Intestinal plication (separate procedure)                                                                                                             | Intestinal procedure, plication                                                                |
| 44602     | Suture of small intestine (enterorrhaphy) for perforated ulcer, diverticulum, wound, injury or rupture; single perforation                            | Intestinal procedure, repair                                                                   |
| 44603     | Suture of small intestine (enterorrhaphy) for perforated ulcer, diverticulum, wound, injury or rupture; multiple perforations                         | Intestinal procedure, repair                                                                   |
| 44202     | Laparoscopy, surgical; enterectomy, resection of small intestine, single resection and anastomosis                                                    | Intestinal procedure, resection and anastomosis - laparoscopic                                 |
| 44130     | Enteroenterostomy, anastomosis of intestine, with or without cutaneous enterostomy (separate procedure)                                               | Intestinal procedure, resection and anastomosis - open                                         |
| 44127     | Enterectomy, resection of small intestine for congenital atresia, single resection and anastomosis of proximal segment of intestine; with tapering    | Intestinal procedure, resection and anastomosis - open                                         |
| 44126     | Enterectomy, resection of small intestine for congenital atresia, single resection and anastomosis of proximal segment of intestine; without tapering | Intestinal procedure, resection and anastomosis - open                                         |
| 44120     | Enterectomy, resection of small intestine; single resection and anastomosis                                                                           | Intestinal procedure, resection and anastomosis - open                                         |
| 44626     | Closure of enterostomy, large or small intestine; with resection and colorectal anastomosis (eg, closure of Hartmann type procedure)                  | Intestinal procedure, resection and closure of enterostomy                                     |
| 44625     | Closure of enterostomy, large or small intestine; with resection and anastomosis other than colorectal                                                | Intestinal procedure, resection and closure of enterostomy                                     |
| 44125     | Enterectomy, resection of small intestine; with enterostomy                                                                                           | Intestinal procedure, resection and enterostomy                                                |
| 44615     | Intestinal stricturoplasty (enterotomy and enterorrhaphy) with or without dilation, for intestinal obstruction                                        | Intestinal procedure, stricturoplasty                                                          |
| 61710     | Surgery of aneurysm, vascular malformation or carotid-cavernous fistula; by intra-arterial embolization, injection procedure, or balloon catheter     | Intracranial aneurysm repair - endovascular                                                    |
| 61708     | Surgery of aneurysm, vascular malformation or carotid-cavernous fistula; by intracranial electrothrombosis                                            | Intracranial aneurysm repair - open                                                            |
| 61705     | Surgery of aneurysm, vascular malformation or carotid-cavernous fistula; by intracranial and cervical occlusion of carotid artery                     | Intracranial aneurysm repair - open                                                            |
| 61703     | Surgery of intracranial aneurysm, cervical approach by application of occluding clamp to cervical carotid artery (Selverstone-Crutchfield type)       | Intracranial aneurysm repair - open                                                            |
| 61702     | Surgery of simple intracranial aneurysm, intracranial approach; vertebrobasilar circulation                                                           | Intracranial aneurysm repair - open                                                            |
| 61700     | Surgery of simple intracranial aneurysm, intracranial approach; carotid circulation                                                                   | Intracranial aneurysm repair - open                                                            |
| 61698     | Surgery of complex intracranial aneurysm, intracranial approach; vertebrobasilar circulation                                                          | Intracranial aneurysm repair - open                                                            |
| 61697     | Surgery of complex intracranial aneurysm, intracranial approach; carotid circulation                                                                  | Intracranial aneurysm repair - open                                                            |
| 61692     | Surgery of intracranial arteriovenous malformation; dural, complex                                                                                    | Intracranial arteriovenous malformation repair                                                 |
| 61690     | Surgery of intracranial arteriovenous malformation; dural, simple                                                                                     | Intracranial arteriovenous malformation repair                                                 |
| 61686     | Surgery of intracranial arteriovenous malformation; infratentorial, complex                                                                           | Intracranial arteriovenous malformation repair                                                 |

| Continued |                                                                                                                                                                                                       |                                                   |
|-----------|-------------------------------------------------------------------------------------------------------------------------------------------------------------------------------------------------------|---------------------------------------------------|
| Code      | Code description                                                                                                                                                                                      | Procedure type                                    |
| 61684     | Surgery of intracranial arteriovenous malformation; infratentorial, simple                                                                                                                            | Intracranial arteriovenous malformation repair    |
| 61682     | Surgery of intracranial arteriovenous malformation; supratentorial, complex                                                                                                                           | Intracranial arteriovenous malformation repair    |
| 61680     | Surgery of intracranial arteriovenous malformation; supratentorial, simple                                                                                                                            | Intracranial arteriovenous malformation repair    |
| 67028     | Intravitreal injection of a pharmacologic agent (separate procedure)                                                                                                                                  | Intravitreal injection of a pharmacologic agent   |
| 66635     | Iridectomy, with corneoscleral or corneal section; optical (separate procedure)                                                                                                                       | Iridectomy, with corneoscleral or corneal section |
| 66630     | Iridectomy, with corneoscleral or corneal section; sector for glaucoma (separate procedure)                                                                                                           | Iridectomy, with corneoscleral or corneal section |
| 66625     | Iridectomy, with corneoscleral or corneal section; peripheral for glaucoma (separate procedure)                                                                                                       | Iridectomy, with corneoscleral or corneal section |
| 66605     | Iridectomy, with corneoscleral or corneal section; with cyclectomy                                                                                                                                    | Iridectomy, with corneoscleral or corneal section |
| 66600     | Iridectomy, with corneoscleral or corneal section; for removal of lesion                                                                                                                              | Iridectomy, with corneoscleral or corneal section |
| 66505     | Iridotomy by stab incision (separate procedure); with transfixion as for iris bombe                                                                                                                   | Iridotomy by stab incision                        |
| 66500     | Iridotomy by stab incision (separate procedure); except transfixion                                                                                                                                   | Iridotomy by stab incision                        |
| 65760     | Keratomileusis                                                                                                                                                                                        | Keratomileusis                                    |
| 65765     | Keratophakia                                                                                                                                                                                          | Keratophakia                                      |
| 65756     | Keratoplasty (corneal transplant); endothelial                                                                                                                                                        | Keratoplasty                                      |
| 65755     | Keratoplasty (corneal transplant); penetrating (in pseudophakia)                                                                                                                                      | Keratoplasty                                      |
| 65750     | Keratoplasty (corneal transplant); penetrating (in aphakia)                                                                                                                                           | Keratoplasty                                      |
| 65730     | Keratoplasty (corneal transplant); penetrating (except in aphakia or pseudophakia)                                                                                                                    | Keratoplasty                                      |
| 65710     | Keratoplasty (corneal transplant); anterior lamellar                                                                                                                                                  | Keratoplasty                                      |
| 65770     | Keratoprosthesis                                                                                                                                                                                      | Keratoprosthesis                                  |
| 25915     | Krukenberg procedure                                                                                                                                                                                  | Krukenberg procedure                              |
| 22819     | Kyphectomy, circumferential exposure of spine and resection of vertebral segment(s) (including body and posterior elements); 3 or more segments                                                       | Kyphectomy                                        |
| 22818     | Kyphectomy, circumferential exposure of spine and resection of vertebral segment(s) (including body and posterior elements); single or 2 segments                                                     | Kyphectomy                                        |
| 69910     | Labyrinthectomy; with mastoidectomy                                                                                                                                                                   | Labyrinthectomy                                   |
| 69905     | Labyrinthectomy; transcanal                                                                                                                                                                           | Labyrinthectomy                                   |
| 63655     | Laminectomy for implantation of neurostimulator electrodes, plate/paddle, epidural                                                                                                                    | Laminectomy/corpectomy                            |
| 63307     | Vertebral corpectomy (vertebral body resection), partial or complete, for excision of intraspinal lesion, single segment; intradural, lumbar or sacral by transperitoneal or retroperitoneal approach | Laminectomy/corpectomy                            |
| 63306     | Vertebral corpectomy (vertebral body resection), partial or complete, for excision of intraspinal lesion, single segment; intradural, thoracic by thoracolumbar approach                              | Laminectomy/corpectomy                            |
| 63305     | Vertebral corpectomy (vertebral body resection), partial or complete, for excision of intraspinal lesion, single segment; intradural, thoracic by transthoracic approach                              | Laminectomy/corpectomy                            |
| 63303     | Vertebral corpectomy (vertebral body resection), partial or complete, for excision of intraspinal lesion, single segment; extradural, lumbar or sacral by transperitoneal or retroperitoneal approach | Laminectomy/corpectomy                            |
| 63302     | Vertebral corpectomy (vertebral body resection), partial or complete, for excision of intraspinal lesion, single segment; extradural, thoracic by thoracolumbar approach                              | Laminectomy/corpectomy                            |
| 63301     | Vertebral corpectomy (vertebral body resection), partial or complete, for excision of intraspinal lesion, single segment; extradural, thoracic by transthoracic approach                              | Laminectomy/corpectomy                            |
| 63290     | Laminectomy for biopsy/excision of intraspinal neoplasm; combined extradural-intradural lesion, any level                                                                                             | Laminectomy/corpectomy                            |
| 63287     | Laminectomy for biopsy/excision of intraspinal neoplasm; intradural, intramedullary, thoracolumbar                                                                                                    | Laminectomy/corpectomy                            |
| 63286     | Laminectomy for biopsy/excision of intraspinal neoplasm; intradural, intramedullary, thoracic                                                                                                         | Laminectomy/corpectomy                            |
| 63283     | Laminectomy for biopsy/excision of intraspinal neoplasm; intradural, sacral                                                                                                                           | Laminectomy/corpectomy                            |

| Continued |                                                                                                                                                                                                                                       |                        |
|-----------|---------------------------------------------------------------------------------------------------------------------------------------------------------------------------------------------------------------------------------------|------------------------|
| Code      | Code description                                                                                                                                                                                                                      | Procedure type         |
| 63282     | Laminectomy for biopsy/excision of intraspinal neoplasm; intradural, extramedullary, lumbar                                                                                                                                           | Laminectomy/corpectomy |
| 63281     | Laminectomy for biopsy/excision of intraspinal neoplasm; intradural, extramedullary, thoracic                                                                                                                                         | Laminectomy/corpectomy |
| 63280     | Laminectomy for biopsy/excision of intraspinal neoplasm; intradural, extramedullary, cervical                                                                                                                                         | Laminectomy/corpectomy |
| 63278     | Laminectomy for biopsy/excision of intraspinal neoplasm; extradural, sacral                                                                                                                                                           | Laminectomy/corpectomy |
| 63277     | Laminectomy for biopsy/excision of intraspinal neoplasm; extradural, lumbar                                                                                                                                                           | Laminectomy/corpectomy |
| 63276     | Laminectomy for biopsy/excision of intraspinal neoplasm; extradural, thoracic                                                                                                                                                         | Laminectomy/corpectomy |
| 63273     | Laminectomy for excision of intraspinal lesion other than neoplasm, intradural; sacral                                                                                                                                                | Laminectomy/corpectomy |
| 63272     | Laminectomy for excision of intraspinal lesion other than neoplasm, intradural; lumbar                                                                                                                                                | Laminectomy/corpectomy |
| 63271     | Laminectomy for excision of intraspinal lesion other than neoplasm, intradural; thoracic                                                                                                                                              | Laminectomy/corpectomy |
| 63268     | Laminectomy for excision or evacuation of intraspinal lesion other than neoplasm, extradural; sacral                                                                                                                                  | Laminectomy/corpectomy |
| 63267     | Laminectomy for excision or evacuation of intraspinal lesion other than neoplasm, extradural; lumbar                                                                                                                                  | Laminectomy/corpectomy |
| 63266     | Laminectomy for excision or evacuation of intraspinal lesion other than neoplasm, extradural; thoracic                                                                                                                                | Laminectomy/corpectomy |
| 63252     | Laminectomy for excision or occlusion of arteriovenous malformation of spinal cord; thoracolumbar                                                                                                                                     | Laminectomy/corpectomy |
| 63251     | Laminectomy for excision or occlusion of arteriovenous malformation of spinal cord; thoracic                                                                                                                                          | Laminectomy/corpectomy |
| 63250     | Laminectomy for excision or occlusion of arteriovenous malformation of spinal cord; cervical                                                                                                                                          | Laminectomy/corpectomy |
| 63200     | Laminectomy, with release of tethered spinal cord, lumbar                                                                                                                                                                             | Laminectomy/corpectomy |
| 63199     | Laminectomy with cordotomy with section of both spinothalamic tracts, 2 stages within 14 days; thoracic                                                                                                                               | Laminectomy/corpectomy |
| 63198     | Laminectomy with cordotomy with section of both spinothalamic tracts, 2 stages within 14 days; cervical                                                                                                                               | Laminectomy/corpectomy |
| 63197     | Laminectomy with cordotomy, with section of both spinothalamic tracts, 1 stage; thoracic                                                                                                                                              | Laminectomy/corpectomy |
| 63196     | Laminectomy with cordotomy, with section of both spinothalamic tracts, 1 stage; cervical                                                                                                                                              | Laminectomy/corpectomy |
| 63195     | Laminectomy with cordotomy, with section of 1 spinothalamic tract, 1 stage; thoracic                                                                                                                                                  | Laminectomy/corpectomy |
| 63194     | Laminectomy with cordotomy, with section of 1 spinothalamic tract, 1 stage; cervical                                                                                                                                                  | Laminectomy/corpectomy |
| 63191     | Laminectomy with section of spinal accessory nerve                                                                                                                                                                                    | Laminectomy/corpectomy |
| 63190     | Laminectomy with rhizotomy; more than 2 segments                                                                                                                                                                                      | Laminectomy/corpectomy |
| 63185     | Laminectomy with rhizotomy; 1 or 2 segments                                                                                                                                                                                           | Laminectomy/corpectomy |
| 63182     | Laminectomy and section of dentate ligaments, with or without dural graft, cervical; more than 2 segments                                                                                                                             | Laminectomy/corpectomy |
| 63180     | Laminectomy and section of dentate ligaments, with or without dural graft, cervical; 1 or 2 segments                                                                                                                                  | Laminectomy/corpectomy |
| 63265     | Laminectomy for excision or evacuation of intraspinal lesion other than neoplasm, extradural; cervical                                                                                                                                | Laminectomy/corpectomy |
| 63173     | Laminectomy with drainage of intramedullary cyst/syrinx; to peritoneal or pleural space                                                                                                                                               | Laminectomy/corpectomy |
| 63172     | Laminectomy with drainage of intramedullary cyst/syrinx; to subarachnoid space                                                                                                                                                        | Laminectomy/corpectomy |
| 63270     | Laminectomy for excision of intraspinal lesion other than neoplasm, intradural; cervical                                                                                                                                              | Laminectomy/corpectomy |
| 63170     | Laminectomy with myelotomy (eg, Bischof or DREZ type), cervical, thoracic, or thoracolumbar                                                                                                                                           | Laminectomy/corpectomy |
| 63102     | Vertebral corpectomy (vertebral body resection), partial or complete, lateral extracavitary approach with decompression of spinal cord and/or nerve root(s) (eg, for tumor or retropulsed bone fragments); lumbar, single segment     | Laminectomy/corpectomy |
| 63101     | Vertebral corpectomy (vertebral body resection), partial or complete, lateral extracavitary approach with decompression of spinal cord and/or nerve root(s) (eg, for tumor or retropulsed bone fragments); thoracic, single segment   | Laminectomy/corpectomy |
| 63090     | Vertebral corpectomy (vertebral body resection), partial or complete, transperitoneal or retroperitoneal approach with decompression of spinal cord, cauda equina or nerve root(s), lower thoracic, lumbar, or sacral; single segment | Laminectomy/corpectomy |
| 63087     | Vertebral corpectomy (vertebral body resection), partial or complete, combined thoracolumbar approach with decompression of spinal cord, cauda equina or nerve root(s), lower thoracic or lumbar; single segment                      | Laminectomy/corpectomy |
| 63085     | Vertebral corpectomy (vertebral body resection), partial or complete, transthoracic approach with decompression of spinal cord and/or nerve root(s); thoracic, single segment                                                         | Laminectomy/corpectomy |
| 63275     | Laminectomy for biopsy/excision of intraspinal neoplasm; extradural, cervical                                                                                                                                                         | Laminectomy/corpectomy |

| Continued |                                                                                                                                                                                                                                                                                       |                        |
|-----------|---------------------------------------------------------------------------------------------------------------------------------------------------------------------------------------------------------------------------------------------------------------------------------------|------------------------|
| Code      | Code description                                                                                                                                                                                                                                                                      | Procedure type         |
| 63081     | Vertebral corpectomy (vertebral body resection), partial or complete, anterior approach with decompression of spinal cord and/or nerve root(s); cervical, single segment                                                                                                              | Laminectomy/corpectomy |
| 63077     | Discectomy, anterior, with decompression of spinal cord and/or nerve root(s), including osteophylectomy; thoracic, single interspace                                                                                                                                                  | Laminectomy/corpectomy |
| 63075     | Discectomy, anterior, with decompression of spinal cord and/or nerve root(s), including osteophylectomy; cervical, single interspace                                                                                                                                                  | Laminectomy/corpectomy |
| 63064     | Costovertebral approach with decompression of spinal cord or nerve root(s) (eg, herniated intervertebral disc), thoracic; single segment                                                                                                                                              | Laminectomy/corpectomy |
| 63285     | Laminectomy for biopsy/excision of intraspinal neoplasm; intradural, intramedullary, cervical                                                                                                                                                                                         | Laminectomy/corpectomy |
| 63056     | Transpedicular approach with decompression of spinal cord, equina and/or nerve root(s) (eg, herniated intervertebral disc), single segment; lumbar (including transfacet, or lateral extraforaminal approach) (eg, far lateral herniated intervertebral disc)                         | Laminectomy/corpectomy |
| 63055     | Transpedicular approach with decompression of spinal cord, equina and/or nerve root(s) (eg, herniated intervertebral disc), single segment; thoracic                                                                                                                                  | Laminectomy/corpectomy |
| 63051     | Laminoplasty, cervical, with decompression of the spinal cord, 2 or more vertebral segments; with reconstruction of the posterior bony elements (including the application of bridging bone graft and non-segmental fixation devices [eg, wire, suture, mini-plates], when performed) | Laminectomy/corpectomy |
| 63050     | Laminoplasty, cervical, with decompression of the spinal cord, 2 or more vertebral segments;                                                                                                                                                                                          | Laminectomy/corpectomy |
| 63300     | Vertebral corpectomy (vertebral body resection), partial or complete, for excision of intraspinal lesion, single segment; extradural, cervical                                                                                                                                        | Laminectomy/corpectomy |
| 63047     | Laminectomy, facetectomy and foraminotomy (unilateral or bilateral with decompression of spinal cord, cauda equina and/or nerve root[s], [eg, spinal or lateral recess stenosis]), single vertebral segment; lumbar                                                                   | Laminectomy/corpectomy |
| 63046     | Laminectomy, facetectomy and foraminotomy (unilateral or bilateral with decompression of spinal cord, cauda equina and/or nerve root[s], [eg, spinal or lateral recess stenosis]), single vertebral segment; thoracic                                                                 | Laminectomy/corpectomy |
| 63304     | Vertebral corpectomy (vertebral body resection), partial or complete, for excision of intraspinal lesion, single segment; intradural, cervical                                                                                                                                        | Laminectomy/corpectomy |
| 63045     | Laminectomy, facetectomy and foraminotomy (unilateral or bilateral with decompression of spinal cord, cauda equina and/or nerve root[s], [eg, spinal or lateral recess stenosis]), single vertebral segment; cervical                                                                 | Laminectomy/corpectomy |
| 63042     | Laminotomy (hemilaminectomy), with decompression of nerve root(s), including partial facetectomy, foraminotomy and/or excision of herniated intervertebral disc, reexploration, single interspace; lumbar                                                                             | Laminectomy/corpectomy |
| 63040     | Laminotomy (hemilaminectomy), with decompression of nerve root(s), including partial facetectomy, foraminotomy and/or excision of herniated intervertebral disc, reexploration, single interspace; cervical                                                                           | Laminectomy/corpectomy |
| 63030     | Laminotomy (hemilaminectomy), with decompression of nerve root(s), including partial facetectomy, foraminotomy and/or excision of herniated intervertebral disc; 1 interspace, lumbar                                                                                                 | Laminectomy/corpectomy |
| 63020     | Laminotomy (hemilaminectomy), with decompression of nerve root(s), including partial facetectomy, foraminotomy and/or excision of herniated intervertebral disc; 1 interspace, cervical                                                                                               | Laminectomy/corpectomy |
| 63017     | Laminectomy with exploration and/or decompression of spinal cord and/or cauda equina, without facetectomy, foraminotomy or discectomy (eg, spinal stenosis), more than 2 vertebral segments; lumbar                                                                                   | Laminectomy/corpectomy |
| 63016     | Laminectomy with exploration and/or decompression of spinal cord and/or cauda equina, without facetectomy, foraminotomy or discectomy (eg, spinal stenosis), more than 2 vertebral segments; thoracic                                                                                 | Laminectomy/corpectomy |
| 63015     | Laminectomy with exploration and/or decompression of spinal cord and/or cauda equina, without facetectomy, foraminotomy or discectomy (eg, spinal stenosis), more than 2 vertebral segments; cervical                                                                                 | Laminectomy/corpectomy |
| 63012     | Laminectomy with removal of abnormal facets and/or pars inter-articularis with decompression of cauda equina and nerve roots for spondylolisthesis, lumbar (Gill type procedure)                                                                                                      | Laminectomy/corpectomy |
| 63011     | Laminectomy with exploration and/or decompression of spinal cord and/or cauda equina, without facetectomy, foraminotomy or discectomy (eg, spinal stenosis), 1 or 2 vertebral segments; sacral                                                                                        | Laminectomy/corpectomy |

| Continued |                                                                                                                                                                                                                              |                                                                                                                   |
|-----------|------------------------------------------------------------------------------------------------------------------------------------------------------------------------------------------------------------------------------|-------------------------------------------------------------------------------------------------------------------|
| Code      | Code description                                                                                                                                                                                                             | Procedure type                                                                                                    |
| 63005     | Laminectomy with exploration and/or decompression of spinal cord and/or cauda equina, without facetectomy, foraminotomy or discectomy (eg, spinal stenosis), 1 or 2 vertebral segments; lumbar, except for spondylolisthesis | Laminectomy/corpectomy                                                                                            |
| 63003     | Laminectomy with exploration and/or decompression of spinal cord and/or cauda equina, without facetectomy, foraminotomy or discectomy (eg, spinal stenosis), 1 or 2 vertebral segments; thoracic                             | Laminectomy/corpectomy                                                                                            |
| 63001     | Laminectomy with exploration and/or decompression of spinal cord and/or cauda equina, without facetectomy, foraminotomy or discectomy (eg, spinal stenosis), 1 or 2 vertebral segments; cervical                             | Laminectomy/corpectomy                                                                                            |
| 49329     | Unlisted laparoscopy procedure, abdomen, peritoneum and omentum                                                                                                                                                              | Laparoscopic abdominal procedure                                                                                  |
| 49325     | Laparoscopy, surgical; with revision of previously placed intraperitoneal cannula or catheter, with removal of intraluminal obstructive material if performed                                                                | Laparoscopic abdominal procedure                                                                                  |
| 49324     | Laparoscopy, surgical; with insertion of tunneled intraperitoneal catheter                                                                                                                                                   | Laparoscopic abdominal procedure                                                                                  |
| 49323     | Laparoscopy, surgical; with drainage of lymphocele to peritoneal cavity                                                                                                                                                      | Laparoscopic abdominal procedure                                                                                  |
| 49322     | Laparoscopy, surgical; with aspiration of cavity or cyst (eg, ovarian cyst) (single or multiple)                                                                                                                             | Laparoscopic abdominal procedure                                                                                  |
| 44979     | Unlisted laparoscopy procedure, appendix                                                                                                                                                                                     | Laparoscopic appendix procedure                                                                                   |
| 47579     | Unlisted laparoscopy procedure, biliary tract                                                                                                                                                                                | Laparoscopic biliary procedure                                                                                    |
| 51999     | Unlisted laparoscopy procedure, bladder                                                                                                                                                                                      | Laparoscopic bladder procedure                                                                                    |
| 60659     | Unlisted laparoscopy procedure, endocrine system                                                                                                                                                                             | Laparoscopic endocrine procedure                                                                                  |
| 44227     | Laparoscopy, surgical, closure of enterostomy, large or small intestine, with resection and anastomosis                                                                                                                      | Laparoscopic enterotomy closure                                                                                   |
| 43280     | Laparoscopy, surgical, esophagogastric fundoplasty (eg, Nissen, Toupet procedures)                                                                                                                                           | Laparoscopic esophagus fundoplasty                                                                                |
| 43279     | Laparoscopy, surgical, esophagomyotomy (Heller type), with fundoplasty, when performed                                                                                                                                       | Laparoscopic esophagus fundoplasty                                                                                |
| 43289     | Unlisted laparoscopy procedure, esophagus                                                                                                                                                                                    | Laparoscopic esophagus procedure                                                                                  |
| 43284     | Laparoscopy, surgical, esophageal sphincter augmentation procedure, placement of sphincter augmentation device (ie, magnetic band), including cruroplasty when performed                                                     | Laparoscopic esophagus procedure sphincter augmentation                                                           |
| 58674     | Laparoscopy, surgical, ablation of uterine fibroid(s) including intraoperative ultrasound guidance and monitoring, radiofrequency                                                                                            | Laparoscopic fibroid ablation                                                                                     |
| 58672     | Laparoscopy, surgical; with fimbrioplasty                                                                                                                                                                                    | Laparoscopic fimbrioplasty                                                                                        |
| 58670     | Laparoscopy, surgical; with fulguration of oviducts (with or without transection)                                                                                                                                            | Laparoscopic fulguration of oviducts (with or without transection)                                                |
| 58662     | Laparoscopy, surgical; with fulguration or excision of lesions of the ovary, pelvic viscera, or peritoneal surface by any method                                                                                             | Laparoscopic fulguration or excision of lesions of the ovary, pelvic viscera, or peritoneal surface by any method |
| 43653     | Laparoscopy, surgical; gastrostomy, without construction of gastric tube (eg, Stamm procedure) (separate procedure)                                                                                                          | Laparoscopic gastrostomy, without construction of gastric tube                                                    |
| 49659     | Unlisted laparoscopy procedure, hernioplasty, herniorrhaphy, herniotomy                                                                                                                                                      | Laparoscopic hernia repair                                                                                        |
| 44238     | Unlisted laparoscopy procedure, intestine (except rectum)                                                                                                                                                                    | Laparoscopic intestinal procedure                                                                                 |
| 44187     | Laparoscopy, surgical; ileostomy or jejunostomy, non-tube                                                                                                                                                                    | Laparoscopic intestinal procedure                                                                                 |
| 44186     | Laparoscopy, surgical; jejunostomy (eg, for decompression or feeding)                                                                                                                                                        | Laparoscopic intestinal procedure                                                                                 |
| 47379     | Unlisted laparoscopic procedure, liver                                                                                                                                                                                       | Laparoscopic liver procedure                                                                                      |
| 58660     | Laparoscopy, surgical; with lysis of adhesions (salpingolysis, ovariolysis) (separate procedure)                                                                                                                             | Laparoscopic lysis of adhesions                                                                                   |
| 50548     | Laparoscopy, surgical; nephrectomy with total ureterectomy                                                                                                                                                                   | Nephrectomy - laparoscopic                                                                                        |
| 50547     | Laparoscopy, surgical; donor nephrectomy (including cold preservation), from living donor                                                                                                                                    | Nephrectomy - laparoscopic                                                                                        |
| 50546     | Laparoscopy, surgical; nephrectomy, including partial ureterectomy                                                                                                                                                           | Nephrectomy - laparoscopic                                                                                        |
| 50545     | Laparoscopy, surgical; radical nephrectomy (includes removal of Gerota's fascia and surrounding fatty tissue, removal of regional lymph nodes, and adrenalectomy)                                                            | Nephrectomy - laparoscopic                                                                                        |
| 50544     | Laparoscopy, surgical; pyeloplasty                                                                                                                                                                                           | Nephrectomy - laparoscopic                                                                                        |
| 50543     | Laparoscopy, surgical; partial nephrectomy                                                                                                                                                                                   | Nephrectomy - laparoscopic                                                                                        |
| 59898     | Unlisted laparoscopy procedure, maternity care and delivery                                                                                                                                                                  | Laparoscopic obstetric procedure                                                                                  |
| 58671     | Laparoscopy, surgical; with occlusion of oviducts by device (eg, band, clip, or Falope ring)                                                                                                                                 | Laparoscopic occlusion of oviducts by device (eg, band, clip, or Falope ring)                                     |
| 58679     | Unlisted laparoscopy procedure, oviduct, ovary                                                                                                                                                                               | Laparoscopic ovarian procedure                                                                                    |
| 45499     | Unlisted laparoscopy procedure, rectum                                                                                                                                                                                       | Laparoscopic rectal procedure                                                                                     |
| 50549     | Unlisted laparoscopy procedure, renal                                                                                                                                                                                        | Laparoscopic renal procedure                                                                                      |

| Continued |                                                                                                                                                                                                                                                                                  |                                                                                |
|-----------|----------------------------------------------------------------------------------------------------------------------------------------------------------------------------------------------------------------------------------------------------------------------------------|--------------------------------------------------------------------------------|
| Code      | Code description                                                                                                                                                                                                                                                                 | Procedure type                                                                 |
| 43282     | Laparoscopy, surgical, repair of paraesophageal hernia, includes fundoplasty, when performed; with implantation of mesh                                                                                                                                                          | Laparoscopic repair of paraesophageal hernia                                   |
| 43281     | Laparoscopy, surgical, repair of paraesophageal hernia, includes fundoplasty, when performed; without implantation of mesh                                                                                                                                                       | Laparoscopic repair of paraesophageal hernia                                   |
| 58673     | Laparoscopy, surgical; with salpingostomy (salpingoneostomy)                                                                                                                                                                                                                     | Laparoscopic salpingostomy                                                     |
| 51992     | Laparoscopy, surgical; sling operation for stress incontinence (eg, fascia or synthetic)                                                                                                                                                                                         | Laparoscopic sling operation for stress incontinence (eg, fascia or synthetic) |
| 38129     | Unlisted laparoscopy procedure, spleen                                                                                                                                                                                                                                           | Laparoscopic spleen procedure                                                  |
| 43659     | Unlisted laparoscopy procedure, stomach                                                                                                                                                                                                                                          | Laparoscopic stomach procedure                                                 |
| 55559     | Unlisted laparoscopy procedure, spermatic cord                                                                                                                                                                                                                                   | Laparoscopic testicular procedure                                              |
| 54699     | Unlisted laparoscopy procedure, testis                                                                                                                                                                                                                                           | Laparoscopic testicular procedure                                              |
| 43652     | Laparoscopy, surgical; transection of vagus nerves, selective or highly selective                                                                                                                                                                                                | Laparoscopic transection of vagus nerves                                       |
| 43651     | Laparoscopy, surgical; transection of vagus nerves, truncal                                                                                                                                                                                                                      | Laparoscopic transection of vagus nerves                                       |
| 50949     | Unlisted laparoscopy procedure, ureter                                                                                                                                                                                                                                           | Laparoscopic ureteral procedure                                                |
| 51990     | Laparoscopy, surgical; urethral suspension for stress incontinence                                                                                                                                                                                                               | Laparoscopic urethral suspension for stress incontinence                       |
| 58578     | Unlisted laparoscopy procedure, uterus                                                                                                                                                                                                                                           | Laparoscopic uterine procedure                                                 |
| 58960     | Laparotomy, for staging or restaging of ovarian, tubal, or primary peritoneal malignancy (second look), with or without omentectomy, peritoneal washing, biopsy of abdominal and pelvic peritoneum, diaphragmatic assessment with pelvic and limited para-aortic lymphadenectomy | Laparotomy                                                                     |
| 49002     | Reopening of recent laparotomy                                                                                                                                                                                                                                                   | Laparotomy                                                                     |
| 47015     | Laparotomy, with aspiration and/or injection of hepatic parasitic (eg, amoebic or echinococcal) cyst(s) or abscess(es)                                                                                                                                                           | Laparotomy                                                                     |
| 31590     | Laryngeal reinnervation by neuromuscular pedicle                                                                                                                                                                                                                                 | Laryngeal reinnervation by neuromuscular pedicle                               |
| 31390     | Pharyngolaryngectomy, with radical neck dissection; without reconstruction                                                                                                                                                                                                       | Laryngectomy, pharyngectomy, pharyngolaryngectomy                              |
| 31368     | Laryngectomy; subtotal supraglottic, with radical neck dissection                                                                                                                                                                                                                | Laryngectomy, pharyngectomy, pharyngolaryngectomy                              |
| 31365     | Laryngectomy; total, with radical neck dissection                                                                                                                                                                                                                                | Laryngectomy, pharyngectomy, pharyngolaryngectomy                              |
| 31395     | Pharyngolaryngectomy, with radical neck dissection; with reconstruction                                                                                                                                                                                                          | Laryngectomy, pharyngectomy, pharyngolaryngectomy                              |
| 31382     | Partial laryngectomy (hemilaryngectomy); antero-latero-vertical                                                                                                                                                                                                                  | Laryngectomy, pharyngectomy, pharyngolaryngectomy                              |
| 31380     | Partial laryngectomy (hemilaryngectomy); anterovertical                                                                                                                                                                                                                          | Laryngectomy, pharyngectomy, pharyngolaryngectomy                              |
| 31375     | Partial laryngectomy (hemilaryngectomy); laterovertical                                                                                                                                                                                                                          | Laryngectomy, pharyngectomy, pharyngolaryngectomy                              |
| 31370     | Partial laryngectomy (hemilaryngectomy); horizontal                                                                                                                                                                                                                              | Laryngectomy, pharyngectomy, pharyngolaryngectomy                              |
| 31367     | Laryngectomy; subtotal supraglottic, without radical neck dissection                                                                                                                                                                                                             | Laryngectomy, pharyngectomy, pharyngolaryngectomy                              |
| 31360     | Laryngectomy; total, without radical neck dissection                                                                                                                                                                                                                             | Laryngectomy, pharyngectomy, pharyngolaryngectomy                              |
| 31591     | Laryngoplasty, medialization, unilateral                                                                                                                                                                                                                                         | Laryngoplasty                                                                  |
| 31588     | Laryngoplasty, not otherwise specified (eg, for burns, reconstruction after partial laryngectomy)                                                                                                                                                                                | Laryngoplasty                                                                  |
| 31587     | Laryngoplasty, cricoid split                                                                                                                                                                                                                                                     | Laryngoplasty                                                                  |
| 31584     | Laryngoplasty; with open reduction of fracture                                                                                                                                                                                                                                   | Laryngoplasty                                                                  |
| 31582     | Laryngoplasty; for laryngeal stenosis, with graft or core mold, including tracheotomy                                                                                                                                                                                            | Laryngoplasty                                                                  |
| 31580     | Laryngoplasty; for laryngeal web, 2-stage, with keel insertion and removal                                                                                                                                                                                                       | Laryngoplasty                                                                  |
| 31554     | Laryngoplasty; for laryngeal stenosis, with graft, with indwelling stent placement, age 12 years or older                                                                                                                                                                        | Laryngoplasty                                                                  |
| 31553     | Laryngoplasty; for laryngeal stenosis, with graft, with indwelling stent placement, younger than 12 years of age                                                                                                                                                                 | Laryngoplasty                                                                  |

| Continued |                                                                                                                                                                                                                                                                                    |                                                                   |
|-----------|------------------------------------------------------------------------------------------------------------------------------------------------------------------------------------------------------------------------------------------------------------------------------------|-------------------------------------------------------------------|
| Code      | Code description                                                                                                                                                                                                                                                                   | Procedure type                                                    |
| 31552     | Laryngoplasty; for laryngeal stenosis, with graft, without indwelling stent placement, age 12 years or older                                                                                                                                                                       | Laryngoplasty                                                     |
| 31551     | Laryngoplasty; for laryngeal stenosis, with graft, without indwelling stent placement, younger than 12 years of age                                                                                                                                                                | Laryngoplasty                                                     |
| 31546     | Laryngoscopy, direct, operative, with operating microscope or telescope, with submucosal removal of non-neoplastic lesion(s) of vocal cord; reconstruction with graft(s) (includes obtaining autograft)                                                                            | Laryngoscopy, with tumor excision, with or without reconstruction |
| 31545     | Laryngoscopy, direct, operative, with operating microscope or telescope, with submucosal removal of non-neoplastic lesion(s) of vocal cord; reconstruction with local tissue flap(s)                                                                                               | Laryngoscopy, with tumor excision, with or without reconstruction |
| 31541     | Laryngoscopy, direct, operative, with excision of tumor and/or stripping of vocal cords or epiglottis; with operating microscope or telescope                                                                                                                                      | Laryngoscopy, with tumor excision, with or without reconstruction |
| 31540     | Laryngoscopy, direct, operative, with excision of tumor and/or stripping of vocal cords or epiglottis;                                                                                                                                                                             | Laryngoscopy, with tumor excision, with or without reconstruction |
| 31300     | Laryngotomy (thyrotomy, laryngofissure); with removal of tumor or laryngocele, cordectomy                                                                                                                                                                                          | Laryngotomy                                                       |
| 52649     | Laser enucleation of the prostate with morcellation, including control of postoperative bleeding, complete (vasectomy, meatotomy, cystourethroscopy, urethral calibration and/or dilation, internal urethrotomy and transurethral resection of prostate are included if performed) | Laser enucleation of the prostate with morcellation               |
| 61737     | Laser interstitial thermal therapy (LITT) of lesion, intracranial, including burr hole(s), with magnetic resonance imaging guidance, when performed; multiple trajectories for multiple or complex lesion(s)                                                                       | Laser interstitial thermal therapy (LITT) of lesion, intracranial |
| 61736     | Laser interstitial thermal therapy (LITT) of lesion, intracranial, including burr hole(s), with magnetic resonance imaging guidance, when performed; single trajectory for 1 simple lesion                                                                                         | Laser interstitial thermal therapy (LITT) of lesion, intracranial |
| 27425     | Lateral retinacular release - open                                                                                                                                                                                                                                                 | Lateral retinacular release - open                                |
| 27395     | Lengthening of hamstring tendon; multiple tendons, bilateral                                                                                                                                                                                                                       | Lengthening of hamstring tendon                                   |
| 27394     | Lengthening of hamstring tendon; multiple tendons, 1 leg                                                                                                                                                                                                                           | Lengthening of hamstring tendon                                   |
| 27393     | Lengthening of hamstring tendon; single tendon                                                                                                                                                                                                                                     | Lengthening of hamstring tendon                                   |
| 42227     | Lengthening of palate, with island flap                                                                                                                                                                                                                                            | Lengthening of palate                                             |
| 42226     | Lengthening of palate, and pharyngeal flap                                                                                                                                                                                                                                         | Lengthening of palate                                             |
| 27429     | Ligamentous reconstruction (augmentation), knee; intra-articular (open) and extra-articular                                                                                                                                                                                        | Ligamentous reconstruction (augmentation), knee                   |
| 27428     | Ligamentous reconstruction (augmentation), knee; intra-articular (open)                                                                                                                                                                                                            | Ligamentous reconstruction (augmentation), knee                   |
| 27427     | Ligamentous reconstruction (augmentation), knee; extra-articular                                                                                                                                                                                                                   | Ligamentous reconstruction (augmentation), knee                   |
| 37660     | Ligation of common iliac vein                                                                                                                                                                                                                                                      | Ligation of blood vessels                                         |
| 30920     | Ligation arteries; internal maxillary artery, transantral                                                                                                                                                                                                                          | Ligation of blood vessels                                         |
| 30915     | Ligation arteries; ethmoidal                                                                                                                                                                                                                                                       | Ligation of blood vessels                                         |
| 37650     | Ligation of femoral vein                                                                                                                                                                                                                                                           | Ligation of blood vessels                                         |
| 37619     | Ligation of inferior vena cava                                                                                                                                                                                                                                                     | Ligation of blood vessels                                         |
| 37565     | Ligation, internal jugular vein                                                                                                                                                                                                                                                    | Ligation of blood vessels                                         |
| 37617     | Ligation, major artery (eg, post-traumatic, rupture); abdomen                                                                                                                                                                                                                      | Ligation of blood vessels                                         |
| 37616     | Ligation, major artery (eg, post-traumatic, rupture); chest                                                                                                                                                                                                                        | Ligation of blood vessels                                         |
| 37618     | Ligation, major artery (eg, post-traumatic, rupture); extremity                                                                                                                                                                                                                    | Ligation of blood vessels                                         |
| 37615     | Ligation, major artery (eg, post-traumatic, rupture); neck                                                                                                                                                                                                                         | Ligation of blood vessels                                         |
| 37785     | Ligation, division, and/or excision of varicose vein cluster(s), 1 leg                                                                                                                                                                                                             | Ligation of blood vessels                                         |
| 37780     | Ligation and division of short saphenous vein at saphenopopliteal junction (separate procedure)                                                                                                                                                                                    | Ligation of blood vessels                                         |
| 37761     | Ligation of perforator vein(s), subfascial - open, including ultrasound guidance, when performed, 1 leg                                                                                                                                                                            | Ligation of blood vessels                                         |
| 37760     | Ligation of perforator veins, subfascial, radical (Linton type), including skin graft, when performed - open, 1 leg                                                                                                                                                                | Ligation of blood vessels                                         |
| 37735     | Ligation and division and complete stripping of long or short saphenous veins with radical excision of ulcer and skin graft and/or interruption of communicating veins of lower leg, with excision of deep fascia                                                                  | Ligation of blood vessels                                         |

| Continued |                                                                                                                                                                    |                                                                                           |
|-----------|--------------------------------------------------------------------------------------------------------------------------------------------------------------------|-------------------------------------------------------------------------------------------|
| Code      | Code description                                                                                                                                                   | Procedure type                                                                            |
| 37722     | Ligation, division, and stripping, long (greater) saphenous veins from saphenofemoral junction to knee or below                                                    | Ligation of blood vessels                                                                 |
| 37718     | Ligation, division, and stripping, short saphenous vein                                                                                                            | Ligation of blood vessels                                                                 |
| 37700     | Ligation and division of long saphenous vein at saphenofemoral junction, or distal interruptions                                                                   | Ligation of blood vessels                                                                 |
| 37600     | Ligation; external carotid artery                                                                                                                                  | Ligation of blood vessels                                                                 |
| 37606     | Ligation; internal or common carotid artery, with gradual occlusion, as with Selverstone or Crutchfield clamp                                                      | Ligation of blood vessels                                                                 |
| 37605     | Ligation; internal or common carotid artery                                                                                                                        | Ligation of blood vessels                                                                 |
| 37607     | Ligation or banding of angioaccess arteriovenous fistula                                                                                                           | Ligation or banding of angioaccess arteriovenous fistula                                  |
| 43405     | Ligation or stapling at gastroesophageal junction for pre-existing esophageal perforation                                                                          | Ligation or stapling at gastroesophageal junction for pre-existing esophageal perforation |
| 58605     | Ligation or transection of fallopian tube(s), abdominal or vaginal approach, postpartum, unilateral or bilateral, during same hospitalization (separate procedure) | Ligation or transection of fallopian tube(s)                                              |
| 58600     | Ligation or transection of fallopian tube(s), abdominal or vaginal approach, unilateral or bilateral                                                               | Ligation or transection of fallopian tube(s)                                              |
| 42890     | Limited pharyngectomy                                                                                                                                              | Laryngectomy, pharyngectomy, pharyngolaryngectomy                                         |
| 15876     | Suction assisted lipectomy; head and neck                                                                                                                          | Lipectomy, with or without excessive skin removal                                         |
| 15879     | Suction assisted lipectomy; lower extremity                                                                                                                        | Lipectomy, with or without excessive skin removal                                         |
| 15877     | Suction assisted lipectomy; trunk                                                                                                                                  | Lipectomy, with or without excessive skin removal                                         |
| 15878     | Suction assisted lipectomy; upper extremity                                                                                                                        | Lipectomy, with or without excessive skin removal                                         |
| 47400     | Hepaticotomy or hepaticostomy with exploration, drainage, or removal of calculus                                                                                   | Liver debridement                                                                         |
| 47011     | Hepatotomy; for percutaneous drainage of abscess or cyst, 1 or 2 stages                                                                                            | Liver debridement                                                                         |
| 47010     | Hepatotomy, for open drainage of abscess or cyst, 1 or 2 stages                                                                                                    | Liver debridement                                                                         |
| 47130     | Hepatectomy, resection of liver; total right lobectomy                                                                                                             | Liver resection                                                                           |
| 47125     | Hepatectomy, resection of liver; total left lobectomy                                                                                                              | Liver resection                                                                           |
| 47122     | Hepatectomy, resection of liver; trisegmentectomy                                                                                                                  | Liver resection                                                                           |
| 47120     | Hepatectomy, resection of liver; partial lobectomy                                                                                                                 | Liver resection                                                                           |
| 47142     | Donor hepatectomy (including cold preservation), from living donor; total right lobectomy (segments V, VI, VII and VIII)                                           | Liver transplantation                                                                     |
| 47141     | Donor hepatectomy (including cold preservation), from living donor; total left lobectomy (segments II, III and IV)                                                 | Liver transplantation                                                                     |
| 47140     | Donor hepatectomy (including cold preservation), from living donor; left lateral segment only (segments II and III)                                                | Liver transplantation                                                                     |
| 47136     | Liver allotransplantation; heterotopic, partial or whole, from cadaver or living donor, any age                                                                    | Liver transplantation                                                                     |
| 47135     | Liver allotransplantation; orthotopic, partial or whole, from cadaver or living donor, any age                                                                     | Liver transplantation                                                                     |
| 43497     | Lower esophageal myotomy, transoral (ie, peroral endoscopic myotomy [POEM])                                                                                        | Lower esophageal myotomy, endoscopic                                                      |
| 19307     | Mastectomy, modified radical, including axillary lymph nodes, with or without pectoralis minor muscle, but excluding pectoralis major muscle                       | Lumpectomy or mastectomy                                                                  |
| 19306     | Mastectomy, radical, including pectoral muscles, axillary and internal mammary lymph nodes (Urban type operation)                                                  | Lumpectomy or mastectomy                                                                  |
| 19305     | Mastectomy, radical, including pectoral muscles, axillary lymph nodes                                                                                              | Lumpectomy or mastectomy                                                                  |
| 19304     | Mastectomy, subcutaneous                                                                                                                                           | Lumpectomy or mastectomy                                                                  |
| 19303     | Mastectomy, simple, complete                                                                                                                                       | Lumpectomy or mastectomy                                                                  |
| 19302     | Mastectomy, partial (eg, lumpectomy, tylectomy, quadrantectomy, segmentectomy); with axillary lymphadenectomy                                                      | Lumpectomy or mastectomy                                                                  |
| 19301     | Mastectomy, partial (eg, lumpectomy, tylectomy, quadrantectomy, segmentectomy);                                                                                    | Lumpectomy or mastectomy                                                                  |
| 19300     | Mastectomy for gynecomastia                                                                                                                                        | Lumpectomy or mastectomy                                                                  |

| Continued |                                                                                                                                                                                                                                                                     |                                                           |
|-----------|---------------------------------------------------------------------------------------------------------------------------------------------------------------------------------------------------------------------------------------------------------------------|-----------------------------------------------------------|
| Code      | Code description                                                                                                                                                                                                                                                    | Procedure type                                            |
| 32491     | Removal of lung, other than pneumonectomy; with resection-plication of emphysematous lung(s) (bullous or non-bullous) for lung volume reduction, sternal split or transthoracic approach, includes any pleural procedure, when performed                            | Lung resection                                            |
| 32488     | Removal of lung, other than pneumonectomy; with all remaining lung following previous removal of a portion of lung (completion pneumonectomy)                                                                                                                       | Lung resection                                            |
| 32486     | Removal of lung, other than pneumonectomy; with circumferential resection of segment of bronchus followed by broncho-bronchial anastomosis (sleeve lobectomy)                                                                                                       | Lung resection                                            |
| 32484     | Removal of lung, other than pneumonectomy; single segment (segmentectomy)                                                                                                                                                                                           | Lung resection                                            |
| 32482     | Removal of lung, other than pneumonectomy; 2 lobes (bilobectomy)                                                                                                                                                                                                    | Lung resection                                            |
| 32480     | Removal of lung, other than pneumonectomy; single lobe (lobectomy)                                                                                                                                                                                                  | Lung resection                                            |
| 32445     | Removal of lung, pneumonectomy; extrapleural                                                                                                                                                                                                                        | Lung resection                                            |
| 32442     | Removal of lung, pneumonectomy; with resection of segment of trachea followed by broncho-tracheal anastomosis (sleeve pneumonectomy)                                                                                                                                | Lung resection                                            |
| 32440     | Removal of lung, pneumonectomy;                                                                                                                                                                                                                                     | Lung resection                                            |
| 32505     | Thoracotomy; with therapeutic wedge resection (eg, mass, nodule), initial                                                                                                                                                                                           | Lung resection                                            |
| 32854     | Lung transplant, double (bilateral sequential or en bloc); with cardiopulmonary bypass                                                                                                                                                                              | Lung transplant                                           |
| 32853     | Lung transplant, double (bilateral sequential or en bloc); without cardiopulmonary bypass                                                                                                                                                                           | Lung transplant                                           |
| 32852     | Lung transplant, single; with cardiopulmonary bypass                                                                                                                                                                                                                | Lung transplant                                           |
| 32851     | Lung transplant, single; without cardiopulmonary bypass                                                                                                                                                                                                             | Lung transplant                                           |
| 38572     | Laparoscopy, surgical; with bilateral total pelvic lymphadenectomy and peri-aortic lymph node sampling (biopsy), single or multiple                                                                                                                                 | Lymphadenectomy                                           |
| 38571     | Laparoscopy, surgical; with bilateral total pelvic lymphadenectomy                                                                                                                                                                                                  | Lymphadenectomy                                           |
| 38573     | Laparoscopy, surgical; with bilateral total pelvic lymphadenectomy and peri-aortic lymph node sampling, peritoneal washings, peritoneal biopsy(ies), omentectomy, and diaphragmatic washings, including diaphragmatic and other serosal biopsy(ies), when performed | Lymphadenectomy                                           |
| 38770     | Pelvic lymphadenectomy, including external iliac, hypogastric, and obturator nodes (separate procedure)                                                                                                                                                             | Lymphadenectomy                                           |
| 38562     | Limited lymphadenectomy for staging (separate procedure); pelvic and para-aortic                                                                                                                                                                                    | Lymphadenectomy                                           |
| 38780     | Retroperitoneal transabdominal lymphadenectomy, extensive, including pelvic, aortic, and renal nodes (separate procedure)                                                                                                                                           | Lymphadenectomy                                           |
| 38564     | Limited lymphadenectomy for staging (separate procedure); retroperitoneal (aortic and/or splenic)                                                                                                                                                                   | Lymphadenectomy                                           |
| 38745     | Axillary lymphadenectomy; complete                                                                                                                                                                                                                                  | Lymphadenectomy                                           |
| 38740     | Axillary lymphadenectomy; superficial                                                                                                                                                                                                                               | Lymphadenectomy                                           |
| 38724     | Cervical lymphadenectomy (modified radical neck dissection)                                                                                                                                                                                                         | Lymphadenectomy                                           |
| 38720     | Cervical lymphadenectomy (complete)                                                                                                                                                                                                                                 | Lymphadenectomy                                           |
| 38700     | Suprahyoid lymphadenectomy                                                                                                                                                                                                                                          | Lymphadenectomy                                           |
| 38542     | Dissection, deep jugular node(s)                                                                                                                                                                                                                                    | Lymphadenectomy                                           |
| 38765     | Inguinofemoral lymphadenectomy, superficial, in continuity with pelvic lymphadenectomy, including external iliac, hypogastric, and obturator nodes (separate procedure)                                                                                             | Lymphadenectomy                                           |
| 38760     | Inguinofemoral lymphadenectomy, superficial, including Cloquets node (separate procedure)                                                                                                                                                                           | Lymphadenectomy                                           |
| 38308     | Lymphangiectomy or other operations on lymphatic channels                                                                                                                                                                                                           | Lymphangiectomy or other operations on lymphatic channels |
| 58740     | Lysis of adhesions (salpingolysis, ovariolysis)                                                                                                                                                                                                                     | Lysis of adhesions (salpingolysis, ovariolysis)           |
| 32820     | Major reconstruction, chest wall (posttraumatic)                                                                                                                                                                                                                    | Major reconstruction, chest wall                          |
| 21270     | Malar augmentation, prosthetic material                                                                                                                                                                                                                             | Malar augmentation                                        |
| 19325     | Mammoplasty, augmentation; with prosthetic implant                                                                                                                                                                                                                  | Mammoplasty, augmentation                                 |
| 19324     | Mammoplasty, augmentation; without prosthetic implant                                                                                                                                                                                                               | Mammoplasty, augmentation                                 |
| 19318     | Reduction mammoplasty                                                                                                                                                                                                                                               | Mammoplasty, augmentation                                 |
| 47362     | Management of liver hemorrhage; re-exploration of hepatic wound for removal of packing                                                                                                                                                                              | Management of liver hemorrhage                            |
| 47361     | Management of liver hemorrhage; exploration of hepatic wound, extensive debridement, coagulation and/or suture, with or without packing of liver                                                                                                                    | Management of liver hemorrhage                            |
| 47360     | Management of liver hemorrhage; complex suture of liver wound or injury, with or without hepatic artery ligation                                                                                                                                                    | Management of liver hemorrhage                            |

| Continued |                                                                                                                                                                                                                                                                                                                                                                                                                                                                                              |                                                                         |
|-----------|----------------------------------------------------------------------------------------------------------------------------------------------------------------------------------------------------------------------------------------------------------------------------------------------------------------------------------------------------------------------------------------------------------------------------------------------------------------------------------------------|-------------------------------------------------------------------------|
| Code      | Code description                                                                                                                                                                                                                                                                                                                                                                                                                                                                             | Procedure type                                                          |
| 47350     | Management of liver hemorrhage; simple suture of liver wound or injury                                                                                                                                                                                                                                                                                                                                                                                                                       | Management of liver hemorrhage                                          |
| 47300     | Marsupialization of cyst or abscess of liver                                                                                                                                                                                                                                                                                                                                                                                                                                                 | Marsupialization of cyst or abscess of liver                            |
| 53240     | Marsupialization of urethral diverticulum, male or female                                                                                                                                                                                                                                                                                                                                                                                                                                    | Marsupialization of urethral diverticulum, male or female               |
| 69670     | Mastoid obliteration (separate procedure)                                                                                                                                                                                                                                                                                                                                                                                                                                                    | Mastoid obliteration                                                    |
| 69511     | Mastoidectomy; radical                                                                                                                                                                                                                                                                                                                                                                                                                                                                       | Mastoidectomy                                                           |
| 69505     | Mastoidectomy; modified radical                                                                                                                                                                                                                                                                                                                                                                                                                                                              | Mastoidectomy                                                           |
| 69502     | Mastoidectomy; complete                                                                                                                                                                                                                                                                                                                                                                                                                                                                      | Mastoidectomy                                                           |
| 69501     | Transmastoid antrotomy (simple mastoidectomy)                                                                                                                                                                                                                                                                                                                                                                                                                                                | Mastoidectomy                                                           |
| 69605     | Revision mastoidectomy; with apicectomy                                                                                                                                                                                                                                                                                                                                                                                                                                                      | Mastoidectomy                                                           |
| 69604     | Revision mastoidectomy; resulting in tympanoplasty                                                                                                                                                                                                                                                                                                                                                                                                                                           | Mastoidectomy                                                           |
| 69603     | Revision mastoidectomy; resulting in radical mastoidectomy                                                                                                                                                                                                                                                                                                                                                                                                                                   | Mastoidectomy                                                           |
| 69602     | Revision mastoidectomy; resulting in modified radical mastoidectomy                                                                                                                                                                                                                                                                                                                                                                                                                          | Mastoidectomy                                                           |
| 69601     | Revision mastoidectomy; resulting in complete mastoidectomy                                                                                                                                                                                                                                                                                                                                                                                                                                  | Mastoidectomy                                                           |
| 69530     | Petrous apicectomy including radical mastoidectomy                                                                                                                                                                                                                                                                                                                                                                                                                                           | Mastoidectomy                                                           |
| 19316     | Mastopexy                                                                                                                                                                                                                                                                                                                                                                                                                                                                                    | Mastopexy                                                               |
| 31230     | Maxillectomy; with orbital exenteration (en bloc)                                                                                                                                                                                                                                                                                                                                                                                                                                            | Maxillectomy                                                            |
| 31225     | Maxillectomy; without orbital exenteration                                                                                                                                                                                                                                                                                                                                                                                                                                                   | Maxillectomy                                                            |
| 39000     | Mediastinotomy with exploration, drainage, removal of foreign body, or biopsy; cervical approach                                                                                                                                                                                                                                                                                                                                                                                             | Medianstintomy                                                          |
| 39010     | Mediastinotomy with exploration, drainage, removal of foreign body, or biopsy; transthoracic approach, including either transthoracic or median sternotomy                                                                                                                                                                                                                                                                                                                                   | Medianstintomy                                                          |
| 21060     | Meniscectomy, partial or complete, temporomandibular joint (separate procedure)                                                                                                                                                                                                                                                                                                                                                                                                              | Meniscectomy of temporomandibular joint                                 |
| 65125     | Modification of ocular implant with placement or replacement of pegs (eg, drilling receptacle for prosthesis appendage) (separate procedure)                                                                                                                                                                                                                                                                                                                                                 | Modification of ocular implant with placement or replacement of pegs    |
| 17313     | Mohs micrographic technique, including removal of all gross tumor, surgical excision of tissue specimens, mapping, color coding of specimens, microscopic examination of specimens by the surgeon, and histopathologic preparation including routine stain(s) (eg, hematoxylin and eosin, toluidine blue), of the trunk, arms, or legs; first stage, up to 5 tissue blocks                                                                                                                   | Mohs micrographic technique                                             |
| 17311     | Mohs micrographic technique, including removal of all gross tumor, surgical excision of tissue specimens, mapping, color coding of specimens, microscopic examination of specimens by the surgeon, and histopathologic preparation including routine stain(s) (eg, hematoxylin and eosin, toluidine blue), head, neck, hands, feet, genitalia, or any location with surgery directly involving muscle, cartilage, bone, tendon, major nerves, or vessels; first stage, up to 5 tissue blocks | Mohs micrographic technique                                             |
| 65600     | Multiple punctures of anterior cornea (eg, for corneal erosion, tattoo)                                                                                                                                                                                                                                                                                                                                                                                                                      | Multiple punctures of anterior cornea (eg, for corneal erosion, tattoo) |
| 26591     | Repair, intrinsic muscles of hand, each muscle                                                                                                                                                                                                                                                                                                                                                                                                                                               | Muscle repair, hand                                                     |
| 23397     | Muscle transfer, any type, shoulder or upper arm; multiple                                                                                                                                                                                                                                                                                                                                                                                                                                   | Muscle transfer, upper extremity                                        |
| 23395     | Muscle transfer, any type, shoulder or upper arm; single                                                                                                                                                                                                                                                                                                                                                                                                                                     | Muscle transfer, upper extremity                                        |
| 33542     | Myocardial resection (eg, ventricular aneurysmectomy)                                                                                                                                                                                                                                                                                                                                                                                                                                        | Myocardial resection                                                    |
| 58146     | Myomectomy, excision of fibroid tumor(s) of uterus, 5 or more intramural myomas and/or intramural myomas with total weight greater than 250 g, abdominal approach                                                                                                                                                                                                                                                                                                                            | Myomectomy, fibroid                                                     |
| 58140     | Myomectomy, excision of fibroid tumor(s) of uterus, 1 to 4 intramural myoma(s) with total weight of 250 g or less and/or removal of surface myomas; abdominal approach                                                                                                                                                                                                                                                                                                                       | Myomectomy, fibroid                                                     |
| 58145     | Myomectomy, excision of fibroid tumor(s) of uterus, 1 to 4 intramural myoma(s) with total weight of 250 g or less and/or removal of surface myomas; vaginal approach                                                                                                                                                                                                                                                                                                                         | Myomectomy, fibroid                                                     |
| 45108     | Anorectal myomectomy                                                                                                                                                                                                                                                                                                                                                                                                                                                                         | Myomectomy, anorectal                                                   |
| 20912     | Cartilage graft; nasal septum                                                                                                                                                                                                                                                                                                                                                                                                                                                                | Nasal septum reconstruction                                             |
| 31294     | Nasal/sinus endoscopy, surgical; with optic nerve decompression                                                                                                                                                                                                                                                                                                                                                                                                                              | Nasal/sinus endoscopy                                                   |
| 31293     | Nasal/sinus endoscopy, surgical; with medial orbital wall and inferior orbital wall decompression                                                                                                                                                                                                                                                                                                                                                                                            | Nasal/sinus endoscopy                                                   |
| 31292     | Nasal/sinus endoscopy, surgical; with medial or inferior orbital wall decompression                                                                                                                                                                                                                                                                                                                                                                                                          | Nasal/sinus endoscopy                                                   |
| 31291     | Nasal/sinus endoscopy, surgical, with repair of cerebrospinal fluid leak; sphenoid region                                                                                                                                                                                                                                                                                                                                                                                                    | Nasal/sinus endoscopy                                                   |
| 31290     | Nasal/sinus endoscopy, surgical, with repair of cerebrospinal fluid leak; ethmoid region                                                                                                                                                                                                                                                                                                                                                                                                     | Nasal/sinus endoscopy                                                   |
| 50236     | Nephrectomy with total ureterectomy and bladder cuff; through separate incision                                                                                                                                                                                                                                                                                                                                                                                                              | Nephrectomy - open                                                      |

| Continued |                                                                                                                                                               |                               |
|-----------|---------------------------------------------------------------------------------------------------------------------------------------------------------------|-------------------------------|
| Code      | Code description                                                                                                                                              | Procedure type                |
| 50234     | Nephrectomy with total ureterectomy and bladder cuff; through same incision                                                                                   | Nephrectomy - open            |
| 50230     | Nephrectomy, including partial ureterectomy, any open approach including rib resection; radical, with regional lymphadenectomy and/or vena caval thrombectomy | Nephrectomy - open            |
| 50225     | Nephrectomy, including partial ureterectomy, any open approach including rib resection; complicated because of previous surgery on same kidney                | Nephrectomy - open            |
| 50220     | Nephrectomy, including partial ureterectomy, any open approach including rib resection;                                                                       | Nephrectomy - open            |
| 50240     | Nephrectomy, partial                                                                                                                                          | Nephrectomy - open            |
| 50500     | Nephrorrhaphy, suture of kidney wound or injury                                                                                                               | Nephrolithotomy               |
| 50075     | Nephrolithotomy; removal of large staghorn calculus filling renal pelvis and calyces (including anatomic pyelolithotomy)                                      | Nephrolithotomy               |
| 50070     | Nephrolithotomy; complicated by congenital kidney abnormality                                                                                                 | Nephrolithotomy               |
| 50065     | Nephrolithotomy; secondary surgical operation for calculus                                                                                                    | Nephrolithotomy               |
| 50060     | Nephrolithotomy; removal of calculus                                                                                                                          | Nephrolithotomy               |
| 50040     | Nephrostomy, nephrotomy with drainage                                                                                                                         | Nephrostomy and/or nephrotomy |
| 50045     | Nephrotomy, with exploration                                                                                                                                  | Nephrostomy and/or nephrotomy |
| 64861     | Suture of; brachial plexus                                                                                                                                    | Nerve repair                  |
| 64857     | Suture of major peripheral nerve, arm or leg, except sciatic; without transposition                                                                           | Nerve repair                  |
| 64856     | Suture of major peripheral nerve, arm or leg, except sciatic; including transposition                                                                         | Nerve repair                  |
| 64840     | Suture of posterior tibial nerve                                                                                                                              | Nerve repair                  |
| 64865     | Suture of facial nerve; infratemporal, with or without grafting                                                                                               | Nerve repair                  |
| 64864     | Suture of facial nerve; extracranial                                                                                                                          | Nerve repair                  |
| 64912     | Nerve repair; with nerve allograft, each nerve, first strand (cable)                                                                                          | Nerve repair                  |
| 64911     | Nerve repair; with autogenous vein graft (includes harvest of vein graft), each nerve                                                                         | Nerve repair                  |
| 64907     | Nerve pedicle transfer; second stage                                                                                                                          | Nerve repair                  |
| 64905     | Nerve pedicle transfer; first stage                                                                                                                           | Nerve repair                  |
| 64898     | Nerve graft (includes obtaining graft), multiple strands (cable), arm or leg; more than 4 cm length                                                           | Nerve repair                  |
| 64897     | Nerve graft (includes obtaining graft), multiple strands (cable), arm or leg; up to 4 cm length                                                               | Nerve repair                  |
| 64896     | Nerve graft (includes obtaining graft), multiple strands (cable), hand or foot; more than 4 cm length                                                         | Nerve repair                  |
| 64895     | Nerve graft (includes obtaining graft), multiple strands (cable), hand or foot; up to 4 cm length                                                             | Nerve repair                  |
| 64893     | Nerve graft (includes obtaining graft), single strand, arm or leg; more than 4 cm length                                                                      | Nerve repair                  |
| 64892     | Nerve graft (includes obtaining graft), single strand, arm or leg; up to 4 cm length                                                                          | Nerve repair                  |
| 64891     | Nerve graft (includes obtaining graft), single strand, hand or foot; more than 4 cm length                                                                    | Nerve repair                  |
| 64890     | Nerve graft (includes obtaining graft), single strand, hand or foot; up to 4 cm length                                                                        | Nerve repair                  |
| 64886     | Nerve graft (includes obtaining graft), head or neck; more than 4 cm length                                                                                   | Nerve repair                  |
| 64910     | Nerve repair; with synthetic conduit or vein allograft (eg, nerve tube), each nerve                                                                           | Nerve repair                  |
| 64885     | Nerve graft (includes obtaining graft), head or neck; up to 4 cm in length                                                                                    | Nerve repair                  |
| 64716     | Neuroplasty and/or transposition; cranial nerve (specify)                                                                                                     | Nerve repair                  |
| 64714     | Neuroplasty, major peripheral nerve, arm or leg - open; lumbar plexus                                                                                         | Nerve repair                  |
| 64713     | Neuroplasty, major peripheral nerve, arm or leg - open; brachial plexus                                                                                       | Nerve repair                  |
| 64712     | Neuroplasty, major peripheral nerve, arm or leg - open; sciatic nerve                                                                                         | Nerve repair                  |
| 64708     | Neuroplasty, major peripheral nerve, arm or leg - open; other than specified                                                                                  | Nerve repair                  |
| 64704     | Neuroplasty; nerve of hand or foot                                                                                                                            | Nerve repair                  |
| 64702     | Neuroplasty; digital, 1 or both, same digit                                                                                                                   | Nerve repair                  |
| 64836     | Suture of 1 nerve; ulnar motor                                                                                                                                | Nerve repair                  |
| 64835     | Suture of 1 nerve; median motor thenar                                                                                                                        | Nerve repair                  |
| 64834     | Suture of 1 nerve; hand or foot, common sensory nerve                                                                                                         | Nerve repair                  |
| 64831     | Suture of digital nerve, hand or foot; 1 nerve                                                                                                                | Nerve repair                  |
| 64862     | Suture of; lumbar plexus                                                                                                                                      | Nerve repair                  |
| 64858     | Suture of sciatic nerve                                                                                                                                       | Nerve repair                  |
| 64772     | Transection or avulsion of other spinal nerve, extradural                                                                                                     | Nerve transection             |
| 64771     | Transection or avulsion of other cranial nerve, extradural                                                                                                    | Nerve transection             |

| Continued |                                                                                                                                                                                                |                                                                                                                                 |
|-----------|------------------------------------------------------------------------------------------------------------------------------------------------------------------------------------------------|---------------------------------------------------------------------------------------------------------------------------------|
| Code      | Code description                                                                                                                                                                               | Procedure type                                                                                                                  |
| 64744     | Transection or avulsion of; greater occipital nerve                                                                                                                                            | Nerve transection                                                                                                               |
| 64742     | Transection or avulsion of; facial nerve, differential or complete                                                                                                                             | Nerve transection                                                                                                               |
| 64740     | Transection or avulsion of; lingual nerve                                                                                                                                                      | Nerve transection                                                                                                               |
| 64738     | Transection or avulsion of; inferior alveolar nerve by osteotomy                                                                                                                               | Nerve transection                                                                                                               |
| 64736     | Transection or avulsion of; mental nerve                                                                                                                                                       | Nerve transection                                                                                                               |
| 64734     | Transection or avulsion of; infraorbital nerve                                                                                                                                                 | Nerve transection                                                                                                               |
| 64732     | Transection or avulsion of; supraorbital nerve                                                                                                                                                 | Nerve transection                                                                                                               |
| 64766     | Transection or avulsion of obturator nerve, intrapelvic, with or without adductor tenotomy                                                                                                     | Nerve transection                                                                                                               |
| 64763     | Transection or avulsion of obturator nerve, extrapelvic, with or without adductor tenotomy                                                                                                     | Nerve transection                                                                                                               |
| 64746     | Transection or avulsion of; phrenic nerve                                                                                                                                                      | Nerve transection                                                                                                               |
| 64761     | Transection or avulsion of; pudendal nerve                                                                                                                                                     | Nerve transection                                                                                                               |
| 64760     | Transection or avulsion of; vagus nerve (vagusotomy), abdominal                                                                                                                                | Nerve transection                                                                                                               |
| 64755     | Transection or avulsion of; vagus nerves limited to proximal stomach (selective proximal vagotomy, proximal gastric vagotomy, parietal cell vagotomy, supra- or highly selective vagotomy)     | Nerve transection                                                                                                               |
| 64752     | Transection or avulsion of; vagus nerve (vagusotomy), transthoracic                                                                                                                            | Nerve transection                                                                                                               |
| 28055     | Neurectomy, intrinsic musculature of foot                                                                                                                                                      | Neurectomy                                                                                                                      |
| 27326     | Neurectomy, popliteal (gastrocnemius)                                                                                                                                                          | Neurectomy                                                                                                                      |
| 27325     | Neurectomy, hamstring muscle                                                                                                                                                                   | Neurectomy                                                                                                                      |
| 62165     | Neuroendoscopy, intracranial; with excision of pituitary tumor, transnasal or trans-sphenoidal approach                                                                                        | Neuroendoscopy, intracranial                                                                                                    |
| 62164     | Neuroendoscopy, intracranial; with excision of brain tumor, including placement of external ventricular catheter for drainage                                                                  | Neuroendoscopy, intracranial                                                                                                    |
| 62163     | Neuroendoscopy, intracranial; with retrieval of foreign body                                                                                                                                   | Neuroendoscopy, intracranial                                                                                                    |
| 62162     | Neuroendoscopy, intracranial; with fenestration or excision of colloid cyst, including placement of external ventricular catheter for drainage                                                 | Neuroendoscopy, intracranial                                                                                                    |
| 62161     | Neuroendoscopy, intracranial; with dissection of adhesions, fenestration of septum pellucidum or intraventricular cysts (including placement, replacement, or removal of ventricular catheter) | Neuroendoscopy, intracranial                                                                                                    |
| 69955     | Total facial nerve decompression and/or repair (may include graft)                                                                                                                             | Nerve decompression                                                                                                             |
| 69725     | Decompression facial nerve, intratemporal; including medial to geniculate ganglion                                                                                                             | Nerve decompression                                                                                                             |
| 69720     | Decompression facial nerve, intratemporal; lateral to geniculate ganglion                                                                                                                      | Nerve decompression                                                                                                             |
| 64721     | Neuroplasty and/or transposition; median nerve at carpal tunnel                                                                                                                                | Nerve decompression                                                                                                             |
| 64726     | Decompression; plantar digital nerve                                                                                                                                                           | Nerve decompression                                                                                                             |
| 64719     | Neuroplasty and/or transposition; ulnar nerve at wrist                                                                                                                                         | Nerve decompression                                                                                                             |
| 64718     | Neuroplasty and/or transposition; ulnar nerve at elbow                                                                                                                                         | Nerve decompression                                                                                                             |
| 64722     | Decompression; unspecified nerve(s) (specify)                                                                                                                                                  | Nerve decompression                                                                                                             |
| 19110     | Nipple exploration, with or without excision of a solitary lactiferous duct or a papilloma lactiferous duct                                                                                    | Nipple exploration or reconstruction                                                                                            |
| 19355     | Correction of inverted nipples                                                                                                                                                                 | Nipple exploration or reconstruction                                                                                            |
| 19350     | Nipple/areola reconstruction                                                                                                                                                                   | Nipple exploration or reconstruction                                                                                            |
| 46707     | Repair of anorectal fistula with plug (eg, porcine small intestine submucosa [SIS])                                                                                                            | Non-surgical repair of anal or anorectal fistula                                                                                |
| 46706     | Repair of anal fistula with fibrin glue                                                                                                                                                        | Non-surgical repair of anal or anorectal fistula                                                                                |
| 33814     | Obliteration of aortopulmonary septal defect; with cardiopulmonary bypass                                                                                                                      | Obliteration of aortopulmonary septal defect                                                                                    |
| 33813     | Obliteration of aortopulmonary septal defect; without cardiopulmonary bypass                                                                                                                   | Obliteration of aortopulmonary septal defect                                                                                    |
| 61613     | Obliteration of carotid aneurysm, arteriovenous malformation, or carotid-cavernous fistula by dissection within cavernous sinus                                                                | Obliteration of carotid aneurysm, arteriovenous malformation, or carotid-cavernous fistula by dissection within cavernous sinus |
| 58615     | Occlusion of fallopian tube(s) by device (eg, band, clip, Falope ring) vaginal or suprapubic approach                                                                                          | Occlusion of fallopian tube(s) by device                                                                                        |

| Continued |                                                                                                                                                                                                                                                                                                   |                                                 |
|-----------|---------------------------------------------------------------------------------------------------------------------------------------------------------------------------------------------------------------------------------------------------------------------------------------------------|-------------------------------------------------|
| Code      | Code description                                                                                                                                                                                                                                                                                  | Procedure type                                  |
| 65782     | Ocular surface reconstruction; limbal conjunctival autograft (includes obtaining graft)                                                                                                                                                                                                           | Ocular surface reconstruction                   |
| 65781     | Ocular surface reconstruction; limbal stem cell allograft (eg, cadaveric or living donor)                                                                                                                                                                                                         | Ocular surface reconstruction                   |
| 65780     | Ocular surface reconstruction; amniotic membrane transplantation, multiple layers                                                                                                                                                                                                                 | Ocular surface reconstruction                   |
| 49255     | Omentectomy, epiploectomy, resection of omentum (separate procedure)                                                                                                                                                                                                                              | Omentectomy, epiploectomy, resection of omentum |
| 58940     | Oophorectomy, partial or total, unilateral or bilateral;                                                                                                                                                                                                                                          | Oophorectomy                                    |
| 58920     | Wedge resection or bisection of ovary, unilateral or bilateral                                                                                                                                                                                                                                    | Oophorectomy                                    |
| 58943     | Oophorectomy, partial or total, unilateral or bilateral; for ovarian, tubal or primary peritoneal malignancy, with para-aortic and pelvic lymph node biopsies, peritoneal washings, peritoneal biopsies, diaphragmatic assessments, with or without salpingectomy(s), with or without omentectomy | Oophorectomy                                    |
| 23532     | Open treatment of sternoclavicular dislocation, acute or chronic; with fascial graft (includes obtaining graft)                                                                                                                                                                                   | Open treatment of clavicle fracture             |
| 23530     | Open treatment of sternoclavicular dislocation, acute or chronic;                                                                                                                                                                                                                                 | Open treatment of clavicle fracture             |
| 23515     | Open treatment of clavicular fracture, includes internal fixation, when performed                                                                                                                                                                                                                 | Open treatment of clavicle fracture             |
| 21490     | Open treatment of temporomandibular dislocation                                                                                                                                                                                                                                                   | Open treatment of facial fractures              |
| 21470     | Open treatment of complicated mandibular fracture by multiple surgical approaches including internal fixation, interdental fixation, and/or wiring of dentures or splints                                                                                                                         | Open treatment of facial fractures              |
| 21465     | Open treatment of mandibular condylar fracture                                                                                                                                                                                                                                                    | Open treatment of facial fractures              |
| 21462     | Open treatment of mandibular fracture; with interdental fixation                                                                                                                                                                                                                                  | Open treatment of facial fractures              |
| 21461     | Open treatment of mandibular fracture; without interdental fixation                                                                                                                                                                                                                               | Open treatment of facial fractures              |
| 21454     | Open treatment of mandibular fracture with external fixation                                                                                                                                                                                                                                      | Open treatment of facial fractures              |
| 21445     | Open treatment of mandibular or maxillary alveolar ridge fracture (separate procedure)                                                                                                                                                                                                            | Open treatment of facial fractures              |
| 21435     | Open treatment of craniofacial separation (LeFort III type); complicated, utilizing internal and/or external fixation techniques (eg, head cap, halo device, and/or intermaxillary fixation)                                                                                                      | Open treatment of facial fractures              |
| 21433     | Open treatment of craniofacial separation (LeFort III type); complicated (eg, comminuted or involving cranial nerve foramina), multiple surgical approaches                                                                                                                                       | Open treatment of facial fractures              |
| 21432     | Open treatment of craniofacial separation (LeFort III type); with wiring and/or internal fixation                                                                                                                                                                                                 | Open treatment of facial fractures              |
| 21422     | Open treatment of palatal or maxillary fracture (LeFort I type);                                                                                                                                                                                                                                  | Open treatment of facial fractures              |
| 21408     | Open treatment of fracture of orbit, except blowout; with bone grafting (includes obtaining graft)                                                                                                                                                                                                | Open treatment of facial fractures              |
| 21407     | Open treatment of fracture of orbit, except blowout; with implant                                                                                                                                                                                                                                 | Open treatment of facial fractures              |
| 21423     | Open treatment of palatal or maxillary fracture (LeFort I type); complicated (comminuted or involving cranial nerve foramina), multiple approaches                                                                                                                                                | Open treatment of facial fractures              |
| 21406     | Open treatment of fracture of orbit, except blowout; without implant                                                                                                                                                                                                                              | Open treatment of facial fractures              |
| 21395     | Open treatment of orbital floor blowout fracture; periorbital approach with bone graft (includes obtaining graft)                                                                                                                                                                                 | Open treatment of facial fractures              |
| 21390     | Open treatment of orbital floor blowout fracture; periorbital approach, with alloplastic or other implant                                                                                                                                                                                         | Open treatment of facial fractures              |
| 21387     | Open treatment of orbital floor blowout fracture; combined approach                                                                                                                                                                                                                               | Open treatment of facial fractures              |
| 21386     | Open treatment of orbital floor blowout fracture; periorbital approach                                                                                                                                                                                                                            | Open treatment of facial fractures              |
| 21385     | Open treatment of orbital floor blowout fracture; transantral approach (Caldwell-Luc type operation)                                                                                                                                                                                              | Open treatment of facial fractures              |
| 21366     | Open treatment of complicated (eg, comminuted or involving cranial nerve foramina) fracture(s) of malar area, including zygomatic arch and malar tripod; with bone grafting (includes obtaining graft)                                                                                            | Open treatment of facial fractures              |
| 21365     | Open treatment of complicated (eg, comminuted or involving cranial nerve foramina) fracture(s) of malar area, including zygomatic arch and malar tripod; with internal fixation and multiple surgical approaches                                                                                  | Open treatment of facial fractures              |
| 21436     | Open treatment of craniofacial separation (LeFort III type); complicated, multiple surgical approaches, internal fixation, with bone grafting (includes obtaining graft)                                                                                                                          | Open treatment of facial fractures              |
| 21360     | Open treatment of depressed malar fracture, including zygomatic arch and malar tripod                                                                                                                                                                                                             | Open treatment of facial fractures              |
| 21356     | Open treatment of depressed zygomatic arch fracture (eg, Gillies approach)                                                                                                                                                                                                                        | Open treatment of facial fractures              |
| 21348     | Open treatment of nasomaxillary complex fracture (LeFort II type); with bone grafting (includes obtaining graft)                                                                                                                                                                                  | Open treatment of facial fractures              |

| Continued |                                                                                                                                                                                                                                                                                  |                                             |
|-----------|----------------------------------------------------------------------------------------------------------------------------------------------------------------------------------------------------------------------------------------------------------------------------------|---------------------------------------------|
| Code      | Code description                                                                                                                                                                                                                                                                 | Procedure type                              |
| 21347     | Open treatment of nasomaxillary complex fracture (LeFort II type); requiring multiple open approaches                                                                                                                                                                            | Open treatment of facial fractures          |
| 21495     | Open treatment of hyoid fracture                                                                                                                                                                                                                                                 | Open treatment of facial fractures          |
| 21346     | Open treatment of nasomaxillary complex fracture (LeFort II type); with wiring and/or local fixation                                                                                                                                                                             | Open treatment of facial fractures          |
| 21344     | Open treatment of complicated (eg, comminuted or involving posterior wall) frontal sinus fracture, via coronal or multiple approaches                                                                                                                                            | Open treatment of facial fractures          |
| 21343     | Open treatment of depressed frontal sinus fracture                                                                                                                                                                                                                               | Open treatment of facial fractures          |
| 21339     | Open treatment of nasoethmoid fracture; with external fixation                                                                                                                                                                                                                   | Open treatment of facial fractures          |
| 21338     | Open treatment of nasoethmoid fracture; without external fixation                                                                                                                                                                                                                | Open treatment of facial fractures          |
| 21336     | Open treatment of nasal septal fracture, with or without stabilization                                                                                                                                                                                                           | Open treatment of facial fractures          |
| 21335     | Open treatment of nasal fracture; with concomitant open treatment of fractured septum                                                                                                                                                                                            | Open treatment of facial fractures          |
| 21330     | Open treatment of nasal fracture; complicated, with internal and/or external skeletal fixation                                                                                                                                                                                   | Open treatment of facial fractures          |
| 21325     | Open treatment of nasal fracture; uncomplicated                                                                                                                                                                                                                                  | Open treatment of facial fractures          |
| 27513     | Open treatment of femoral supracondylar or transcondylar fracture with intercondylar extension, includes internal fixation, when performed                                                                                                                                       | Open treatment of fracture, hip or pelvis   |
| 27511     | Open treatment of femoral supracondylar or transcondylar fracture without intercondylar extension, includes internal fixation, when performed                                                                                                                                    | Open treatment of fracture, hip or pelvis   |
| 27507     | Open treatment of femoral shaft fracture with plate/screws, with or without cerclage                                                                                                                                                                                             | Open treatment of fracture, hip or pelvis   |
| 27506     | Open treatment of femoral shaft fracture, with or without external fixation, with insertion of intramedullary implant, with or without cerclage and/or locking screws                                                                                                            | Open treatment of fracture, hip or pelvis   |
| 27269     | Open treatment of femoral fracture, proximal end, head, includes internal fixation, when performed                                                                                                                                                                               | Open treatment of fracture, hip or pelvis   |
| 27259     | Open treatment of spontaneous hip dislocation (developmental, including congenital or pathological), replacement of femoral head in acetabulum (including tenotomy, etc); with femoral shaft shortening                                                                          | Open treatment of fracture, hip or pelvis   |
| 27258     | Open treatment of spontaneous hip dislocation (developmental, including congenital or pathological), replacement of femoral head in acetabulum (including tenotomy, etc);                                                                                                        | Open treatment of fracture, hip or pelvis   |
| 27254     | Open treatment of hip dislocation, traumatic, with acetabular wall and femoral head fracture, with or without internal or external fixation                                                                                                                                      | Open treatment of fracture, hip or pelvis   |
| 27253     | Open treatment of hip dislocation, traumatic, without internal fixation                                                                                                                                                                                                          | Open treatment of fracture, hip or pelvis   |
| 27248     | Open treatment of greater trochanteric fracture, includes internal fixation, when performed                                                                                                                                                                                      | Open treatment of fracture, hip or pelvis   |
| 27245     | Treatment of intertrochanteric, peritrochanteric, or subtrochanteric femoral fracture; with intramedullary implant, with or without interlocking screws and/or cerclage                                                                                                          | Open treatment of fracture, hip or pelvis   |
| 27244     | Treatment of intertrochanteric, peritrochanteric, or subtrochanteric femoral fracture; with plate/screw type implant, with or without cerclage                                                                                                                                   | Open treatment of fracture, hip or pelvis   |
| 27236     | Open treatment of femoral fracture, proximal end, neck, internal fixation or prosthetic replacement                                                                                                                                                                              | Open treatment of fracture, hip or pelvis   |
| 27228     | Open treatment of acetabular fracture(s) involving anterior and posterior (2) columns, includes T-fracture and both column fracture with complete articular detachment, or single column or transverse fracture with associated acetabular wall fracture, with internal fixation | Open treatment of fracture, hip or pelvis   |
| 27227     | Open treatment of acetabular fracture(s) involving anterior or posterior (1) column, or a fracture running transversely across the acetabulum, with internal fixation                                                                                                            | Open treatment of fracture, hip or pelvis   |
| 27226     | Open treatment of posterior or anterior acetabular wall fracture, with internal fixation                                                                                                                                                                                         | Open treatment of fracture, hip or pelvis   |
| 27218     | Open treatment of posterior pelvic bone fracture and/or dislocation, for fracture patterns that disrupt the pelvic ring, unilateral, includes internal fixation, when performed (includes ipsilateral ilium, sacroiliac joint and/or sacrum)                                     | Open treatment of fracture, hip or pelvis   |
| 27217     | Open treatment of anterior pelvic bone fracture and/or dislocation for fracture patterns that disrupt the pelvic ring, unilateral, includes internal fixation, when performed (includes pubic symphysis and/or ipsilateral superior/inferior rami)                               | Open treatment of fracture, hip or pelvis   |
| 27215     | Open treatment of iliac spine(s), tuberosity avulsion, or iliac wing fracture(s), unilateral, for pelvic bone fracture patterns that do not disrupt the pelvic ring, includes internal fixation, when performed                                                                  | Open treatment of fracture, hip or pelvis   |
| 27848     | Open treatment of ankle dislocation, with or without percutaneous skeletal fixation; with repair or internal or external fixation                                                                                                                                                | Open treatment of fracture, lower extremity |

| Continued |                                                                                                                                                                                                 |                                             |
|-----------|-------------------------------------------------------------------------------------------------------------------------------------------------------------------------------------------------|---------------------------------------------|
| Code      | Code description                                                                                                                                                                                | Procedure type                              |
| 27846     | Open treatment of ankle dislocation, with or without percutaneous skeletal fixation; without repair or internal fixation                                                                        | Open treatment of fracture, lower extremity |
| 27829     | Open treatment of distal tibiofibular joint (syndesmosis) disruption, includes internal fixation, when performed                                                                                | Open treatment of fracture, lower extremity |
| 27828     | Open treatment of fracture of weight bearing articular surface/portion of distal tibia (eg, pilon or tibial plafond), with internal fixation, when performed; of both tibia and fibula          | Open treatment of fracture, lower extremity |
| 27827     | Open treatment of fracture of weight bearing articular surface/portion of distal tibia (eg, pilon or tibial plafond), with internal fixation, when performed; of tibia only                     | Open treatment of fracture, lower extremity |
| 27826     | Open treatment of fracture of weight bearing articular surface/portion of distal tibia (eg, pilon or tibial plafond), with internal fixation, when performed; of fibula only                    | Open treatment of fracture, lower extremity |
| 27823     | Open treatment of trimalleolar ankle fracture, includes internal fixation, when performed, medial and/or lateral malleolus; with fixation of posterior lip                                      | Open treatment of fracture, lower extremity |
| 27822     | Open treatment of trimalleolar ankle fracture, includes internal fixation, when performed, medial and/or lateral malleolus; without fixation of posterior lip                                   | Open treatment of fracture, lower extremity |
| 27814     | Open treatment of bimalleolar ankle fracture (eg, lateral and medial malleoli, or lateral and posterior malleoli, or medial and posterior malleoli), includes internal fixation, when performed | Open treatment of fracture, lower extremity |
| 27792     | Open treatment of distal fibular fracture (lateral malleolus), includes internal fixation, when performed                                                                                       | Open treatment of fracture, lower extremity |
| 27784     | Open treatment of proximal fibula or shaft fracture, includes internal fixation, when performed                                                                                                 | Open treatment of fracture, lower extremity |
| 27769     | Open treatment of posterior malleolus fracture, includes internal fixation, when performed                                                                                                      | Open treatment of fracture, lower extremity |
| 27766     | Open treatment of medial malleolus fracture - open, includes internal fixation, when performed                                                                                                  | Open treatment of fracture, lower extremity |
| 27519     | Open treatment of distal femoral epiphyseal separation, includes internal fixation, when performed                                                                                              | Open treatment of fracture, lower extremity |
| 27514     | Open treatment of femoral fracture, distal end, medial or lateral condyle, includes internal fixation, when performed                                                                           | Open treatment of fracture, lower extremity |
| 28645     | Open treatment of metatarsophalangeal joint dislocation, includes internal fixation, when performed                                                                                             | Open treatment of fracture, lower extremity |
| 28615     | Open treatment of tarsometatarsal joint dislocation, includes internal fixation, when performed                                                                                                 | Open treatment of fracture, lower extremity |
| 28585     | Open treatment of talotarsal joint dislocation, includes internal fixation, when performed                                                                                                      | Open treatment of fracture, lower extremity |
| 28555     | Open treatment of tarsal bone dislocation, includes internal fixation, when performed                                                                                                           | Open treatment of fracture, lower extremity |
| 28531     | Open treatment of sesamoid fracture, with or without internal fixation                                                                                                                          | Open treatment of fracture, lower extremity |
| 28525     | Open treatment of fracture, phalanx or phalanges, other than great toe, includes internal fixation, when performed, each                                                                        | Open treatment of fracture, lower extremity |
| 28505     | Open treatment of fracture, great toe, phalanx or phalanges, includes internal fixation, when performed                                                                                         | Open treatment of fracture, lower extremity |
| 28485     | Open treatment of metatarsal fracture, includes internal fixation, when performed, each                                                                                                         | Open treatment of fracture, lower extremity |
| 28465     | Open treatment of tarsal bone fracture (except talus and calcaneus), includes internal fixation, when performed, each                                                                           | Open treatment of fracture, lower extremity |
| 28445     | Open treatment of talus fracture, includes internal fixation, when performed                                                                                                                    | Open treatment of fracture, lower extremity |
| 28420     | Open treatment of calcaneal fracture, includes internal fixation, when performed; with primary iliac or other autogenous bone graft (includes obtaining graft)                                  | Open treatment of fracture, lower extremity |
| 28415     | Open treatment of calcaneal fracture, includes internal fixation, when performed;                                                                                                               | Open treatment of fracture, lower extremity |
| 27832     | Open treatment of proximal tibiofibular joint dislocation, includes internal fixation, when performed, or with excision of proximal fibula                                                      | Open treatment of fracture, lower extremity |
| 27566     | Open treatment of patellar dislocation, with or without partial or total patellectomy                                                                                                           | Open treatment of fracture, lower extremity |
| 27558     | Open treatment of knee dislocation, includes internal fixation, when performed; with primary ligamentous repair, with augmentation/reconstruction                                               | Open treatment of fracture, lower extremity |
| 27557     | Open treatment of knee dislocation, includes internal fixation, when performed; with primary ligamentous repair                                                                                 | Open treatment of fracture, lower extremity |
| 27556     | Open treatment of knee dislocation, includes internal fixation, when performed; without primary ligamentous repair or augmentation/reconstruction                                               | Open treatment of fracture, lower extremity |
| 27540     | Open treatment of intercondylar spine(s) and/or tuberosity fracture(s) of the knee, includes internal fixation, when performed                                                                  | Open treatment of fracture, lower extremity |

| Continued |                                                                                                                                                                                                                                                                                   |                                             |
|-----------|-----------------------------------------------------------------------------------------------------------------------------------------------------------------------------------------------------------------------------------------------------------------------------------|---------------------------------------------|
| Code      | Code description                                                                                                                                                                                                                                                                  | Procedure type                              |
| 27536     | Open treatment of tibial fracture, proximal (plateau); bicondylar, with or without internal fixation                                                                                                                                                                              | Open treatment of fracture, lower extremity |
| 27535     | Open treatment of tibial fracture, proximal (plateau); unicondylar, includes internal fixation, when performed                                                                                                                                                                    | Open treatment of fracture, lower extremity |
| 27524     | Open treatment of patellar fracture, with internal fixation and/or partial or complete patellectomy and soft tissue repair                                                                                                                                                        | Open treatment of fracture, lower extremity |
| 27759     | Treatment of tibial shaft fracture (with or without fibular fracture) by intramedullary implant, with or without interlocking screws and/or cerclage                                                                                                                              | Open treatment of fracture, lower extremity |
| 27758     | Open treatment of tibial shaft fracture (with or without fibular fracture), with plate/screws, with or without cerclage                                                                                                                                                           | Open treatment of fracture, lower extremity |
| 24685     | Open treatment of ulnar fracture, proximal end (eg, olecranon or coronoid process(es)), includes internal fixation, when performed                                                                                                                                                | Open treatment of fracture, upper extremity |
| 24666     | Open treatment of radial head or neck fracture, includes internal fixation or radial head excision, when performed; with radial head prosthetic replacement                                                                                                                       | Open treatment of fracture, upper extremity |
| 24665     | Open treatment of radial head or neck fracture, includes internal fixation or radial head excision, when performed;                                                                                                                                                               | Open treatment of fracture, upper extremity |
| 24635     | Open treatment of Monteggia type of fracture dislocation at elbow (fracture proximal end of ulna with dislocation of radial head), includes internal fixation, when performed                                                                                                     | Open treatment of fracture, upper extremity |
| 24615     | Open treatment of acute or chronic elbow dislocation                                                                                                                                                                                                                              | Open treatment of fracture, upper extremity |
| 24587     | Open treatment of periarticular fracture and/or dislocation of the elbow (fracture distal humerus and proximal ulna and/or proximal radius); with implant arthroplasty                                                                                                            | Open treatment of fracture, upper extremity |
| 24586     | Open treatment of periarticular fracture and/or dislocation of the elbow (fracture distal humerus and proximal ulna and/or proximal radius);                                                                                                                                      | Open treatment of fracture, upper extremity |
| 25575     | Open treatment of radial AND ulnar shaft fractures, with internal fixation, when performed; of radius AND ulna                                                                                                                                                                    | Open treatment of fracture, upper extremity |
| 25574     | Open treatment of radial AND ulnar shaft fractures, with internal fixation, when performed; of radius OR ulna                                                                                                                                                                     | Open treatment of fracture, upper extremity |
| 25545     | Open treatment of ulnar shaft fracture, includes internal fixation, when performed                                                                                                                                                                                                | Open treatment of fracture, upper extremity |
| 25526     | Open treatment of radial shaft fracture, includes internal fixation, when performed, and open treatment of distal radioulnar joint dislocation (Galeazzi fracture/ dislocation), includes internal fixation, when performed, includes repair of triangular fibrocartilage complex | Open treatment of fracture, upper extremity |
| 25525     | Open treatment of radial shaft fracture, includes internal fixation, when performed, and closed treatment of distal radioulnar joint dislocation (Galeazzi fracture/ dislocation), includes percutaneous skeletal fixation, when performed                                        | Open treatment of fracture, upper extremity |
| 25515     | Open treatment of radial shaft fracture, includes internal fixation, when performed                                                                                                                                                                                               | Open treatment of fracture, upper extremity |
| 28675     | Open treatment of interphalangeal joint dislocation, includes internal fixation, when performed                                                                                                                                                                                   | Open treatment of fracture, upper extremity |
| 26785     | Open treatment of interphalangeal joint dislocation, includes internal fixation, when performed, single                                                                                                                                                                           | Open treatment of fracture, upper extremity |
| 26765     | Open treatment of distal phalangeal fracture, finger or thumb, includes internal fixation, when performed, each                                                                                                                                                                   | Open treatment of fracture, upper extremity |
| 26746     | Open treatment of articular fracture, involving metacarpophalangeal or interphalangeal joint, includes internal fixation, when performed, each                                                                                                                                    | Open treatment of fracture, upper extremity |
| 26735     | Open treatment of phalangeal shaft fracture, proximal or middle phalanx, finger or thumb, includes internal fixation, when performed, each                                                                                                                                        | Open treatment of fracture, upper extremity |
| 26715     | Open treatment of metacarpophalangeal dislocation, single, includes internal fixation, when performed                                                                                                                                                                             | Open treatment of fracture, upper extremity |
| 26686     | Open treatment of carpometacarpal dislocation, other than thumb; complex, multiple, or delayed reduction                                                                                                                                                                          | Open treatment of fracture, upper extremity |
| 26685     | Open treatment of carpometacarpal dislocation, other than thumb; includes internal fixation, when performed, each joint                                                                                                                                                           | Open treatment of fracture, upper extremity |
| 26665     | Open treatment of carpometacarpal fracture dislocation, thumb (Bennett fracture), includes internal fixation, when performed                                                                                                                                                      | Open treatment of fracture, upper extremity |
| 26615     | Open treatment of metacarpal fracture, single, includes internal fixation, when performed, each bone                                                                                                                                                                              | Open treatment of fracture, upper extremity |
| 24579     | Open treatment of humeral condylar fracture, medial or lateral, includes internal fixation, when performed                                                                                                                                                                        | Open treatment of fracture, upper extremity |
| 24575     | Open treatment of humeral epicondylar fracture, medial or lateral, includes internal fixation, when performed                                                                                                                                                                     | Open treatment of fracture, upper extremity |

| Continued |                                                                                                                                                                                                                       |                                             |
|-----------|-----------------------------------------------------------------------------------------------------------------------------------------------------------------------------------------------------------------------|---------------------------------------------|
| Code      | Code description                                                                                                                                                                                                      | Procedure type                              |
| 24546     | Open treatment of humeral supracondylar or transcondylar fracture, includes internal fixation, when performed; with intercondylar extension                                                                           | Open treatment of fracture, upper extremity |
| 24545     | Open treatment of humeral supracondylar or transcondylar fracture, includes internal fixation, when performed; without intercondylar extension                                                                        | Open treatment of fracture, upper extremity |
| 24516     | Treatment of humeral shaft fracture, with insertion of intramedullary implant, with or without cerclage and/or locking screws                                                                                         | Open treatment of fracture, upper extremity |
| 24515     | Open treatment of humeral shaft fracture with plate/screws, with or without cerclage                                                                                                                                  | Open treatment of fracture, upper extremity |
| 23680     | Open treatment of shoulder dislocation, with surgical or anatomical neck fracture, includes internal fixation, when performed                                                                                         | Open treatment of fracture, upper extremity |
| 23670     | Open treatment of shoulder dislocation, with fracture of greater humeral tuberosity, includes internal fixation, when performed                                                                                       | Open treatment of fracture, upper extremity |
| 23660     | Open treatment of acute shoulder dislocation                                                                                                                                                                          | Open treatment of fracture, upper extremity |
| 23630     | Open treatment of greater humeral tuberosity fracture, includes internal fixation, when performed                                                                                                                     | Open treatment of fracture, upper extremity |
| 23616     | Open treatment of proximal humeral (surgical or anatomical neck) fracture, includes internal fixation, when performed, includes repair of tuberosity(s), when performed; with proximal humeral prosthetic replacement | Open treatment of fracture, upper extremity |
| 23615     | Open treatment of proximal humeral (surgical or anatomical neck) fracture, includes internal fixation, when performed, includes repair of tuberosity(s), when performed;                                              | Open treatment of fracture, upper extremity |
| 23585     | Open treatment of scapular fracture (body, glenoid or acromion) includes internal fixation, when performed                                                                                                            | Open treatment of fracture, upper extremity |
| 23552     | Open treatment of acromioclavicular dislocation, acute or chronic; with fascial graft (includes obtaining graft)                                                                                                      | Open treatment of fracture, upper extremity |
| 23550     | Open treatment of acromioclavicular dislocation, acute or chronic;                                                                                                                                                    | Open treatment of fracture, upper extremity |
| 25695     | Open treatment of lunate dislocation                                                                                                                                                                                  | Open treatment of fracture, upper extremity |
| 25685     | Open treatment of trans-scaphoperilunar type of fracture dislocation                                                                                                                                                  | Open treatment of fracture, upper extremity |
| 25676     | Open treatment of distal radioulnar dislocation, acute or chronic                                                                                                                                                     | Open treatment of fracture, upper extremity |
| 25670     | Open treatment of radiocarpal or intercarpal dislocation, 1 or more bones                                                                                                                                             | Open treatment of fracture, upper extremity |
| 25652     | Open treatment of ulnar styloid fracture                                                                                                                                                                              | Open treatment of fracture, upper extremity |
| 25645     | Open treatment of carpal bone fracture (other than carpal scaphoid [navicular]), each bone                                                                                                                            | Open treatment of fracture, upper extremity |
| 25628     | Open treatment of carpal scaphoid (navicular) fracture, includes internal fixation, when performed                                                                                                                    | Open treatment of fracture, upper extremity |
| 25609     | Open treatment of distal radial intra-articular fracture or epiphyseal separation; with internal fixation of 3 or more fragments                                                                                      | Open treatment of fracture, upper extremity |
| 25608     | Open treatment of distal radial intra-articular fracture or epiphyseal separation; with internal fixation of 2 fragments                                                                                              | Open treatment of fracture, upper extremity |
| 25607     | Open treatment of distal radial extra-articular fracture or epiphyseal separation, with internal fixation                                                                                                             | Open treatment of fracture, upper extremity |
| 21825     | Open treatment of sternum fracture with or without skeletal fixation                                                                                                                                                  | Open treatment of rib fracture              |
| 21813     | Open treatment of rib fracture(s) with internal fixation, includes thoracoscopic visualization when performed, unilateral; 7 or more ribs                                                                             | Open treatment of rib fracture              |
| 21812     | Open treatment of rib fracture(s) with internal fixation, includes thoracoscopic visualization when performed, unilateral; 4-6 ribs                                                                                   | Open treatment of rib fracture              |
| 21811     | Open treatment of rib fracture(s) with internal fixation, includes thoracoscopic visualization when performed, unilateral; 1-3 ribs                                                                                   | Open treatment of rib fracture              |
| 21805     | Open treatment of rib fracture without fixation, each                                                                                                                                                                 | Open treatment of rib fracture              |
| 27178     | Open treatment of slipped femoral epiphysis; closed manipulation with single or multiple pinning                                                                                                                      | Open treatment of slipped femoral epiphysis |
| 27181     | Open treatment of slipped femoral epiphysis; osteotomy and internal fixation                                                                                                                                          | Open treatment of slipped femoral epiphysis |
| 27179     | Open treatment of slipped femoral epiphysis; osteoplasty of femoral neck (Heyman type procedure)                                                                                                                      | Open treatment of slipped femoral epiphysis |
| 27177     | Open treatment of slipped femoral epiphysis; single or multiple pinning or bone graft (includes obtaining graft)                                                                                                      | Open treatment of slipped femoral epiphysis |
| 27176     | Treatment of slipped femoral epiphysis; by single or multiple pinning, in situ                                                                                                                                        | Open treatment of slipped femoral epiphysis |

| Continued |                                                                                                                                                                                                                                  |                                                                                               |
|-----------|----------------------------------------------------------------------------------------------------------------------------------------------------------------------------------------------------------------------------------|-----------------------------------------------------------------------------------------------|
| Code      | Code description                                                                                                                                                                                                                 | Procedure type                                                                                |
| 27175     | Treatment of slipped femoral epiphysis; by traction, without reduction                                                                                                                                                           | Open treatment of slipped femoral epiphysis                                                   |
| 27202     | Open treatment of coccygeal fracture                                                                                                                                                                                             | Open treatment of spinal fracture                                                             |
| 22327     | Open treatment and/or reduction of vertebral fracture(s) and/or dislocation(s), posterior approach, 1 fractured vertebra or dislocated segment; thoracic                                                                         | Open treatment of spinal fracture                                                             |
| 22326     | Open treatment and/or reduction of vertebral fracture(s) and/or dislocation(s), posterior approach, 1 fractured vertebra or dislocated segment; cervical                                                                         | Open treatment of spinal fracture                                                             |
| 22325     | Open treatment and/or reduction of vertebral fracture(s) and/or dislocation(s), posterior approach, 1 fractured vertebra or dislocated segment; lumbar                                                                           | Open treatment of spinal fracture                                                             |
| 22319     | Open treatment and/or reduction of odontoid fracture(s) and or dislocation(s) (including os odontoideum), anterior approach, including placement of internal fixation; with grafting                                             | Open treatment of spinal fracture                                                             |
| 22318     | Open treatment and/or reduction of odontoid fracture(s) and or dislocation(s) (including os odontoideum), anterior approach, including placement of internal fixation; without grafting                                          | Open treatment of spinal fracture                                                             |
| 33261     | Operative ablation of ventricular arrhythmogenic focus with cardiopulmonary bypass                                                                                                                                               | Operative ablation of arrhythmogenic focus or pathway, with or without cardiopulmonary bypass |
| 33251     | Operative ablation of supraventricular arrhythmogenic focus or pathway (eg, Wolff-Parkinson-White, atrioventricular node re-entry), tract(s) and/or focus (foci); with cardiopulmonary bypass                                    | Operative ablation of arrhythmogenic focus or pathway, with or without cardiopulmonary bypass |
| 33250     | Operative ablation of supraventricular arrhythmogenic focus or pathway (eg, Wolff-Parkinson-White, atrioventricular node re-entry), tract(s) and/or focus (foci); without cardiopulmonary bypass                                 | Operative ablation of arrhythmogenic focus or pathway, with or without cardiopulmonary bypass |
| 33266     | Endoscopy, surgical; operative tissue ablation and reconstruction of atria, extensive (eg, maze procedure), without cardiopulmonary bypass                                                                                       | Operative tissue ablation and reconstruction of atria - endoscopic                            |
| 33265     | Endoscopy, surgical; operative tissue ablation and reconstruction of atria, limited (eg, modified maze procedure), without cardiopulmonary bypass                                                                                | Operative tissue ablation and reconstruction of atria - endoscopic                            |
| 33256     | Operative tissue ablation and reconstruction of atria, extensive (eg, maze procedure); with cardiopulmonary bypass                                                                                                               | Operative tissue ablation and reconstruction of atria - open                                  |
| 33255     | Operative tissue ablation and reconstruction of atria, extensive (eg, maze procedure); without cardiopulmonary bypass                                                                                                            | Operative tissue ablation and reconstruction of atria - open                                  |
| 33254     | Operative tissue ablation and reconstruction of atria, limited (eg, modified maze procedure)                                                                                                                                     | Operative tissue ablation and reconstruction of atria - open                                  |
| 67570     | Optic nerve decompression (eg, incision or fenestration of optic nerve sheath)                                                                                                                                                   | Optic nerve decompression                                                                     |
| 61592     | Orbitocranial zygomatic approach to middle cranial fossa (cavernous sinus and carotid artery, clivus, basilar artery or petrous apex) including osteotomy of zygoma, craniotomy, extra- or intradural elevation of temporal lobe | Orbitocranial zygomatic approach to middle cranial fossa                                      |
| 67445     | Orbitotomy with bone flap or window, lateral approach (eg, Kroenlein); with removal of bone for decompression                                                                                                                    | Orbitotomy                                                                                    |
| 67440     | Orbitotomy with bone flap or window, lateral approach (eg, Kroenlein); with drainage                                                                                                                                             | Orbitotomy                                                                                    |
| 67430     | Orbitotomy with bone flap or window, lateral approach (eg, Kroenlein); with removal of foreign body                                                                                                                              | Orbitotomy                                                                                    |
| 67420     | Orbitotomy with bone flap or window, lateral approach (eg, Kroenlein); with removal of lesion                                                                                                                                    | Orbitotomy                                                                                    |
| 67414     | Orbitotomy without bone flap (frontal or transconjunctival approach); with removal of bone for decompression                                                                                                                     | Orbitotomy                                                                                    |
| 67413     | Orbitotomy without bone flap (frontal or transconjunctival approach); with removal of foreign body                                                                                                                               | Orbitotomy                                                                                    |
| 67412     | Orbitotomy without bone flap (frontal or transconjunctival approach); with removal of lesion                                                                                                                                     | Orbitotomy                                                                                    |
| 54535     | Orchiectomy, radical, for tumor; with abdominal exploration                                                                                                                                                                      | Orchiectomy - open                                                                            |
| 54530     | Orchiectomy, radical, for tumor; inguinal approach                                                                                                                                                                               | Orchiectomy - open                                                                            |
| 54522     | Orchiectomy, partial                                                                                                                                                                                                             | Orchiectomy - open                                                                            |
| 54520     | Orchiectomy, simple (including subcapsular), with or without testicular prosthesis, scrotal or inguinal approach                                                                                                                 | Orchiectomy - open                                                                            |
| 54692     | Laparoscopy, surgical; orchiopexy for intra-abdominal testis                                                                                                                                                                     | Orchiectomy - laparoscopic                                                                    |
| 54690     | Laparoscopy, surgical; orchiectomy                                                                                                                                                                                               | Orchiectomy - laparoscopic                                                                    |
| 54650     | Orchiopexy, abdominal approach, for intra-abdominal testis (eg, Fowler- Stephens)                                                                                                                                                | Orchiopexy                                                                                    |
| 54640     | Orchiopexy, inguinal approach, with or without hernia repair                                                                                                                                                                     | Orchiopexy                                                                                    |
| 28288     | Ostectomy, partial, exostectomy or condylectomy, metatarsal head, each metatarsal head                                                                                                                                           | Ostectomy of foot and/or toes                                                                 |

| Continued |                                                                                                                                                       |                                      |
|-----------|-------------------------------------------------------------------------------------------------------------------------------------------------------|--------------------------------------|
| Code      | Code description                                                                                                                                      | Procedure type                       |
| 28119     | Ostectomy, calcaneus; for spur, with or without plantar fascial release                                                                               | Ostectomy of foot and/or toes        |
| 28118     | Ostectomy, calcaneus;                                                                                                                                 | Ostectomy of foot and/or toes        |
| 28116     | Ostectomy, excision of tarsal coalition                                                                                                               | Ostectomy of foot and/or toes        |
| 28114     | Ostectomy, complete excision; all metatarsal heads, with partial proximal phalangectomy, excluding first metatarsal (eg, Clayton type procedure)      | Ostectomy of foot and/or toes        |
| 28113     | Ostectomy, complete excision; fifth metatarsal head                                                                                                   | Ostectomy of foot and/or toes        |
| 28112     | Ostectomy, complete excision; other metatarsal head (second, third or fourth)                                                                         | Ostectomy of foot and/or toes        |
| 28111     | Ostectomy, complete excision; first metatarsal head                                                                                                   | Ostectomy of foot and/or toes        |
| 28110     | Ostectomy, partial excision, fifth metatarsal head (bunionette) (separate procedure)                                                                  | Ostectomy of foot and/or toes        |
| 23190     | Ostectomy of scapula, partial (eg, superior medial angle)                                                                                             | Ostectomy of scapula                 |
| 27416     | Osteochondral autograft(s), knee - open (eg, mosaicplasty) (includes harvesting of autograft[s])                                                      | Osteochondral allograft, knee - open |
| 27415     | Osteochondral allograft, knee - open                                                                                                                  | Osteochondral allograft, knee - open |
| 21209     | Osteoplasty, facial bones; reduction                                                                                                                  | Osteoplasty of facial bones          |
| 21208     | Osteoplasty, facial bones; augmentation (autograft, allograft, or prosthetic implant)                                                                 | Osteoplasty of facial bones          |
| 27468     | Osteoplasty, femur; combined, lengthening and shortening with femoral segment transfer                                                                | Osteoplasty of lower extremity       |
| 27466     | Osteoplasty, femur; lengthening                                                                                                                       | Osteoplasty of lower extremity       |
| 27465     | Osteoplasty, femur; shortening (excluding 64876)                                                                                                      | Osteoplasty of lower extremity       |
| 27140     | Osteotomy and transfer of greater trochanter of femur (separate procedure)                                                                            | Osteoplasty of lower extremity       |
| 25394     | Osteoplasty, carpal bone, shortening                                                                                                                  | Osteoplasty of upper extremity       |
| 24420     | Osteoplasty, humerus (eg, shortening or lengthening) (excluding 64876)                                                                                | Osteoplasty of upper extremity       |
| 26568     | Osteoplasty, lengthening, metacarpal or phalanx                                                                                                       | Osteoplasty of upper extremity       |
| 25393     | Osteoplasty, radius AND ulna; lengthening with autograft                                                                                              | Osteoplasty of upper extremity       |
| 25392     | Osteoplasty, radius AND ulna; shortening (excluding 64876)                                                                                            | Osteoplasty of upper extremity       |
| 25391     | Osteoplasty, radius OR ulna; lengthening with autograft                                                                                               | Osteoplasty of upper extremity       |
| 25390     | Osteoplasty, radius OR ulna; shortening                                                                                                               | Osteoplasty of upper extremity       |
| 23485     | Osteotomy, clavicle, with or without internal fixation; with bone graft for nonunion or malunion (includes obtaining graft and/or necessary fixation) | Osteotomy of clavicle                |
| 23480     | Osteotomy, clavicle, with or without internal fixation;                                                                                               | Osteotomy of clavicle                |
| 21206     | Osteotomy, maxilla, segmental (eg, Wassmund or Schuchard)                                                                                             | Osteotomy of facial bones            |
| 21199     | Osteotomy, mandible, segmental; with genioglossus advancement                                                                                         | Osteotomy of facial bones            |
| 21198     | Osteotomy, mandible, segmental;                                                                                                                       | Osteotomy of facial bones            |
| 27454     | Osteotomy, multiple, with realignment on intramedullary rod, femoral shaft (eg, Sofield type procedure)                                               | Osteotomy of lower extremity         |
| 27450     | Osteotomy, femur, shaft or supracondylar; with fixation                                                                                               | Osteotomy of lower extremity         |
| 27448     | Osteotomy, femur, shaft or supracondylar; without fixation                                                                                            | Osteotomy of lower extremity         |
| 27165     | Osteotomy, intertrochanteric or subtrochanteric including internal or external fixation and/or cast                                                   | Osteotomy of lower extremity         |
| 27161     | Osteotomy, femoral neck (separate procedure)                                                                                                          | Osteotomy of lower extremity         |
| 28312     | Osteotomy, shortening, angular or rotational correction; other phalanges, any toe                                                                     | Osteotomy of lower extremity         |
| 28310     | Osteotomy, shortening, angular or rotational correction; proximal phalanx, first toe (separate procedure)                                             | Osteotomy of lower extremity         |
| 28309     | Osteotomy, with or without lengthening, shortening or angular correction, metatarsal; multiple (eg, Swanson type cavus foot procedure)                | Osteotomy of lower extremity         |
| 28308     | Osteotomy, with or without lengthening, shortening or angular correction, metatarsal; other than first metatarsal, each                               | Osteotomy of lower extremity         |
| 28307     | Osteotomy, with or without lengthening, shortening or angular correction, metatarsal; first metatarsal with autograft (other than first toe)          | Osteotomy of lower extremity         |
| 28306     | Osteotomy, with or without lengthening, shortening or angular correction, metatarsal; first metatarsal                                                | Osteotomy of lower extremity         |
| 28305     | Osteotomy, tarsal bones, other than calcaneus or talus; with autograft (includes obtaining graft) (eg, Fowler type)                                   | Osteotomy of lower extremity         |
| 28304     | Osteotomy, tarsal bones, other than calcaneus or talus;                                                                                               | Osteotomy of lower extremity         |
| 28302     | Osteotomy; talus                                                                                                                                      | Osteotomy of lower extremity         |

| Continued |                                                                                                                                                                        |                                                                                               |
|-----------|------------------------------------------------------------------------------------------------------------------------------------------------------------------------|-----------------------------------------------------------------------------------------------|
| Code      | Code description                                                                                                                                                       | Procedure type                                                                                |
| 28300     | Osteotomy; calcaneus (eg, Dwyer or Chambers type procedure), with or without internal fixation                                                                         | Osteotomy of lower extremity                                                                  |
| 27715     | Osteoplasty, tibia and fibula, lengthening or shortening                                                                                                               | Osteotomy of lower extremity                                                                  |
| 27712     | Osteotomy; multiple, with realignment on intramedullary rod (eg, Sofield type procedure)                                                                               | Osteotomy of lower extremity                                                                  |
| 27709     | Osteotomy; tibia and fibula                                                                                                                                            | Osteotomy of lower extremity                                                                  |
| 27707     | Osteotomy; fibula                                                                                                                                                      | Osteotomy of lower extremity                                                                  |
| 27705     | Osteotomy; tibia                                                                                                                                                       | Osteotomy of lower extremity                                                                  |
| 27457     | Osteotomy, proximal tibia, including fibular excision or osteotomy (includes correction of genu varus [bowleg] or genu valgus [knock-knee]); after epiphyseal closure  | Osteotomy of lower extremity                                                                  |
| 27455     | Osteotomy, proximal tibia, including fibular excision or osteotomy (includes correction of genu varus [bowleg] or genu valgus [knock-knee]); before epiphyseal closure | Osteotomy of lower extremity                                                                  |
| 27158     | Osteotomy, pelvis, bilateral (eg, congenital malformation)                                                                                                             | Osteotomy of pelvis                                                                           |
| 27156     | Osteotomy, iliac, acetabular or innominate bone; with femoral osteotomy and with open reduction of hip                                                                 | Osteotomy of pelvis                                                                           |
| 27151     | Osteotomy, iliac, acetabular or innominate bone; with femoral osteotomy                                                                                                | Osteotomy of pelvis                                                                           |
| 27147     | Osteotomy, iliac, acetabular or innominate bone; with open reduction of hip                                                                                            | Osteotomy of pelvis                                                                           |
| 27146     | Osteotomy, iliac, acetabular or innominate bone;                                                                                                                       | Osteotomy of pelvis                                                                           |
| 22224     | Osteotomy of spine, including discectomy, anterior approach, single vertebral segment; lumbar                                                                          | Osteotomy of spine                                                                            |
| 22222     | Osteotomy of spine, including discectomy, anterior approach, single vertebral segment; thoracic                                                                        | Osteotomy of spine                                                                            |
| 22220     | Osteotomy of spine, including discectomy, anterior approach, single vertebral segment; cervical                                                                        | Osteotomy of spine                                                                            |
| 22214     | Osteotomy of spine, posterior or posterolateral approach, 1 vertebral segment; lumbar                                                                                  | Osteotomy of spine                                                                            |
| 22212     | Osteotomy of spine, posterior or posterolateral approach, 1 vertebral segment; thoracic                                                                                | Osteotomy of spine                                                                            |
| 22210     | Osteotomy of spine, posterior or posterolateral approach, 1 vertebral segment; cervical                                                                                | Osteotomy of spine                                                                            |
| 22207     | Osteotomy of spine, posterior or posterolateral approach, 3 columns, 1 vertebral segment (eg, pedicle/vertebral body subtraction); lumbar                              | Osteotomy of spine                                                                            |
| 22206     | Osteotomy of spine, posterior or posterolateral approach, 3 columns, 1 vertebral segment (eg, pedicle/vertebral body subtraction); thoracic                            | Osteotomy of spine                                                                            |
| 26567     | Osteotomy; phalanx of finger, each                                                                                                                                     | Osteotomy of upper extremity                                                                  |
| 26565     | Osteotomy; metacarpal, each                                                                                                                                            | Osteotomy of upper extremity                                                                  |
| 24410     | Multiple osteotomies with realignment on intramedullary rod, humeral shaft (Sofield type procedure)                                                                    | Osteotomy of upper extremity                                                                  |
| 24400     | Osteotomy, humerus, with or without internal fixation                                                                                                                  | Osteotomy of upper extremity                                                                  |
| 25375     | Multiple osteotomies, with realignment on intramedullary rod (Sofield type procedure); radius AND ulna                                                                 | Osteotomy of upper extremity                                                                  |
| 25370     | Multiple osteotomies, with realignment on intramedullary rod (Sofield type procedure); radius OR ulna                                                                  | Osteotomy of upper extremity                                                                  |
| 25365     | Osteotomy; radius AND ulna                                                                                                                                             | Osteotomy of upper extremity                                                                  |
| 25360     | Osteotomy; ulna                                                                                                                                                        | Osteotomy of upper extremity                                                                  |
| 25355     | Osteotomy, radius; middle or proximal third                                                                                                                            | Osteotomy of upper extremity                                                                  |
| 25350     | Osteotomy, radius; distal third                                                                                                                                        | Osteotomy of upper extremity                                                                  |
| 61345     | Other cranial decompression, posterior fossa                                                                                                                           | Other cranial decompression, posterior fossa                                                  |
| 20926     | Tissue grafts, other (eg, paratenon, fat, dermis)                                                                                                                      | Other tissue grafts                                                                           |
| 33478     | Outflow tract augmentation (gusset), with or without commissurotomy or infundibular resection                                                                          | Outflow tract augmentation (gusset), with or without commissurotomy or infundibular resection |
| 58925     | Ovarian cystectomy, unilateral or bilateral                                                                                                                            | Ovarian cystectomy                                                                            |
| 42225     | Palatoplasty for cleft palate; attachment pharyngeal flap                                                                                                              | Palatoplasty                                                                                  |
| 42220     | Palatoplasty for cleft palate; secondary lengthening procedure                                                                                                         | Palatoplasty                                                                                  |
| 42215     | Palatoplasty for cleft palate; major revision                                                                                                                          | Palatoplasty                                                                                  |
| 42210     | Palatoplasty for cleft palate, with closure of alveolar ridge; with bone graft to alveolar ridge (includes obtaining graft)                                            | Palatoplasty                                                                                  |
| 42205     | Palatoplasty for cleft palate, with closure of alveolar ridge; soft tissue only                                                                                        | Palatoplasty                                                                                  |
| 42200     | Palatoplasty for cleft palate, soft and/or hard palate only                                                                                                            | Palatoplasty                                                                                  |

| Continued |                                                                                                                                                                                                                                                                                                                                    |                                          |
|-----------|------------------------------------------------------------------------------------------------------------------------------------------------------------------------------------------------------------------------------------------------------------------------------------------------------------------------------------|------------------------------------------|
| Code      | Code description                                                                                                                                                                                                                                                                                                                   | Procedure type                           |
| 42145     | Palatopharyngoplasty (eg, uvulopalatopharyngoplasty, uvulopharyngoplasty)                                                                                                                                                                                                                                                          | Palatopharyngoplasty                     |
| 48160     | Pancreatectomy, total or subtotal, with autologous transplantation of pancreas or pancreatic islet cells                                                                                                                                                                                                                           | Pancreatectomy                           |
| 48155     | Pancreatectomy, total                                                                                                                                                                                                                                                                                                              | Pancreatectomy                           |
| 48154     | Pancreatectomy, proximal subtotal with near-total duodenectomy, choledochenterostomy and duodenojejunostomy (pylorus-sparing, Whipple-type procedure); without pancreatojejunostomy                                                                                                                                                | Pancreatectomy                           |
| 48153     | Pancreatectomy, proximal subtotal with near-total duodenectomy, choledochenterostomy and duodenojejunostomy (pylorus-sparing, Whipple-type procedure); with pancreatojejunostomy                                                                                                                                                   | Pancreatectomy                           |
| 48152     | Pancreatectomy, proximal subtotal with total duodenectomy, partial gastrectomy, choledochenterostomy and gastrojejunostomy (Whipple-type procedure); without pancreatojejunostomy                                                                                                                                                  | Pancreatectomy                           |
| 48150     | Pancreatectomy, proximal subtotal with total duodenectomy, partial gastrectomy, choledochenterostomy and gastrojejunostomy (Whipple-type procedure); with pancreatojejunostomy                                                                                                                                                     | Pancreatectomy                           |
| 48146     | Pancreatectomy, distal, near-total with preservation of duodenum (Child- type procedure)                                                                                                                                                                                                                                           | Pancreatectomy                           |
| 48145     | Pancreatectomy, distal subtotal, with or without splenectomy; with pancreaticojejunostomy                                                                                                                                                                                                                                          | Pancreatectomy                           |
| 48140     | Pancreatectomy, distal subtotal, with or without splenectomy; without pancreaticojejunostomy                                                                                                                                                                                                                                       | Pancreatectomy                           |
| 48548     | Pancreaticojejunostomy, side-to-side anastomosis (Puestow-type operation)                                                                                                                                                                                                                                                          | Pancreatic cyst or pseudocyst repair     |
| 48545     | Pancreatorrhaphy for injury                                                                                                                                                                                                                                                                                                        | Pancreatic cyst or pseudocyst repair     |
| 48540     | Internal anastomosis of pancreatic cyst to gastrointestinal tract; Roux-en-Y                                                                                                                                                                                                                                                       | Pancreatic cyst or pseudocyst repair     |
| 48520     | Internal anastomosis of pancreatic cyst to gastrointestinal tract; direct                                                                                                                                                                                                                                                          | Pancreatic cyst or pseudocyst repair     |
| 48510     | External drainage, pseudocyst of pancreas - open                                                                                                                                                                                                                                                                                   | Pancreatic cyst or pseudocyst repair     |
| 48500     | Marsupialization of pancreatic cyst                                                                                                                                                                                                                                                                                                | Pancreatic cyst or pseudocyst repair     |
| 65815     | Paracentesis of anterior chamber of eye (separate procedure); with removal of blood, with or without irrigation and/or air injection                                                                                                                                                                                               | Paracentesis of anterior chamber of eye  |
| 65810     | Paracentesis of anterior chamber of eye (separate procedure); with removal of vitreous and/or dissection of anterior hyaloid membrane, with or without air injection                                                                                                                                                               | Paracentesis of anterior chamber of eye  |
| 60505     | Parathyroidectomy or exploration of parathyroid(s); with mediastinal exploration, sternal split or transthoracic approach                                                                                                                                                                                                          | Parathyroidectomy                        |
| 60502     | Parathyroidectomy or exploration of parathyroid(s); re-exploration                                                                                                                                                                                                                                                                 | Parathyroidectomy                        |
| 60500     | Parathyroidectomy or exploration of parathyroid(s);                                                                                                                                                                                                                                                                                | Parathyroidectomy                        |
| 57423     | Paravaginal defect repair (including repair of cystocele, if performed) - laparoscopic approach                                                                                                                                                                                                                                    | Paravaginal defect repair - laparoscopic |
| 57284     | Paravaginal defect repair (including repair of cystocele, if performed); open abdominal approach                                                                                                                                                                                                                                   | Paravaginal defect repair - open         |
| 57285     | Paravaginal defect repair (including repair of cystocele, if performed); vaginal approach                                                                                                                                                                                                                                          | Paravaginal defect repair - open         |
| 42510     | Parotid duct diversion, bilateral (Wilke type procedure); with ligation of both submandibular (Wharton's) ducts                                                                                                                                                                                                                    | Parotid duct diversion                   |
| 42509     | Parotid duct diversion, bilateral (Wilke type procedure); with excision of both submandibular glands                                                                                                                                                                                                                               | Parotid duct diversion                   |
| 42508     | Parotid duct diversion, bilateral (Wilke type procedure); with excision of 1 submandibular gland                                                                                                                                                                                                                                   | Parotid duct diversion                   |
| 42507     | Parotid duct diversion, bilateral (Wilke type procedure);                                                                                                                                                                                                                                                                          | Parotid duct diversion                   |
| 27350     | Patellectomy or hemipatellectomy                                                                                                                                                                                                                                                                                                   | Patellectomy or hemipatellectomy         |
| 58240     | Pelvic exenteration for gynecologic malignancy, with total abdominal hysterectomy or cervicectomy, with or without removal of tube(s), with or without removal of ovary(s), with removal of bladder and ureteral transplantations, and/or abdominoperineal resection of rectum and colon and colostomy, or any combination thereof | Pelvic exenteration                      |
| 51597     | Pelvic exenteration, complete, for vesical, prostatic or urethral malignancy, with removal of bladder and ureteral transplantations, with or without hysterectomy and/or abdominoperineal resection of rectum and colon and colostomy, or any combination thereof                                                                  | Pelvic exenteration                      |
| 45126     | Pelvic exenteration for colorectal malignancy, with proctectomy (with or without colostomy), with removal of bladder and ureteral transplantations, and/or hysterectomy, or cervicectomy, with or without removal of tube(s), with or without removal of ovary(s), or any combination thereof                                      | Pelvic exenteration                      |

| Continued |                                                                                                                                                                                                                                                                                                         |                                  |
|-----------|---------------------------------------------------------------------------------------------------------------------------------------------------------------------------------------------------------------------------------------------------------------------------------------------------------|----------------------------------|
| Code      | Code description                                                                                                                                                                                                                                                                                        | Procedure type                   |
| 54417     | Removal and replacement of non-inflatable (semi-rigid) or inflatable (self-contained) penile prosthesis through an infected field at the same operative session, including irrigation and debridement of infected tissue                                                                                | Penile prostheses                |
| 54416     | Removal and replacement of non-inflatable (semi-rigid) or inflatable (self-contained) penile prosthesis at the same operative session                                                                                                                                                                   | Penile prostheses                |
| 54415     | Removal of non-inflatable (semi-rigid) or inflatable (self-contained) penile prosthesis, without replacement of prosthesis                                                                                                                                                                              | Penile prostheses                |
| 54411     | Removal and replacement of all components of a multi-component inflatable penile prosthesis through an infected field at the same operative session, including irrigation and debridement of infected tissue                                                                                            | Penile prostheses                |
| 54410     | Removal and replacement of all component(s) of a multi-component, inflatable penile prosthesis at the same operative session                                                                                                                                                                            | Penile prostheses                |
| 54408     | Repair of component(s) of a multi-component, inflatable penile prosthesis                                                                                                                                                                                                                               | Penile prostheses                |
| 54406     | Removal of all components of a multi-component, inflatable penile prosthesis without replacement of prosthesis                                                                                                                                                                                          | Penile prostheses                |
| 54405     | Insertion of multi-component, inflatable penile prosthesis, including placement of pump, cylinders, and reservoir                                                                                                                                                                                       | Penile prostheses                |
| 54401     | Insertion of penile prosthesis; inflatable (self-contained)                                                                                                                                                                                                                                             | Penile prostheses                |
| 54400     | Insertion of penile prosthesis; non-inflatable (semi-rigid)                                                                                                                                                                                                                                             | Penile prostheses                |
| 37790     | Penile venous occlusive procedure                                                                                                                                                                                                                                                                       | Penile reconstruction            |
| 37788     | Penile revascularization, artery, with or without vein graft                                                                                                                                                                                                                                            | Penile reconstruction            |
| 33019     | Pericardial drainage with insertion of indwelling catheter, percutaneous, including CT guidance                                                                                                                                                                                                         | Pericardial drainage             |
| 33018     | Pericardial drainage with insertion of indwelling catheter, percutaneous, including fluoroscopy and/or ultrasound guidance, when performed; birth through 5 years of age or any age with congenital cardiac anomaly                                                                                     | Pericardial drainage             |
| 33017     | Pericardial drainage with insertion of indwelling catheter, percutaneous, including fluoroscopy and/or ultrasound guidance, when performed; 6 years and older without congenital cardiac anomaly                                                                                                        | Pericardial drainage             |
| 93590     | Percutaneous transcatheter closure of paravalvular leak; initial occlusion device, mitral valve                                                                                                                                                                                                         | Percutaneous coronary procedures |
| 93583     | Percutaneous transcatheter septal reduction therapy (eg, alcohol septal ablation) including temporary pacemaker insertion when performed                                                                                                                                                                | Percutaneous coronary procedures |
| 93582     | Percutaneous transcatheter closure of patent ductus arteriosus                                                                                                                                                                                                                                          | Percutaneous coronary procedures |
| 93581     | Percutaneous transcatheter closure of a congenital ventricular septal defect with implant                                                                                                                                                                                                               | Percutaneous coronary procedures |
| 93580     | Percutaneous transcatheter closure of congenital interatrial communication (ie, Fontan fenestration, atrial septal defect) with implant                                                                                                                                                                 | Percutaneous coronary procedures |
| 92997     | Percutaneous transluminal pulmonary artery balloon angioplasty; single vessel                                                                                                                                                                                                                           | Percutaneous coronary procedures |
| 92990     | Percutaneous balloon valvuloplasty; pulmonary valve                                                                                                                                                                                                                                                     | Percutaneous coronary procedures |
| 92987     | Percutaneous balloon valvuloplasty; mitral valve                                                                                                                                                                                                                                                        | Percutaneous coronary procedures |
| 92986     | Percutaneous balloon valvuloplasty; aortic valve                                                                                                                                                                                                                                                        | Percutaneous coronary procedures |
| 92943     | Percutaneous transluminal revascularization of chronic total occlusion, coronary artery, coronary artery branch, or coronary artery bypass graft, any combination of intracoronary stent, atherectomy and angioplasty; single vessel                                                                    | Percutaneous coronary procedures |
| 92941     | Percutaneous transluminal revascularization of acute total/subtotal occlusion during acute myocardial infarction, coronary artery or coronary artery bypass graft, any combination of intracoronary stent, atherectomy and angioplasty, including aspiration thrombectomy when performed, single vessel | Percutaneous coronary procedures |
| 93591     | Percutaneous transcatheter closure of paravalvular leak; initial occlusion device, aortic valve                                                                                                                                                                                                         | Percutaneous coronary procedures |
| 92937     | Percutaneous transluminal revascularization of or through coronary artery bypass graft (internal mammary, free arterial, venous), any combination of intracoronary stent, atherectomy and angioplasty, including distal protection when performed; single vessel                                        | Percutaneous coronary procedures |
| 92933     | Percutaneous transluminal coronary atherectomy, with intracoronary stent, with coronary angioplasty when performed; single major coronary artery or branch                                                                                                                                              | Percutaneous coronary procedures |
| 92928     | Percutaneous transcatheter placement of intracoronary stent(s), with coronary angioplasty when performed; single major coronary artery or branch                                                                                                                                                        | Percutaneous coronary procedures |
| 92924     | Percutaneous transluminal coronary atherectomy, with coronary angioplasty when performed; single major coronary artery or branch                                                                                                                                                                        | Percutaneous coronary procedures |
| 92920     | Percutaneous transluminal coronary angioplasty; single major coronary artery or branch                                                                                                                                                                                                                  | Percutaneous coronary procedures |

| Continued |                                                                                                                                                                                                                                                                                           |                                                                                                         |
|-----------|-------------------------------------------------------------------------------------------------------------------------------------------------------------------------------------------------------------------------------------------------------------------------------------------|---------------------------------------------------------------------------------------------------------|
| Code      | Code description                                                                                                                                                                                                                                                                          | Procedure type                                                                                          |
| 33340     | Percutaneous transcatheter closure of the left atrial appendage with endocardial implant, including fluoroscopy, transseptal puncture, catheter placement(s), left atrial angiography, left atrial appendage angiography, when performed, and radiological supervision and interpretation | Percutaneous coronary procedures                                                                        |
| 57289     | Pereyra procedure, including anterior colporrhaphy                                                                                                                                                                                                                                        | Pereyra procedure, including anterior colporrhaphy                                                      |
| 33031     | Pericardiectomy, subtotal or complete; with cardiopulmonary bypass                                                                                                                                                                                                                        | Pericardiectomy                                                                                         |
| 33030     | Pericardiectomy, subtotal or complete; without cardiopulmonary bypass                                                                                                                                                                                                                     | Pericardiectomy                                                                                         |
| 33020     | Pericardiectomy for removal of clot or foreign body (primary procedure)                                                                                                                                                                                                                   | Pericardiectomy for removal of clot or foreign body                                                     |
| 56810     | Perineoplasty, repair of perineum, nonobstetrical (separate procedure)                                                                                                                                                                                                                    | Perineoplasty, repair of perineum, nonobstetrical                                                       |
| 21268     | Orbital repositioning, periorbital osteotomies, unilateral, with bone grafts; combined intra- and extracranial approach                                                                                                                                                                   | Periorbital osteotomies                                                                                 |
| 21267     | Orbital repositioning, periorbital osteotomies, unilateral, with bone grafts; extracranial approach                                                                                                                                                                                       | Periorbital osteotomies                                                                                 |
| 21263     | Periorbital osteotomies for orbital hypertelorism, with bone grafts; with forehead advancement                                                                                                                                                                                            | Periorbital osteotomies                                                                                 |
| 21261     | Periorbital osteotomies for orbital hypertelorism, with bone grafts; combined intra- and extracranial approach                                                                                                                                                                            | Periorbital osteotomies                                                                                 |
| 21260     | Periorbital osteotomies for orbital hypertelorism, with bone grafts; extracranial approach                                                                                                                                                                                                | Periorbital osteotomies                                                                                 |
| 19371     | Periprosthetic capsulectomy, breast                                                                                                                                                                                                                                                       | Periprosthetic capsulotomy, breast                                                                      |
| 19370     | Open periprosthetic capsulotomy, breast                                                                                                                                                                                                                                                   | Periprosthetic capsulotomy, breast                                                                      |
| 53452     | Periurethral transperineal adjustable balloon continence device; unilateral insertion, including cystourethroscopy and imaging guidance                                                                                                                                                   | Periurethral transperineal adjustable balloon continence device                                         |
| 53451     | Periurethral transperineal adjustable balloon continence device; bilateral insertion, including cystourethroscopy and imaging guidance                                                                                                                                                    | Periurethral transperineal adjustable balloon continence device                                         |
| 42953     | Pharyngoesophageal repair                                                                                                                                                                                                                                                                 | Pharyngoesophageal repair                                                                               |
| 42950     | Pharyngoplasty (plastic or reconstructive operation on pharynx)                                                                                                                                                                                                                           | Pharyngoplasty                                                                                          |
| 42955     | Pharyngostomy (fistulization of pharynx, external for feeding)                                                                                                                                                                                                                            | Pharyngostomy                                                                                           |
| 47801     | Placement of choledochal stent                                                                                                                                                                                                                                                            | Placement of choledochal stent                                                                          |
| 48000     | Placement of drains, peripancreatic, for acute pancreatitis;                                                                                                                                                                                                                              | Placement of drains, peripancreatic, for acute pancreatitis                                             |
| 48001     | Placement of drains, peripancreatic, for acute pancreatitis; with cholecystostomy, gastrostomy, and jejunostomy                                                                                                                                                                           | Placement of drains, peripancreatic, for acute pancreatitis                                             |
| 36680     | Placement of needle for intraosseous infusion                                                                                                                                                                                                                                             | Placement of needle for intraosseous infusion                                                           |
| 44300     | Placement, enterostomy or cecostomy, tube open (eg, for feeding or decompression) (separate procedure)                                                                                                                                                                                    | Placement of enterostomy or cecostomy, tube open                                                        |
| 43773     | Laparoscopy, surgical, gastric restrictive procedure; removal and replacement of adjustable gastric restrictive device component only                                                                                                                                                     | Placement, removal, revision and/or replacement of adjustable gastric restrictive device - laparoscopic |
| 43772     | Laparoscopy, surgical, gastric restrictive procedure; removal of adjustable gastric restrictive device component only                                                                                                                                                                     | Placement, removal, revision and/or replacement of adjustable gastric restrictive device - laparoscopic |
| 43771     | Laparoscopy, surgical, gastric restrictive procedure; revision of adjustable gastric restrictive device component only                                                                                                                                                                    | Placement, removal, revision and/or replacement of adjustable gastric restrictive device - laparoscopic |
| 43770     | Laparoscopy, surgical, gastric restrictive procedure; placement of adjustable gastric restrictive device (eg, gastric band and subcutaneous port components)                                                                                                                              | Placement, removal, revision and/or replacement of adjustable gastric restrictive device - laparoscopic |
| 43774     | Laparoscopy, surgical, gastric restrictive procedure; removal of adjustable gastric restrictive device and subcutaneous port components                                                                                                                                                   | Placement, removal, revision and/or replacement of adjustable gastric restrictive device - laparoscopic |
| 54440     | Plastic operation of penis for injury                                                                                                                                                                                                                                                     | Plastic operation of penis for injury                                                                   |
| 54304     | Plastic operation on penis for correction of chordee or for first stage hypospadias repair with or without transplantation of prepuce and/or skin flaps                                                                                                                                   | Plastic operation of penis to correct chordee or angulation                                             |

| Continued |                                                                                                                                  |                                                                                       |
|-----------|----------------------------------------------------------------------------------------------------------------------------------|---------------------------------------------------------------------------------------|
| Code      | Code description                                                                                                                 | Procedure type                                                                        |
| 54300     | Plastic operation of penis for straightening of chordee (eg, hypospadias), with or without mobilization of urethra               | Plastic operation of penis to correct chordee or angulation                           |
| 54360     | Plastic operation on penis to correct angulation                                                                                 | Plastic operation of penis to correct chordee or angulation                           |
| 54390     | Plastic operation on penis for epispadias distal to external sphincter; with exstrophy of bladder                                | Plastic operation on penis for epispadias                                             |
| 54385     | Plastic operation on penis for epispadias distal to external sphincter; with incontinence                                        | Plastic operation on penis for epispadias                                             |
| 54380     | Plastic operation on penis for epispadias distal to external sphincter;                                                          | Plastic operation on penis for epispadias                                             |
| 57220     | Plastic operation on urethral sphincter, vaginal approach (eg, Kelly urethral plication)                                         | Plastic operation on urethral sphincter, vaginal approach                             |
| 68700     | Plastic repair of canaliculi                                                                                                     | Plastic repair of canaliculi                                                          |
| 56800     | Plastic repair of introitus                                                                                                      | Plastic repair of introitus                                                           |
| 42505     | Plastic repair of salivary duct, sialodochoplasty; secondary or complicated                                                      | Plastic repair of salivary duct, sialodochoplasty                                     |
| 42500     | Plastic repair of salivary duct, sialodochoplasty; primary or simple                                                             | Plastic repair of salivary duct, sialodochoplasty                                     |
| 57230     | Plastic repair of urethrocele                                                                                                    | Plastic repair of urethrocele                                                         |
| 32215     | Pleural scarification for repeat pneumothorax                                                                                    | Pleurodesis                                                                           |
| 32940     | Pneumonolysis, extraperiosteal, including filling or packing procedures                                                          | Pneumonolysis, extraperiosteal, including filling or packing procedures               |
| 32201     | Pneumonostomy; with percutaneous drainage of abscess or cyst                                                                     | Pneumonostomy                                                                         |
| 32200     | Pneumonostomy, with open drainage of abscess or cyst                                                                             | Pneumonostomy                                                                         |
| 26550     | Pollicization of a digit                                                                                                         | Pollicization of a digit                                                              |
| 47701     | Portoenterostomy (eg, Kasai procedure)                                                                                           | Portoenterostomy                                                                      |
| 49013     | Preperitoneal pelvic packing for hemorrhage associated with pelvic trauma, including local exploration                           | Preperitoneal pelvic packing for hemorrhage                                           |
| 45400     | Laparoscopy, surgical; proctopexy (for prolapse)                                                                                 | Proctopexy - laparoscopic                                                             |
| 45402     | Laparoscopy, surgical; proctopexy (for prolapse), with sigmoid resection                                                         | Proctopexy - laparoscopic                                                             |
| 45540     | Proctopexy (eg, for prolapse); abdominal approach                                                                                | Proctopexy - open                                                                     |
| 45550     | Proctopexy (eg, for prolapse); with sigmoid resection, abdominal approach                                                        | Proctopexy - open                                                                     |
| 45541     | Proctopexy (eg, for prolapse); perineal approach                                                                                 | Proctopexy - open                                                                     |
| 45505     | Proctoplasty; for prolapse of mucous membrane                                                                                    | Proctoplasty                                                                          |
| 45500     | Proctoplasty; for stenosis                                                                                                       | Proctoplasty                                                                          |
| 23490     | Prophylactic treatment (nailing, pinning, plating or wiring) with or without methylmethacrylate; clavicle                        | Prophylactic treatment (nailing, pinning, plating or wiring) of bone, clavicle        |
| 27495     | Prophylactic treatment (nailing, pinning, plating, or wiring) with or without methylmethacrylate, femur                          | Prophylactic treatment (nailing, pinning, plating or wiring) of bone, lower extremity |
| 27187     | Prophylactic treatment (nailing, pinning, plating or wiring) with or without methylmethacrylate, femoral neck and proximal femur | Prophylactic treatment (nailing, pinning, plating or wiring) of bone, lower extremity |
| 27745     | Prophylactic treatment (nailing, pinning, plating or wiring) with or without methylmethacrylate, tibia                           | Prophylactic treatment (nailing, pinning, plating or wiring) of bone, lower extremity |
| 25492     | Prophylactic treatment (nailing, pinning, plating or wiring) with or without methylmethacrylate; radius AND ulna                 | Prophylactic treatment (nailing, pinning, plating or wiring) of bone, upper extremity |
| 25491     | Prophylactic treatment (nailing, pinning, plating or wiring) with or without methylmethacrylate; ulna                            | Prophylactic treatment (nailing, pinning, plating or wiring) of bone, upper extremity |
| 25490     | Prophylactic treatment (nailing, pinning, plating or wiring) with or without methylmethacrylate; radius                          | Prophylactic treatment (nailing, pinning, plating or wiring) of bone, upper extremity |
| 24498     | Prophylactic treatment (nailing, pinning, plating or wiring), with or without methylmethacrylate, humeral shaft                  | Prophylactic treatment (nailing, pinning, plating or wiring) of bone, upper extremity |

| Continued |                                                                                                                                                                                                                                                                                   |                                                                                       |
|-----------|-----------------------------------------------------------------------------------------------------------------------------------------------------------------------------------------------------------------------------------------------------------------------------------|---------------------------------------------------------------------------------------|
| Code      | Code description                                                                                                                                                                                                                                                                  | Procedure type                                                                        |
| 23491     | Prophylactic treatment (nailing, pinning, plating or wiring) with or without methylmethacrylate; proximal humerus                                                                                                                                                                 | Prophylactic treatment (nailing, pinning, plating or wiring) of bone, upper extremity |
| 55866     | Laparoscopy, surgical prostatectomy, retropubic radical, including nerve sparing, includes robotic assistance, when performed                                                                                                                                                     | Prostatectomy - laparoscopic                                                          |
| 55815     | Prostatectomy, perineal radical; with bilateral pelvic lymphadenectomy, including external iliac, hypogastric and obturator nodes                                                                                                                                                 | Prostatectomy - open                                                                  |
| 55812     | Prostatectomy, perineal radical; with lymph node biopsy(s) (limited pelvic lymphadenectomy)                                                                                                                                                                                       | Prostatectomy - open                                                                  |
| 55831     | Prostatectomy (including control of postoperative bleeding, vasectomy, meatotomy, urethral calibration and/or dilation, and internal urethrotomy); retropubic, subtotal                                                                                                           | Prostatectomy - open                                                                  |
| 55821     | Prostatectomy (including control of postoperative bleeding, vasectomy, meatotomy, urethral calibration and/or dilation, and internal urethrotomy); suprapubic, subtotal, 1 or 2 stages                                                                                            | Prostatectomy - open                                                                  |
| 55810     | Prostatectomy, perineal radical;                                                                                                                                                                                                                                                  | Prostatectomy - open                                                                  |
| 55840     | Prostatectomy, retropubic radical, with or without nerve sparing;                                                                                                                                                                                                                 | Prostatectomy - open                                                                  |
| 55845     | Prostatectomy, retropubic radical, with or without nerve sparing; with bilateral pelvic lymphadenectomy, including external iliac, hypogastric, and obturator nodes                                                                                                               | Prostatectomy - open                                                                  |
| 55842     | Prostatectomy, retropubic radical, with or without nerve sparing; with lymph node biopsy(s) (limited pelvic lymphadenectomy)                                                                                                                                                      | Prostatectomy - open                                                                  |
| 55801     | Prostatectomy, perineal, subtotal (including control of postoperative bleeding, vasectomy, meatotomy, urethral calibration and/or dilation, and internal urethrotomy)                                                                                                             | Prostatectomy - open                                                                  |
| 31040     | Pterygomaxillary fossa surgery, any approach                                                                                                                                                                                                                                      | Pterygomaxillary fossa surgery                                                        |
| 67909     | Reduction of overcorrection of ptosis                                                                                                                                                                                                                                             | Ptosis correction                                                                     |
| 33915     | Pulmonary artery embolectomy; without cardiopulmonary bypass                                                                                                                                                                                                                      | Pulmonary artery embolectomy                                                          |
| 33910     | Pulmonary artery embolectomy; with cardiopulmonary bypass                                                                                                                                                                                                                         | Pulmonary artery embolectomy                                                          |
| 33606     | Anastomosis of pulmonary artery to aorta (Damas-Kaye-Stansel procedure)                                                                                                                                                                                                           | Pulmonary artery to aorta bypass                                                      |
| 33916     | Pulmonary endarterectomy, with or without embolectomy, with cardiopulmonary bypass                                                                                                                                                                                                | Pulmonary endarterectomy                                                              |
| 33475     | Replacement, pulmonary valve                                                                                                                                                                                                                                                      | Pulmonary valve repair/replacement - open                                             |
| 33474     | Valvotomy, pulmonary valve - open heart; with cardiopulmonary bypass                                                                                                                                                                                                              | Pulmonary valve repair/replacement - open                                             |
| 33472     | Valvotomy, pulmonary valve - open heart; with inflow occlusion                                                                                                                                                                                                                    | Pulmonary valve repair/replacement - open                                             |
| 33471     | Valvotomy, pulmonary valve, closed heart; via pulmonary artery                                                                                                                                                                                                                    | Pulmonary valve repair/replacement - open                                             |
| 33470     | Valvotomy, pulmonary valve, closed heart; transventricular                                                                                                                                                                                                                        | Pulmonary valve repair/replacement - open                                             |
| 50405     | Pyeloplasty (Foley Y-pyeloplasty), plastic operation on renal pelvis, with or without plastic operation on ureter, nephropexy, nephrostomy, pyelostomy, or ureteral splinting; complicated (congenital kidney abnormality, secondary pyeloplasty, solitary kidney, calycooplasty) | Pyeloplasty                                                                           |
| 50400     | Pyeloplasty (Foley Y-pyeloplasty), plastic operation on renal pelvis, with or without plastic operation on ureter, nephropexy, nephrostomy, pyelostomy, or ureteral splinting; simple                                                                                             | Pyeloplasty                                                                           |
| 50135     | Pyelotomy; complicated (eg, secondary operation, congenital kidney abnormality)                                                                                                                                                                                                   | Pyelotomy                                                                             |
| 50130     | Pyelotomy; with removal of calculus (pyelolithotomy, pelviolithotomy, including coagulum pyelolithotomy)                                                                                                                                                                          | Pyelotomy                                                                             |
| 50125     | Pyelotomy; with drainage, pyelostomy                                                                                                                                                                                                                                              | Pyelotomy                                                                             |
| 50120     | Pyelotomy; with exploration                                                                                                                                                                                                                                                       | Pyelotomy                                                                             |
| 43520     | Pyloromyotomy, cutting of pyloric muscle (Fredet-Ramstedt type operation)                                                                                                                                                                                                         | Pyloromyotomy, cutting of pyloric muscle (Fredet-Ramstedt type operation)             |
| 43800     | Pyloroplasty                                                                                                                                                                                                                                                                      | Pyloroplasty                                                                          |
| 27430     | Quadricepsplasty (eg, Bennett or Thompson type)                                                                                                                                                                                                                                   | Quadricepsplasty (eg, Bennett or Thompson type)                                       |
| 65771     | Radial keratotomy                                                                                                                                                                                                                                                                 | Radial keratotomy                                                                     |
| 25230     | Radial styloidectomy (separate procedure)                                                                                                                                                                                                                                         | Radial styloidectomy                                                                  |
| 25116     | Radical excision of bursa, synovia of wrist, or forearm tendon sheaths (eg, tenosynovitis, fungus, Tbc, or other granulomas, rheumatoid arthritis); extensors, with or without transposition of dorsal retinaculum                                                                | Radical excision of bursa, synovia of wrist, or forearm                               |
| 25115     | Radical excision of bursa, synovia of wrist, or forearm tendon sheaths (eg, tenosynovitis, fungus, Tbc, or other granulomas, rheumatoid arthritis); flexors                                                                                                                       | Radical excision of bursa, synovia of wrist, or forearm                               |
| 69155     | Radical excision external auditory canal lesion; with neck dissection                                                                                                                                                                                                             | Radical excision of external auditory canal lesion                                    |

| Continued |                                                                                                                                                                                                                                                                                                                                                                         |                                                                                                  |
|-----------|-------------------------------------------------------------------------------------------------------------------------------------------------------------------------------------------------------------------------------------------------------------------------------------------------------------------------------------------------------------------------|--------------------------------------------------------------------------------------------------|
| Code      | Code description                                                                                                                                                                                                                                                                                                                                                        | Procedure type                                                                                   |
| 69150     | Radical excision external auditory canal lesion; without neck dissection                                                                                                                                                                                                                                                                                                | Radical excision of external auditory canal lesion                                               |
| 24149     | Radical resection of capsule, soft tissue, and heterotopic bone, elbow, with contracture release (separate procedure)                                                                                                                                                                                                                                                   | Radical resection of capsule, soft tissue, and heterotopic bone, elbow, with contracture release |
| 42845     | Radical resection of tonsil, tonsillar pillars, and/or retromolar trigone; closure with other flap                                                                                                                                                                                                                                                                      | Radical resection of tonsil, tonsillar pillars, and/or retromolar trigone                        |
| 42844     | Radical resection of tonsil, tonsillar pillars, and/or retromolar trigone; closure with local flap (eg, tongue, buccal)                                                                                                                                                                                                                                                 | Radical resection of tonsil, tonsillar pillars, and/or retromolar trigone                        |
| 42842     | Radical resection of tonsil, tonsillar pillars, and/or retromolar trigone; without closure                                                                                                                                                                                                                                                                              | Radical resection of tonsil, tonsillar pillars, and/or retromolar trigone                        |
| 27646     | Radical resection of tumor; fibula                                                                                                                                                                                                                                                                                                                                      | Radical resection of tumor, bone                                                                 |
| 27647     | Radical resection of tumor; talus or calcaneus                                                                                                                                                                                                                                                                                                                          | Radical resection of tumor, bone                                                                 |
| 27645     | Radical resection of tumor; tibia                                                                                                                                                                                                                                                                                                                                       | Radical resection of tumor, bone                                                                 |
| 22905     | Radical resection of tumor (eg, sarcoma), soft tissue of abdominal wall; 5 cm or greater                                                                                                                                                                                                                                                                                | Radical resection of tumor, soft tissue                                                          |
| 22904     | Radical resection of tumor (eg, sarcoma), soft tissue of abdominal wall; less than 5 cm                                                                                                                                                                                                                                                                                 | Radical resection of tumor, soft tissue                                                          |
| 21936     | Radical resection of tumor (eg, sarcoma), soft tissue of back or flank; 5 cm or greater                                                                                                                                                                                                                                                                                 | Radical resection of tumor, soft tissue                                                          |
| 21935     | Radical resection of tumor (eg, sarcoma), soft tissue of back or flank; less than 5 cm                                                                                                                                                                                                                                                                                  | Radical resection of tumor, soft tissue                                                          |
| 21016     | Radical resection of tumor (eg, sarcoma), soft tissue of face or scalp; 2 cm or greater                                                                                                                                                                                                                                                                                 | Radical resection of tumor, soft tissue                                                          |
| 21015     | Radical resection of tumor (eg, sarcoma), soft tissue of face or scalp; less than 2 cm                                                                                                                                                                                                                                                                                  | Radical resection of tumor, soft tissue                                                          |
| 28175     | Radical resection of tumor; phalanx of toe                                                                                                                                                                                                                                                                                                                              | Radical resection of tumor, soft tissue                                                          |
| 28173     | Radical resection of tumor; metatarsal                                                                                                                                                                                                                                                                                                                                  | Radical resection of tumor, soft tissue                                                          |
| 28171     | Radical resection of tumor; tarsal (except talus or calcaneus)                                                                                                                                                                                                                                                                                                          | Radical resection of tumor, soft tissue                                                          |
| 27616     | Radical resection of tumor (eg, sarcoma), soft tissue of leg or ankle area; 5 cm or greater                                                                                                                                                                                                                                                                             | Radical resection of tumor, soft tissue                                                          |
| 27615     | Radical resection of tumor (eg, sarcoma), soft tissue of leg or ankle area; less than 5 cm                                                                                                                                                                                                                                                                              | Radical resection of tumor, soft tissue                                                          |
| 27365     | Radical resection of tumor, femur or knee                                                                                                                                                                                                                                                                                                                               | Radical resection of tumor, soft tissue                                                          |
| 27364     | Radical resection of tumor (eg, sarcoma), soft tissue of thigh or knee area; 5 cm or greater                                                                                                                                                                                                                                                                            | Radical resection of tumor, soft tissue                                                          |
| 27329     | Radical resection of tumor (eg, sarcoma), soft tissue of thigh or knee area; less than 5 cm                                                                                                                                                                                                                                                                             | Radical resection of tumor, soft tissue                                                          |
| 21558     | Radical resection of tumor (eg, sarcoma), soft tissue of neck or anterior thorax; 5 cm or greater                                                                                                                                                                                                                                                                       | Radical resection of tumor, soft tissue                                                          |
| 21557     | Radical resection of tumor (eg, sarcoma), soft tissue of neck or anterior thorax; less than 5 cm                                                                                                                                                                                                                                                                        | Radical resection of tumor, soft tissue                                                          |
| 27059     | Radical resection of tumor (eg, sarcoma), soft tissue of pelvis and hip area; 5 cm or greater                                                                                                                                                                                                                                                                           | Radical resection of tumor, soft tissue                                                          |
| 27049     | Radical resection of tumor (eg, sarcoma), soft tissue of pelvis and hip area; less than 5 cm                                                                                                                                                                                                                                                                            | Radical resection of tumor, soft tissue                                                          |
| 23078     | Radical resection of tumor (eg, sarcoma), soft tissue of shoulder area; 5 cm or greater                                                                                                                                                                                                                                                                                 | Radical resection of tumor, soft tissue                                                          |
| 23077     | Radical resection of tumor (eg, sarcoma), soft tissue of shoulder area; less than 5 cm                                                                                                                                                                                                                                                                                  | Radical resection of tumor, soft tissue                                                          |
| 28047     | Radical resection of tumor (eg, sarcoma), soft tissue of foot or toe; 3 cm or greater                                                                                                                                                                                                                                                                                   | Radical resection of tumor, soft tissue                                                          |
| 28046     | Radical resection of tumor (eg, sarcoma), soft tissue of foot or toe; less than 3 cm                                                                                                                                                                                                                                                                                    | Radical resection of tumor, soft tissue                                                          |
| 26118     | Radical resection of tumor (eg, sarcoma), soft tissue of hand or finger; 3 cm or greater                                                                                                                                                                                                                                                                                | Radical resection of tumor, soft tissue                                                          |
| 26117     | Radical resection of tumor (eg, sarcoma), soft tissue of hand or finger; less than 3 cm                                                                                                                                                                                                                                                                                 | Radical resection of tumor, soft tissue                                                          |
| 25078     | Radical resection of tumor (eg, sarcoma), soft tissue of forearm and/or wrist area; 3 cm or greater                                                                                                                                                                                                                                                                     | Radical resection of tumor, soft tissue                                                          |
| 25077     | Radical resection of tumor (eg, sarcoma), soft tissue of forearm and/or wrist area; less than 3 cm                                                                                                                                                                                                                                                                      | Radical resection of tumor, soft tissue                                                          |
| 24079     | Radical resection of tumor (eg, sarcoma), soft tissue of upper arm or elbow area; 5 cm or greater                                                                                                                                                                                                                                                                       | Radical resection of tumor, soft tissue                                                          |
| 24077     | Radical resection of tumor (eg, sarcoma), soft tissue of upper arm or elbow area; less than 5 cm                                                                                                                                                                                                                                                                        | Radical resection of tumor, soft tissue                                                          |
| 26590     | Repair macrodactylia, each digit                                                                                                                                                                                                                                                                                                                                        | Reconstruction of hand, congenital macrodactyly                                                  |
| 33622     | Reconstruction of complex cardiac anomaly (eg, single ventricle or hypoplastic left heart) with palliation of single ventricle with aortic outflow obstruction and aortic arch hypoplasia, creation of cavopulmonary anastomosis, and removal of right and left pulmonary bands (eg, hybrid approach stage 2, Norwood, bidirectional Glenn, pulmonary artery debanding) | Reconstruction of complex cardiac anomaly (eg, single ventricle or hypoplastic left heart)       |
| 27424     | Reconstruction of dislocating patella; with patellectomy                                                                                                                                                                                                                                                                                                                | Reconstruction of dislocating patella                                                            |

| Continued |                                                                                                                                                  |                                                         |
|-----------|--------------------------------------------------------------------------------------------------------------------------------------------------|---------------------------------------------------------|
| Code      | Code description                                                                                                                                 | Procedure type                                          |
| 27422     | Reconstruction of dislocating patella; with extensor realignment and/or muscle advancement or release (eg, Campbell, Goldwaite type procedure)   | Reconstruction of dislocating patella                   |
| 27420     | Reconstruction of dislocating patella; (eg, Hauser type procedure)                                                                               | Reconstruction of dislocating patella                   |
| 69320     | Reconstruction external auditory canal for congenital atresia, single stage                                                                      | Reconstruction of external auditory canal               |
| 69310     | Reconstruction of external auditory canal (meatoplasty) (eg, for stenosis due to injury, infection) (separate procedure)                         | Reconstruction of external auditory canal               |
| 67975     | Reconstruction of eyelid, full thickness by transfer of tarsoconjunctival flap from opposing eyelid; second stage                                | Reconstruction of eyelid                                |
| 67974     | Reconstruction of eyelid, full thickness by transfer of tarsoconjunctival flap from opposing eyelid; total eyelid, upper, 1 stage or first stage | Reconstruction of eyelid                                |
| 67973     | Reconstruction of eyelid, full thickness by transfer of tarsoconjunctival flap from opposing eyelid; total eyelid, lower, 1 stage or first stage | Reconstruction of eyelid                                |
| 67971     | Reconstruction of eyelid, full thickness by transfer of tarsoconjunctival flap from opposing eyelid; up to 2/3 of eyelid, 1 stage or first stage | Reconstruction of eyelid                                |
| 27472     | Repair, nonunion or malunion, femur, distal to head and neck; with iliac or other autogenous bone graft (includes obtaining graft)               | Reconstruction of nonunion or malunion, lower extremity |
| 27470     | Repair, nonunion or malunion, femur, distal to head and neck; without graft (eg, compression technique)                                          | Reconstruction of nonunion or malunion, lower extremity |
| 27726     | Repair of fibula nonunion and/or malunion with internal fixation                                                                                 | Reconstruction of nonunion or malunion, lower extremity |
| 27725     | Repair of nonunion or malunion, tibia; by synostosis, with fibula, any method                                                                    | Reconstruction of nonunion or malunion, lower extremity |
| 27724     | Repair of nonunion or malunion, tibia; with iliac or other autograft (includes obtaining graft)                                                  | Reconstruction of nonunion or malunion, lower extremity |
| 27722     | Repair of nonunion or malunion, tibia; with sliding graft                                                                                        | Reconstruction of nonunion or malunion, lower extremity |
| 27720     | Repair of nonunion or malunion, tibia; without graft, (eg, compression technique)                                                                | Reconstruction of nonunion or malunion, lower extremity |
| 26546     | Repair non-union, metacarpal or phalanx (includes obtaining bone graft with or without external or internal fixation)                            | Reconstruction of nonunion or malunion, upper extremity |
| 24435     | Repair of nonunion or malunion, humerus; with iliac or other autograft (includes obtaining graft)                                                | Reconstruction of nonunion or malunion, upper extremity |
| 24430     | Repair of nonunion or malunion, humerus; without graft (eg, compression technique)                                                               | Reconstruction of nonunion or malunion, upper extremity |
| 25420     | Repair of nonunion or malunion, radius AND ulna; with autograft (includes obtaining graft)                                                       | Reconstruction of nonunion or malunion, upper extremity |
| 25415     | Repair of nonunion or malunion, radius AND ulna; without graft (eg, compression technique)                                                       | Reconstruction of nonunion or malunion, upper extremity |
| 25405     | Repair of nonunion or malunion, radius OR ulna; with autograft (includes obtaining graft)                                                        | Reconstruction of nonunion or malunion, upper extremity |
| 25400     | Repair of nonunion or malunion, radius OR ulna; without graft (eg, compression technique)                                                        | Reconstruction of nonunion or malunion, upper extremity |
| 25440     | Repair of nonunion, scaphoid carpal (navicular) bone, with or without radial styloidectomy (includes obtaining graft and necessary fixation)     | Reconstruction of nonunion or malunion, upper extremity |
| 25431     | Repair of nonunion of carpal bone (excluding carpal scaphoid (navicular)) (includes obtaining graft and necessary fixation), each bone           | Reconstruction of nonunion or malunion, upper extremity |
| 26502     | Reconstruction of tendon pulley, each tendon; with tendon or fascial graft (includes obtaining graft) (separate procedure)                       | Reconstruction of tendon pulley; finger                 |
| 26500     | Reconstruction of tendon pulley, each tendon; with local tissues (separate procedure)                                                            | Reconstruction of tendon pulley; finger                 |
| 34502     | Reconstruction of vena cava, any method                                                                                                          | Reconstruction of vena cava, any method                 |
| 28360     | Reconstruction, cleft foot                                                                                                                       | Reconstruction of cleft foot                            |
| 26587     | Reconstruction of polydactylous digit, soft tissue and bone                                                                                      | Reconstruction of congenital hand polydactyly           |
| 39545     | Imbrication of diaphragm for eventration, transthoracic or transabdominal, paralytic or nonparalytic                                             | Reconstruction of diaphragm                             |
| 21255     | Reconstruction of zygomatic arch and glenoid fossa with bone and cartilage (includes obtaining autografts)                                       | Reconstruction of face                                  |

| Continued |                                                                                                                                                                                                                                                                                                         |                             |
|-----------|---------------------------------------------------------------------------------------------------------------------------------------------------------------------------------------------------------------------------------------------------------------------------------------------------------|-----------------------------|
| Code      | Code description                                                                                                                                                                                                                                                                                        | Procedure type              |
| 21188     | Reconstruction midface, osteotomies (other than LeFort type) and bone grafts (includes obtaining autografts)                                                                                                                                                                                            | Reconstruction of face      |
| 21184     | Reconstruction of orbital walls, rims, forehead, nasoethmoid complex following intra- and extracranial excision of benign tumor of cranial bone (eg, fibrous dysplasia), with multiple autografts (includes obtaining grafts); total area of bone grafting greater than 80 sq cm                        | Reconstruction of face      |
| 21182     | Reconstruction of orbital walls, rims, forehead, nasoethmoid complex following intra- and extracranial excision of benign tumor of cranial bone (eg, fibrous dysplasia), with multiple autografts (includes obtaining grafts); total area of bone grafting less than 40 sq cm                           | Reconstruction of face      |
| 21181     | Reconstruction by contouring of benign tumor of cranial bones (eg, fibrous dysplasia), extracranial                                                                                                                                                                                                     | Reconstruction of face      |
| 21180     | Reconstruction, entire or majority of forehead and/or supraorbital rims; with autograft (includes obtaining grafts)                                                                                                                                                                                     | Reconstruction of face      |
| 21179     | Reconstruction, entire or majority of forehead and/or supraorbital rims; with grafts (allograft or prosthetic material)                                                                                                                                                                                 | Reconstruction of face      |
| 21175     | Reconstruction, bifrontal, superior-lateral orbital rims and lower forehead, advancement or alteration (eg, plagiocephaly, trigonocephaly, brachycephaly), with or without grafts (includes obtaining autografts)                                                                                       | Reconstruction of face      |
| 21172     | Reconstruction superior-lateral orbital rim and lower forehead, advancement or alteration, with or without grafts (includes obtaining autografts)                                                                                                                                                       | Reconstruction of face      |
| 21160     | Reconstruction midface, LeFort III (extra and intracranial) with forehead advancement (eg, mono bloc), requiring bone grafts (includes obtaining autografts); with LeFort I                                                                                                                             | Reconstruction of face      |
| 21183     | Reconstruction of orbital walls, rims, forehead, nasoethmoid complex following intra- and extracranial excision of benign tumor of cranial bone (eg, fibrous dysplasia), with multiple autografts (includes obtaining grafts); total area of bone grafting greater than 40 sq cm but less than 80 sq cm | Reconstruction of face      |
| 21159     | Reconstruction midface, LeFort III (extra and intracranial) with forehead advancement (eg, mono bloc), requiring bone grafts (includes obtaining autografts); without LeFort I                                                                                                                          | Reconstruction of face      |
| 21155     | Reconstruction midface, LeFort III (extracranial), any type, requiring bone grafts (includes obtaining autografts); with LeFort I                                                                                                                                                                       | Reconstruction of face      |
| 21256     | Reconstruction of orbit with osteotomies (extracranial) and with bone grafts (includes obtaining autografts) (eg, micro-ophthalmia)                                                                                                                                                                     | Reconstruction of face      |
| 21154     | Reconstruction midface, LeFort III (extracranial), any type, requiring bone grafts (includes obtaining autografts); without LeFort I                                                                                                                                                                    | Reconstruction of face      |
| 21151     | Reconstruction midface, LeFort II; any direction, requiring bone grafts (includes obtaining autografts)                                                                                                                                                                                                 | Reconstruction of face      |
| 21150     | Reconstruction midface, LeFort II; anterior intrusion (eg, Treacher-Collins Syndrome)                                                                                                                                                                                                                   | Reconstruction of face      |
| 21147     | Reconstruction midface, LeFort I; 3 or more pieces, segment movement in any direction, requiring bone grafts (includes obtaining autografts) (eg, ungrafted bilateral alveolar cleft or multiple osteotomies)                                                                                           | Reconstruction of face      |
| 21146     | Reconstruction midface, LeFort I; 2 pieces, segment movement in any direction, requiring bone grafts (includes obtaining autografts) (eg, ungrafted unilateral alveolar cleft)                                                                                                                          | Reconstruction of face      |
| 21145     | Reconstruction midface, LeFort I; single piece, segment movement in any direction, requiring bone grafts (includes obtaining autografts)                                                                                                                                                                | Reconstruction of face      |
| 21143     | Reconstruction midface, LeFort I; 3 or more pieces, segment movement in any direction, without bone graft                                                                                                                                                                                               | Reconstruction of face      |
| 21142     | Reconstruction midface, LeFort I; 2 pieces, segment movement in any direction, without bone graft                                                                                                                                                                                                       | Reconstruction of face      |
| 21141     | Reconstruction midface, LeFort I; single piece, segment movement in any direction (eg, for Long Face Syndrome), without bone graft                                                                                                                                                                      | Reconstruction of face      |
| 21139     | Reduction forehead; contouring and setback of anterior frontal sinus wall                                                                                                                                                                                                                               | Reconstruction of face      |
| 21138     | Reduction forehead; contouring and application of prosthetic material or bone graft (includes obtaining autograft)                                                                                                                                                                                      | Reconstruction of face      |
| 21137     | Reduction forehead; contouring only                                                                                                                                                                                                                                                                     | Reconstruction of face      |
| 11762     | Reconstruction of nail bed with graft                                                                                                                                                                                                                                                                   | Reconstruction of fingertip |
| 28446     | Open osteochondral autograft, talus (includes obtaining graft[s])                                                                                                                                                                                                                                       | Reconstruction of foot      |
| 28286     | Correction, cock-up fifth toe, with plastic skin closure (eg, Ruiz-Mora type procedure)                                                                                                                                                                                                                 | Reconstruction of foot      |
| 28238     | Reconstruction (advancement), posterior tibial tendon with excision of accessory tarsal navicular bone (eg, Kidner type procedure)                                                                                                                                                                      | Reconstruction of foot      |

| Continued |                                                                                                                                                                                                                                                  |                                                                                            |
|-----------|--------------------------------------------------------------------------------------------------------------------------------------------------------------------------------------------------------------------------------------------------|--------------------------------------------------------------------------------------------|
| Code      | Code description                                                                                                                                                                                                                                 | Procedure type                                                                             |
| 26508     | Release of thenar muscle(s) (eg, thumb contracture)                                                                                                                                                                                              | Reconstruction of hand contracture release                                                 |
| 26548     | Repair and reconstruction, finger, volar plate, interphalangeal joint                                                                                                                                                                            | Reconstruction of hand interphalangeal joint                                               |
| 21196     | Reconstruction of mandibular rami and/or body, sagittal split; with internal rigid fixation                                                                                                                                                      | Reconstruction of mandible or maxilla                                                      |
| 21195     | Reconstruction of mandibular rami and/or body, sagittal split; without internal rigid fixation                                                                                                                                                   | Reconstruction of mandible or maxilla                                                      |
| 21194     | Reconstruction of mandibular rami, horizontal, vertical, C, or L osteotomy; with bone graft (includes obtaining graft)                                                                                                                           | Reconstruction of mandible or maxilla                                                      |
| 21193     | Reconstruction of mandibular rami, horizontal, vertical, C, or L osteotomy; without bone graft                                                                                                                                                   | Reconstruction of mandible or maxilla                                                      |
| 21249     | Reconstruction of mandible or maxilla, endosteal implant (eg, blade, cylinder); complete                                                                                                                                                         | Reconstruction of mandible or maxilla                                                      |
| 21248     | Reconstruction of mandible or maxilla, endosteal implant (eg, blade, cylinder); partial                                                                                                                                                          | Reconstruction of mandible or maxilla                                                      |
| 21247     | Reconstruction of mandibular condyle with bone and cartilage autografts (includes obtaining grafts) (eg, for hemifacial microsomia)                                                                                                              | Reconstruction of mandible or maxilla                                                      |
| 21246     | Reconstruction of mandible or maxilla, subperiosteal implant; complete                                                                                                                                                                           | Reconstruction of mandible or maxilla                                                      |
| 21245     | Reconstruction of mandible or maxilla, subperiosteal implant; partial                                                                                                                                                                            | Reconstruction of mandible or maxilla                                                      |
| 21244     | Reconstruction of mandible, extraoral, with transosteal bone plate (eg, mandibular staple bone plate)                                                                                                                                            | Reconstruction of mandible or maxilla                                                      |
| 47800     | Reconstruction, plastic, of extrahepatic biliary ducts with end-to-end anastomosis                                                                                                                                                               | Reconstruction of extrahepatic biliary ducts with end-to-end anastomosis                   |
| 23420     | Reconstruction of complete shoulder (rotator cuff avulsion, chronic (includes acromioplasty)                                                                                                                                                     | Reconstruction of shoulder                                                                 |
| 28313     | Reconstruction, angular deformity of toe, soft tissue procedures only (eg, overlapping second toe, fifth toe, curly toes)                                                                                                                        | Reconstruction of toe                                                                      |
| 28344     | Reconstruction, toe(s); polydactyly                                                                                                                                                                                                              | Reconstruction of toe                                                                      |
| 28341     | Reconstruction, toe, macrodactyly; requiring bone resection                                                                                                                                                                                      | Reconstruction of toe                                                                      |
| 28340     | Reconstruction, toe, macrodactyly; soft tissue resection                                                                                                                                                                                         | Reconstruction of toe                                                                      |
| 28345     | Reconstruction, toe(s); syndactyly, with or without skin graft(s), each web                                                                                                                                                                      | Reconstruction of toe                                                                      |
| 25337     | Reconstruction for stabilization of unstable distal ulna or distal radioulnar joint, secondary by soft tissue stabilization (eg, tendon transfer, tendon graft or weave, or tenodesis) with or without open reduction of distal radioulnar joint | Reconstruction of wrist                                                                    |
| 21743     | Reconstructive repair of pectus excavatum or carinatum; minimally invasive approach (Nuss procedure), with thoracoscopy                                                                                                                          | Reconstructive repair of pectus excavatum or carinatum                                     |
| 21742     | Reconstructive repair of pectus excavatum or carinatum; minimally invasive approach (Nuss procedure), without thoracoscopy                                                                                                                       | Reconstructive repair of pectus excavatum or carinatum                                     |
| 21740     | Reconstructive repair of pectus excavatum or carinatum; open                                                                                                                                                                                     | Reconstructive repair of pectus excavatum or carinatum                                     |
| 21296     | Reduction of masseter muscle and bone (eg, for treatment of benign masseteric hypertrophy); intraoral approach                                                                                                                                   | Reduction of masseter muscle and bone                                                      |
| 21295     | Reduction of masseter muscle and bone (eg, for treatment of benign masseteric hypertrophy); extraoral approach                                                                                                                                   | Reduction of masseter muscle and bone                                                      |
| 54600     | Reduction of torsion of testis, surgical, with or without fixation of contralateral testis                                                                                                                                                       | Reduction of torsion of testis                                                             |
| 49014     | Re-exploration of pelvic wound with removal of preperitoneal pelvic packing, including repacking, when performed                                                                                                                                 | Re-exploration of pelvic wound with removal of preperitoneal pelvic packing                |
| 33788     | Reimplantation of an anomalous pulmonary artery                                                                                                                                                                                                  | Reimplantation of an anomalous pulmonary artery                                            |
| 65155     | Reinsertion of ocular implant; with use of foreign material for reinforcement and/or attachment of muscles to implant                                                                                                                            | Reinsertion of ocular implant                                                              |
| 65150     | Reinsertion of ocular implant; with or without conjunctival graft                                                                                                                                                                                | Reinsertion of ocular implant                                                              |
| 22849     | Reinsertion of spinal fixation device                                                                                                                                                                                                            | Reinsertion of spinal fixation device                                                      |
| 67115     | Release of encircling material (posterior segment)                                                                                                                                                                                               | Release of encircling material, posterior segment                                          |
| 67343     | Release of extensive scar tissue without detaching extraocular muscle (separate procedure)                                                                                                                                                       | Release of extensive scar tissue without detaching extraocular muscle (separate procedure) |
| 27097     | Release or recession, hamstring, proximal                                                                                                                                                                                                        | Release or recession, hamstring, proximal                                                  |
| 26593     | Release, intrinsic muscles of hand, each muscle                                                                                                                                                                                                  | Release of intrinsic muscles of hand                                                       |
| 26416     | Removal of synthetic rod and insertion of extensor tendon graft (includes obtaining graft), hand or finger, each rod                                                                                                                             | Removal of synthetic rod and insertion of tendon graft in hand or finger                   |

| Continued |                                                                                                                                                                                                                           |                                                                                                                                 |
|-----------|---------------------------------------------------------------------------------------------------------------------------------------------------------------------------------------------------------------------------|---------------------------------------------------------------------------------------------------------------------------------|
| Code      | Code description                                                                                                                                                                                                          | Procedure type                                                                                                                  |
| 26392     | Removal of synthetic rod and insertion of flexor tendon graft, hand or finger (includes obtaining graft), each rod                                                                                                        | Removal of synthetic rod and insertion of tendon graft in hand or finger                                                        |
| 53448     | Removal and replacement of inflatable urethral/bladder neck sphincter including pump, reservoir, and cuff through an infected field at the same operative session including irrigation and debridement of infected tissue | Removal and/or replacement of inflatable urethral/bladder neck sphincter                                                        |
| 53447     | Removal and replacement of inflatable urethral/bladder neck sphincter including pump, reservoir, and cuff at the same operative session                                                                                   | Removal and/or replacement of inflatable urethral/bladder neck sphincter                                                        |
| 53446     | Removal of inflatable urethral/bladder neck sphincter, including pump, reservoir, and cuff                                                                                                                                | Removal and/or replacement of inflatable urethral/bladder neck sphincter                                                        |
| 27704     | Removal of ankle implant                                                                                                                                                                                                  | Removal of ankle implant                                                                                                        |
| 65930     | Removal of blood clot, anterior segment of eye                                                                                                                                                                            | Removal of blood clot, anterior segment of eye                                                                                  |
| 63746     | Removal of entire lumbosubarachnoid shunt system without replacement                                                                                                                                                      | Removal of entire lumbosubarachnoid shunt system without replacement                                                            |
| 65900     | Removal of epithelial downgrowth, anterior chamber of eye                                                                                                                                                                 | Removal of epithelial downgrowth, anterior chamber of eye                                                                       |
| 43285     | Removal of esophageal sphincter augmentation device                                                                                                                                                                       | Removal of esophageal sphincter augmentation device                                                                             |
| 54115     | Removal foreign body from deep penile tissue (eg, plastic implant)                                                                                                                                                        | Removal of foreign body from deep penile tissue (eg, plastic implant)                                                           |
| 65265     | Removal of foreign body, intraocular; from posterior segment, nonmagnetic extraction                                                                                                                                      | Removal of foreign body, intraocular                                                                                            |
| 65260     | Removal of foreign body, intraocular; from posterior segment, magnetic extraction, anterior or posterior route                                                                                                            | Removal of foreign body, intraocular                                                                                            |
| 65235     | Removal of foreign body, intraocular; from anterior chamber of eye or lens                                                                                                                                                | Removal of foreign body, intraocular                                                                                            |
| 23333     | Removal of foreign body, shoulder; deep (subfascial or intramuscular)                                                                                                                                                     | Removal of foreign body, shoulder                                                                                               |
| 23332     | Removal of foreign body, shoulder; complicated (eg, total shoulder)                                                                                                                                                       | Removal of foreign body, shoulder                                                                                               |
| 23331     | Removal of foreign body, shoulder; deep (eg, Neer hemiarthroplasty removal)                                                                                                                                               | Removal of foreign body, shoulder                                                                                               |
| 27091     | Removal of hip prosthesis; complicated, including total hip prosthesis, methylmethacrylate with or without insertion of spacer                                                                                            | Removal of hip prosthesis                                                                                                       |
| 27090     | Removal of hip prosthesis; (separate procedure)                                                                                                                                                                           | Removal of hip prosthesis                                                                                                       |
| 64584     | Removal of hypoglossal nerve neurostimulator array, pulse generator, and distal respiratory sensor electrode or electrode array                                                                                           | Removal of hypoglossal nerve neurostimulator array, pulse generator, and distal respiratory sensor electrode or electrode array |
| 26320     | Removal of implant from finger or hand                                                                                                                                                                                    | Removal of implant from finger or hand                                                                                          |
| 20680     | Removal of implant; deep (eg, buried wire, pin, screw, metal band, nail, rod or plate)                                                                                                                                    | Removal of implant; deep (eg, buried wire, pin, screw, metal band, nail, rod or plate)                                          |
| 20670     | Removal of implant; superficial (eg, buried wire, pin or rod) (separate procedure)                                                                                                                                        | Removal of implant; superficial (eg, buried wire, pin or rod)                                                                   |
| 33264     | Removal of pacing cardioverter-defibrillator pulse generator with replacement of pacing cardioverter-defibrillator pulse generator; multiple lead system                                                                  | Removal of implantable defibrillator pulse generator with replacement of implantable defibrillator pulse generator              |
| 33263     | Removal of pacing cardioverter-defibrillator pulse generator with replacement of pacing cardioverter-defibrillator pulse generator; dual lead system                                                                      | Removal of implantable defibrillator pulse generator with replacement of implantable defibrillator pulse generator              |
| 33262     | Removal of pacing cardioverter-defibrillator pulse generator with replacement of pacing cardioverter-defibrillator pulse generator; single lead system                                                                    | Removal of implantable defibrillator pulse generator with replacement of implantable defibrillator pulse generator              |
| 65920     | Removal of implanted material, anterior segment of eye                                                                                                                                                                    | Removal of implanted material, eye                                                                                              |
| 67121     | Removal of implanted material, posterior segment; intraocular                                                                                                                                                             | Removal of implanted material, eye                                                                                              |
| 67120     | Removal of implanted material, posterior segment; extraocular                                                                                                                                                             | Removal of implanted material, eye                                                                                              |
| 22855     | Removal of anterior instrumentation                                                                                                                                                                                       | Removal of instrumentation in spine                                                                                             |
| 22852     | Removal of posterior segmental instrumentation                                                                                                                                                                            | Removal of instrumentation in spine                                                                                             |
| 22850     | Removal of posterior nonsegmental instrumentation (eg, Harrington rod)                                                                                                                                                    | Removal of instrumentation in spine                                                                                             |
| 44137     | Removal of transplanted intestinal allograft, complete                                                                                                                                                                    | Removal of intestinal transplant                                                                                                |
| 66940     | Removal of lens material; extracapsular (other than 66840, 66850, 66852)                                                                                                                                                  | Removal of lens material                                                                                                        |

| Continued |                                                                                                                                        |                                                                                                      |
|-----------|----------------------------------------------------------------------------------------------------------------------------------------|------------------------------------------------------------------------------------------------------|
| Code      | Code description                                                                                                                       | Procedure type                                                                                       |
| 66930     | Removal of lens material; intracapsular, for dislocated lens                                                                           | Removal of lens material                                                                             |
| 66920     | Removal of lens material; intracapsular                                                                                                | Removal of lens material                                                                             |
| 66852     | Removal of lens material; pars plana approach, with or without vitrectomy                                                              | Removal of lens material                                                                             |
| 66850     | Removal of lens material; phacofragmentation technique (mechanical or ultrasonic) (eg, phacoemulsification), with aspiration           | Removal of lens material                                                                             |
| 66840     | Removal of lens material; aspiration technique, 1 or more stages                                                                       | Removal of lens material                                                                             |
| 19330     | Removal of mammary implant material                                                                                                    | Removal of mammary implant                                                                           |
| 19328     | Removal of intact mammary implant                                                                                                      | Removal of mammary implant                                                                           |
| 65175     | Removal of ocular implant                                                                                                              | Removal of ocular implant                                                                            |
| 48020     | Removal of pancreatic calculus                                                                                                         | Removal of pancreatic calculus                                                                       |
| 48556     | Removal of transplanted pancreatic allograft                                                                                           | Removal of pancreatic transplant                                                                     |
| 49402     | Removal of peritoneal foreign body from peritoneal cavity                                                                              | Removal of peritoneal foreign body from peritoneal cavity                                            |
| 27488     | Removal of prosthesis, including total knee prosthesis, methylmethacrylate with or without insertion of spacer, knee                   | Removal of prosthesis, knee                                                                          |
| 23335     | Removal of prosthesis, includes debridement and synovectomy when performed; humeral and glenoid components (eg, total shoulder)        | Removal of prosthesis, shoulder                                                                      |
| 23334     | Removal of prosthesis, includes debridement and synovectomy when performed; humeral or glenoid component                               | Removal of prosthesis, shoulder                                                                      |
| 24164     | Removal of prosthesis, includes debridement and synovectomy when performed; radial head                                                | Removal of prosthesis, upper extremity                                                               |
| 24160     | Removal of prosthesis, includes debridement and synovectomy when performed; humeral and ulnar components                               | Removal of prosthesis, upper extremity                                                               |
| 11971     | Removal of tissue expander(s) without insertion of prosthesis                                                                          | Removal of tissue expander(s) without insertion of prosthesis                                        |
| 22865     | Removal of total disc arthroplasty (artificial disc), anterior approach, single interspace; lumbar                                     | Removal of total disc arthroplasty (artificial disc), anterior approach, single interspace; cervical |
| 22864     | Removal of total disc arthroplasty (artificial disc), anterior approach, single interspace; cervical                                   | Removal of total disc arthroplasty (artificial disc), anterior approach, single interspace; cervical |
| 50370     | Removal of transplanted renal allograft                                                                                                | Removal of transplanted renal allograft                                                              |
| 69970     | Removal of tumor, temporal bone                                                                                                        | Removal of tumor, temporal bone                                                                      |
| 33980     | Removal of ventricular assist device, implantable intracorporeal, single ventricle                                                     | Removal of ventricular assist device                                                                 |
| 33978     | Removal of ventricular assist device; extracorporeal, biventricular                                                                    | Removal of ventricular assist device                                                                 |
| 33977     | Removal of ventricular assist device; extracorporeal, single ventricle                                                                 | Removal of ventricular assist device                                                                 |
| 67010     | Removal of vitreous, anterior approach (open sky technique or limbal incision); subtotal removal with mechanical vitrectomy            | Removal of vitreous, anterior approach                                                               |
| 67005     | Removal of vitreous, anterior approach (open sky technique or limbal incision); partial removal                                        | Removal of vitreous, anterior approach                                                               |
| 25251     | Removal of wrist prosthesis; complicated, including total wrist                                                                        | Removal of wrist prosthesis                                                                          |
| 25250     | Removal of wrist prosthesis; (separate procedure)                                                                                      | Removal of wrist prosthesis                                                                          |
| 69711     | Removal or repair of electromagnetic bone conduction hearing device in temporal bone                                                   | Removal or repair of electromagnetic bone conduction hearing device in temporal bone                 |
| 67560     | Orbital implant (implant outside muscle cone); removal or revision                                                                     | Removal or revision of orbital implant                                                               |
| 53442     | Removal or revision of sling for male urinary incontinence (eg, fascia or synthetic)                                                   | Removal or revision of sling for male urinary incontinence (eg, fascia or synthetic)                 |
| 57287     | Removal or revision of sling for stress incontinence (eg, fascia or synthetic)                                                         | Removal or revision of sling for stress incontinence                                                 |
| 33974     | Removal of intra-aortic balloon assist device from the ascending aorta, including repair of the ascending aorta, with or without graft | Removal of intra-aortic balloon assist device                                                        |
| 33971     | Removal of intra-aortic balloon assist device including repair of femoral artery, with or without graft                                | Removal of intra-aortic balloon assist device                                                        |
| 50010     | Renal exploration, not necessitating other specific procedures                                                                         | Renal exploration                                                                                    |
| 35286     | Repair blood vessel with graft other than vein; lower extremity                                                                        | Repair of blood vessel                                                                               |

| Continued |                                                                                                                                                                               |                                                                  |
|-----------|-------------------------------------------------------------------------------------------------------------------------------------------------------------------------------|------------------------------------------------------------------|
| Code      | Code description                                                                                                                                                              | Procedure type                                                   |
| 35281     | Repair blood vessel with graft other than vein; intra-abdominal                                                                                                               | Repair of blood vessel                                           |
| 35251     | Repair blood vessel with vein graft; intra-abdominal                                                                                                                          | Repair of blood vessel                                           |
| 35226     | Repair blood vessel, direct; lower extremity                                                                                                                                  | Repair of blood vessel                                           |
| 35221     | Repair blood vessel, direct; intra-abdominal                                                                                                                                  | Repair of blood vessel                                           |
| 35276     | Repair blood vessel with graft other than vein; intrathoracic, without bypass                                                                                                 | Repair of blood vessel                                           |
| 35271     | Repair blood vessel with graft other than vein; intrathoracic, with bypass                                                                                                    | Repair of blood vessel                                           |
| 35246     | Repair blood vessel with vein graft; intrathoracic, without bypass                                                                                                            | Repair of blood vessel                                           |
| 35241     | Repair blood vessel with vein graft; intrathoracic, with bypass                                                                                                               | Repair of blood vessel                                           |
| 35216     | Repair blood vessel, direct; intrathoracic, without bypass                                                                                                                    | Repair of blood vessel                                           |
| 35211     | Repair blood vessel, direct; intrathoracic, with bypass                                                                                                                       | Repair of blood vessel                                           |
| 35256     | Repair blood vessel with vein graft; lower extremity                                                                                                                          | Repair of blood vessel                                           |
| 35261     | Repair blood vessel with graft other than vein; neck                                                                                                                          | Repair of blood vessel                                           |
| 35231     | Repair blood vessel with vein graft; neck                                                                                                                                     | Repair of blood vessel                                           |
| 35201     | Repair blood vessel, direct; neck                                                                                                                                             | Repair of blood vessel                                           |
| 35266     | Repair blood vessel with graft other than vein; upper extremity                                                                                                               | Repair of blood vessel                                           |
| 35236     | Repair blood vessel with vein graft; upper extremity                                                                                                                          | Repair of blood vessel                                           |
| 35207     | Repair blood vessel, direct; hand, finger                                                                                                                                     | Repair of blood vessel                                           |
| 35206     | Repair blood vessel, direct; upper extremity                                                                                                                                  | Repair of blood vessel                                           |
| 30545     | Repair choanal atresia; transpalatine                                                                                                                                         | Repair of choanal atresia                                        |
| 30540     | Repair choanal atresia; intranasal                                                                                                                                            | Repair of choanal atresia                                        |
| 26580     | Repair cleft hand                                                                                                                                                             | Repair of cleft hand                                             |
| 30600     | Repair fistula; oronasal                                                                                                                                                      | Repair of fistula, oronasal or oromaxillary                      |
| 30580     | Repair fistula; oromaxillary (combine with 31030 if antrotomy is included)                                                                                                    | Repair of fistula, oronasal or oromaxillary                      |
| 32800     | Repair lung hernia through chest wall                                                                                                                                         | Repair of lung hernia through chest wall                         |
| 33507     | Repair of anomalous (eg, intramural) aortic origin of coronary artery by unroofing or translocation                                                                           | Repair of anomalous coronary artery from pulmonary artery origin |
| 33506     | Repair of anomalous coronary artery from pulmonary artery origin; by translocation from pulmonary artery to aorta                                                             | Repair of anomalous coronary artery from pulmonary artery origin |
| 33505     | Repair of anomalous coronary artery from pulmonary artery origin; with construction of intrapulmonary artery tunnel (Takeuchi procedure)                                      | Repair of anomalous coronary artery from pulmonary artery origin |
| 33504     | Repair of anomalous coronary artery from pulmonary artery origin; by graft, with cardiopulmonary bypass                                                                       | Repair of anomalous coronary artery from pulmonary artery origin |
| 33503     | Repair of anomalous coronary artery from pulmonary artery origin; by graft, without cardiopulmonary bypass                                                                    | Repair of anomalous coronary artery from pulmonary artery origin |
| 33502     | Repair of anomalous coronary artery from pulmonary artery origin; by ligation                                                                                                 | Repair of anomalous coronary artery from pulmonary artery origin |
| 33730     | Complete repair of anomalous pulmonary venous return (supracardiac, intracardiac, or infracardiac types)                                                                      | Repair of anomalous pulmonary venous return                      |
| 42235     | Repair of anterior palate, including vomer flap                                                                                                                               | Repair of anterior palate, including vomer flap                  |
| 33897     | Percutaneous transluminal angioplasty of native or recurrent coarctation of the aorta                                                                                         | Repair of aortic coarctation                                     |
| 33895     | Endovascular stent repair of coarctation of the ascending, transverse, or descending thoracic or abdominal aorta, involving stent placement; not crossing major side branches | Repair of aortic coarctation                                     |
| 33894     | Endovascular stent repair of coarctation of the ascending, transverse, or descending thoracic or abdominal aorta, involving stent placement; across major side branches       | Repair of aortic coarctation                                     |
| 33688     | Closure of single ventricular septal defect, with or without patch; with removal of pulmonary artery band, with or without gusset                                             | Repair of atrial and/or ventricular septal defects               |
| 33684     | Closure of single ventricular septal defect, with or without patch; with pulmonary valvotomy or infundibular resection (acyanotic)                                            | Repair of atrial and/or ventricular septal defects               |
| 33681     | Closure of single ventricular septal defect, with or without patch;                                                                                                           | Repair of atrial and/or ventricular septal defects               |
| 33677     | Closure of multiple ventricular septal defects; with removal of pulmonary artery band, with or without gusset                                                                 | Repair of atrial and/or ventricular septal defects               |
| 33676     | Closure of multiple ventricular septal defects; with pulmonary valvotomy or infundibular resection (acyanotic)                                                                | Repair of atrial and/or ventricular septal defects               |
| 33675     | Closure of multiple ventricular septal defects;                                                                                                                               | Repair of atrial and/or ventricular septal defects               |

| Continued |                                                                                                                                                                                          |                                                                                           |
|-----------|------------------------------------------------------------------------------------------------------------------------------------------------------------------------------------------|-------------------------------------------------------------------------------------------|
| Code      | Code description                                                                                                                                                                         | Procedure type                                                                            |
| 33660     | Repair of incomplete or partial atrioventricular canal (ostium primum atrial septal defect), with or without atrioventricular valve repair                                               | Repair of atrial and/or ventricular septal defects                                        |
| 33647     | Repair of atrial septal defect and ventricular septal defect, with direct or patch closure                                                                                               | Repair of atrial and/or ventricular septal defects                                        |
| 33641     | Repair atrial septal defect, secundum, with cardiopulmonary bypass, with or without patch                                                                                                | Repair of atrial and/or ventricular septal defects                                        |
| 33670     | Repair of complete atrioventricular canal, with or without prosthetic valve                                                                                                              | Repair of atrioventricular canal                                                          |
| 33665     | Repair of intermediate or transitional atrioventricular canal, with or without atrioventricular valve repair                                                                             | Repair of atrioventricular canal                                                          |
| 67908     | Repair of blepharoptosis; conjunctivo-tarso-Muller's muscle-levator resection (eg, Fasanella-Servat type)                                                                                | Repair of blepharoptosis                                                                  |
| 67906     | Repair of blepharoptosis; superior rectus technique with fascial sling (includes obtaining fascia)                                                                                       | Repair of blepharoptosis                                                                  |
| 67904     | Repair of blepharoptosis; (tarso) levator resection or advancement, external approach                                                                                                    | Repair of blepharoptosis                                                                  |
| 67903     | Repair of blepharoptosis; (tarso) levator resection or advancement, internal approach                                                                                                    | Repair of blepharoptosis                                                                  |
| 67902     | Repair of blepharoptosis; frontalis muscle technique with autologous fascial sling (includes obtaining fascia)                                                                           | Repair of blepharoptosis                                                                  |
| 67901     | Repair of blepharoptosis; frontalis muscle technique with suture or other material (eg, banked fascia)                                                                                   | Repair of blepharoptosis                                                                  |
| 67900     | Repair of brow ptosis (supraciliary, mid-forehead or coronal approach)                                                                                                                   | Repair of brow ptosis                                                                     |
| 33305     | Repair of cardiac wound; with cardiopulmonary bypass                                                                                                                                     | Repair of cardiac wound                                                                   |
| 33300     | Repair of cardiac wound; without bypass                                                                                                                                                  | Repair of cardiac wound                                                                   |
| 46748     | Repair of cloacal anomaly by anorectovaginoplasty and urethroplasty, combined abdominal and sacroperineal approach; with vaginal lengthening by intestinal graft or pedicle flaps        | Repair of cloacal anomaly by anorectovaginoplasty and urethroplasty                       |
| 46746     | Repair of cloacal anomaly by anorectovaginoplasty and urethroplasty, combined abdominal and sacroperineal approach;                                                                      | Repair of cloacal anomaly by anorectovaginoplasty and urethroplasty                       |
| 46744     | Repair of cloacal anomaly by anorectovaginoplasty and urethroplasty, sacroperineal approach                                                                                              | Repair of cloacal anomaly by anorectovaginoplasty and urethroplasty                       |
| 33617     | Repair of complex cardiac anomalies (eg, single ventricle) by modified Fontan procedure                                                                                                  | Repair of complex cardiac anomalies                                                       |
| 33615     | Repair of complex cardiac anomalies (eg, tricuspid atresia) by closure of atrial septal defect and anastomosis of atria or vena cava to pulmonary artery (simple Fontan procedure)       | Repair of complex cardiac anomalies                                                       |
| 33610     | Repair of complex cardiac anomalies (eg, single ventricle with subaortic obstruction) by surgical enlargement of ventricular septal defect                                               | Repair of complex cardiac anomalies                                                       |
| 33608     | Repair of complex cardiac anomaly other than pulmonary atresia with ventricular septal defect by construction or replacement of conduit from right or left ventricle to pulmonary artery | Repair of complex cardiac anomalies                                                       |
| 27727     | Repair of congenital pseudarthrosis, tibia                                                                                                                                               | Repair of congenital pseudarthrosis, tibia                                                |
| 33732     | Repair of cor triatriatum or supravulvar mitral ring by resection of left atrial membrane                                                                                                | Repair of cor triatriatum or supravulvar mitral ring by resection of left atrial membrane |
| 33501     | Repair of coronary arteriovenous or arteriocardiac chamber fistula; without cardiopulmonary bypass                                                                                       | Repair of coronary arteriovenous or arteriocardiac chamber fistula                        |
| 33500     | Repair of coronary arteriovenous or arteriocardiac chamber fistula; with cardiopulmonary bypass                                                                                          | Repair of coronary arteriovenous or arteriocardiac chamber fistula                        |
| 27698     | Repair, secondary, disrupted ligament, ankle, collateral (eg, Watson-Jones procedure)                                                                                                    | Repair of disrupted ligament, ankle                                                       |
| 27696     | Repair, primary, disrupted ligament, ankle; both collateral ligaments                                                                                                                    | Repair of disrupted ligament, ankle                                                       |
| 27695     | Repair, primary, disrupted ligament, ankle; collateral                                                                                                                                   | Repair of disrupted ligament, ankle                                                       |
| 33612     | Repair of double outlet right ventricle with intraventricular tunnel repair; with repair of right ventricular outflow tract obstruction                                                  | Repair of double outlet right ventricle with intraventricular tunnel repair               |
| 33611     | Repair of double outlet right ventricle with intraventricular tunnel repair;                                                                                                             | Repair of double outlet right ventricle with intraventricular tunnel repair               |
| 63709     | Repair of dural/cerebrospinal fluid leak or pseudomeningocele, with laminectomy                                                                                                          | Repair of dural/cerebrospinal fluid leak or pseudomeningocele, with laminectomy           |
| 63707     | Repair of dural/cerebrospinal fluid leak, not requiring laminectomy                                                                                                                      | Repair of dural/cerebrospinal fluid leak, not requiring laminectomy                       |
| 67917     | Repair of ectropion; extensive (eg, tarsal strip operations)                                                                                                                             | Repair of ectropion                                                                       |
| 67916     | Repair of ectropion; excision tarsal wedge                                                                                                                                               | Repair of ectropion                                                                       |

| Continued |                                                                                                                                                                            |                                                                                                |
|-----------|----------------------------------------------------------------------------------------------------------------------------------------------------------------------------|------------------------------------------------------------------------------------------------|
| Code      | Code description                                                                                                                                                           | Procedure type                                                                                 |
| 62120     | Repair of encephalocele, skull vault, including cranioplasty                                                                                                               | Repair of encephalocele, skull vault, including cranioplasty                                   |
| 57270     | Repair of enterocele, abdominal approach (separate procedure)                                                                                                              | Repair of enterocele                                                                           |
| 57268     | Repair of enterocele, vaginal approach (separate procedure)                                                                                                                | Repair of enterocele                                                                           |
| 67924     | Repair of entropion; extensive (eg, tarsal strip or capsulopalpebral fascia repairs operation)                                                                             | Repair of entropion                                                                            |
| 67923     | Repair of entropion; excision tarsal wedge                                                                                                                                 | Repair of entropion                                                                            |
| 67921     | Repair of entropion; suture                                                                                                                                                | Repair of entropion                                                                            |
| 43401     | Transection of esophagus with repair, for esophageal varices                                                                                                               | Repair of esophageal varices                                                                   |
| 43400     | Ligation, direct, esophageal varices                                                                                                                                       | Repair of esophageal varices                                                                   |
| 65285     | Repair of laceration; cornea and/or sclera, perforating, with reposition or resection of uveal tissue                                                                      | Repair of eye laceration                                                                       |
| 65280     | Repair of laceration; cornea and/or sclera, perforating, not involving uveal tissue                                                                                        | Repair of eye laceration                                                                       |
| 65273     | Repair of laceration; conjunctiva, by mobilization and rearrangement, with hospitalization                                                                                 | Repair of eye laceration                                                                       |
| 35870     | Repair of graft-enteric fistula                                                                                                                                            | Repair of graft-enteric fistula                                                                |
| 33853     | Repair of hypoplastic or interrupted aortic arch using autogenous or prosthetic material; with cardiopulmonary bypass                                                      | Repair of hypoplastic or interrupted aortic arch using autogenous or prosthetic material       |
| 33852     | Repair of hypoplastic or interrupted aortic arch using autogenous or prosthetic material; without cardiopulmonary bypass                                                   | Repair of hypoplastic or interrupted aortic arch using autogenous or prosthetic material       |
| 46710     | Repair of ileoanal pouch fistula/sinus (eg, perineal or vaginal), pouch advancement; transperineal approach                                                                | Repair of ileoanal pouch fistula/sinus                                                         |
| 46712     | Repair of ileoanal pouch fistula/sinus (eg, perineal or vaginal), pouch advancement; combined transperineal and transabdominal approach                                    | Repair of ileoanal pouch fistula/sinus                                                         |
| 46716     | Repair of low imperforate anus; with transposition of anoperineal or anovestibular fistula                                                                                 | Repair of imperforate anus                                                                     |
| 46715     | Repair of low imperforate anus; with anoperineal fistula (cut-back procedure)                                                                                              | Repair of imperforate anus                                                                     |
| 46742     | Repair of high imperforate anus with rectourethral or rectovaginal fistula; combined transabdominal and sacroperineal approaches                                           | Repair of imperforate anus                                                                     |
| 46735     | Repair of high imperforate anus without fistula; combined transabdominal and sacroperineal approaches                                                                      | Repair of imperforate anus                                                                     |
| 46740     | Repair of high imperforate anus with rectourethral or rectovaginal fistula; perineal or sacroperineal approach                                                             | Repair of imperforate anus                                                                     |
| 46730     | Repair of high imperforate anus without fistula; perineal or sacroperineal approach                                                                                        | Repair of imperforate anus                                                                     |
| 53449     | Repair of inflatable urethral/bladder neck sphincter, including pump, reservoir, and cuff                                                                                  | Repair of inflatable urethral/bladder neck sphincter, including pump, reservoir, and cuff      |
| 34832     | Open repair of infrarenal aortic aneurysm or dissection, plus repair of associated arterial trauma, following unsuccessful endovascular repair; aorto bifemoral prosthesis | Repair of infrarenal aortic aneurysm or dissection - open                                      |
| 34831     | Open repair of infrarenal aortic aneurysm or dissection, plus repair of associated arterial trauma, following unsuccessful endovascular repair; aorto bi-iliac prosthesis  | Repair of infrarenal aortic aneurysm or dissection - open                                      |
| 34830     | Open repair of infrarenal aortic aneurysm or dissection, plus repair of associated arterial trauma, following unsuccessful endovascular repair; tube prosthesis            | Repair of infrarenal aortic aneurysm or dissection - open                                      |
| 66680     | Repair of iris, ciliary body (as for iridodialysis)                                                                                                                        | Repair of iris, ciliary body                                                                   |
| 33724     | Repair of isolated partial anomalous pulmonary venous return (eg, Scimitar Syndrome)                                                                                       | Repair of isolated partial anomalous pulmonary venous return (eg, Scimitar Syndrome)           |
| 33414     | Repair of left ventricular outflow tract obstruction by patch enlargement of the outflow tract                                                                             | Repair of left ventricular outflow tract obstruction by patch enlargement of the outflow tract |
| 63706     | Repair of myelomeningocele; larger than 5 cm diameter                                                                                                                      | Repair of meningocele or myelomeningocele                                                      |
| 63704     | Repair of myelomeningocele; less than 5 cm diameter                                                                                                                        | Repair of meningocele or myelomeningocele                                                      |
| 63702     | Repair of meningocele; larger than 5 cm diameter                                                                                                                           | Repair of meningocele or myelomeningocele                                                      |
| 63700     | Repair of meningocele; less than 5 cm diameter                                                                                                                             | Repair of meningocele or myelomeningocele                                                      |

| Continued |                                                                                                                                                                                                                                                                                                                                                                                                                     |                                                                                                                                                        |
|-----------|---------------------------------------------------------------------------------------------------------------------------------------------------------------------------------------------------------------------------------------------------------------------------------------------------------------------------------------------------------------------------------------------------------------------|--------------------------------------------------------------------------------------------------------------------------------------------------------|
| Code      | Code description                                                                                                                                                                                                                                                                                                                                                                                                    | Procedure type                                                                                                                                         |
| 42260     | Repair of nasolabial fistula                                                                                                                                                                                                                                                                                                                                                                                        | Repair of nasolabial fistula                                                                                                                           |
| 33496     | Repair of non-structural prosthetic valve dysfunction with cardiopulmonary bypass (separate procedure)                                                                                                                                                                                                                                                                                                              | Repair of non-structural prosthetic valve dysfunction with cardiopulmonary bypass                                                                      |
| 49611     | Repair of omphalocele (Gross type operation); second stage                                                                                                                                                                                                                                                                                                                                                          | Repair of omphalocele or gastroschisis                                                                                                                 |
| 49610     | Repair of omphalocele (Gross type operation); first stage                                                                                                                                                                                                                                                                                                                                                           | Repair of omphalocele or gastroschisis                                                                                                                 |
| 49606     | Repair of large omphalocele or gastroschisis; with removal of prosthesis, final reduction and closure, in operating room                                                                                                                                                                                                                                                                                            | Repair of omphalocele or gastroschisis                                                                                                                 |
| 49605     | Repair of large omphalocele or gastroschisis; with or without prosthesis                                                                                                                                                                                                                                                                                                                                            | Repair of omphalocele or gastroschisis                                                                                                                 |
| 49600     | Repair of small omphalocele, with primary closure                                                                                                                                                                                                                                                                                                                                                                   | Repair of omphalocele or gastroschisis                                                                                                                 |
| 33824     | Repair of patent ductus arteriosus; by division, 18 years and older                                                                                                                                                                                                                                                                                                                                                 | Repair of patent ductus arteriosus                                                                                                                     |
| 33822     | Repair of patent ductus arteriosus; by division, younger than 18 years                                                                                                                                                                                                                                                                                                                                              | Repair of patent ductus arteriosus                                                                                                                     |
| 33820     | Repair of patent ductus arteriosus; by ligation                                                                                                                                                                                                                                                                                                                                                                     | Repair of patent ductus arteriosus                                                                                                                     |
| 33545     | Repair of postinfarction ventricular septal defect, with or without myocardial resection                                                                                                                                                                                                                                                                                                                            | Repair of postinfarction ventricular septal defect                                                                                                     |
| 33926     | Repair of pulmonary artery arborization anomalies by unifocalization; with cardiopulmonary bypass                                                                                                                                                                                                                                                                                                                   | Repair of pulmonary artery arborization anomalies by unifocalization                                                                                   |
| 33925     | Repair of pulmonary artery arborization anomalies by unifocalization; without cardiopulmonary bypass                                                                                                                                                                                                                                                                                                                | Repair of pulmonary artery arborization anomalies by unifocalization                                                                                   |
| 33917     | Repair of pulmonary artery stenosis by reconstruction with patch or graft                                                                                                                                                                                                                                                                                                                                           | Repair of pulmonary artery stenosis by reconstruction with patch or graft                                                                              |
| 33920     | Repair of pulmonary atresia with ventricular septal defect, by construction or replacement of conduit from right or left ventricle to pulmonary artery                                                                                                                                                                                                                                                              | Repair of pulmonary atresia with ventricular septal defect, by construction or replacement of conduit from right or left ventricle to pulmonary artery |
| 33726     | Repair of pulmonary venous stenosis                                                                                                                                                                                                                                                                                                                                                                                 | Repair of pulmonary venous stenosis                                                                                                                    |
| 45560     | Repair of rectocele (separate procedure)                                                                                                                                                                                                                                                                                                                                                                            | Repair of rectocele                                                                                                                                    |
| 67113     | Repair of complex retinal detachment (eg, proliferative vitreoretinopathy, stage C-1 or greater, diabetic traction retinal detachment, retinopathy of prematurity, retinal tear of greater than 90 degrees), with vitrectomy and membrane peeling, may include air, gas, or silicone oil tamponade, cryotherapy, endolaser photocoagulation, drainage of subretinal fluid, scleral buckling, and/or removal of lens | Repair of retinal detachment                                                                                                                           |
| 67112     | Repair of retinal detachment; by scleral buckling or vitrectomy, on patient having previous ipsilateral retinal detachment repair(s) using scleral buckling or vitrectomy techniques                                                                                                                                                                                                                                | Repair of retinal detachment                                                                                                                           |
| 67110     | Repair of retinal detachment; by injection of air or other gas (eg, pneumatic retinopexy)                                                                                                                                                                                                                                                                                                                           | Repair of retinal detachment                                                                                                                           |
| 67108     | Repair of retinal detachment; with vitrectomy, any method, with or without air or gas tamponade, focal endolaser photocoagulation, cryotherapy, drainage of subretinal fluid, scleral buckling, and/or removal of lens by same technique                                                                                                                                                                            | Repair of retinal detachment                                                                                                                           |
| 67107     | Repair of retinal detachment; scleral buckling (such as lamellar scleral dissection, imbrication or encircling procedure), with or without implant, with or without cryotherapy, photocoagulation, and drainage of subretinal fluid                                                                                                                                                                                 | Repair of retinal detachment                                                                                                                           |
| 23412     | Repair of ruptured musculotendinous cuff (eg, rotator cuff) open; chronic                                                                                                                                                                                                                                                                                                                                           | Repair of ruptured musculotendinous cuff - open                                                                                                        |
| 23410     | Repair of ruptured musculotendinous cuff (eg, rotator cuff) open; acute                                                                                                                                                                                                                                                                                                                                             | Repair of ruptured musculotendinous cuff - open                                                                                                        |
| 66225     | Repair of scleral staphyloma; with graft                                                                                                                                                                                                                                                                                                                                                                            | Repair of scleral staphyloma                                                                                                                           |
| 66220     | Repair of scleral staphyloma; without graft                                                                                                                                                                                                                                                                                                                                                                         | Repair of scleral staphyloma                                                                                                                           |
| 33619     | Repair of single ventricle with aortic outflow obstruction and aortic arch hypoplasia (hypoplastic left heart syndrome) (eg, Norwood procedure)                                                                                                                                                                                                                                                                     | Repair of single ventricle with aortic outflow obstruction and aortic arch hypoplasia                                                                  |
| 68340     | Repair of symblepharon; division of symblepharon, with or without insertion of conformer or contact lens                                                                                                                                                                                                                                                                                                            | Repair of symblepharon                                                                                                                                 |
| 68335     | Repair of symblepharon; with free graft conjunctiva or buccal mucous membrane (includes obtaining graft)                                                                                                                                                                                                                                                                                                            | Repair of symblepharon                                                                                                                                 |
| 68330     | Repair of symblepharon; conjunctivoplasty, without graft                                                                                                                                                                                                                                                                                                                                                            | Repair of symblepharon                                                                                                                                 |
| 26562     | Repair of syndactyly (web finger) each web space; complex (eg, involving bone, nails)                                                                                                                                                                                                                                                                                                                               | Repair of syndactyly                                                                                                                                   |
| 26561     | Repair of syndactyly (web finger) each web space; with skin flaps and grafts                                                                                                                                                                                                                                                                                                                                        | Repair of syndactyly                                                                                                                                   |

| Continued |                                                                                                                                                                             |                                                                      |
|-----------|-----------------------------------------------------------------------------------------------------------------------------------------------------------------------------|----------------------------------------------------------------------|
| Code      | Code description                                                                                                                                                            | Procedure type                                                       |
| 26560     | Repair of syndactyly (web finger) each web space; with skin flaps                                                                                                           | Repair of syndactyly                                                 |
| 33781     | Repair of transposition of the great arteries, aortic pulmonary artery reconstruction (eg, Jatene type); with repair of subpulmonic obstruction                             | Repair of transposition of the great arteries                        |
| 33780     | Repair of transposition of the great arteries, aortic pulmonary artery reconstruction (eg, Jatene type); with closure of ventricular septal defect                          | Repair of transposition of the great arteries                        |
| 33779     | Repair of transposition of the great arteries, aortic pulmonary artery reconstruction (eg, Jatene type); with removal of pulmonary band                                     | Repair of transposition of the great arteries                        |
| 33778     | Repair of transposition of the great arteries, aortic pulmonary artery reconstruction (eg, Jatene type);                                                                    | Repair of transposition of the great arteries                        |
| 33777     | Repair of transposition of the great arteries, atrial baffle procedure (eg, Mustard or Senning type) with cardiopulmonary bypass; with repair of subpulmonic obstruction    | Repair of transposition of the great arteries                        |
| 33776     | Repair of transposition of the great arteries, atrial baffle procedure (eg, Mustard or Senning type) with cardiopulmonary bypass; with closure of ventricular septal defect | Repair of transposition of the great arteries                        |
| 33775     | Repair of transposition of the great arteries, atrial baffle procedure (eg, Mustard or Senning type) with cardiopulmonary bypass; with removal of pulmonary band            | Repair of transposition of the great arteries                        |
| 33774     | Repair of transposition of the great arteries, atrial baffle procedure (eg, Mustard or Senning type) with cardiopulmonary bypass;                                           | Repair of transposition of the great arteries                        |
| 33771     | Repair of transposition of the great arteries with ventricular septal defect and subpulmonary stenosis; with surgical enlargement of ventricular septal defect              | Repair of transposition of the great arteries                        |
| 33770     | Repair of transposition of the great arteries with ventricular septal defect and subpulmonary stenosis; without surgical enlargement of ventricular septal defect           | Repair of transposition of the great arteries                        |
| 55060     | Repair of tunica vaginalis hydrocele (Bottle type)                                                                                                                          | Repair of tunica vaginalis hydrocele                                 |
| 65290     | Repair of wound, extraocular muscle, tendon and/or Tenon's capsule                                                                                                          | Repair of wound, extraocular muscle, tendon and/or Tenon's capsule   |
| 26545     | Reconstruction, collateral ligament, interphalangeal joint, single, including graft, each joint                                                                             | Repair or reconstruction of collateral ligament, hand and/or fingers |
| 26542     | Reconstruction, collateral ligament, metacarpophalangeal joint, single; with local tissue (eg, adductor advancement)                                                        | Repair or reconstruction of collateral ligament, hand and/or fingers |
| 26541     | Reconstruction, collateral ligament, metacarpophalangeal joint, single; with tendon or fascial graft (includes obtaining graft)                                             | Repair or reconstruction of collateral ligament, hand and/or fingers |
| 26540     | Repair of collateral ligament, metacarpophalangeal or interphalangeal joint                                                                                                 | Repair or reconstruction of collateral ligament, hand and/or fingers |
| 35190     | Repair, acquired or traumatic arteriovenous fistula; extremities                                                                                                            | Repair of arteriovenous fistula, congenital                          |
| 35189     | Repair, acquired or traumatic arteriovenous fistula; thorax and abdomen                                                                                                     | Repair of arteriovenous fistula, congenital                          |
| 35188     | Repair, acquired or traumatic arteriovenous fistula; head and neck                                                                                                          | Repair of arteriovenous fistula, congenital                          |
| 35184     | Repair, congenital arteriovenous fistula; extremities                                                                                                                       | Repair of arteriovenous fistula, congenital                          |
| 35182     | Repair, congenital arteriovenous fistula; thorax and abdomen                                                                                                                | Repair of arteriovenous fistula, congenital                          |
| 35180     | Repair, congenital arteriovenous fistula; head and neck                                                                                                                     | Repair of arteriovenous fistula, congenital                          |
| 27656     | Repair, fascial defect of leg                                                                                                                                               | Repair of fascial defect of leg                                      |
| 28322     | Repair, nonunion or malunion; metatarsal, with or without bone graft (includes obtaining graft)                                                                             | Repair of nonunion or malunion, foot bones                           |
| 28320     | Repair, nonunion or malunion; tarsal bones                                                                                                                                  | Repair of nonunion or malunion, foot bones                           |
| 69666     | Repair oval window fistula                                                                                                                                                  | Repair of oval window fistula                                        |
| 43335     | Repair, paraesophageal hiatal hernia (including fundoplication), via thoracotomy, except neonatal; with implantation of mesh or other prosthesis                            | Repair of paraesophageal hiatal hernia (including fundoplication)    |
| 43334     | Repair, paraesophageal hiatal hernia (including fundoplication), via thoracotomy, except neonatal; without implantation of mesh or other prosthesis                         | Repair of paraesophageal hiatal hernia (including fundoplication)    |
| 43337     | Repair, paraesophageal hiatal hernia, (including fundoplication), via thoracoabdominal incision, except neonatal; with implantation of mesh or other prosthesis             | Repair of paraesophageal hiatal hernia (including fundoplication)    |
| 43336     | Repair, paraesophageal hiatal hernia, (including fundoplication), via thoracoabdominal incision, except neonatal; without implantation of mesh or other prosthesis          | Repair of paraesophageal hiatal hernia (including fundoplication)    |
| 43333     | Repair, paraesophageal hiatal hernia (including fundoplication), via laparotomy, except neonatal; with implantation of mesh or other prosthesis                             | Repair of paraesophageal hiatal hernia (including fundoplication)    |
| 43332     | Repair, paraesophageal hiatal hernia (including fundoplication), via laparotomy, except neonatal; without implantation of mesh or other prosthesis                          | Repair of paraesophageal hiatal hernia (including fundoplication)    |
| 27409     | Repair, primary, torn ligament and/or capsule, knee; collateral and cruciate ligaments                                                                                      | Repair of primary, torn ligament and/or capsule, knee                |

| Continued |                                                                                                                                                                                          |                                                                                                                                                                                                                |
|-----------|------------------------------------------------------------------------------------------------------------------------------------------------------------------------------------------|----------------------------------------------------------------------------------------------------------------------------------------------------------------------------------------------------------------|
| Code      | Code description                                                                                                                                                                         | Procedure type                                                                                                                                                                                                 |
| 27407     | Repair, primary, torn ligament and/or capsule, knee; cruciate                                                                                                                            | Repair of primary, torn ligament and/or capsule, knee                                                                                                                                                          |
| 27405     | Repair, primary, torn ligament and/or capsule, knee; collateral                                                                                                                          | Repair of primary, torn ligament and/or capsule, knee                                                                                                                                                          |
| 69667     | Repair round window fistula                                                                                                                                                              | Repair of round window fistula                                                                                                                                                                                 |
| 27654     | Repair, secondary, Achilles tendon, with or without graft                                                                                                                                | Repair of ruptured Achilles tendon                                                                                                                                                                             |
| 27652     | Repair, primary - open or percutaneous, ruptured Achilles tendon; with graft (includes obtaining graft)                                                                                  | Repair of ruptured Achilles tendon                                                                                                                                                                             |
| 27650     | Repair, primary - open or percutaneous, ruptured Achilles tendon;                                                                                                                        | Repair of ruptured Achilles tendon                                                                                                                                                                             |
| 33720     | Repair sinus of Valsalva aneurysm, with cardiopulmonary bypass                                                                                                                           | Repair of sinus of Valsalva aneurysm, with cardiopulmonary bypass                                                                                                                                              |
| 33710     | Repair sinus of Valsalva fistula, with cardiopulmonary bypass; with repair of ventricular septal defect                                                                                  | Repair of sinus of Valsalva fistula                                                                                                                                                                            |
| 33702     | Repair sinus of Valsalva fistula, with cardiopulmonary bypass;                                                                                                                           | Repair of sinus of Valsalva fistula                                                                                                                                                                            |
| 50840     | Replacement of all or part of ureter by intestine segment, including intestine anastomosis                                                                                               | Replacement of all or part of ureter by intestine segment, including intestine anastomosis                                                                                                                     |
| 11970     | Replacement of tissue expander with permanent prosthesis                                                                                                                                 | Replacement of tissue expander with permanent prosthesis                                                                                                                                                       |
| 33983     | Replacement of ventricular assist device pump(s); implantable intracorporeal, single ventricle, with cardiopulmonary bypass                                                              | Replacement of ventricular assist device                                                                                                                                                                       |
| 33982     | Replacement of ventricular assist device pump(s); implantable intracorporeal, single ventricle, without cardiopulmonary bypass                                                           | Replacement of ventricular assist device                                                                                                                                                                       |
| 33981     | Replacement of extracorporeal ventricular assist device, single or biventricular, pump(s), single or each pump                                                                           | Replacement of ventricular assist device                                                                                                                                                                       |
| 62194     | Replacement or irrigation, subarachnoid/subdural catheter                                                                                                                                | Replacement or irrigation, subarachnoid/subdural catheter                                                                                                                                                      |
| 63744     | Replacement, irrigation or revision of lumbo-subarachnoid shunt                                                                                                                          | Replacement, irrigation or revision of lumbo-subarachnoid shunt                                                                                                                                                |
| 54438     | Replantation, penis, complete amputation including urethral repair                                                                                                                       | Replantation, upper extremity                                                                                                                                                                                  |
| 20838     | Replantation, foot, complete amputation                                                                                                                                                  | Replantation, upper extremity                                                                                                                                                                                  |
| 20827     | Replantation, thumb (includes distal tip to MP joint), complete amputation                                                                                                               | Replantation, upper extremity                                                                                                                                                                                  |
| 20824     | Replantation, thumb (includes carpometacarpal joint to MP joint), complete amputation                                                                                                    | Replantation, upper extremity                                                                                                                                                                                  |
| 20822     | Replantation, digit, excluding thumb (includes distal tip to sublimis tendon insertion), complete amputation                                                                             | Replantation, upper extremity                                                                                                                                                                                  |
| 20816     | Replantation, digit, excluding thumb (includes metacarpophalangeal joint to insertion of flexor sublimis tendon), complete amputation                                                    | Replantation, upper extremity                                                                                                                                                                                  |
| 20808     | Replantation, hand (includes hand through metacarpophalangeal joints), complete amputation                                                                                               | Replantation, upper extremity                                                                                                                                                                                  |
| 20805     | Replantation, forearm (includes radius and ulna to radial carpal joint), complete amputation                                                                                             | Replantation, upper extremity                                                                                                                                                                                  |
| 20802     | Replantation, arm (includes surgical neck of humerus through elbow joint), complete amputation                                                                                           | Replantation, upper extremity                                                                                                                                                                                  |
| 66825     | Repositioning of intraocular lens prosthesis, requiring an incision (separate procedure)                                                                                                 | Repositioning of intraocular lens prosthesis, requiring an incision                                                                                                                                            |
| 58956     | Bilateral salpingo-oophorectomy with total omentectomy, total abdominal hysterectomy for malignancy                                                                                      | Resection (initial) of ovarian, tubal or primary peritoneal malignancy with bilateral salpingo-oophorectomy and omentectomy; with total abdominal hysterectomy, pelvic and limited para-aortic lymphadenectomy |
| 58954     | Bilateral salpingo-oophorectomy with omentectomy, total abdominal hysterectomy and radical dissection for debulking; with pelvic lymphadenectomy and limited para-aortic lymphadenectomy | Resection (initial) of ovarian, tubal or primary peritoneal malignancy with bilateral salpingo-oophorectomy and omentectomy; with total abdominal hysterectomy, pelvic and limited para-aortic lymphadenectomy |

| Continued |                                                                                                                                                                                                                                                     |                                                                                                                                                                                                                |
|-----------|-----------------------------------------------------------------------------------------------------------------------------------------------------------------------------------------------------------------------------------------------------|----------------------------------------------------------------------------------------------------------------------------------------------------------------------------------------------------------------|
| Code      | Code description                                                                                                                                                                                                                                    | Procedure type                                                                                                                                                                                                 |
| 58953     | Bilateral salpingo-oophorectomy with omentectomy, total abdominal hysterectomy and radical dissection for debulking;                                                                                                                                | Resection (initial) of ovarian, tubal or primary peritoneal malignancy with bilateral salpingo-oophorectomy and omentectomy; with total abdominal hysterectomy, pelvic and limited para-aortic lymphadenectomy |
| 58952     | Resection (initial) of ovarian, tubal or primary peritoneal malignancy with bilateral salpingo-oophorectomy and omentectomy; with radical dissection for debulking (ie, radical excision or destruction, intra-abdominal or retroperitoneal tumors) | Resection (initial) of ovarian, tubal or primary peritoneal malignancy with bilateral salpingo-oophorectomy and omentectomy; with total abdominal hysterectomy, pelvic and limited para-aortic lymphadenectomy |
| 58951     | Resection (initial) of ovarian, tubal or primary peritoneal malignancy with bilateral salpingo-oophorectomy and omentectomy; with total abdominal hysterectomy, pelvic and limited para-aortic lymphadenectomy                                      | Resection (initial) of ovarian, tubal or primary peritoneal malignancy with bilateral salpingo-oophorectomy and omentectomy; with total abdominal hysterectomy, pelvic and limited para-aortic lymphadenectomy |
| 32503     | Resection of apical lung tumor (eg, Pancoast tumor), including chest wall resection, rib(s) resection(s), neurovascular dissection, when performed; without chest wall reconstruction(s)                                                            | Resection of apical lung tumor                                                                                                                                                                                 |
| 32504     | Resection of apical lung tumor (eg, Pancoast tumor), including chest wall resection, rib(s) resection(s), neurovascular dissection, when performed; with chest wall reconstruction                                                                  | Resection of apical lung tumor                                                                                                                                                                                 |
| 39561     | Resection, diaphragm; with complex repair (eg, prosthetic material, local muscle flap)                                                                                                                                                              | Resection of diaphragm                                                                                                                                                                                         |
| 39560     | Resection, diaphragm; with simple repair (eg, primary suture)                                                                                                                                                                                       | Resection of diaphragm                                                                                                                                                                                         |
| 24155     | Resection of elbow joint (arthrectomy)                                                                                                                                                                                                              | Resection of elbow joint (arthrectomy)                                                                                                                                                                         |
| 33130     | Resection of external cardiac tumor                                                                                                                                                                                                                 | Resection of external cardiac tumor                                                                                                                                                                            |
| 23195     | Resection, humeral head                                                                                                                                                                                                                             | Resection of humeral head                                                                                                                                                                                      |
| 39200     | Resection of mediastinal cyst                                                                                                                                                                                                                       | Resection of mediastinal cyst                                                                                                                                                                                  |
| 39220     | Resection of mediastinal tumor                                                                                                                                                                                                                      | Resection of mediastinal tumor                                                                                                                                                                                 |
| 28160     | Hemiphalangectomy or interphalangeal joint excision, toe, proximal end of phalanx, each                                                                                                                                                             | Resection of metatarsal or toe                                                                                                                                                                                 |
| 28153     | Resection, condyle(s), distal end of phalanx, each toe                                                                                                                                                                                              | Resection of metatarsal or toe                                                                                                                                                                                 |
| 28150     | Phalangectomy, toe, each toe                                                                                                                                                                                                                        | Resection of metatarsal or toe                                                                                                                                                                                 |
| 28140     | Metatarsectomy                                                                                                                                                                                                                                      | Resection of metatarsal or toe                                                                                                                                                                                 |
| 28130     | Talectomy (astragalectomy)                                                                                                                                                                                                                          | Resection of metatarsal or toe                                                                                                                                                                                 |
| 28126     | Resection, partial or complete, phalangeal base, each toe                                                                                                                                                                                           | Resection of metatarsal or toe                                                                                                                                                                                 |
| 42120     | Resection of palate or extensive resection of lesion                                                                                                                                                                                                | Resection of palate or extensive resection of lesion                                                                                                                                                           |
| 33050     | Resection of pericardial cyst or tumor                                                                                                                                                                                                              | Resection of pericardial cyst or tumor                                                                                                                                                                         |
| 42892     | Resection of lateral pharyngeal wall or pyriform sinus, direct closure by advancement of lateral and posterior pharyngeal walls                                                                                                                     | Resection of pharyngeal wall                                                                                                                                                                                   |
| 42894     | Resection of pharyngeal wall requiring closure with myocutaneous or fasciocutaneous flap or free muscle, skin, or fascial flap with microvascular anastomosis                                                                                       | Resection of pharyngeal wall                                                                                                                                                                                   |
| 58957     | Resection (tumor debulking) of recurrent ovarian, tubal, primary peritoneal, uterine malignancy (intra-abdominal, retroperitoneal tumors), with omentectomy, if performed;                                                                          | Resection of recurrent ovarian, tubal, primary peritoneal, uterine malignancy                                                                                                                                  |
| 58958     | Resection (tumor debulking) of recurrent ovarian, tubal, primary peritoneal, uterine malignancy (intra-abdominal, retroperitoneal tumors), with omentectomy, if performed; with pelvic lymphadenectomy and limited para-aortic lymphadenectomy      | Resection of recurrent ovarian, tubal, primary peritoneal, uterine malignancy                                                                                                                                  |
| 32900     | Resection of ribs, extrapleural, all stages                                                                                                                                                                                                         | Resection of ribs, extrapleural, all stages                                                                                                                                                                    |
| 55150     | Resection of scrotum                                                                                                                                                                                                                                | Resection of scrotum                                                                                                                                                                                           |
| 69535     | Resection temporal bone, external approach                                                                                                                                                                                                          | Resection of temporal bone, external approach                                                                                                                                                                  |
| 48105     | Resection or debridement of pancreas and peripancreatic tissue for acute necrotizing pancreatitis                                                                                                                                                   | Resection or debridement of pancreas and peripancreatic tissue for acute necrotizing pancreatitis                                                                                                              |
| 61608     | Resection or excision of neoplastic, vascular or infectious lesion of parasellar area, cavernous sinus, clivus or midline skull base; intradural, including dural repair, with or without graft                                                     | Resection or excision of neoplastic, vascular or infectious lesion, intracranial                                                                                                                               |

| Continued |                                                                                                                                                                                                                                |                                                                                      |
|-----------|--------------------------------------------------------------------------------------------------------------------------------------------------------------------------------------------------------------------------------|--------------------------------------------------------------------------------------|
| Code      | Code description                                                                                                                                                                                                               | Procedure type                                                                       |
| 61607     | Resection or excision of neoplastic, vascular or infectious lesion of parasellar area, cavernous sinus, clivus or midline skull base; extradural                                                                               | Resection or excision of neoplastic, vascular or infectious lesion, intracranial     |
| 61606     | Resection or excision of neoplastic, vascular or infectious lesion of infratemporal fossa, parapharyngeal space, petrous apex; intradural, including dural repair, with or without graft                                       | Resection or excision of neoplastic, vascular or infectious lesion, intracranial     |
| 61605     | Resection or excision of neoplastic, vascular or infectious lesion of infratemporal fossa, parapharyngeal space, petrous apex; extradural                                                                                      | Resection or excision of neoplastic, vascular or infectious lesion, intracranial     |
| 61601     | Resection or excision of neoplastic, vascular or infectious lesion of base of anterior cranial fossa; intradural, including dural repair, with or without graft                                                                | Resection or excision of neoplastic, vascular or infectious lesion, intracranial     |
| 61600     | Resection or excision of neoplastic, vascular or infectious lesion of base of anterior cranial fossa; extradural                                                                                                               | Resection or excision of neoplastic, vascular or infectious lesion, intracranial     |
| 61616     | Resection or excision of neoplastic, vascular or infectious lesion of base of posterior cranial fossa, jugular foramen, foramen magnum, or C1-C3 vertebral bodies; intradural, including dural repair, with or without graft   | Resection or excision of neoplastic, vascular or infectious lesion, intracranial     |
| 61615     | Resection or excision of neoplastic, vascular or infectious lesion of base of posterior cranial fossa, jugular foramen, foramen magnum, or C1-C3 vertebral bodies; extradural                                                  | Resection or excision of neoplastic, vascular or infectious lesion, intracranial     |
| 33415     | Resection or incision of subvalvular tissue for discrete subvalvular aortic stenosis                                                                                                                                           | Resection or incision of subvalvular tissue for discrete subvalvular aortic stenosis |
| 23440     | Resection or transplantation of long tendon of biceps                                                                                                                                                                          | Resection or transplantation of long tendon of biceps                                |
| 37231     | Revascularization, endovascular - open or percutaneous, tibial, peroneal artery, unilateral, initial vessel; with transluminal stent placement(s) and atherectomy, includes angioplasty within the same vessel, when performed | Endovascular revascularization, lower extremity                                      |
| 37230     | Revascularization, endovascular - open or percutaneous, tibial, peroneal artery, unilateral, initial vessel; with transluminal stent placement(s), includes angioplasty within the same vessel, when performed                 | Endovascular revascularization, lower extremity                                      |
| 37229     | Revascularization, endovascular - open or percutaneous, tibial, peroneal artery, unilateral, initial vessel; with atherectomy, includes angioplasty within the same vessel, when performed                                     | Endovascular revascularization, lower extremity                                      |
| 37228     | Revascularization, endovascular - open or percutaneous, tibial, peroneal artery, unilateral, initial vessel; with transluminal angioplasty                                                                                     | Endovascular revascularization, lower extremity                                      |
| 37227     | Revascularization, endovascular - open or percutaneous, femoral, popliteal artery(s), unilateral; with transluminal stent placement(s) and atherectomy, includes angioplasty within the same vessel, when performed            | Endovascular revascularization, lower extremity                                      |
| 37226     | Revascularization, endovascular - open or percutaneous, femoral, popliteal artery(s), unilateral; with transluminal stent placement(s), includes angioplasty within the same vessel, when performed                            | Endovascular revascularization, lower extremity                                      |
| 37225     | Revascularization, endovascular - open or percutaneous, femoral, popliteal artery(s), unilateral; with atherectomy, includes angioplasty within the same vessel, when performed                                                | Endovascular revascularization, lower extremity                                      |
| 37224     | Revascularization, endovascular - open or percutaneous, femoral, popliteal artery(s), unilateral; with transluminal angioplasty                                                                                                | Endovascular revascularization, lower extremity                                      |
| 37221     | Revascularization, endovascular - open or percutaneous, iliac artery, unilateral, initial vessel; with transluminal stent placement(s), includes angioplasty within the same vessel, when performed                            | Endovascular revascularization, lower extremity                                      |
| 37220     | Revascularization, endovascular - open or percutaneous, iliac artery, unilateral, initial vessel; with transluminal angioplasty                                                                                                | Endovascular revascularization, lower extremity                                      |
| 57426     | Revision (including removal) of prosthetic vaginal graft - laparoscopic approach                                                                                                                                               | Revision (including removal) of prosthetic vaginal graft - laparoscopic              |
| 57296     | Revision (including removal) of prosthetic vaginal graft; open abdominal approach                                                                                                                                              | Revision (including removal) of prosthetic vaginal graft - open                      |
| 57295     | Revision (including removal) of prosthetic vaginal graft; vaginal approach                                                                                                                                                     | Revision (including removal) of prosthetic vaginal graft - open                      |
| 36833     | Revision - open, arteriovenous fistula; with thrombectomy, autogenous or nonautogenous dialysis graft (separate procedure)                                                                                                     | Revision and/or thrombectomy of arteriovenous fistula                                |
| 36832     | Revision - open, arteriovenous fistula; without thrombectomy, autogenous or nonautogenous dialysis graft (separate procedure)                                                                                                  | Revision and/or thrombectomy of arteriovenous fistula                                |
| 36831     | Thrombectomy - open, arteriovenous fistula without revision, autogenous or nonautogenous dialysis graft (separate procedure)                                                                                                   | Revision and/or thrombectomy of arteriovenous fistula                                |

| Continued |                                                                                                                                                                                 |                                                                                                                       |
|-----------|---------------------------------------------------------------------------------------------------------------------------------------------------------------------------------|-----------------------------------------------------------------------------------------------------------------------|
| Code      | Code description                                                                                                                                                                | Procedure type                                                                                                        |
| 66185     | Revision of aqueous shunt to extraocular reservoir                                                                                                                              | Revision of aqueous shunt to extraocular equatorial plate reservoir                                                   |
| 25449     | Revision of arthroplasty, including removal of implant, wrist joint                                                                                                             | Revision of aqueous shunt to extraocular equatorial plate reservoir                                                   |
| 61888     | Revision or removal of cranial neurostimulator pulse generator or receiver                                                                                                      | Revision of cranial neurostimulator pulse generator or receiver                                                       |
| 35884     | Revision, femoral anastomosis of synthetic arterial bypass graft in groin - open; with autogenous vein patch graft                                                              | Revision of femoral anastomosis of synthetic arterial bypass graft in groin                                           |
| 35883     | Revision, femoral anastomosis of synthetic arterial bypass graft in groin - open; with nonautogenous patch graft (eg, Dacron, ePTFE, bovine pericardium)                        | Revision of femoral anastomosis of synthetic arterial bypass graft in groin                                           |
| 69840     | Revision fenestration operation                                                                                                                                                 | Revision of fenestration operation                                                                                    |
| 43848     | Revision - open, of gastric restrictive procedure for morbid obesity, other than adjustable gastric restrictive device (separate procedure)                                     | Revision of gastric restrictive procedure for morbid obesity, other than adjustable gastric restrictive device - open |
| 43865     | Revision of gastrojejunal anastomosis (gastrojejunostomy) with reconstruction, with or without partial gastrectomy or intestine resection; with vagotomy                        | Revision of gastroduodenal or gastrojejunal anastomosis                                                               |
| 43860     | Revision of gastrojejunal anastomosis (gastrojejunostomy) with reconstruction, with or without partial gastrectomy or intestine resection; without vagotomy                     | Revision of gastroduodenal or gastrojejunal anastomosis                                                               |
| 43855     | Revision of gastroduodenal anastomosis (gastroduodenostomy) with reconstruction; with vagotomy                                                                                  | Revision of gastroduodenal or gastrojejunal anastomosis                                                               |
| 43850     | Revision of gastroduodenal anastomosis (gastroduodenostomy) with reconstruction; without vagotomy                                                                               | Revision of gastroduodenal or gastrojejunal anastomosis                                                               |
| 35881     | Revision, lower extremity arterial bypass, without thrombectomy - open; with segmental vein interposition                                                                       | Revision of lower extremity arterial bypass                                                                           |
| 35879     | Revision, lower extremity arterial bypass, without thrombectomy - open; with vein patch angioplasty                                                                             | Revision of lower extremity arterial bypass                                                                           |
| 49426     | Revision of peritoneal-venous shunt                                                                                                                                             | Revision of peritoneal-venous shunt                                                                                   |
| 19380     | Revision of reconstructed breast                                                                                                                                                | Revision of reconstructed breast                                                                                      |
| 69662     | Revision of stapedectomy or stapedotomy                                                                                                                                         | Revision of stapedectomy or stapedotomy                                                                               |
| 24371     | Revision of total elbow arthroplasty, including allograft when performed; humeral and ulnar component                                                                           | Arthroplasty of elbow                                                                                                 |
| 24370     | Revision of total elbow arthroplasty, including allograft when performed; humeral or ulnar component                                                                            | Arthroplasty of elbow                                                                                                 |
| 23474     | Revision of total shoulder arthroplasty, including allograft when performed; humeral and glenoid component                                                                      | Arthroplasty of shoulder                                                                                              |
| 23473     | Revision of total shoulder arthroplasty, including allograft when performed; humeral or glenoid component                                                                       | Arthroplasty of shoulder                                                                                              |
| 31830     | Revision of tracheostomy scar                                                                                                                                                   | Revision of tracheostomy scar                                                                                         |
| 50728     | Revision of urinary-cutaneous anastomosis (any type urostomy); with repair of fascial defect and hernia                                                                         | Revision of urinary-cutaneous anastomosis                                                                             |
| 50727     | Revision of urinary-cutaneous anastomosis (any type urostomy);                                                                                                                  | Revision of urinary-cutaneous anastomosis                                                                             |
| 61880     | Revision or removal of intracranial neurostimulator electrodes                                                                                                                  | Neurostimulator procedures                                                                                            |
| 64585     | Revision or removal of peripheral neurostimulator electrode array                                                                                                               | Neurostimulator procedures                                                                                            |
| 64595     | Revision or removal of peripheral or gastric neurostimulator pulse generator or receiver                                                                                        | Neurostimulator procedures                                                                                            |
| 66250     | Revision or repair of operative wound of anterior segment, any type, early or late, major or minor procedure                                                                    | Revision or repair of operative wound of anterior segment of eye                                                      |
| 64569     | Revision or replacement of cranial nerve (eg, vagus nerve) neurostimulator electrode array, including connection to existing pulse generator                                    | Neurostimulator procedures                                                                                            |
| 64583     | Revision or replacement of hypoglossal nerve neurostimulator array and distal respiratory sensor electrode or electrode array, including connection to existing pulse generator | Neurostimulator procedures                                                                                            |
| 30160     | Rhinectomy; total                                                                                                                                                               | Rhinectomy                                                                                                            |
| 30150     | Rhinectomy; partial                                                                                                                                                             | Rhinectomy                                                                                                            |
| 30630     | Repair nasal septal perforations                                                                                                                                                | Rhinoplasty                                                                                                           |
| 30520     | Septoplasty or submucous resection, with or without cartilage scoring, contouring or replacement with graft                                                                     | Rhinoplasty                                                                                                           |
| 30468     | Repair of nasal valve collapse with subcutaneous/submucosal lateral wall implant(s)                                                                                             | Rhinoplasty                                                                                                           |
| 30465     | Repair of nasal vestibular stenosis (eg, spreader grafting, lateral nasal wall reconstruction)                                                                                  | Rhinoplasty                                                                                                           |

| Continued |                                                                                                                                                                                                                                                                                |                                                         |
|-----------|--------------------------------------------------------------------------------------------------------------------------------------------------------------------------------------------------------------------------------------------------------------------------------|---------------------------------------------------------|
| Code      | Code description                                                                                                                                                                                                                                                               | Procedure type                                          |
| 30462     | Rhinoplasty for nasal deformity secondary to congenital cleft lip and/or palate, including columellar lengthening; tip, septum, osteotomies                                                                                                                                    | Rhinoplasty                                             |
| 30460     | Rhinoplasty for nasal deformity secondary to congenital cleft lip and/or palate, including columellar lengthening; tip only                                                                                                                                                    | Rhinoplasty                                             |
| 30450     | Rhinoplasty, secondary; major revision (nasal tip work and osteotomies)                                                                                                                                                                                                        | Rhinoplasty                                             |
| 30435     | Rhinoplasty, secondary; intermediate revision (bony work with osteotomies)                                                                                                                                                                                                     | Rhinoplasty                                             |
| 30430     | Rhinoplasty, secondary; minor revision (small amount of nasal tip work)                                                                                                                                                                                                        | Rhinoplasty                                             |
| 30420     | Rhinoplasty, primary; including major septal repair                                                                                                                                                                                                                            | Rhinoplasty                                             |
| 30410     | Rhinoplasty, primary; complete, external parts including bony pyramid, lateral and alar cartilages, and/or elevation of nasal tip                                                                                                                                              | Rhinoplasty                                             |
| 30400     | Rhinoplasty, primary; lateral and alar cartilages and/or elevation of nasal tip                                                                                                                                                                                                | Rhinoplasty                                             |
| 21616     | Excision first and/or cervical rib; with sympathectomy                                                                                                                                                                                                                         | Rib excision                                            |
| 21615     | Excision first and/or cervical rib;                                                                                                                                                                                                                                            | Rib excision                                            |
| 21600     | Excision of rib, partial                                                                                                                                                                                                                                                       | Rib excision                                            |
| 33476     | Right ventricular resection for infundibular stenosis, with or without commissurotomy                                                                                                                                                                                          | Right ventricular resection for infundibular stenosis   |
| 58700     | Salpingectomy, complete or partial, unilateral or bilateral (separate procedure)                                                                                                                                                                                               | Salpingectomy                                           |
| 58950     | Resection (initial) of ovarian, tubal or primary peritoneal malignancy with bilateral salpingo-oophorectomy and omentectomy;                                                                                                                                                   | Salpingo-oophorectomy                                   |
| 58720     | Salpingo-oophorectomy, complete or partial, unilateral or bilateral (separate procedure)                                                                                                                                                                                       | Salpingo-oophorectomy                                   |
| 58770     | Salpingostomy (salpingoneostomy)                                                                                                                                                                                                                                               | Salpingostomy                                           |
| 23400     | Scapulopexy (eg, Sprengels deformity or for paralysis)                                                                                                                                                                                                                         | Scapulopexy                                             |
| 67255     | Scleral reinforcement (separate procedure); with graft                                                                                                                                                                                                                         | Scleral reinforcement                                   |
| 67250     | Scleral reinforcement (separate procedure); without graft                                                                                                                                                                                                                      | Scleral reinforcement                                   |
| 55180     | Scrotoplasty; complicated                                                                                                                                                                                                                                                      | Scrotoplasty                                            |
| 55175     | Scrotoplasty; simple                                                                                                                                                                                                                                                           | Scrotoplasty                                            |
| 13160     | Secondary closure of surgical wound or dehiscence, extensive or complicated                                                                                                                                                                                                    | Secondary closure of surgical wound or dehiscence       |
| 61619     | Secondary repair of dura for cerebrospinal fluid leak, anterior, middle or posterior cranial fossa following surgery of the skull base; by local or regionalized vascularized pedicle flap or myocutaneous flap (including galea, temporalis, frontalis or occipitalis muscle) | Secondary repair of dura for cerebrospinal fluid leak   |
| 61618     | Secondary repair of dura for cerebrospinal fluid leak, anterior, middle or posterior cranial fossa following surgery of the skull base; by free tissue graft (eg, pericranium, fascia, tensor fascia lata, adipose tissue, homologous or synthetic grafts)                     | Secondary repair of dura for cerebrospinal fluid leak   |
| 21275     | Secondary revision of orbitocraniofacial reconstruction                                                                                                                                                                                                                        | Secondary revision of orbitocraniofacial reconstruction |
| 31595     | Section recurrent laryngeal nerve, therapeutic (separate procedure), unilateral                                                                                                                                                                                                | Section of recurrent laryngeal nerve, therapeutic       |
| 30620     | Septal or other intranasal dermatoplasty (does not include obtaining graft)                                                                                                                                                                                                    | Septal or other intranasal dermatoplasty                |
| 23174     | Sequestrectomy (eg, for osteomyelitis or bone abscess), humeral head to surgical neck                                                                                                                                                                                          | Sequestrectomy of bone in upper extremity               |
| 24138     | Sequestrectomy (eg, for osteomyelitis or bone abscess), olecranon process                                                                                                                                                                                                      | Sequestrectomy of bone in upper extremity               |
| 24136     | Sequestrectomy (eg, for osteomyelitis or bone abscess), radial head or neck                                                                                                                                                                                                    | Sequestrectomy of bone in upper extremity               |
| 24134     | Sequestrectomy (eg, for osteomyelitis or bone abscess), shaft or distal humerus                                                                                                                                                                                                | Sequestrectomy of bone in upper extremity               |
| 25145     | Sequestrectomy (eg, for osteomyelitis or bone abscess), forearm and/or wrist                                                                                                                                                                                                   | Sequestrectomy of bone in upper extremity               |
| 23172     | Sequestrectomy (eg, for osteomyelitis or bone abscess), scapula                                                                                                                                                                                                                | Sequestrectomy of shoulder                              |
| 23170     | Sequestrectomy (eg, for osteomyelitis or bone abscess), clavicle                                                                                                                                                                                                               | Sequestrectomy of shoulder                              |
| 28315     | Sesamoidectomy, first toe (separate procedure)                                                                                                                                                                                                                                 | Sesamoidectomy, first toe                               |
| 26185     | Sesamoidectomy, thumb or finger (separate procedure)                                                                                                                                                                                                                           | Sesamoidectomy, thumb or finger                         |
| 65880     | Severing adhesions of anterior segment of eye, incisional technique (with or without injection of air or liquid) (separate procedure); corneovitreal adhesions                                                                                                                 | Severing adhesions of anterior segment of eye           |
| 65875     | Severing adhesions of anterior segment of eye, incisional technique (with or without injection of air or liquid) (separate procedure); posterior synechiae                                                                                                                     | Severing adhesions of anterior segment of eye           |
| 65870     | Severing adhesions of anterior segment of eye, incisional technique (with or without injection of air or liquid) (separate procedure); anterior synechiae, except goniosynechiae                                                                                               | Severing adhesions of anterior segment of eye           |

| Continued |                                                                                                                                                                                                                                                                                      |                                                                                                      |
|-----------|--------------------------------------------------------------------------------------------------------------------------------------------------------------------------------------------------------------------------------------------------------------------------------------|------------------------------------------------------------------------------------------------------|
| Code      | Code description                                                                                                                                                                                                                                                                     | Procedure type                                                                                       |
| 65865     | Severing adhesions of anterior segment of eye, incisional technique (with or without injection of air or liquid) (separate procedure); goniosynechia                                                                                                                                 | Severing adhesions of anterior segment of eye                                                        |
| 65860     | Severing adhesions of anterior segment, laser technique (separate procedure)                                                                                                                                                                                                         | Severing adhesions of anterior segment of eye, laser                                                 |
| 23020     | Capsular contracture release (eg, Sever type procedure)                                                                                                                                                                                                                              | Shoulder contracture release                                                                         |
| 33755     | Shunt; ascending aorta to pulmonary artery (Waterston type operation)                                                                                                                                                                                                                | Shunt; ascending aorta to pulmonary artery (Waterston type operation)                                |
| 33764     | Shunt; central, with prosthetic graft                                                                                                                                                                                                                                                | Shunt; central, with prosthetic graft                                                                |
| 33762     | Shunt; descending aorta to pulmonary artery (Potts-Smith type operation)                                                                                                                                                                                                             | Shunt; descending aorta to pulmonary artery (Potts-Smith type operation)                             |
| 33750     | Shunt; subclavian to pulmonary artery (Blalock-Taussig type operation)                                                                                                                                                                                                               | Shunt; subclavian to pulmonary artery (Blalock-Taussig type operation)                               |
| 33766     | Shunt; superior vena cava to pulmonary artery for flow to 1 lung (classical Glenn procedure)                                                                                                                                                                                         | Shunt; superior vena cava to pulmonary artery for flow to 1 lung (classical Glenn procedure)         |
| 33767     | Shunt; superior vena cava to pulmonary artery for flow to both lungs (bidirectional Glenn procedure)                                                                                                                                                                                 | Shunt; superior vena cava to pulmonary artery for flow to both lungs (bidirectional Glenn procedure) |
| 42340     | Sialolithotomy; parotid, extraoral or complicated intraoral                                                                                                                                                                                                                          | Sialolithotomy                                                                                       |
| 42335     | Sialolithotomy; submandibular (submaxillary), complicated, intraoral                                                                                                                                                                                                                 | Sialolithotomy                                                                                       |
| 31087     | Sinusotomy frontal; nonobliterative, with osteoplastic flap, coronal incision                                                                                                                                                                                                        | Sinusotomy, with or without reconstruction                                                           |
| 31086     | Sinusotomy frontal; nonobliterative, with osteoplastic flap, brow incision                                                                                                                                                                                                           | Sinusotomy, with or without reconstruction                                                           |
| 31085     | Sinusotomy frontal; obliterative, with osteoplastic flap, coronal incision                                                                                                                                                                                                           | Sinusotomy, with or without reconstruction                                                           |
| 31084     | Sinusotomy frontal; obliterative, with osteoplastic flap, brow incision                                                                                                                                                                                                              | Sinusotomy, with or without reconstruction                                                           |
| 31090     | Sinusotomy, unilateral, 3 or more paranasal sinuses (frontal, maxillary, ethmoid, sphenoid)                                                                                                                                                                                          | Sinusotomy, with or without reconstruction                                                           |
| 31081     | Sinusotomy frontal; obliterative, without osteoplastic flap, coronal incision (includes ablation)                                                                                                                                                                                    | Sinusotomy, with or without reconstruction                                                           |
| 31080     | Sinusotomy frontal; obliterative without osteoplastic flap, brow incision (includes ablation)                                                                                                                                                                                        | Sinusotomy, with or without reconstruction                                                           |
| 31075     | Sinusotomy frontal; transorbital, unilateral (for mucocele or osteoma, Lynch type)                                                                                                                                                                                                   | Sinusotomy, with or without reconstruction                                                           |
| 31070     | Sinusotomy frontal; external, simple (trephine operation)                                                                                                                                                                                                                            | Sinusotomy, with or without reconstruction                                                           |
| 15277     | Application of skin substitute graft to face, scalp, eyelids, mouth, neck, ears, orbits, genitalia, hands, feet, and/or multiple digits, total wound surface area greater than or equal to 100 sq cm; first 100 sq cm wound surface area, or 1% of body area of infants and children | Skin graft                                                                                           |
| 15275     | Application of skin substitute graft to face, scalp, eyelids, mouth, neck, ears, orbits, genitalia, hands, feet, and/or multiple digits, total wound surface area up to 100 sq cm; first 25 sq cm or less wound surface area                                                         | Skin graft                                                                                           |
| 15273     | Application of skin substitute graft to trunk, arms, legs, total wound surface area greater than or equal to 100 sq cm; first 100 sq cm wound surface area, or 1% of body area of infants and children                                                                               | Skin graft                                                                                           |
| 15271     | Application of skin substitute graft to trunk, arms, legs, total wound surface area up to 100 sq cm; first 25 sq cm or less wound surface area                                                                                                                                       | Skin graft                                                                                           |
| 15260     | Full thickness graft, free, including direct closure of donor site, nose, ears, eyelids, and/or lips; 20 sq cm or less                                                                                                                                                               | Skin graft                                                                                           |
| 15240     | Full thickness graft, free, including direct closure of donor site, forehead, cheeks, chin, mouth, neck, axillae, genitalia, hands, and/or feet; 20 sq cm or less                                                                                                                    | Skin graft                                                                                           |
| 15220     | Full thickness graft, free, including direct closure of donor site, scalp, arms, and/or legs; 20 sq cm or less                                                                                                                                                                       | Skin graft                                                                                           |
| 15200     | Full thickness graft, free, including direct closure of donor site, trunk; 20 sq cm or less                                                                                                                                                                                          | Skin graft                                                                                           |
| 15155     | Tissue cultured skin autograft, face, scalp, eyelids, mouth, neck, ears, orbits, genitalia, hands, feet, and/or multiple digits; first 25 sq cm or less                                                                                                                              | Skin graft                                                                                           |
| 15150     | Tissue cultured skin autograft, trunk, arms, legs; first 25 sq cm or less                                                                                                                                                                                                            | Skin graft                                                                                           |
| 15135     | Dermal autograft, face, scalp, eyelids, mouth, neck, ears, orbits, genitalia, hands, feet, and/or multiple digits; first 100 sq cm or less, or 1% of body area of infants and children                                                                                               | Skin graft                                                                                           |
| 15130     | Dermal autograft, trunk, arms, legs; first 100 sq cm or less, or 1% of body area of infants and children                                                                                                                                                                             | Skin graft                                                                                           |
| 15120     | Split-thickness autograft, face, scalp, eyelids, mouth, neck, ears, orbits, genitalia, hands, feet, and/or multiple digits; first 100 sq cm or less, or 1% of body area of infants and children (except 15050)                                                                       | Skin graft                                                                                           |

| Continued |                                                                                                                                                                                                                                      |                                                                                                                                |
|-----------|--------------------------------------------------------------------------------------------------------------------------------------------------------------------------------------------------------------------------------------|--------------------------------------------------------------------------------------------------------------------------------|
| Code      | Code description                                                                                                                                                                                                                     | Procedure type                                                                                                                 |
| 15115     | Epidermal autograft, face, scalp, eyelids, mouth, neck, ears, orbits, genitalia, hands, feet, and/or multiple digits; first 100 sq cm or less, or 1% of body area of infants and children                                            | Skin graft                                                                                                                     |
| 15110     | Epidermal autograft, trunk, arms, legs; first 100 sq cm or less, or 1% of body area of infants and children                                                                                                                          | Skin graft                                                                                                                     |
| 15100     | Split-thickness autograft, trunk, arms, legs; first 100 sq cm or less, or 1% of body area of infants and children (except 15050)                                                                                                     | Skin graft                                                                                                                     |
| 15050     | Pinch graft, single or multiple, to cover small ulcer, tip of digit, or other minimal open area (except on face), up to defect size 2 cm diameter                                                                                    | Skin graft                                                                                                                     |
| 53440     | Sling operation for correction of male urinary incontinence (eg, fascia or synthetic)                                                                                                                                                | Sling operation for correction of male urinary incontinence                                                                    |
| 57288     | Sling operation for stress incontinence (eg, fascia or synthetic)                                                                                                                                                                    | Sling operation for stress incontinence                                                                                        |
| 46762     | Sphincteroplasty, anal, for incontinence, adult; implantation artificial sphincter                                                                                                                                                   | Sphincteroplasty, anal                                                                                                         |
| 46761     | Sphincteroplasty, anal, for incontinence, adult; levator muscle imbrication (Park posterior anal repair)                                                                                                                             | Sphincteroplasty, anal                                                                                                         |
| 46760     | Sphincteroplasty, anal, for incontinence, adult; muscle transplant                                                                                                                                                                   | Sphincteroplasty, anal                                                                                                         |
| 46751     | Sphincteroplasty, anal, for incontinence or prolapse; child                                                                                                                                                                          | Sphincteroplasty, anal                                                                                                         |
| 46750     | Sphincteroplasty, anal, for incontinence or prolapse; adult                                                                                                                                                                          | Sphincteroplasty, anal                                                                                                         |
| 46080     | Sphincterotomy, anal, division of sphincter (separate procedure)                                                                                                                                                                     | Sphincteroplasty, anal                                                                                                         |
| 22114     | Partial excision of vertebral body, for intrinsic bony lesion, without decompression of spinal cord or nerve root(s), single vertebral segment; lumbar                                                                               | Spine bony resection                                                                                                           |
| 22112     | Partial excision of vertebral body, for intrinsic bony lesion, without decompression of spinal cord or nerve root(s), single vertebral segment; thoracic                                                                             | Spine bony resection                                                                                                           |
| 22110     | Partial excision of vertebral body, for intrinsic bony lesion, without decompression of spinal cord or nerve root(s), single vertebral segment; cervical                                                                             | Spine bony resection                                                                                                           |
| 22102     | Partial excision of posterior vertebral component (eg, spinous process, lamina or facet) for intrinsic bony lesion, single vertebral segment; lumbar                                                                                 | Spine bony resection                                                                                                           |
| 22101     | Partial excision of posterior vertebral component (eg, spinous process, lamina or facet) for intrinsic bony lesion, single vertebral segment; thoracic                                                                               | Spine bony resection                                                                                                           |
| 22100     | Partial excision of posterior vertebral component (eg, spinous process, lamina or facet) for intrinsic bony lesion, single vertebral segment; cervical                                                                               | Spine bony resection                                                                                                           |
| 38120     | Laparoscopy, surgical, splenectomy                                                                                                                                                                                                   | Splenectomy - laparoscopic                                                                                                     |
| 38101     | Splenectomy; partial (separate procedure)                                                                                                                                                                                            | Splenectomy - open                                                                                                             |
| 38100     | Splenectomy; total (separate procedure)                                                                                                                                                                                              | Splenectomy - open                                                                                                             |
| 38115     | Repair of ruptured spleen (splenorrhaphy) with or without partial splenectomy                                                                                                                                                        | Splenorrhaphy                                                                                                                  |
| 49220     | Staging laparotomy for Hodgkins disease or lymphoma (includes splenectomy, needle or open biopsies of both liver lobes, possibly also removal of abdominal nodes, abdominal node and/or bone marrow biopsies, ovarian repositioning) | Staging laparotomy for Hodgkins disease or lymphoma                                                                            |
| 69661     | Stapedectomy or stapedotomy with reestablishment of ossicular continuity, with or without use of foreign material; with footplate drill out                                                                                          | Stapedectomy or stapedotomy                                                                                                    |
| 69660     | Stapedectomy or stapedotomy with reestablishment of ossicular continuity, with or without use of foreign material;                                                                                                                   | Stapedectomy or stapedotomy                                                                                                    |
| 69650     | Stapes mobilization                                                                                                                                                                                                                  | Stapes mobilization                                                                                                            |
| 61751     | Stereotactic biopsy, aspiration, or excision, including burr hole(s), for intracranial lesion; with computed tomography and/or magnetic resonance guidance                                                                           | Stereotactic biopsy, aspiration, or excision, including burr hole(s), for intracranial lesion                                  |
| 61750     | Stereotactic biopsy, aspiration, or excision, including burr hole(s), for intracranial lesion;                                                                                                                                       | Stereotactic biopsy, aspiration, or excision, including burr hole(s), for intracranial lesion                                  |
| 61760     | Stereotactic implantation of depth electrodes into the cerebrum for long- term seizure monitoring                                                                                                                                    | Stereotactic implantation of depth electrodes into the cerebrum for long-term seizure monitoring                               |
| 61770     | Stereotactic localization, including burr hole(s), with insertion of catheter(s) or probe(s) for placement of radiation source                                                                                                       | Stereotactic localization, including burr hole(s), with insertion of catheter(s) or probe(s) for placement of radiation source |
| 21632     | Radical resection of sternum; with mediastinal lymphadenectomy                                                                                                                                                                       | Sternal ostectomy, debridement, resection                                                                                      |
| 21630     | Radical resection of sternum;                                                                                                                                                                                                        | Sternal ostectomy, debridement, resection                                                                                      |

| Continued |                                                                                                                                                                               |                                                                                                                       |
|-----------|-------------------------------------------------------------------------------------------------------------------------------------------------------------------------------|-----------------------------------------------------------------------------------------------------------------------|
| Code      | Code description                                                                                                                                                              | Procedure type                                                                                                        |
| 21627     | Sternal debridement                                                                                                                                                           | Sternal ostectomy, debridement, resection                                                                             |
| 21620     | Ostectomy of sternum, partial                                                                                                                                                 | Sternal ostectomy, debridement, resection                                                                             |
| 67318     | Strabismus surgery, any procedure, superior oblique muscle                                                                                                                    | Strabismus surgery                                                                                                    |
| 67316     | Strabismus surgery, recession or resection procedure; 2 or more vertical muscles (excluding superior oblique)                                                                 | Strabismus surgery                                                                                                    |
| 67314     | Strabismus surgery, recession or resection procedure; 1 vertical muscle (excluding superior oblique)                                                                          | Strabismus surgery                                                                                                    |
| 67312     | Strabismus surgery, recession or resection procedure; 2 horizontal muscles                                                                                                    | Strabismus surgery                                                                                                    |
| 67311     | Strabismus surgery, recession or resection procedure; 1 horizontal muscle                                                                                                     | Strabismus surgery                                                                                                    |
| 24935     | Stump elongation, upper extremity                                                                                                                                             | Stump elongation, upper extremity                                                                                     |
| 61531     | Subdural implantation of strip electrodes through 1 or more burr or trephine hole(s) for long-term seizure monitoring                                                         | Subdural implantation of strip electrodes through 1 or more burr or trephine hole(s) for long-term seizure monitoring |
| 61340     | Subtemporal cranial decompression (pseudotumor cerebri, slit ventricle syndrome)                                                                                              | Subtemporal cranial decompression (pseudotumor cerebri, slit ventricle syndrome)                                      |
| 31825     | Surgical closure tracheostomy or fistula; with plastic repair                                                                                                                 | Surgical closure tracheostomy or fistula, with or without plastic repair                                              |
| 31820     | Surgical closure tracheostomy or fistula; without plastic repair                                                                                                              | Surgical closure tracheostomy or fistula, with or without plastic repair                                              |
| 59830     | Treatment of septic abortion, completed surgically                                                                                                                            | Surgical treatment of abortion                                                                                        |
| 46288     | Closure of anal fistula with rectal advancement flap                                                                                                                          | Surgical treatment of anal fistula                                                                                    |
| 46285     | Surgical treatment of anal fistula (fistulectomy/fistulotomy); second stage                                                                                                   | Surgical treatment of anal fistula                                                                                    |
| 46280     | Surgical treatment of anal fistula (fistulectomy/fistulotomy); transsphincteric, suprasphincteric, extrasphincteric or multiple, including placement of seton, when performed | Surgical treatment of anal fistula                                                                                    |
| 46275     | Surgical treatment of anal fistula (fistulectomy/fistulotomy); intersphincteric                                                                                               | Surgical treatment of anal fistula                                                                                    |
| 33548     | Surgical ventricular restoration procedure, includes prosthetic patch, when performed (eg, ventricular remodeling, SVR, SAVER, Dor procedures)                                | Surgical ventricular restoration procedure                                                                            |
| 38382     | Suture and/or ligation of thoracic duct; abdominal approach                                                                                                                   | Suture and/or ligation of thoracic duct                                                                               |
| 38380     | Suture and/or ligation of thoracic duct; cervical approach                                                                                                                    | Suture and/or ligation of thoracic duct                                                                               |
| 38381     | Suture and/or ligation of thoracic duct; thoracic approach                                                                                                                    | Suture and/or ligation of thoracic duct                                                                               |
| 43410     | Suture of esophageal wound or injury; cervical approach                                                                                                                       | Suture of esophageal wound or injury                                                                                  |
| 43415     | Suture of esophageal wound or injury; transthoracic or transabdominal approach                                                                                                | Suture of esophageal wound or injury                                                                                  |
| 47900     | Suture of extrahepatic biliary duct for pre-existing injury (separate procedure)                                                                                              | Suture of extrahepatic biliary duct for pre-existing injury                                                           |
| 27381     | Suture of infrapatellar tendon; secondary reconstruction, including fascial or tendon graft                                                                                   | Suture of infrapatellar tendon                                                                                        |
| 27380     | Suture of infrapatellar tendon; primary                                                                                                                                       | Suture of infrapatellar tendon                                                                                        |
| 66682     | Suture of iris, ciliary body (separate procedure) with retrieval of suture through small incision (eg, McCannel suture)                                                       | Suture of iris, ciliary body                                                                                          |
| 44850     | Suture of mesentery (separate procedure)                                                                                                                                      | Suture of mesentery                                                                                                   |
| 27386     | Suture of quadriceps or hamstring muscle rupture; secondary reconstruction, including fascial or tendon graft                                                                 | Suture of quadriceps or hamstring muscle rupture                                                                      |
| 27385     | Suture of quadriceps or hamstring muscle rupture; primary                                                                                                                     | Suture of quadriceps or hamstring muscle rupture                                                                      |
| 41510     | Suture of tongue to lip for micrognathia (Douglas type procedure)                                                                                                             | Suture of tongue to lip for micrognathia                                                                              |
| 31800     | Suture of tracheal wound or injury; cervical                                                                                                                                  | Suture of tracheal wound or injury                                                                                    |
| 31805     | Suture of tracheal wound or injury; intrathoracic                                                                                                                             | Suture of tracheal wound or injury                                                                                    |
| 54670     | Suture or repair of testicular injury                                                                                                                                         | Suture or repair of testicular injury                                                                                 |
| 64804     | Sympathectomy, cervicothoracic                                                                                                                                                | Sympathectomy                                                                                                         |
| 64802     | Sympathectomy, cervical                                                                                                                                                       | Sympathectomy                                                                                                         |
| 64823     | Sympathectomy; superficial palmar arch                                                                                                                                        | Sympathectomy                                                                                                         |
| 64822     | Sympathectomy; ulnar artery                                                                                                                                                   | Sympathectomy                                                                                                         |
| 64821     | Sympathectomy; radial artery                                                                                                                                                  | Sympathectomy                                                                                                         |
| 64820     | Sympathectomy; digital arteries, each digit                                                                                                                                   | Sympathectomy                                                                                                         |
| 64818     | Sympathectomy, lumbar                                                                                                                                                         | Sympathectomy                                                                                                         |

| Continued |                                                                                                                                                |                                                   |
|-----------|------------------------------------------------------------------------------------------------------------------------------------------------|---------------------------------------------------|
| Code      | Code description                                                                                                                               | Procedure type                                    |
| 64809     | Sympathectomy, thoracolumbar                                                                                                                   | Sympathectomy                                     |
| 50540     | Symphysiotomy for horseshoe kidney with or without pyeloplasty and/or other plastic procedure, unilateral or bilateral (1 operation)           | Symphysiotomy for horseshoe kidney                |
| 28280     | Syndactylization, toes (eg, webbing or Kelikian type procedure)                                                                                | Syndactylization, toes                            |
| 28088     | Synovectomy, tendon sheath, foot; extensor                                                                                                     | Synovectomy, foot                                 |
| 28086     | Synovectomy, tendon sheath, foot; flexor                                                                                                       | Synovectomy, foot                                 |
| 28072     | Synovectomy; metatarsophalangeal joint, each                                                                                                   | Synovectomy, foot                                 |
| 28070     | Synovectomy; intertarsal or tarsometatarsal joint, each                                                                                        | Synovectomy, foot                                 |
| 26145     | Synovectomy, tendon sheath, radical (tenosynovectomy), flexor tendon, palm and/or finger, each tendon                                          | Synovectomy, hand                                 |
| 26140     | Synovectomy, proximal interphalangeal joint, including extensor reconstruction, each interphalangeal joint                                     | Synovectomy, hand                                 |
| 26135     | Synovectomy, metacarpophalangeal joint including intrinsic release and extensor hood reconstruction, each digit                                | Synovectomy, hand                                 |
| 26130     | Synovectomy, carpometacarpal joint                                                                                                             | Synovectomy, hand                                 |
| 25118     | Synovectomy, extensor tendon sheath, wrist, single compartment;                                                                                | Synovectomy, hand                                 |
| 25119     | Synovectomy, extensor tendon sheath, wrist, single compartment; with resection of distal ulna                                                  | Synovectomy, hand                                 |
| 28035     | Release, tarsal tunnel (posterior tibial nerve decompression)                                                                                  | Tarsal tunnel release                             |
| 67875     | Temporary closure of eyelids by suture (eg, Frost suture)                                                                                      | Temporary closure of eyelids by suture            |
| 20924     | Tendon graft, from a distance (eg, palmaris, toe extensor, plantaris)                                                                          | Tendon graft harvest                              |
| 27686     | Lengthening or shortening of tendon, leg or ankle; multiple tendons (through same incision), each                                              | Tendon lengthening or shortening, lower extremity |
| 27685     | Lengthening or shortening of tendon, leg or ankle; single tendon (separate procedure)                                                          | Tendon lengthening or shortening, lower extremity |
| 25280     | Lengthening or shortening of flexor or extensor tendon, forearm and/or wrist, single, each tendon                                              | Tendon lengthening or shortening, upper extremity |
| 26479     | Shortening of tendon, flexor, hand or finger, each tendon                                                                                      | Tendon lengthening or shortening, upper extremity |
| 26478     | Lengthening of tendon, flexor, hand or finger, each tendon                                                                                     | Tendon lengthening or shortening, upper extremity |
| 26477     | Shortening of tendon, extensor, hand or finger, each tendon                                                                                    | Tendon lengthening or shortening, upper extremity |
| 26476     | Lengthening of tendon, extensor, hand or finger, each tendon                                                                                   | Tendon lengthening or shortening, upper extremity |
| 24305     | Tendon lengthening, upper arm or elbow, each tendon                                                                                            | Tendon lengthening or shortening, upper extremity |
| 28210     | Repair, tendon, extensor, foot; secondary with free graft, each tendon (includes obtaining graft)                                              | Tendon repair, lower extremity                    |
| 28208     | Repair, tendon, extensor, foot; primary or secondary, each tendon                                                                              | Tendon repair, lower extremity                    |
| 28202     | Repair, tendon, flexor, foot; secondary with free graft, each tendon (includes obtaining graft)                                                | Tendon repair, lower extremity                    |
| 28200     | Repair, tendon, flexor, foot; primary or secondary, without free graft, each tendon                                                            | Tendon repair, lower extremity                    |
| 27676     | Repair, dislocating peroneal tendons; with fibular osteotomy                                                                                   | Tendon repair, lower extremity                    |
| 27675     | Repair, dislocating peroneal tendons; without fibular osteotomy                                                                                | Tendon repair, lower extremity                    |
| 27665     | Repair, extensor tendon, leg; secondary, with or without graft, each tendon                                                                    | Tendon repair, lower extremity                    |
| 27664     | Repair, extensor tendon, leg; primary, without graft, each tendon                                                                              | Tendon repair, lower extremity                    |
| 27659     | Repair, flexor tendon, leg; secondary, with or without graft, each tendon                                                                      | Tendon repair, lower extremity                    |
| 27658     | Repair, flexor tendon, leg; primary, without graft, each tendon                                                                                | Tendon repair, lower extremity                    |
| 25275     | Repair, tendon sheath, extensor, forearm and/or wrist, with free graft (includes obtaining graft) (eg, for extensor carpi ulnaris subluxation) | Tendon repair, upper extremity                    |
| 25274     | Repair, tendon or muscle, extensor, forearm and/or wrist; secondary, with free graft (includes obtaining graft), each tendon or muscle         | Tendon repair, upper extremity                    |
| 25272     | Repair, tendon or muscle, extensor, forearm and/or wrist; secondary, single, each tendon or muscle                                             | Tendon repair, upper extremity                    |
| 25270     | Repair, tendon or muscle, extensor, forearm and/or wrist; primary, single, each tendon or muscle                                               | Tendon repair, upper extremity                    |
| 25265     | Repair, tendon or muscle, flexor, forearm and/or wrist; secondary, with free graft (includes obtaining graft), each tendon or muscle           | Tendon repair, upper extremity                    |

| Continued |                                                                                                                                                                                                                                                       |                                  |
|-----------|-------------------------------------------------------------------------------------------------------------------------------------------------------------------------------------------------------------------------------------------------------|----------------------------------|
| Code      | Code description                                                                                                                                                                                                                                      | Procedure type                   |
| 25263     | Repair, tendon or muscle, flexor, forearm and/or wrist; secondary, single, each tendon or muscle                                                                                                                                                      | Tendon repair, upper extremity   |
| 25260     | Repair, tendon or muscle, flexor, forearm and/or wrist; primary, single, each tendon or muscle                                                                                                                                                        | Tendon repair, upper extremity   |
| 26434     | Repair of extensor tendon, distal insertion, primary or secondary; with free graft (includes obtaining graft)                                                                                                                                         | Tendon repair, upper extremity   |
| 26433     | Repair of extensor tendon, distal insertion, primary or secondary; without graft (eg, mallet finger)                                                                                                                                                  | Tendon repair, upper extremity   |
| 26428     | Repair of extensor tendon, central slip, secondary (eg, boutonniere deformity); with free graft (includes obtaining graft), each finger                                                                                                               | Tendon repair, upper extremity   |
| 26426     | Repair of extensor tendon, central slip, secondary (eg, boutonniere deformity); using local tissue(s), including lateral band(s), each finger                                                                                                         | Tendon repair, upper extremity   |
| 26420     | Repair, extensor tendon, finger, primary or secondary; with free graft (includes obtaining graft) each tendon                                                                                                                                         | Tendon repair, upper extremity   |
| 26418     | Repair, extensor tendon, finger, primary or secondary; without free graft, each tendon                                                                                                                                                                | Tendon repair, upper extremity   |
| 26412     | Repair, extensor tendon, hand, primary or secondary; with free graft (includes obtaining graft), each tendon                                                                                                                                          | Tendon repair, upper extremity   |
| 26410     | Repair, extensor tendon, hand, primary or secondary; without free graft, each tendon                                                                                                                                                                  | Tendon repair, upper extremity   |
| 24341     | Repair, tendon or muscle, upper arm or elbow, each tendon or muscle, primary or secondary (excludes rotator cuff)                                                                                                                                     | Tendon repair, upper extremity   |
| 27691     | Transfer or transplant of single tendon (with muscle redirection or rerouting); deep (eg, anterior tibial or posterior tibial through interosseous space, flexor digitorum longus, flexor hallucis longus, or peroneal tendon to midfoot or hindfoot) | Tendon transfer, lower extremity |
| 27690     | Transfer or transplant of single tendon (with muscle redirection or rerouting); superficial (eg, anterior tibial extensors into midfoot)                                                                                                              | Tendon transfer, lower extremity |
| 27397     | Transplant or transfer (with muscle redirection or rerouting), thigh (eg, extensor to flexor); multiple tendons                                                                                                                                       | Tendon transfer, lower extremity |
| 27396     | Transplant or transfer (with muscle redirection or rerouting), thigh (eg, extensor to flexor); single tendon                                                                                                                                          | Tendon transfer, lower extremity |
| 26496     | Opponensplasty; other methods                                                                                                                                                                                                                         | Tendon transfer, upper extremity |
| 26494     | Opponensplasty; hypothenar muscle transfer                                                                                                                                                                                                            | Tendon transfer, upper extremity |
| 26492     | Opponensplasty; tendon transfer with graft (includes obtaining graft), each tendon                                                                                                                                                                    | Tendon transfer, upper extremity |
| 26490     | Opponensplasty; superficialis tendon transfer type, each tendon                                                                                                                                                                                       | Tendon transfer, upper extremity |
| 25312     | Tendon transplantation or transfer, flexor or extensor, forearm and/or wrist, single; with tendon graft(s) (includes obtaining graft), each tendon                                                                                                    | Tendon transfer, upper extremity |
| 25310     | Tendon transplantation or transfer, flexor or extensor, forearm and/or wrist, single; each tendon                                                                                                                                                     | Tendon transfer, upper extremity |
| 26489     | Transfer or transplant of tendon, palmar; with free tendon graft (includes obtaining graft), each tendon                                                                                                                                              | Tendon transfer, upper extremity |
| 26485     | Transfer or transplant of tendon, palmar; without free tendon graft, each tendon                                                                                                                                                                      | Tendon transfer, upper extremity |
| 26483     | Transfer or transplant of tendon, carpometacarpal area or dorsum of hand; with free tendon graft (includes obtaining graft), each tendon                                                                                                              | Tendon transfer, upper extremity |
| 26480     | Transfer or transplant of tendon, carpometacarpal area or dorsum of hand; without free graft, each tendon                                                                                                                                             | Tendon transfer, upper extremity |
| 24301     | Muscle or tendon transfer; any type, upper arm or elbow, single (excluding 24320-24331)                                                                                                                                                               | Tendon transfer, upper extremity |
| 25301     | Tenodesis at wrist; extensors of fingers                                                                                                                                                                                                              | Tenodesis, hand                  |
| 25300     | Tenodesis at wrist; flexors of fingers                                                                                                                                                                                                                | Tenodesis, hand                  |
| 26474     | Tenodesis; of distal joint, each joint                                                                                                                                                                                                                | Tenodesis, hand                  |
| 26471     | Tenodesis; of proximal interphalangeal joint, each joint                                                                                                                                                                                              | Tenodesis, hand                  |
| 28226     | Tenolysis, extensor, foot; multiple tendons                                                                                                                                                                                                           | Tenolysis, lower extremity       |
| 28225     | Tenolysis, extensor, foot; single tendon                                                                                                                                                                                                              | Tenolysis, lower extremity       |
| 28222     | Tenolysis, flexor, foot; multiple tendons                                                                                                                                                                                                             | Tenolysis, lower extremity       |
| 28220     | Tenolysis, flexor, foot; single tendon                                                                                                                                                                                                                | Tenolysis, lower extremity       |
| 27681     | Tenolysis, flexor or extensor tendon, leg and/or ankle; multiple tendons (through separate incision[s])                                                                                                                                               | Tenolysis, lower extremity       |
| 27680     | Tenolysis, flexor or extensor tendon, leg and/or ankle; single, each tendon                                                                                                                                                                           | Tenolysis, lower extremity       |

| Continued |                                                                                                                                                                                              |                                                                                     |
|-----------|----------------------------------------------------------------------------------------------------------------------------------------------------------------------------------------------|-------------------------------------------------------------------------------------|
| Code      | Code description                                                                                                                                                                             | Procedure type                                                                      |
| 26449     | Tenolysis, complex, extensor tendon, finger, including forearm, each tendon                                                                                                                  | Tenolysis, upper extremity                                                          |
| 26445     | Tenolysis, extensor tendon, hand OR finger, each tendon                                                                                                                                      | Tenolysis, upper extremity                                                          |
| 26442     | Tenolysis, flexor tendon; palm AND finger, each tendon                                                                                                                                       | Tenolysis, upper extremity                                                          |
| 26440     | Tenolysis, flexor tendon; palm OR finger, each tendon                                                                                                                                        | Tenolysis, upper extremity                                                          |
| 25295     | Tenolysis, flexor or extensor tendon, forearm and/or wrist, single, each tendon                                                                                                              | Tenolysis, upper extremity                                                          |
| 24332     | Tenolysis, triceps                                                                                                                                                                           | Tenolysis, upper extremity                                                          |
| 24320     | Tenoplasty, with muscle transfer, with or without free graft, elbow to shoulder, single (Seddon-Brookes type procedure)                                                                      | Tenoplasty with muscle transfer, elbow to shoulder (Seddon- Brookes type procedure) |
| 27392     | Tenotomy - open, hamstring, knee to hip; multiple tendons, bilateral                                                                                                                         | Tenotomy, lower extremity                                                           |
| 27391     | Tenotomy - open, hamstring, knee to hip; multiple tendons, 1 leg                                                                                                                             | Tenotomy, lower extremity                                                           |
| 27390     | Tenotomy - open, hamstring, knee to hip; single tendon                                                                                                                                       | Tenotomy, lower extremity                                                           |
| 28240     | Tenotomy, lengthening, or release, abductor hallucis muscle                                                                                                                                  | Tenotomy, lower extremity                                                           |
| 28234     | Tenotomy - open, extensor, foot or toe, each tendon                                                                                                                                          | Tenotomy, lower extremity                                                           |
| 28232     | Tenotomy - open, tendon flexor; toe, single tendon (separate procedure)                                                                                                                      | Tenotomy, lower extremity                                                           |
| 28230     | Tenotomy - open, tendon flexor; foot, single or multiple tendon(s) (separate procedure)                                                                                                      | Tenotomy, lower extremity                                                           |
| 27006     | Tenotomy, abductors and/or extensor(s) of hip - open (separate procedure)                                                                                                                    | Tenotomy, lower extremity                                                           |
| 27005     | Tenotomy, hip flexor(s) - open (separate procedure)                                                                                                                                          | Tenotomy, lower extremity                                                           |
| 27003     | Tenotomy, adductor, subcutaneous - open, with obturator neurectomy                                                                                                                           | Tenotomy, lower extremity                                                           |
| 27001     | Tenotomy, adductor of hip - open                                                                                                                                                             | Tenotomy, lower extremity                                                           |
| 27000     | Tenotomy, adductor of hip, percutaneous (separate procedure)                                                                                                                                 | Tenotomy, lower extremity                                                           |
| 28011     | Tenotomy, percutaneous, toe; multiple tendons                                                                                                                                                | Tenotomy, lower extremity                                                           |
| 28010     | Tenotomy, percutaneous, toe; single tendon                                                                                                                                                   | Tenotomy, lower extremity                                                           |
| 27606     | Tenotomy, percutaneous, Achilles tendon (separate procedure); general anesthesia                                                                                                             | Tenotomy, lower extremity                                                           |
| 27605     | Tenotomy, percutaneous, Achilles tendon (separate procedure); local anesthesia                                                                                                               | Tenotomy, lower extremity                                                           |
| 24310     | Tenotomy - open, elbow to shoulder, each tendon                                                                                                                                              | Tenotomy, upper extremity                                                           |
| 25290     | Tenotomy - open, flexor or extensor tendon, forearm and/or wrist, single, each tendon                                                                                                        | Tenotomy, upper extremity                                                           |
| 24359     | Tenotomy, elbow, lateral or medial (eg, epicondylitis, tennis elbow, golfer's elbow); debridement, soft tissue and/or bone - open with tendon repair or reattachment                         | Tenotomy, upper extremity                                                           |
| 24358     | Tenotomy, elbow, lateral or medial (eg, epicondylitis, tennis elbow, golfer's elbow); debridement, soft tissue and/or bone - open                                                            | Tenotomy, upper extremity                                                           |
| 26460     | Tenotomy, extensor, hand or finger - open, each tendon                                                                                                                                       | Tenotomy, upper extremity                                                           |
| 26455     | Tenotomy, flexor, finger - open, each tendon                                                                                                                                                 | Tenotomy, upper extremity                                                           |
| 26450     | Tenotomy, flexor, palm - open, each tendon                                                                                                                                                   | Tenotomy, upper extremity                                                           |
| 23406     | Tenotomy, shoulder area; multiple tendons through same incision                                                                                                                              | Tenotomy, upper extremity                                                           |
| 23405     | Tenotomy, shoulder area; single tendon                                                                                                                                                       | Tenotomy, upper extremity                                                           |
| 33692     | Complete repair tetralogy of Fallot without pulmonary atresia;                                                                                                                               | Tetralogy of Fallot repair                                                          |
| 33694     | Complete repair tetralogy of Fallot without pulmonary atresia; with transannular patch                                                                                                       | Tetralogy of Fallot repair                                                          |
| 33697     | Complete repair tetralogy of Fallot with pulmonary atresia including construction of conduit from right ventricle to pulmonary artery and closure of ventricular septal defect               | Tetralogy of Fallot repair                                                          |
| 32906     | Thoracoplasty, Schede type or extrapleural (all stages); with closure of bronchopleural fistula                                                                                              | Thoracoplasty, Schede type or extrapleural                                          |
| 32905     | Thoracoplasty, Schede type or extrapleural (all stages);                                                                                                                                     | Thoracoplasty, Schede type or extrapleural                                          |
| 32654     | Thoracoscopy, surgical; with control of traumatic hemorrhage                                                                                                                                 | Thoracoscopy, control of hemorrhage                                                 |
| 32659     | Thoracoscopy, surgical; with creation of pericardial window or partial resection of pericardial sac for drainage                                                                             | Thoracoscopy, creation of pericardial window                                        |
| 32658     | Thoracoscopy, surgical; with removal of clot or foreign body from pericardial sac                                                                                                            | Thoracoscopy, evacuation of pericardium                                             |
| 32662     | Thoracoscopy, surgical; with excision of mediastinal cyst, tumor, or mass                                                                                                                    | Thoracoscopy, excision of pericardial or mediastinal mass                           |
| 32661     | Thoracoscopy, surgical; with excision of pericardial cyst, tumor, or mass                                                                                                                    | Thoracoscopy, excision of pericardial or mediastinal mass                           |
| 32665     | Thoracoscopy, surgical; with esophagomyotomy (Heller type)                                                                                                                                   | Thoracoscopy, with esophagomyotomy                                                  |
| 32672     | Thoracoscopy, surgical; with resection-plication for emphysematous lung (bullous or non-bullous) for lung volume reduction (LVRS), unilateral includes any pleural procedure, when performed | Thoracoscopy, with partial or complete lung removal                                 |

| Continued |                                                                                                                                                                                                                                                                   |                                                                                                |
|-----------|-------------------------------------------------------------------------------------------------------------------------------------------------------------------------------------------------------------------------------------------------------------------|------------------------------------------------------------------------------------------------|
| Code      | Code description                                                                                                                                                                                                                                                  | Procedure type                                                                                 |
| 32671     | Thoracoscopy, surgical; with removal of lung (pneumonectomy)                                                                                                                                                                                                      | Thoracoscopy, with partial or complete lung removal                                            |
| 32670     | Thoracoscopy, surgical; with removal of 2 lobes (bilobectomy)                                                                                                                                                                                                     | Thoracoscopy, with partial or complete lung removal                                            |
| 32669     | Thoracoscopy, surgical; with removal of a single lung segment (segmentectomy)                                                                                                                                                                                     | Thoracoscopy, with partial or complete lung removal                                            |
| 32666     | Thoracoscopy, surgical; with therapeutic wedge resection (eg, mass, nodule), initial unilateral                                                                                                                                                                   | Thoracoscopy, with partial or complete lung removal                                            |
| 32663     | Thoracoscopy, surgical; with lobectomy (single lobe)                                                                                                                                                                                                              | Thoracoscopy, with partial or complete lung removal                                            |
| 32656     | Thoracoscopy, surgical; with parietal pleurectomy                                                                                                                                                                                                                 | Thoracoscopy, with pleurectomy                                                                 |
| 32655     | Thoracoscopy, surgical; with resection-plication of bullae, includes any pleural procedure when performed                                                                                                                                                         | Thoracoscopy, with pleurodesis                                                                 |
| 32650     | Thoracoscopy, surgical; with pleurodesis (eg, mechanical or chemical)                                                                                                                                                                                             | Thoracoscopy, with pleurodesis                                                                 |
| 32652     | Thoracoscopy, surgical; with total pulmonary decortication, including intrapleural pneumonolysis                                                                                                                                                                  | Thoracoscopy, with pulmonary decortication                                                     |
| 32651     | Thoracoscopy, surgical; with partial pulmonary decortication                                                                                                                                                                                                      | Thoracoscopy, with pulmonary decortication                                                     |
| 32664     | Thoracoscopy, surgical; with thoracic sympathectomy                                                                                                                                                                                                               | Thoracoscopy, with sympathectomy                                                               |
| 32673     | Thoracoscopy, surgical; with resection of thymus, unilateral or bilateral                                                                                                                                                                                         | Thoracoscopy, with thymectomy                                                                  |
| 32036     | Thoracostomy; with open flap drainage for empyema                                                                                                                                                                                                                 | Thoracostomy, chest drainage with rib resection or flap                                        |
| 32035     | Thoracostomy; with rib resection for empyema                                                                                                                                                                                                                      | Thoracostomy, chest drainage with rib resection or flap                                        |
| 32120     | Thoracotomy; for postoperative complications                                                                                                                                                                                                                      | Thoracotomy, for postoperative complications                                                   |
| 32160     | Thoracotomy; with cardiac massage                                                                                                                                                                                                                                 | Thoracotomy, with cardiac massage                                                              |
| 32110     | Thoracotomy; with control of traumatic hemorrhage and/or repair of lung tear                                                                                                                                                                                      | Thoracotomy, with control of traumatic hemorrhage and/or repair of lung tear                   |
| 32151     | Thoracotomy; with removal of intrapulmonary foreign body                                                                                                                                                                                                          | Thoracotomy, with cyst, mass, or foreign body removal                                          |
| 32140     | Thoracotomy; with cyst(s) removal, includes pleural procedure when performed                                                                                                                                                                                      | Thoracotomy, with cyst, mass, or foreign body removal                                          |
| 32100     | Thoracotomy; with exploration                                                                                                                                                                                                                                     | Thoracotomy, with exploration                                                                  |
| 32124     | Thoracotomy; with open intrapleural pneumonolysis                                                                                                                                                                                                                 | Thoracotomy, with open intrapleural pneumonolysis                                              |
| 32320     | Decortication and parietal pleurectomy                                                                                                                                                                                                                            | Thoracotomy, with pulmonary decortication                                                      |
| 32310     | Pleurectomy, parietal (separate procedure)                                                                                                                                                                                                                        | Thoracotomy, with pulmonary decortication                                                      |
| 32225     | Decortication, pulmonary (separate procedure); partial                                                                                                                                                                                                            | Thoracotomy, with pulmonary decortication                                                      |
| 32220     | Decortication, pulmonary (separate procedure); total                                                                                                                                                                                                              | Thoracotomy, with pulmonary decortication                                                      |
| 32150     | Thoracotomy; with removal of intrapleural foreign body or fibrin deposit                                                                                                                                                                                          | Thoracotomy, with removal of intrapleural foreign body or fibrin deposit                       |
| 32141     | Thoracotomy; with resection-plication of bullae, includes any pleural procedure when performed                                                                                                                                                                    | Thoracotomy, with resection-plication of bullae, includes any pleural procedure when performed |
| 34490     | Thrombectomy, direct or with catheter; axillary and subclavian vein, by arm incision                                                                                                                                                                              | Thrombectomy                                                                                   |
| 34471     | Thrombectomy, direct or with catheter; subclavian vein, by neck incision                                                                                                                                                                                          | Thrombectomy                                                                                   |
| 34401     | Thrombectomy, direct or with catheter; vena cava, iliac vein, by abdominal incision                                                                                                                                                                               | Thrombectomy                                                                                   |
| 34451     | Thrombectomy, direct or with catheter; vena cava, iliac, femoropopliteal vein, by abdominal and leg incision                                                                                                                                                      | Thrombectomy                                                                                   |
| 34421     | Thrombectomy, direct or with catheter; vena cava, iliac, femoropopliteal vein, by leg incision                                                                                                                                                                    | Thrombectomy                                                                                   |
| 35876     | Thrombectomy of arterial or venous graft (other than hemodialysis graft or fistula); with revision of arterial or venous graft                                                                                                                                    | Thrombectomy of arterial or venous graft                                                       |
| 35875     | Thrombectomy of arterial or venous graft (other than hemodialysis graft or fistula);                                                                                                                                                                              | Thrombectomy of arterial or venous graft                                                       |
| 61645     | Percutaneous arterial transluminal mechanical thrombectomy and/or infusion for thrombolysis, intracranial, any method, including diagnostic angiography, fluoroscopic guidance, catheter placement, and intraprocedural pharmacological thrombolytic injection(s) | Thrombectomy or thrombolysis, percutaneous intracranial                                        |
| 35363     | Thromboendarterectomy, including patch graft, if performed; combined aortoiliofemoral                                                                                                                                                                             | Thromboendarterectomy                                                                          |

| Continued |                                                                                                                                                                                                                                                                                                |                                                    |
|-----------|------------------------------------------------------------------------------------------------------------------------------------------------------------------------------------------------------------------------------------------------------------------------------------------------|----------------------------------------------------|
| Code      | Code description                                                                                                                                                                                                                                                                               | Procedure type                                     |
| 35361     | Thromboendarterectomy, including patch graft, if performed; combined aortoiliac                                                                                                                                                                                                                | Thromboendarterectomy                              |
| 35341     | Thromboendarterectomy, including patch graft, if performed; mesenteric, celiac, or renal                                                                                                                                                                                                       | Thromboendarterectomy                              |
| 35331     | Thromboendarterectomy, including patch graft, if performed; abdominal aorta                                                                                                                                                                                                                    | Thromboendarterectomy                              |
| 35301     | Thromboendarterectomy, including patch graft, if performed; carotid, vertebral, subclavian, by neck incision                                                                                                                                                                                   | Thromboendarterectomy                              |
| 35355     | Thromboendarterectomy, including patch graft, if performed; iliofemoral                                                                                                                                                                                                                        | Thromboendarterectomy                              |
| 35351     | Thromboendarterectomy, including patch graft, if performed; iliac                                                                                                                                                                                                                              | Thromboendarterectomy                              |
| 35372     | Thromboendarterectomy, including patch graft, if performed; deep (profunda) femoral                                                                                                                                                                                                            | Thromboendarterectomy                              |
| 35371     | Thromboendarterectomy, including patch graft, if performed; common femoral                                                                                                                                                                                                                     | Thromboendarterectomy                              |
| 35305     | Thromboendarterectomy, including patch graft, if performed; tibial or peroneal artery, initial vessel                                                                                                                                                                                          | Thromboendarterectomy                              |
| 35304     | Thromboendarterectomy, including patch graft, if performed; tibioperoneal trunk artery                                                                                                                                                                                                         | Thromboendarterectomy                              |
| 35303     | Thromboendarterectomy, including patch graft, if performed; popliteal artery                                                                                                                                                                                                                   | Thromboendarterectomy                              |
| 35302     | Thromboendarterectomy, including patch graft, if performed; superficial femoral artery                                                                                                                                                                                                         | Thromboendarterectomy                              |
| 35311     | Thromboendarterectomy, including patch graft, if performed; subclavian, innominate, by thoracic incision                                                                                                                                                                                       | Thromboendarterectomy                              |
| 35321     | Thromboendarterectomy, including patch graft, if performed; axillary- brachial                                                                                                                                                                                                                 | Thromboendarterectomy                              |
| 60520     | Thymectomy, partial or total; transcervical approach (separate procedure)                                                                                                                                                                                                                      | Thymectomy, with or without lymphadenectomy        |
| 60521     | Thymectomy, partial or total; sternal split or transthoracic approach, without radical mediastinal dissection (separate procedure)                                                                                                                                                             | Thymectomy, with or without lymphadenectomy        |
| 60522     | Thymectomy, partial or total; sternal split or transthoracic approach, with radical mediastinal dissection (separate procedure)                                                                                                                                                                | Thymectomy, with or without lymphadenectomy        |
| 60254     | Thyroidectomy, total or subtotal for malignancy; with radical neck dissection                                                                                                                                                                                                                  | Thyroidectomy, with or without lymphadenectomy     |
| 60252     | Thyroidectomy, total or subtotal for malignancy; with limited neck dissection                                                                                                                                                                                                                  | Thyroidectomy, with or without lymphadenectomy     |
| 60270     | Thyroidectomy, including substernal thyroid; sternal split or transthoracic approach                                                                                                                                                                                                           | Thyroidectomy, with or without lymphadenectomy     |
| 60271     | Thyroidectomy, including substernal thyroid; cervical approach                                                                                                                                                                                                                                 | Thyroidectomy, with or without lymphadenectomy     |
| 60260     | Thyroidectomy, removal of all remaining thyroid tissue following previous removal of a portion of thyroid                                                                                                                                                                                      | Thyroidectomy, with or without lymphadenectomy     |
| 60240     | Thyroidectomy, total or complete                                                                                                                                                                                                                                                               | Thyroidectomy, with or without lymphadenectomy     |
| 60225     | Total thyroid lobectomy, unilateral; with contralateral subtotal lobectomy, including isthmusectomy                                                                                                                                                                                            | Thyroidectomy, with or without lymphadenectomy     |
| 60220     | Total thyroid lobectomy, unilateral; with or without isthmusectomy                                                                                                                                                                                                                             | Thyroidectomy, with or without lymphadenectomy     |
| 60212     | Partial thyroid lobectomy, unilateral; with contralateral subtotal lobectomy, including isthmusectomy                                                                                                                                                                                          | Thyroidectomy, with or without lymphadenectomy     |
| 60210     | Partial thyroid lobectomy, unilateral; with or without isthmusectomy                                                                                                                                                                                                                           | Thyroidectomy, with or without lymphadenectomy     |
| 37182     | Insertion of transvenous intrahepatic portosystemic shunt(s) (TIPS) (includes venous access, hepatic and portal vein catheterization, portography with hemodynamic evaluation, intrahepatic tract formation/dilatation, stent placement and all associated imaging guidance and documentation) | TIPS                                               |
| 11960     | Insertion of tissue expander(s) for other than breast, including subsequent expansion                                                                                                                                                                                                          | Tissue expander placement, excluding breast        |
| 41512     | Tongue base suspension, permanent suture technique                                                                                                                                                                                                                                             | Tongue base suspension, permanent suture technique |
| 42836     | Adenoidectomy, secondary; age 12 or over                                                                                                                                                                                                                                                       | Tonsillectomy and/or adenoidectomy                 |
| 42835     | Adenoidectomy, secondary; younger than age 12                                                                                                                                                                                                                                                  | Tonsillectomy and/or adenoidectomy                 |
| 42831     | Adenoidectomy, primary; age 12 or over                                                                                                                                                                                                                                                         | Tonsillectomy and/or adenoidectomy                 |
| 42830     | Adenoidectomy, primary; younger than age 12                                                                                                                                                                                                                                                    | Tonsillectomy and/or adenoidectomy                 |

| Continued |                                                                                                                                                                                                                                                                                                                                                                                                                                                                                                |                                                                       |
|-----------|------------------------------------------------------------------------------------------------------------------------------------------------------------------------------------------------------------------------------------------------------------------------------------------------------------------------------------------------------------------------------------------------------------------------------------------------------------------------------------------------|-----------------------------------------------------------------------|
| Code      | Code description                                                                                                                                                                                                                                                                                                                                                                                                                                                                               | Procedure type                                                        |
| 42826     | Tonsillectomy, primary or secondary; age 12 or over                                                                                                                                                                                                                                                                                                                                                                                                                                            | Tonsillectomy and/or adenoidectomy                                    |
| 42825     | Tonsillectomy, primary or secondary; younger than age 12                                                                                                                                                                                                                                                                                                                                                                                                                                       | Tonsillectomy and/or adenoidectomy                                    |
| 42821     | Tonsillectomy and adenoidectomy; age 12 or over                                                                                                                                                                                                                                                                                                                                                                                                                                                | Tonsillectomy and/or adenoidectomy                                    |
| 42820     | Tonsillectomy and adenoidectomy; younger than age 12                                                                                                                                                                                                                                                                                                                                                                                                                                           | Tonsillectomy and/or adenoidectomy                                    |
| 65850     | Trabeculectomy ab externo                                                                                                                                                                                                                                                                                                                                                                                                                                                                      | Trabeculectomy ab externo                                             |
| 57530     | Trachelectomy (cervicectomy), amputation of cervix (separate procedure)                                                                                                                                                                                                                                                                                                                                                                                                                        | Trachelectomy, with or without lymph node dissection                  |
| 57531     | Radical trachelectomy, with bilateral total pelvic lymphadenectomy and para-aortic lymph node sampling biopsy, with or without removal of tube(s), with or without removal of ovary(s)                                                                                                                                                                                                                                                                                                         | Trachelectomy, with or without lymph node dissection                  |
| 57720     | Trachelorrhaphy, plastic repair of uterine cervix, vaginal approach                                                                                                                                                                                                                                                                                                                                                                                                                            | Trachelorrhaphy, plastic repair of uterine cervix, vaginal approach   |
| 31755     | Tracheoplasty; tracheopharyngeal fistulization, each stage                                                                                                                                                                                                                                                                                                                                                                                                                                     | Tracheoplasty                                                         |
| 31750     | Tracheoplasty; cervical                                                                                                                                                                                                                                                                                                                                                                                                                                                                        | Tracheoplasty                                                         |
| 31760     | Tracheoplasty; intrathoracic                                                                                                                                                                                                                                                                                                                                                                                                                                                                   | Tracheoplasty                                                         |
| 31614     | Tracheostoma revision; complex, with flap rotation                                                                                                                                                                                                                                                                                                                                                                                                                                             | Tracheostoma revision                                                 |
| 31613     | Tracheostoma revision; simple, without flap rotation                                                                                                                                                                                                                                                                                                                                                                                                                                           | Tracheostoma revision                                                 |
| 31610     | Tracheostomy, fenestration procedure with skin flaps                                                                                                                                                                                                                                                                                                                                                                                                                                           | Tracheostomy                                                          |
| 31605     | Tracheostomy, emergency procedure; cricothyroid membrane                                                                                                                                                                                                                                                                                                                                                                                                                                       | Tracheostomy                                                          |
| 31603     | Tracheostomy, emergency procedure; transtracheal                                                                                                                                                                                                                                                                                                                                                                                                                                               | Tracheostomy                                                          |
| 31601     | Tracheostomy, planned (separate procedure); younger than 2 years                                                                                                                                                                                                                                                                                                                                                                                                                               | Tracheostomy                                                          |
| 31600     | Tracheostomy, planned (separate procedure);                                                                                                                                                                                                                                                                                                                                                                                                                                                    | Tracheostomy                                                          |
| 33745     | Transcatheter intracardiac shunt (TIS) creation by stent placement for congenital cardiac anomalies to establish effective intracardiac flow, including all imaging guidance by the proceduralist, when performed, left and right heart diagnostic cardiac catheterization for congenital cardiac anomalies, and target zone angioplasty, when performed (eg, atrial septum, Fontan fenestration, right ventricular outflow tract, Mustard/Senning/Warden baffles); initial intracardiac shunt | Transcatheter intracardiac shunt creation                             |
| 33418     | Transcatheter mitral valve repair, percutaneous approach, including transseptal puncture when performed; initial prosthesis                                                                                                                                                                                                                                                                                                                                                                    | Transcatheter mitral valve repair                                     |
| 37204     | Transcatheter occlusion or embolization (eg, for tumor destruction, to achieve hemostasis, to occlude a vascular malformation), percutaneous, any method, non-central nervous system, non-head or neck                                                                                                                                                                                                                                                                                         | Transcatheter occlusion or embolization                               |
| 37207     | Transcatheter placement of an intravascular stent(s) (except coronary, carotid, vertebral, iliac and lower extremity arteries) - open; initial vessel                                                                                                                                                                                                                                                                                                                                          | Transcatheter placement of intravascular stent - open                 |
| 37217     | Transcatheter placement of an intravascular stent(s), intrathoracic common carotid artery or innominate artery by retrograde treatment, via open ipsilateral cervical carotid artery exposure, including angioplasty, when performed, and radiological supervision and interpretation                                                                                                                                                                                                          | Transcatheter placement of intravascular stent - open                 |
| 61635     | Transcatheter placement of intravascular stent(s), intracranial (eg, atherosclerotic stenosis), including balloon angioplasty, if performed                                                                                                                                                                                                                                                                                                                                                    | Transcatheter placement of intravascular stent(s), intracranial       |
| 37218     | Transcatheter placement of intravascular stent(s), intrathoracic common carotid artery or innominate artery - open or percutaneous antegrade approach, including angioplasty, when performed, and radiological supervision and interpretation                                                                                                                                                                                                                                                  | Transcatheter placement of intravascular stent - percutaneous         |
| 37216     | Transcatheter placement of intravascular stent(s), cervical carotid artery, percutaneous; without distal embolic protection                                                                                                                                                                                                                                                                                                                                                                    | Transcatheter placement of intravascular stent - percutaneous         |
| 37215     | Transcatheter placement of intravascular stent(s), cervical carotid artery, percutaneous; with distal embolic protection                                                                                                                                                                                                                                                                                                                                                                       | Transcatheter placement of intravascular stent - percutaneous         |
| 37205     | Transcatheter placement of an intravascular stent(s) (except coronary, carotid, vertebral, iliac, and lower extremity arteries), percutaneous; initial vessel                                                                                                                                                                                                                                                                                                                                  | Transcatheter placement of intravascular stent - percutaneous         |
| 37238     | Transcatheter placement of an intravascular stent(s) - open or percutaneous, including radiological supervision and interpretation and including angioplasty within the same vessel, when performed; initial vein                                                                                                                                                                                                                                                                              | Transcatheter placement of intravascular stent - percutaneous or open |
| 37236     | Transcatheter placement of an intravascular stent(s) (except lower extremity artery(s) for occlusive disease, cervical carotid, extracranial vertebral or intrathoracic carotid, intracranial, or coronary) - open or percutaneous, including radiological supervision and interpretation and including all angioplasty within the same vessel, when performed; initial artery                                                                                                                 | Transcatheter placement of intravascular stent - percutaneous or open |

| Continued |                                                                                                                                                                                                                                                                |                                                                                                                                    |
|-----------|----------------------------------------------------------------------------------------------------------------------------------------------------------------------------------------------------------------------------------------------------------------|------------------------------------------------------------------------------------------------------------------------------------|
| Code      | Code description                                                                                                                                                                                                                                               | Procedure type                                                                                                                     |
| 33477     | Transcatheter pulmonary valve implantation, percutaneous approach, including pre-stenting of the valve delivery site, when performed                                                                                                                           | Transcatheter pulmonary valve implantation                                                                                         |
| 47460     | Transduodenal sphincterotomy or sphincteroplasty, with or without transduodenal extraction of calculus (separate procedure)                                                                                                                                    | Transduodenal sphincterotomy or sphincteroplasty                                                                                   |
| 33922     | Transection of pulmonary artery with cardiopulmonary bypass                                                                                                                                                                                                    | Transection of pulmonary artery with cardiopulmonary bypass                                                                        |
| 50100     | Transection or repositioning of aberrant renal vessels (separate procedure)                                                                                                                                                                                    | Transection or repositioning of aberrant renal vessels                                                                             |
| 27100     | Transfer external oblique muscle to greater trochanter including fascial or tendon extension (graft)                                                                                                                                                           | Transfer external oblique muscle to greater trochanter including fascial or tendon extension (graft)                               |
| 27098     | Transfer, adductor to ischium                                                                                                                                                                                                                                  | Transfer of adductor to ischium                                                                                                    |
| 27111     | Transfer iliopsoas; to femoral neck                                                                                                                                                                                                                            | Transfer of iliopsoas to femur                                                                                                     |
| 27110     | Transfer iliopsoas; to greater trochanter of femur                                                                                                                                                                                                             | Transfer of iliopsoas to femur                                                                                                     |
| 26498     | Transfer of tendon to restore intrinsic function; all 4 fingers                                                                                                                                                                                                | Transfer of tendon of fingers                                                                                                      |
| 26497     | Transfer of tendon to restore intrinsic function; ring and small finger                                                                                                                                                                                        | Transfer of tendon of fingers                                                                                                      |
| 27400     | Transfer, tendon or muscle, hamstrings to femur (eg, Egger's type procedure)                                                                                                                                                                                   | Transfer of tendon or muscle, hamstrings to femur                                                                                  |
| 27105     | Transfer paraspinal muscle to hip (includes fascial or tendon extension graft)                                                                                                                                                                                 | Transfer paraspinal muscle to hip (includes fascial or tendon extension graft)                                                     |
| 33140     | Transmyocardial laser revascularization, by thoracotomy; (separate procedure)                                                                                                                                                                                  | Transmyocardial laser revascularization, by thoracotomy                                                                            |
| 61576     | Transoral approach to skull base, brain stem or upper spinal cord for biopsy, decompression or excision of lesion; requiring splitting of tongue and/or mandible (including tracheostomy)                                                                      | Transoral approach to skull base, brain stem or upper spinal cord for biopsy                                                       |
| 61575     | Transoral approach to skull base, brain stem or upper spinal cord for biopsy, decompression or excision of lesion;                                                                                                                                             | Transoral approach to skull base, brain stem or upper spinal cord for biopsy                                                       |
| 44136     | Intestinal allotransplantation; from living donor                                                                                                                                                                                                              | Transplantation of intestines                                                                                                      |
| 44135     | Intestinal allotransplantation; from cadaver donor                                                                                                                                                                                                             | Transplantation of intestines                                                                                                      |
| 44133     | Donor enterectomy (including cold preservation) - open; partial, from living donor                                                                                                                                                                             | Transplantation of intestines                                                                                                      |
| 50380     | Renal autotransplantation, reimplantation of kidney                                                                                                                                                                                                            | Transplantation of kidneys                                                                                                         |
| 50365     | Renal allotransplantation, implantation of graft; with recipient nephrectomy                                                                                                                                                                                   | Transplantation of kidneys                                                                                                         |
| 50360     | Renal allotransplantation, implantation of graft; without recipient nephrectomy                                                                                                                                                                                | Transplantation of kidneys                                                                                                         |
| 50340     | Recipient nephrectomy (separate procedure)                                                                                                                                                                                                                     | Transplantation of kidneys                                                                                                         |
| 50320     | Donor nephrectomy (including cold preservation); open, from living donor                                                                                                                                                                                       | Transplantation of kidneys                                                                                                         |
| 48554     | Transplantation of pancreatic allograft                                                                                                                                                                                                                        | Transplantation of pancreas                                                                                                        |
| 54680     | Transplantation of testis(es) to thigh (because of scrotal destruction)                                                                                                                                                                                        | Transplantation of testis(es) to thigh                                                                                             |
| 58825     | Transposition, ovary(s)                                                                                                                                                                                                                                        | Transposition of ovary(s)                                                                                                          |
| 45000     | Transrectal drainage of pelvic abscess                                                                                                                                                                                                                         | Transrectal drainage of pelvic abscess                                                                                             |
| 61597     | Transcondylar (far lateral) approach to posterior cranial fossa, jugular foramen or midline skull base, including occipital condylectomy, mastoidectomy, resection of C1-C3 vertebral body(s), decompression of vertebral artery, with or without mobilization | Transtemporal, transcochlear, transcondylar, transpetrosal approach to posterior cranial fossa                                     |
| 61596     | Transcochlear approach to posterior cranial fossa, jugular foramen or midline skull base, including labyrinthectomy, decompression, with or without mobilization of facial nerve and/or petrous carotid artery                                                 | Transtemporal, transcochlear, transcondylar, transpetrosal approach to posterior cranial fossa                                     |
| 61595     | Transtemporal approach to posterior cranial fossa, jugular foramen or midline skull base, including mastoidectomy, decompression of sigmoid sinus and/or facial nerve, with or without mobilization                                                            | Transtemporal, transcochlear, transcondylar, transpetrosal approach to posterior cranial fossa                                     |
| 61598     | Transpetrosal approach to posterior cranial fossa, clivus or foramen magnum, including ligation of superior petrosal sinus and/or sigmoid sinus                                                                                                                | Transtemporal, transcochlear, transcondylar, transpetrosal approach to posterior cranial fossa, with or without resection of C1-C3 |
| 33621     | Transthoracic insertion of catheter for stent placement with catheter removal and closure (eg, hybrid approach stage 1)                                                                                                                                        | Transthoracic insertion of catheter for stent placement with catheter removal and closure (eg, hybrid approach stage 1)            |
| 50770     | Transureteroureterostomy, anastomosis of ureter to contralateral ureter                                                                                                                                                                                        | Transureteroureterostomy                                                                                                           |

| Continued |                                                                                                                                                                                                                                                                                                       |                                                                       |
|-----------|-------------------------------------------------------------------------------------------------------------------------------------------------------------------------------------------------------------------------------------------------------------------------------------------------------|-----------------------------------------------------------------------|
| Code      | Code description                                                                                                                                                                                                                                                                                      | Procedure type                                                        |
| 52640     | Transurethral resection; of postoperative bladder neck contracture                                                                                                                                                                                                                                    | Transurethral resection of prostate                                   |
| 52630     | Transurethral resection; residual or regrowth of obstructive prostate tissue including control of postoperative bleeding, complete (vasectomy, meatotomy, cystourethroscopy, urethral calibration and/or dilation, and internal urethrotomy are included)                                             | Transurethral resection of prostate                                   |
| 52601     | Transurethral electroresection of prostate, including control of postoperative bleeding, complete (vasectomy, meatotomy, cystourethroscopy, urethral calibration and/or dilation, and internal urethrotomy are included)                                                                              | Transurethral resection of prostate                                   |
| 51060     | Transvesical ureterolithotomy                                                                                                                                                                                                                                                                         | Transvesical ureterolithotomy                                         |
| 33600     | Closure of atrioventricular valve (mitral or tricuspid) by suture or patch                                                                                                                                                                                                                            | Tricuspid or Mitral valve repair/reconstruction - open                |
| 33468     | Tricuspid valve repositioning and plication for Ebstein anomaly                                                                                                                                                                                                                                       | Tricuspid or Mitral valve repair/reconstruction - open                |
| 33465     | Replacement, tricuspid valve, with cardiopulmonary bypass                                                                                                                                                                                                                                             | Tricuspid or Mitral valve repair/reconstruction - open                |
| 33464     | Valvuloplasty, tricuspid valve; with ring insertion                                                                                                                                                                                                                                                   | Tricuspid or Mitral valve repair/reconstruction - open                |
| 33463     | Valvuloplasty, tricuspid valve; without ring insertion                                                                                                                                                                                                                                                | Tricuspid or Mitral valve repair/reconstruction - open                |
| 33460     | Valvectomy, tricuspid valve, with cardiopulmonary bypass                                                                                                                                                                                                                                              | Tricuspid or Mitral valve repair/reconstruction - open                |
| 33430     | Replacement, mitral valve, with cardiopulmonary bypass                                                                                                                                                                                                                                                | Tricuspid or Mitral valve repair/reconstruction - open                |
| 33427     | Valvuloplasty, mitral valve, with cardiopulmonary bypass; radical reconstruction, with or without ring                                                                                                                                                                                                | Tricuspid or Mitral valve repair/reconstruction - open                |
| 33426     | Valvuloplasty, mitral valve, with cardiopulmonary bypass; with prosthetic ring                                                                                                                                                                                                                        | Tricuspid or Mitral valve repair/reconstruction - open                |
| 33425     | Valvuloplasty, mitral valve, with cardiopulmonary bypass;                                                                                                                                                                                                                                             | Tricuspid or Mitral valve repair/reconstruction - open                |
| 33422     | Valvotomy, mitral valve; open heart, with cardiopulmonary bypass                                                                                                                                                                                                                                      | Tricuspid or Mitral valve repair/reconstruction - open                |
| 33420     | Valvotomy, mitral valve; closed heart                                                                                                                                                                                                                                                                 | Tricuspid or Mitral valve repair/reconstruction - open                |
| 26055     | Tendon sheath incision (eg, for trigger finger)                                                                                                                                                                                                                                                       | Trigger finger release                                                |
| 33786     | Total repair, truncus arteriosus (Rastelli type operation)                                                                                                                                                                                                                                            | Truncus arteriosus repair                                             |
| 33015     | Tube pericardiostomy                                                                                                                                                                                                                                                                                  | Tube pericardiostomy                                                  |
| 27418     | Anterior tibial tubercleplasty (eg, Maquet type procedure)                                                                                                                                                                                                                                            | Tubercleplasty of anterior tibia                                      |
| 58750     | Tubotubal anastomosis                                                                                                                                                                                                                                                                                 | Tubotubal anastomosis                                                 |
| 58752     | Tubouterine implantation                                                                                                                                                                                                                                                                              | Tubouterine implantation                                              |
| 23200     | Radical resection of tumor; clavicle                                                                                                                                                                                                                                                                  | Resection of bone tumor                                               |
| 26262     | Radical resection of tumor; distal phalanx of finger                                                                                                                                                                                                                                                  | Resection of bone tumor                                               |
| 24150     | Radical resection of tumor; shaft or distal humerus                                                                                                                                                                                                                                                   | Resection of bone tumor                                               |
| 23220     | Radical resection of tumor; proximal humerus                                                                                                                                                                                                                                                          | Resection of bone tumor                                               |
| 27076     | Radical resection of tumor; ilium, including acetabulum, both pubic rami, or ischium and acetabulum                                                                                                                                                                                                   | Resection of bone tumor                                               |
| 27075     | Radical resection of tumor; wing of ilium, 1 pubic or ischial ramus or symphysis pubis                                                                                                                                                                                                                | Resection of bone tumor                                               |
| 27077     | Radical resection of tumor; innominate bone, total                                                                                                                                                                                                                                                    | Resection of bone tumor                                               |
| 27078     | Radical resection of tumor; ischial tuberosity and greater trochanter of femur                                                                                                                                                                                                                        | Resection of bone tumor                                               |
| 26250     | Radical resection of tumor; metacarpal                                                                                                                                                                                                                                                                | Resection of bone tumor                                               |
| 26260     | Radical resection of tumor; proximal or middle phalanx of finger                                                                                                                                                                                                                                      | Resection of bone tumor                                               |
| 24152     | Radical resection of tumor; radial head or neck                                                                                                                                                                                                                                                       | Resection of bone tumor                                               |
| 25170     | Radical resection of tumor; radius or ulna                                                                                                                                                                                                                                                            | Resection of bone tumor                                               |
| 23210     | Radical resection of tumor; scapula                                                                                                                                                                                                                                                                   | Resection of bone tumor                                               |
| 61867     | Twist drill, burr hole, craniotomy, or craniectomy with stereotactic implantation of neurostimulator electrode array in subcortical site (eg, thalamus, globus pallidus, subthalamic nucleus, periventricular, periaqueductal gray), with use of intraoperative microelectrode recording; first array | Twist drill hole for subdural, intracerebral, or ventricular puncture |

| Continued |                                                                                                                                                                                                                                                                                                          |                                                                       |
|-----------|----------------------------------------------------------------------------------------------------------------------------------------------------------------------------------------------------------------------------------------------------------------------------------------------------------|-----------------------------------------------------------------------|
| Code      | Code description                                                                                                                                                                                                                                                                                         | Procedure type                                                        |
| 61863     | Twist drill, burr hole, craniotomy, or craniectomy with stereotactic implantation of neurostimulator electrode array in subcortical site (eg, thalamus, globus pallidus, subthalamic nucleus, periventricular, periaqueductal gray), without use of intraoperative microelectrode recording; first array | Twist drill hole for subdural, intracerebral, or ventricular puncture |
| 61850     | Twist drill or burr hole(s) for implantation of neurostimulator electrodes, cortical                                                                                                                                                                                                                     | Twist drill hole for subdural, intracerebral, or ventricular puncture |
| 61108     | Twist drill hole(s) for subdural, intracerebral, or ventricular puncture; for evacuation and/or drainage of subdural hematoma                                                                                                                                                                            | Twist drill hole for subdural, intracerebral, or ventricular puncture |
| 61107     | Twist drill hole(s) for subdural, intracerebral, or ventricular puncture; for implanting ventricular catheter, pressure recording device, or other intracerebral monitoring device                                                                                                                       | Twist drill hole for subdural, intracerebral, or ventricular puncture |
| 61105     | Twist drill hole for subdural or ventricular puncture                                                                                                                                                                                                                                                    | Twist drill hole for subdural, intracerebral, or ventricular puncture |
| 69676     | Tympanic neurectomy                                                                                                                                                                                                                                                                                      | Tympanic neurectomy                                                   |
| 69646     | Tympanoplasty with mastoidectomy (including canalplasty, middle ear surgery, tympanic membrane repair); radical or complete, with ossicular chain reconstruction                                                                                                                                         | Tympanoplasty                                                         |
| 69645     | Tympanoplasty with mastoidectomy (including canalplasty, middle ear surgery, tympanic membrane repair); radical or complete, without ossicular chain reconstruction                                                                                                                                      | Tympanoplasty                                                         |
| 69644     | Tympanoplasty with mastoidectomy (including canalplasty, middle ear surgery, tympanic membrane repair); with intact or reconstructed canal wall, with ossicular chain reconstruction                                                                                                                     | Tympanoplasty                                                         |
| 69643     | Tympanoplasty with mastoidectomy (including canalplasty, middle ear surgery, tympanic membrane repair); with intact or reconstructed wall, without ossicular chain reconstruction                                                                                                                        | Tympanoplasty                                                         |
| 69642     | Tympanoplasty with mastoidectomy (including canalplasty, middle ear surgery, tympanic membrane repair); with ossicular chain reconstruction                                                                                                                                                              | Tympanoplasty                                                         |
| 69641     | Tympanoplasty with mastoidectomy (including canalplasty, middle ear surgery, tympanic membrane repair); without ossicular chain reconstruction                                                                                                                                                           | Tympanoplasty                                                         |
| 69637     | Tympanoplasty with antrotomy or mastoidotomy (including canalplasty, atticotomy, middle ear surgery, and/or tympanic membrane repair); with ossicular chain reconstruction and synthetic prosthesis (eg, partial ossicular replacement prosthesis [PORP], total ossicular replacement prosthesis [TORP]) | Tympanoplasty                                                         |
| 69636     | Tympanoplasty with antrotomy or mastoidotomy (including canalplasty, atticotomy, middle ear surgery, and/or tympanic membrane repair); with ossicular chain reconstruction                                                                                                                               | Tympanoplasty                                                         |
| 69635     | Tympanoplasty with antrotomy or mastoidotomy (including canalplasty, atticotomy, middle ear surgery, and/or tympanic membrane repair); without ossicular chain reconstruction                                                                                                                            | Tympanoplasty                                                         |
| 69633     | Tympanoplasty without mastoidectomy (including canalplasty, atticotomy and/or middle ear surgery), initial or revision; with ossicular chain reconstruction and synthetic prosthesis (eg, partial ossicular replacement prosthesis [PORP], total ossicular replacement prosthesis [TORP])                | Tympanoplasty                                                         |
| 69632     | Tympanoplasty without mastoidectomy (including canalplasty, atticotomy and/or middle ear surgery), initial or revision; with ossicular chain reconstruction (eg, postfenestration)                                                                                                                       | Tympanoplasty                                                         |
| 69631     | Tympanoplasty without mastoidectomy (including canalplasty, atticotomy and/or middle ear surgery), initial or revision; without ossicular chain reconstruction                                                                                                                                           | Tympanoplasty                                                         |
| 69436     | Tympanostomy (requiring insertion of ventilating tube), general anesthesia                                                                                                                                                                                                                               | Tympanostomy                                                          |
| 49250     | Umbilectomy, omphalectomy, excision of umbilicus (separate procedure)                                                                                                                                                                                                                                    | Umbilectomy, omphalectomy, excision of umbilicus                      |
| 50660     | Ureterectomy, total, ectopic ureter, combination abdominal, vaginal and/or perineal approach                                                                                                                                                                                                             | Ureterectomy                                                          |
| 50650     | Ureterectomy, with bladder cuff (separate procedure)                                                                                                                                                                                                                                                     | Ureterectomy                                                          |
| 50750     | Ureterocalycostomy, anastomosis of ureter to renal calyx                                                                                                                                                                                                                                                 | Ureterocalycostomy, anastomosis of ureter to renal calyx              |
| 50815     | Ureterocolon conduit, including intestine anastomosis                                                                                                                                                                                                                                                    | Ureterocolon conduit, including intestine anastomosis                 |
| 50800     | Ureteroenterostomy, direct anastomosis of ureter to intestine                                                                                                                                                                                                                                            | Ureteroenterostomy                                                    |
| 50820     | Ureteroileal conduit (ileal bladder), including intestine anastomosis (Bricker operation)                                                                                                                                                                                                                | Ureteroileal conduit (ileal bladder), including intestine anastomosis |
| 50945     | Laparoscopy, surgical; ureterolithotomy                                                                                                                                                                                                                                                                  | Ureterolithotomy - laparoscopic                                       |
| 50630     | Ureterolithotomy; lower 1/3 of ureter                                                                                                                                                                                                                                                                    | Ureterolithotomy - open                                               |

| Continued |                                                                                                                                                                                                                                                                                                                                                 |                                                                                                                                              |
|-----------|-------------------------------------------------------------------------------------------------------------------------------------------------------------------------------------------------------------------------------------------------------------------------------------------------------------------------------------------------|----------------------------------------------------------------------------------------------------------------------------------------------|
| Code      | Code description                                                                                                                                                                                                                                                                                                                                | Procedure type                                                                                                                               |
| 50620     | Ureterolithotomy; middle 1/3 of ureter                                                                                                                                                                                                                                                                                                          | Ureterolithotomy - open                                                                                                                      |
| 50610     | Ureterolithotomy; upper 1/3 of ureter                                                                                                                                                                                                                                                                                                           | Ureterolithotomy - open                                                                                                                      |
| 50725     | Ureterolysis for retrocaval ureter, with reanastomosis of upper urinary tract or vena cava                                                                                                                                                                                                                                                      | Ureterolysis                                                                                                                                 |
| 50722     | Ureterolysis for ovarian vein syndrome                                                                                                                                                                                                                                                                                                          | Ureterolysis                                                                                                                                 |
| 50715     | Ureterolysis, with or without repositioning of ureter for retroperitoneal fibrosis                                                                                                                                                                                                                                                              | Ureterolysis                                                                                                                                 |
| 50948     | Laparoscopy, surgical; ureteroneocystostomy without cystoscopy and ureteral stent placement                                                                                                                                                                                                                                                     | Ureteroneocystostomy                                                                                                                         |
| 50947     | Laparoscopy, surgical; ureteroneocystostomy with cystoscopy and ureteral stent placement                                                                                                                                                                                                                                                        | Ureteroneocystostomy                                                                                                                         |
| 50785     | Ureteroneocystostomy; with vesico-psoas hitch or bladder flap                                                                                                                                                                                                                                                                                   | Ureteroneocystostomy                                                                                                                         |
| 50783     | Ureteroneocystostomy; with extensive ureteral tailoring                                                                                                                                                                                                                                                                                         | Ureteroneocystostomy                                                                                                                         |
| 50782     | Ureteroneocystostomy; anastomosis of duplicated ureter to bladder                                                                                                                                                                                                                                                                               | Ureteroneocystostomy                                                                                                                         |
| 50780     | Ureteroneocystostomy; anastomosis of single ureter to bladder                                                                                                                                                                                                                                                                                   | Ureteroneocystostomy                                                                                                                         |
| 50700     | Ureteroplasty, plastic operation on ureter (eg, stricture)                                                                                                                                                                                                                                                                                      | Ureteroplasty                                                                                                                                |
| 50740     | Ureteropyelostomy, anastomosis of ureter and renal pelvis                                                                                                                                                                                                                                                                                       | Ureteropyelostomy, anastomosis of ureter and renal pelvis                                                                                    |
| 50900     | Ureterorrhaphy, suture of ureter (separate procedure)                                                                                                                                                                                                                                                                                           | Ureterorrhaphy, suture of ureter                                                                                                             |
| 50810     | Ureterosigmoidostomy, with creation of sigmoid bladder and establishment of abdominal or perineal colostomy, including intestine anastomosis                                                                                                                                                                                                    | Ureterosigmoidostomy, with creation of sigmoid bladder and establishment of abdominal or perineal colostomy, including intestine anastomosis |
| 50860     | Ureterostomy, transplantation of ureter to skin                                                                                                                                                                                                                                                                                                 | Ureterostomy, transplantation of ureter to skin                                                                                              |
| 50605     | Ureterotomy for insertion of indwelling stent, all types                                                                                                                                                                                                                                                                                        | Ureterotomy                                                                                                                                  |
| 50760     | Ureteroureterostomy                                                                                                                                                                                                                                                                                                                             | Ureteroureterostomy                                                                                                                          |
| 53215     | Urethrectomy, total, including cystostomy; male                                                                                                                                                                                                                                                                                                 | Urethrectomy, total, including cystostomy                                                                                                    |
| 53210     | Urethrectomy, total, including cystostomy; female                                                                                                                                                                                                                                                                                               | Urethrectomy, total, including cystostomy                                                                                                    |
| 53500     | Urethrolysis, transvaginal, secondary - open, including cystourethroscopy (eg, postsurgical obstruction, scarring)                                                                                                                                                                                                                              | Urethrolysis, transvaginal, secondary - open, including cystourethroscopy (eg, postsurgical obstruction, scarring)                           |
| 53460     | Urethromeatoplasty, with partial excision of distal urethral segment (Richardson type procedure)                                                                                                                                                                                                                                                | Urethromeatoplasty                                                                                                                           |
| 53450     | Urethromeatoplasty, with mucosal advancement                                                                                                                                                                                                                                                                                                    | Urethromeatoplasty                                                                                                                           |
| 53431     | Urethroplasty with tubularization of posterior urethra and/or lower bladder for incontinence (eg, Tenago, Leadbetter procedure)                                                                                                                                                                                                                 | Urethroplasty                                                                                                                                |
| 53430     | Urethroplasty, reconstruction of female urethra                                                                                                                                                                                                                                                                                                 | Urethroplasty                                                                                                                                |
| 53425     | Urethroplasty, 2-stage reconstruction or repair of prostatic or membranous urethra; second stage                                                                                                                                                                                                                                                | Urethroplasty                                                                                                                                |
| 53420     | Urethroplasty, 2-stage reconstruction or repair of prostatic or membranous urethra; first stage                                                                                                                                                                                                                                                 | Urethroplasty                                                                                                                                |
| 53415     | Urethroplasty, transpubic or perineal, 1-stage, for reconstruction or repair of prostatic or membranous urethra                                                                                                                                                                                                                                 | Urethroplasty                                                                                                                                |
| 53410     | Urethroplasty, 1-stage reconstruction of male anterior urethra                                                                                                                                                                                                                                                                                  | Urethroplasty                                                                                                                                |
| 53405     | Urethroplasty; second stage (formation of urethra), including urinary diversion                                                                                                                                                                                                                                                                 | Urethroplasty                                                                                                                                |
| 53400     | Urethroplasty; first stage, for fistula, diverticulum, or stricture (eg, Johanssen type)                                                                                                                                                                                                                                                        | Urethroplasty                                                                                                                                |
| 53515     | Urethrorrhaphy, suture of urethral wound or injury; prostatomembranous                                                                                                                                                                                                                                                                          | Urethrorrhaphy                                                                                                                               |
| 53510     | Urethrorrhaphy, suture of urethral wound or injury; perineal                                                                                                                                                                                                                                                                                    | Urethrorrhaphy                                                                                                                               |
| 53505     | Urethrorrhaphy, suture of urethral wound or injury; penile                                                                                                                                                                                                                                                                                      | Urethrorrhaphy                                                                                                                               |
| 53502     | Urethrorrhaphy, suture of urethral wound or injury, female                                                                                                                                                                                                                                                                                      | Urethrorrhaphy                                                                                                                               |
| 53000     | Urethrotomy or urethrostomy, external (separate procedure); pendulous urethra                                                                                                                                                                                                                                                                   | Urethrorrhaphy                                                                                                                               |
| 50830     | Urinary undiversion (eg, taking down of ureteroileal conduit, ureterosigmoidostomy or ureteroenterostomy with ureteroureterostomy or ureteroneocystostomy)                                                                                                                                                                                      | Urinary undiversion                                                                                                                          |
| 37210     | Uterine fibroid embolization (UFE, embolization of the uterine arteries to treat uterine fibroids, leiomyomata), percutaneous approach inclusive of vascular access, vessel selection, embolization, and all radiological supervision and interpretation, intraprocedural roadmapping, and imaging guidance necessary to complete the procedure | Uterine fibroid embolization                                                                                                                 |
| 58410     | Uterine suspension, with or without shortening of round ligaments, with or without shortening of sacrouterine ligaments; with presacral sympathectomy                                                                                                                                                                                           | Uterine suspension                                                                                                                           |

| Continued |                                                                                                                                                                                                  |                                                                              |
|-----------|--------------------------------------------------------------------------------------------------------------------------------------------------------------------------------------------------|------------------------------------------------------------------------------|
| Code      | Code description                                                                                                                                                                                 | Procedure type                                                               |
| 58400     | Uterine suspension, with or without shortening of round ligaments, with or without shortening of sacrouterine ligaments; (separate procedure)                                                    | Uterine suspension                                                           |
| 47802     | U-tube hepaticocenterostomy                                                                                                                                                                      | U-tube hepaticocenterostomy                                                  |
| 42140     | Uvulectomy, excision of uvula                                                                                                                                                                    | Uvulectomy, excision of uvula                                                |
| 57111     | Vaginectomy, complete removal of vaginal wall; with removal of paravaginal tissue (radical vaginectomy)                                                                                          | Vaginectomy                                                                  |
| 57110     | Vaginectomy, complete removal of vaginal wall;                                                                                                                                                   | Vaginectomy                                                                  |
| 57107     | Vaginectomy, partial removal of vaginal wall; with removal of paravaginal tissue (radical vaginectomy)                                                                                           | Vaginectomy                                                                  |
| 57106     | Vaginectomy, partial removal of vaginal wall;                                                                                                                                                    | Vaginectomy                                                                  |
| 57112     | Vaginectomy, complete removal of vaginal wall; with removal of paravaginal tissue (radical vaginectomy) with bilateral total pelvic lymphadenectomy and para-aortic lymph node sampling (biopsy) | Vaginectomy                                                                  |
| 57109     | Vaginectomy, partial removal of vaginal wall; with removal of paravaginal tissue (radical vaginectomy) with bilateral total pelvic lymphadenectomy and para-aortic lymph node sampling (biopsy)  | Vaginectomy                                                                  |
| 43641     | Vagotomy including pyloroplasty, with or without gastrostomy; parietal cell (highly selective)                                                                                                   | Vagotomy including pyloroplasty, with or without gastrostomy                 |
| 43640     | Vagotomy including pyloroplasty, with or without gastrostomy; truncal or selective                                                                                                               | Vagotomy including pyloroplasty, with or without gastrostomy                 |
| 34501     | Valvuloplasty, femoral vein                                                                                                                                                                      | Valvuloplasty of femoral vein                                                |
| 55550     | Laparoscopy, surgical, with ligation of spermatic veins for varicocele                                                                                                                           | Varicocele repair                                                            |
| 55540     | Excision of varicocele or ligation of spermatic veins for varicocele; with hernia repair                                                                                                         | Varicocele repair                                                            |
| 55535     | Excision of varicocele or ligation of spermatic veins for varicocele; abdominal approach                                                                                                         | Varicocele repair                                                            |
| 55530     | Excision of varicocele or ligation of spermatic veins for varicocele; (separate procedure)                                                                                                       | Varicocele repair                                                            |
| 37500     | Vascular endoscopy, surgical, with ligation of perforator veins, subfascial (SEPS)                                                                                                               | Varicose vein ligation                                                       |
| 55400     | Vasovasostomy, vasovasorrhaphy                                                                                                                                                                   | Vasovasostomy, vasovasorrhaphy                                               |
| 37181     | Venous anastomosis - open; splenorenal, distal (selective decompression of esophago-gastric varices, any technique)                                                                              | Venous bypass, abdominal - open                                              |
| 37180     | Venous anastomosis - open; splenorenal, proximal                                                                                                                                                 | Venous bypass, abdominal - open                                              |
| 37160     | Venous anastomosis - open; caval-mesenteric                                                                                                                                                      | Venous bypass, abdominal - open                                              |
| 37145     | Venous anastomosis - open; renoportal                                                                                                                                                            | Venous bypass, abdominal - open                                              |
| 37140     | Venous anastomosis - open; portocaval                                                                                                                                                            | Venous bypass, abdominal - open                                              |
| 34520     | Cross-over vein graft to venous system                                                                                                                                                           | Venous bypass, cross-over vein graft to venous system                        |
| 34530     | Saphenopopliteal vein anastomosis                                                                                                                                                                | Venous bypass, lower extremity                                               |
| 34510     | Venous valve transposition, any vein donor                                                                                                                                                       | Venous valve transposition, any vein donor                                   |
| 62180     | Ventriculocisternostomy (Torkildsen type operation)                                                                                                                                              | Ventriculocisternostomy (Torkildsen type operation)                          |
| 62201     | Ventriculocisternostomy, third ventricle; stereotactic, neuroendoscopic method                                                                                                                   | Ventriculocisternostomy, third ventricle                                     |
| 62200     | Ventriculocisternostomy, third ventricle;                                                                                                                                                        | Ventriculocisternostomy, third ventricle                                     |
| 33416     | Ventriculomyotomy (-myectomy) for idiopathic hypertrophic subaortic stenosis (eg, asymmetric septal hypertrophy)                                                                                 | Ventriculomyotomy (-myectomy) for idiopathic hypertrophic subaortic stenosis |
| 40500     | Vermilionectomy (lip shave), with mucosal advancement                                                                                                                                            | Vermilionectomy, with mucosal advancement                                    |
| 51841     | Anterior vesicourethropexy, or urethropexy (eg, Marshall-Marchetti-Krantz, Burch); complicated (eg, secondary repair)                                                                            | Vesicourethropexy or urethropexy, anterior                                   |
| 51840     | Anterior vesicourethropexy, or urethropexy (eg, Marshall-Marchetti-Krantz, Burch); simple                                                                                                        | Vesicourethropexy or urethropexy, anterior                                   |
| 55650     | Vesiculectomy, any approach                                                                                                                                                                      | Vesiculotomy                                                                 |
| 55605     | Vesiculotomy; complicated                                                                                                                                                                        | Vesiculotomy                                                                 |
| 55600     | Vesiculotomy;                                                                                                                                                                                    | Vesiculotomy                                                                 |
| 69950     | Vestibular nerve section, transcranial approach                                                                                                                                                  | Vestibular nerve section                                                     |
| 69915     | Vestibular nerve section, translabyrinthine approach                                                                                                                                             | Vestibular nerve section                                                     |
| 40845     | Vestibuloplasty; complex (including ridge extension, muscle repositioning)                                                                                                                       | Vestibuloplasty                                                              |

| Continued |                                                                                                                                                                                                                                          |                 |
|-----------|------------------------------------------------------------------------------------------------------------------------------------------------------------------------------------------------------------------------------------------|-----------------|
| Code      | Code description                                                                                                                                                                                                                         | Procedure type  |
| 40844     | Vestibuloplasty; entire arch                                                                                                                                                                                                             | Vestibuloplasty |
| 40843     | Vestibuloplasty; posterior, bilateral                                                                                                                                                                                                    | Vestibuloplasty |
| 40842     | Vestibuloplasty; posterior, unilateral                                                                                                                                                                                                   | Vestibuloplasty |
| 40840     | Vestibuloplasty; anterior                                                                                                                                                                                                                | Vestibuloplasty |
| 67043     | Vitrectomy, mechanical, pars plana approach; with removal of subretinal membrane (eg, choroidal neovascularization), includes, if performed, intraocular tamponade (ie, air, gas or silicone oil) and laser photocoagulation             | Vitrectomy      |
| 67042     | Vitrectomy, mechanical, pars plana approach; with removal of internal limiting membrane of retina (eg, for repair of macular hole, diabetic macular edema), includes, if performed, intraocular tamponade (ie, air, gas or silicone oil) | Vitrectomy      |
| 67041     | Vitrectomy, mechanical, pars plana approach; with removal of preretinal cellular membrane (eg, macular pucker)                                                                                                                           | Vitrectomy      |
| 67040     | Vitrectomy, mechanical, pars plana approach; with endolaser panretinal photocoagulation                                                                                                                                                  | Vitrectomy      |
| 67039     | Vitrectomy, mechanical, pars plana approach; with focal endolaser photocoagulation                                                                                                                                                       | Vitrectomy      |
| 67036     | Vitrectomy, mechanical, pars plana approach;                                                                                                                                                                                             | Vitrectomy      |
| 56620     | Vulvectomy simple; partial                                                                                                                                                                                                               | Vulvectomy      |
| 56640     | Vulvectomy, radical, complete, with inguinofemoral, iliac, and pelvic lymphadenectomy                                                                                                                                                    | Vulvectomy      |
| 56637     | Vulvectomy, radical, complete; with bilateral inguinofemoral lymphadenectomy                                                                                                                                                             | Vulvectomy      |
| 56634     | Vulvectomy, radical, complete; with unilateral inguinofemoral lymphadenectomy                                                                                                                                                            | Vulvectomy      |
| 56632     | Vulvectomy, radical, partial; with bilateral inguinofemoral lymphadenectomy                                                                                                                                                              | Vulvectomy      |
| 56631     | Vulvectomy, radical, partial; with unilateral inguinofemoral lymphadenectomy                                                                                                                                                             | Vulvectomy      |
| 56633     | Vulvectomy, radical, complete                                                                                                                                                                                                            | Vulvectomy      |
| 56630     | Vulvectomy, radical, partial                                                                                                                                                                                                             | Vulvectomy      |
| 56625     | Vulvectomy simple; complete                                                                                                                                                                                                              | Vulvectomy      |
